# Supplementary material for: A binuclear guanidinate yttrium carbyne complex: unique reactivity toward unsaturated C–N, C–O and C–S bonds
Source: Royal Society of Chemistry journal article supplement (doi:10.1039/d3sc03483f), 2023-01-01
Supplement: d3sc03483f1.pdf [file d3sc03483f1.pdf]

## ***Supporting Information***

# **Binuclear Guanidinate Yttrium Carbyne Complex: Unique Reactivity toward Unsaturated C–N, C–O and C–S Bonds**

*Wen Jiang,<sup>†1</sup> Feng Kong,<sup>†1</sup> Iker del Rosal,<sup>2</sup> Meng Li,<sup>1</sup> Kai Wang,<sup>1</sup> Laurent Maron\*<sup>2</sup>  
and Lixin Zhang\*<sup>1</sup>*

---

<sup>1</sup> Department of Chemistry, Shanghai Key Laboratory of Molecular Catalysis and Innovative Materials Fudan University, Shanghai, 200438 (P. R. China)

<sup>2</sup> LPCNO, CNRS, and INSA, Université Paul Sabatier, 135 Avenue de Rangueil, Toulouse 31077, France

<sup>†</sup> These authors contributed equally to this work.

E-mail: [lixinzhang@fudan.edu.cn](mailto:lixinzhang@fudan.edu.cn) and [maron@irsamc.ups-tlse.fr](mailto:maron@irsamc.ups-tlse.fr)

### **Tables of Contents**

General procedure (page 2)

Experiment section (page 2-5)

NMR spectra of selected complexes (page 6-17)

Molecular structure of selected complexes (page 18-23)

Crystal data of selected complexes (page 24-26)

Proposed reaction pathway for formation of complex **7** (page 27)

Computational details (page 28-266)

References (page 267)

**Materials and Methods.** All manipulations were performed with rigorous exclusion of air and water, using Schlenk techniques or an MBraun glovebox (Unilab MBraun; <1 ppm O<sub>2</sub>, <1 ppm H<sub>2</sub>O). Toluene, THF, and hexane were purified using Grubbs-type columns (MBraun SPS-800, solvent purification system), then further dried over fresh Na chips and stored in a glovebox. Phenyl disulfide, sulfur and AlMe<sub>3</sub> (1 mol L<sup>-1</sup> in hexane) were purchased from J&K Co., Ltd and used without purification. Benzonitrile and phenyl isothiocyanate were obtained from J&K Co., Ltd and distilled from CaH<sub>2</sub>, then further dried by 4 Å molecular sieves. Highly pure CO (99.999%) was purchased from Pujiang Gas and dried by passing through activated 4 Å molecular sieves. Benzene-d<sub>6</sub> was obtained from J&K Co., Ltd and Cambridge Isotope and dried by using sodium chips. <sup>1</sup>H and <sup>13</sup>C{<sup>1</sup>H} NMR spectra of complexes were recorded using a JEOL ECA-400 NMR spectrometer (FT, 400 MHz for <sup>1</sup>H; 100 MHz for <sup>13</sup>C{<sup>1</sup>H}). The combustion method was used for the carbon, hydrogen and nitrogen analyses on an Elementar Vario EL III analyzer at Fudan University (China).

**[(PhCH<sub>2</sub>)<sub>2</sub>NC(NC<sub>6</sub>H<sub>3</sub><sup>i</sup>Pr<sub>2</sub>-2,6)<sub>2</sub>]<sub>2</sub>Y<sub>2</sub>(μ<sub>2</sub>-Me)(AlMe<sub>3</sub>)<sub>2</sub>(μ<sub>4</sub>-CH) (1). *Path A:* A toluene solution of AlMe<sub>3</sub> (1.5 mL, 1M in hexane, 1.5 mmol) was added slowly to a stirred toluene solution (25 mL) of [(PhCH<sub>2</sub>)<sub>2</sub>NC(NC<sub>6</sub>H<sub>3</sub><sup>i</sup>Pr<sub>2</sub>-2,6)]Y(CH<sub>2</sub>C<sub>6</sub>H<sub>4</sub>NMe<sub>2</sub>-o)<sub>2</sub> (0.46 g, 0.5 mmol). The solution was left to stir 18 h at 60 °C. The toluene and volatile substances were removed under vacuum, and the oily yellow residue turned to white powder after washing twice with hexane (2 mL), which was collected by filtration and dried. Colourless crystalline **1** was harvested by recrystallization in toluene at ambient temperature, yield (0.24 g, 67%). *Path B:* Complex [(PhCH<sub>2</sub>)<sub>2</sub>NC(NC<sub>6</sub>H<sub>3</sub><sup>i</sup>Pr<sub>2</sub>-2,6)]Y(AlMe<sub>4</sub>)(Me) (0.37 g, 0.5 mmol) could turn into complex **1** when dissolved in toluene for 7 days, recrystallization in toluene at ambient temperature, yield (0.30 g, 83%). <sup>1</sup>H NMR (400 MHz, C<sub>6</sub>D<sub>6</sub>, 25 °C): δ (ppm) = 6.99-6.97 (m, 8H, Ar), 6.92 (br, 12H, Ar), 6.87-6.84 (m, 4H, Ar), 6.78 (br, 8H, Ar), 4.06 (s, 8H, CH<sub>2</sub>Ph), 3.77 (m, 8H, CHMe<sub>2</sub>), 2.36 (s, 1H, μ<sub>4</sub>-CH), 1.42 (d, <sup>3</sup>J<sub>H-H</sub> = 6 Hz, 24H, CHMe<sub>2</sub>), 1.19 (d, <sup>3</sup>J<sub>H-H</sub> = 5.6 Hz, 24H, CHMe<sub>2</sub>), 0.34 (br, 18H, AlMe<sub>3</sub>), 0.26 (s, 3H, μ<sub>2</sub>-Me). <sup>13</sup>C{<sup>1</sup>H} NMR (100 MHz, C<sub>6</sub>D<sub>6</sub>, 25 °C): δ (ppm) = 165.0 (s, NCN), 143.1 (s, Ar), 142.3 (s, Ar), 136.7 (s, Ar), 129.3 (s, Ar), 127.5 (s, Ar), 124.7 (s, Ar), 124.2 (s, Ar), 90.1 (s, μ<sub>4</sub>-CH), 52.4 (s, CH<sub>2</sub>Ph), 29.8 (s, μ<sub>2</sub>-Me), 28.6 (s, CHMe<sub>2</sub>), 27.0 (s, CHMe<sub>2</sub>), 25.0 (s, CHMe<sub>2</sub>), 2.6 (br, AlMe<sub>3</sub>). Anal. Calcd for C<sub>86</sub>H<sub>118</sub>Al<sub>2</sub>N<sub>6</sub>Y<sub>2</sub>(%): C, 70.38; H, 8.10; N, 5.73; Found C, 70.69; H, 8.23; N, 5.67.**

**[(PhCH<sub>2</sub>)<sub>2</sub>NC(NC<sub>6</sub>H<sub>3</sub><sup>i</sup>Pr<sub>2</sub>-2,6)]Y(AlMe<sub>4</sub>)(Me) (2). An AlMe<sub>3</sub>/toluene solution (1.5 mL, 1M in hexane, 1.5 mmol) was added slowly to a stirred toluene solution (10 mL) of [(PhCH<sub>2</sub>)<sub>2</sub>NC(NC<sub>6</sub>H<sub>3</sub><sup>i</sup>Pr<sub>2</sub>-2,6)]Y(CH<sub>2</sub>C<sub>6</sub>H<sub>4</sub>NMe<sub>2</sub>-o)<sub>2</sub> (0.46 g, 0.5 mmol). The solution was left to stir 6 h at ambient temperature. The toluene was removed under vacuum, and the oily yellow residue turned to white powder after washing twice with hexane (2 mL), which was collected by filtration and dried, recrystallization in toluene at -35 °C for one day, yield (0.19 g, 53%). <sup>1</sup>H NMR (400 MHz, C<sub>6</sub>D<sub>6</sub>, 25 °C): δ (ppm) = 7.08-7.05 (m, 4H, Ar), 7.05-6.95 (m, 8H, Ar), 6.83-6.82 (m, 4H, Ar), 3.99 (br, 4H, CH<sub>2</sub>Ph), 3.82 (m, 4H, CHMe<sub>2</sub>), 1.34 (d, 12H, <sup>3</sup>J<sub>H-H</sub> = 5.6 Hz, CHMe<sub>2</sub>), 1.14 (d, 12H, <sup>3</sup>J<sub>H-H</sub> = 6 Hz, CHMe<sub>2</sub>), 0.27 (s, 3H, Me), -0.14 (br, 12H, [AlMe<sub>4</sub>]<sup>-</sup>). <sup>13</sup>C{<sup>1</sup>H} NMR (100 MHz, C<sub>6</sub>D<sub>6</sub>, 25 °C): δ (ppm) = 164.1 (s, NCN), 142.3 (s, Ar), 142.2 (s, Ar), 136.2 (s, Ar), 128.9 (s, Ar), 128.7 (s, Ar), 125.2 (s, Ar), 124.6 (s, Ar), 51.8 (s, CH<sub>2</sub>Ph), 28.6 (s, CHMe<sub>2</sub>), 27.0 (s, CHMe<sub>2</sub>), 26.5 (s, Me), 23.8 (s, CHMe<sub>2</sub>), 3.8 (s, [AlMe<sub>4</sub>]<sup>-</sup>). Anal. Calcd for C<sub>44</sub>H<sub>63</sub>AlYN<sub>3</sub>(%): C, 70.47; H, 8.47; N, 5.60; Found C, 70.25; H, 8.15; N, 5.49.**

**[(PhCH<sub>2</sub>)<sub>2</sub>NC(NC<sub>6</sub>H<sub>3</sub><sup>i</sup>Pr<sub>2</sub>-2,6)<sub>2</sub>]<sub>2</sub>Y<sub>2</sub>(μ<sub>2</sub>-SPh)(AlMe<sub>3</sub>)<sub>2</sub>(μ<sub>4</sub>-CH) (3).** A toluene solution (5 mL) of phenyl disulfide (0.06 g, 0.3 mmol) was added dropwise to a stirring toluene solution (15 mL) of complex **1** (0.44 g, 0.3 mmol). And the reaction mixture was left to stir for 18 hours at 40 °C. A colour change of the solution was observed from colourless to yellow. The toluene solvent was removed under vacuum and wash the reaction mixture with hexane for twice to obtain complex **3** as powder. Colourless crystalline **3** was harvested by recrystallization in toluene at ambient temperature, yield (0.40 g, 86%). <sup>1</sup>H NMR (400 MHz, C<sub>6</sub>D<sub>6</sub>, 25 °C): δ (ppm) = 7.06 (m, 8H, Ar), 6.98-6.94 (m, 4H, Ar), 6.91-6.90 (m, 12H, Ar), 6.79 (br, 9H, Ar), 6.65 (t, <sup>3</sup>J<sub>H-H</sub> = 8 Hz, 2H, Ar), 5.91 (d, <sup>3</sup>J<sub>H-H</sub> = 8 Hz, 2H, Ar), 4.13 (s, 8H, CH<sub>2</sub>Ph), 3.83 (m, 8H, CHMe<sub>2</sub>), 2.00 (s, 1H, μ<sub>4</sub>-CH), 1.44 (d, <sup>3</sup>J<sub>H-H</sub> = 8 Hz, 24H, CHMe<sub>2</sub>), 1.18 (d, <sup>3</sup>J<sub>H-H</sub> = 8 Hz, 24H, CHMe<sub>2</sub>), 0.89 (br, 12H, (μ<sub>2</sub>-Me)<sub>2</sub>AlMe), -0.50 (br, 6H, (μ<sub>2</sub>-Me)<sub>2</sub>AlMe). <sup>1</sup>H NMR (500 MHz, C<sub>6</sub>D<sub>6</sub>, 60 °C): δ (ppm) = 7.05 (br, 4H, Ar), 7.03 (s, 4H, Ar), 6.96-6.93 (m, 4H, Ar), 6.91-6.89 (m, 12H, Ar), 6.78-6.74 (m, 9H, Ar), 6.62 (t, <sup>3</sup>J<sub>H-H</sub> = 8 Hz, 2H, Ar), 5.96 (d, <sup>3</sup>J<sub>H-H</sub> = 8 Hz, 2H, Ar), 4.14 (s, 8H, CH<sub>2</sub>Ph), 3.81 (m, 8H, CHMe<sub>2</sub>), 2.00 (s, 1H, μ<sub>4</sub>-CH), 1.42 (d, <sup>3</sup>J<sub>H-H</sub> = 8 Hz, 24H, CHMe<sub>2</sub>), 1.18 (d, <sup>3</sup>J<sub>H-H</sub> = 8 Hz, 24H, CHMe<sub>2</sub>), 0.51 (br, 18H, AlMe<sub>3</sub>). <sup>13</sup>C{<sup>1</sup>H} NMR (100 MHz, C<sub>6</sub>D<sub>6</sub>, 25 °C): δ (ppm) = 165.6 (s, NCN), 143.2 (s, Ar), 142.8 (s, Ar), 137.0 (s, Ar), 136.5 (s, Ar), 131.7 (s, Ar), 129.6 (s, Ar), 129.3 (s, Ar), 128.1 (s, Ar), 127.5 (s, Ar), 125.0 (s, Ar), 124.5 (s, Ar), 124.1 (s, Ar), 91.4 (s, μ<sub>4</sub>-CH), 52.4 (s, CH<sub>2</sub>Ph), 28.7 (s, CHMe<sub>2</sub>), 26.8 (s, CHMe<sub>2</sub>), 25.5 (s, CHMe<sub>2</sub>), 9.7 (s, AlMe<sub>3</sub>). Anal. Calcd for C<sub>91</sub>H<sub>120</sub>Al<sub>2</sub>N<sub>6</sub>SY<sub>2</sub>(%): C, 69.98; H, 7.74; N, 5.38; Found: C, 70.37; H, 7.35; N, 5.19.

**[(PhCH<sub>2</sub>)<sub>2</sub>NC(NC<sub>6</sub>H<sub>3</sub><sup>i</sup>Pr<sub>2</sub>-2,6)<sub>2</sub>]<sub>2</sub>Y<sub>2</sub>[μ<sub>3</sub>-η<sup>5</sup>:η<sup>2</sup>:η<sup>1</sup>-HC(CPhN)<sub>2</sub>](AlMe<sub>3</sub>)(μ<sub>2</sub>-Me) (4).** A toluene solution (5 mL) of benzonitrile (70 μL 0.6 mmol) was added dropwise to a stirring toluene solution (15 mL) of complex **1** (0.44 g, 0.3 mmol). And the reaction mixture was left to stir for 12 hours at room temperature. The toluene solvent was removed under vacuum and wash the reaction mixture with hexane for three times to obtain complex **4** as red powder. Red crystalline **4** was harvested by recrystallization in toluene at ambient temperature, yield (0.44 g, 92%). <sup>1</sup>H NMR (400 MHz, C<sub>6</sub>D<sub>6</sub>, 25 °C): δ (ppm) = 8.15 (d, <sup>3</sup>J<sub>H-H</sub> = 8 Hz, 2H, Ar), 7.41 (m, 2H, Ar), 7.31 (m, 1H, Ar), 7.24-7.22 (m, 2H, Ar), 7.13-6.96 (m, 19H, Ar and CH), 6.88-6.87 (m, 10H, Ar), 6.63-6.61 (m, 7H, Ar), 4.34 (s, 2H, CH<sub>2</sub>Ph), 4.30 (s, 2H, CH<sub>2</sub>Ph), 3.91 (s, 2H, CH<sub>2</sub>Ph), 3.87 (s, 2H, CH<sub>2</sub>Ph), 3.79-3.72 (m, 8H, CHMe<sub>2</sub>), 1.27 (d, <sup>3</sup>J<sub>H-H</sub> = 8 Hz, 12H, CHMe<sub>2</sub>), 1.21 (d, <sup>3</sup>J<sub>H-H</sub> = 8 Hz, 12H, CHMe<sub>2</sub>), 1.13 (d, <sup>3</sup>J<sub>H-H</sub> = 4 Hz, 12H, CHMe<sub>2</sub>), 1.03 (d, <sup>3</sup>J<sub>H-H</sub> = 8 Hz, 12H, CHMe<sub>2</sub>), 0.65 (s, 3H, μ<sub>2</sub>-Me), -0.46 (s, 9H, AlMe<sub>3</sub>). <sup>13</sup>C{<sup>1</sup>H} NMR (100 MHz, C<sub>6</sub>D<sub>6</sub>, 25 °C): δ (ppm) = 177.2 (s, HC(CPhN)<sub>2</sub>), 170.3 (s, HC(CPhN)<sub>2</sub>), 165.1 (s, NCN), 145.0 (s, Ar), 143.6 (s, Ar), 142.0 (s, Ar), 141.6 (s, Ar), 140.8 (s, Ar), 136.2 (s, Ar), 130.1 (s, Ar), 129.0 (s, Ar), 128.2 (s, Ar), 127.0 (s, Ar), 126.8 (s, Ar), 125.3 (s, Ar), 124.1 (s, Ar), 124.0 (s, Ar), 123.7 (s, Ar), 96.5 (s, HC(CPhN)<sub>2</sub>), 52.4 (s, CH<sub>2</sub>Ph), 29.8 (s, μ<sub>2</sub>-Me), 28.1 (s, CHMe<sub>2</sub>), 27.8 (s, CHMe<sub>2</sub>), 26.5 (s, CHMe<sub>2</sub>), 26.1 (s, CHMe<sub>2</sub>), 24.0 (s, CHMe<sub>2</sub>), 23.5 (s, CHMe<sub>2</sub>), 0.3 (s, AlMe<sub>3</sub>). Anal. Calcd for C<sub>97</sub>H<sub>116</sub>AlN<sub>8</sub>Y<sub>2</sub>(%): C, 72.87; H, 7.31; N, 7.01; Found: C, 72.47; H, 7.25; N, 7.11.

**[(PhCH<sub>2</sub>)<sub>2</sub>NC(NC<sub>6</sub>H<sub>3</sub><sup>i</sup>Pr<sub>2</sub>-2,6)<sub>2</sub>]<sub>2</sub>Y<sub>2</sub>(AlMe<sub>3</sub>)<sub>2</sub>(μ<sub>2</sub>-SMe)(μ<sub>5</sub>-C)(AlMe<sub>2</sub>) (5).** A toluene solution (5 mL) of sulfur (0.01 g, 0.3 mmol) was added dropwise to a stirring toluene solution (15 mL) of complex **1** (0.44 g, 0.3 mmol). And the reaction mixture was left to stir for 24 hours at room temperature. The toluene solvent and volatile substances were removed under vacuum and wash the reaction mixture with hexane for three times to obtain complex **5** as white powder. Colourless crystalline **5** was harvested by recrystallization in toluene at ambient temperature, yield (0.19 g, 42%). <sup>1</sup>H

NMR (400 MHz, C<sub>6</sub>D<sub>6</sub>, 25 °C):  $\delta$  (ppm) = 7.03 (m, 7H, Ar), 6.94-6.96 (d,  $^3J_{\text{H-H}} = 8$  Hz, 4H, Ar), 6.83-6.81 (m, 14H, Ar), 6.43-6.41 (m, 7H, Ar), 4.18(s, 8H, CH<sub>2</sub>Ph), 3.82-3.74(m, 8H, CHMe<sub>2</sub>), 1.46 (d,  $^3J_{\text{H-H}} = 8$  Hz, 24H, CHMe<sub>2</sub>), 1.30 (d,  $^3J_{\text{H-H}} = 4$  Hz, 12H, CHMe<sub>2</sub>), 1.20 (d,  $^3J_{\text{H-H}} = 8$  Hz, 12H, -CHMe<sub>2</sub>), 0.81 (s, 12H, ( $\mu_2$ -Me)<sub>2</sub>AlMe), 0.80 (s, 3H,  $\mu_2$ -SMe), -0.05 (s, 6H, ( $\mu_2$ -Me)<sub>2</sub>AlMe), -0.84 (s, 6H, -CAI Me<sub>2</sub>). <sup>13</sup>C{<sup>1</sup>H} NMR (100 MHz, C<sub>6</sub>D<sub>6</sub>, 25 °C):  $\delta$  (ppm) = 167.8 (s, NCN), 144.4 (s, Ar), 143.4 (s, Ar), 143.0 (s, Ar), 141.8 (s, Ar), 136.2 (s, Ar), 129.4 (s, Ar), 127.1 (s, Ar), 125.2 (s, Ar), 125.0 (s, Ar), 124.6 (s, Ar), 124.3 (s, Ar), 53.0 (s, CH<sub>2</sub>Ph), 28.6 (s, CHMe<sub>2</sub>), 28.4 (s, CHMe<sub>2</sub>), 28.3 (s, CHMe<sub>2</sub>), 26.7 (s, CHMe<sub>2</sub>), 24.9 (s, CHMe<sub>2</sub>), 24.7 (s, CHMe<sub>2</sub>), 10.8 (s, AlMe<sub>3</sub>), 6.5 (s,  $\mu_2$ -SMe), -0.8 (s,  $\mu_4$ -CAI Me<sub>2</sub>). Anal. Calcd for C<sub>88</sub>H<sub>123</sub>Al<sub>3</sub>N<sub>6</sub>SY<sub>2</sub>(%): C, 67.94; H, 7.97; N, 5.40; Found: C, 67.57; H, 7.67; N, 5.41.

**[(PhCH<sub>2</sub>)<sub>2</sub>NC(NC<sub>6</sub>H<sub>3</sub>Pr<sub>2</sub>-2,6)<sub>2</sub>Y(AlMe<sub>4</sub>)<sub>2</sub> (6)**. A toluene solution (5 mL) of sulfur (0.01 g, 0.3 mmol) was added dropwise to a stirring toluene solution (15 mL) of complex **1** (0.44 g, 0.3 mmol). And the reaction mixture was left to stir for 24 hours at room temperature. The toluene solvent and volatile substances were removed under vacuum and wash the reaction mixture with hexane for three times to obtain complex **5** as white powder. And then, the colorless crystal **6** was obtained from the residual solution at -35 °C for overnight (0.05 g, 11%). <sup>1</sup>H NMR (400 MHz, C<sub>6</sub>D<sub>6</sub>, 25 °C):  $\delta$  (ppm) = 7.01-6.98 (m, 6H, Ar), 6.87-6.85 (m, 6H, Ar), 6.61-6.60 (m, 4H, Ar), 4.04 (s, 4H, CH<sub>2</sub>C<sub>6</sub>H<sub>5</sub>), 3.66 (m, 4H, CHMe<sub>2</sub>), 1.36 (d, 12H,  $^3J_{\text{H-H}} = 8$  Hz, CHMe<sub>2</sub>), 1.10 (d, 12H,  $^3J_{\text{H-H}} = 8$  Hz, CHMe<sub>2</sub>), 0.04 (s, 24H, [AlMe<sub>4</sub>]). <sup>13</sup>C{<sup>1</sup>H} NMR (100 MHz, C<sub>6</sub>D<sub>6</sub>, 25 °C):  $\delta$  (ppm) = 167.0 ppm (s, NCN). 143.1 (s, Ar), 142.0 (s, Ar), 135.4 (s, Ar), 129.7 (s, Ar), 127.8 (s, Ar), 125.9 (s, Ar), 125.2 (s, Ar), 52.6 (s, CH<sub>2</sub>Ph), 28.4 (s, CHMe<sub>2</sub>), 27.0 (s, CHMe<sub>2</sub>), 25.5 (s, CHMe<sub>2</sub>), 2.5 (s, [AlMe<sub>4</sub>]). Anal. Calcd for C<sub>47</sub>H<sub>72</sub>Al<sub>2</sub>N<sub>3</sub>Y (%): C, 68.68; H, 8.83; N, 5.11; Found C, 68.77; H, 8.50; N, 5.42.

**[(PhCH<sub>2</sub>)<sub>2</sub>NC(NC<sub>6</sub>H<sub>3</sub>Pr<sub>2</sub>-2,6)<sub>2</sub>Y<sub>2</sub>( $\mu_3$ - $\eta^1$ : $\eta^1$ : $\eta^2$ -CCNPh)(AlMe<sub>3</sub>)<sub>2</sub>( $\mu_3$ -S) (7)**. A toluene solution (5 mL) of phenyl isothiocyanate (35  $\mu$ L, 0.3 mmol) was added dropwise to a stirring toluene solution (15 mL) of complex **1** (0.44 g, 0.3 mmol). And the reaction mixture was left to stir for 1 hour at 10 °C. Instant colour change from colourless to yellow was observed. The toluene solvent and volatile substances were removed under vacuum and wash the reaction mixture with hexane for three times to obtain complex **7** as white powder. Colourless crystalline **7** was harvested by recrystallization in toluene at ambient temperature, yield (0.30 g, 64%). <sup>1</sup>H NMR (400 MHz, C<sub>6</sub>D<sub>6</sub>, 25 °C):  $\delta$  (ppm) = 7.60-7.55 (m, 2H, Ar), 7.26 (t,  $^3J_{\text{H-H}} = 8$  Hz, 2H, Ar), 7.13-7.02 (m, 14H, Ar), 6.89 (br s, 14H, Ar), 6.72-6.62 (m, 8H, Ar), 4.17-4.04(m, 8H, CH<sub>2</sub>Ph), 3.88-3.74(m, 8H, CHMe<sub>2</sub>), 1.45-0.78 (m, 48H, CHMe<sub>2</sub>), 0.16 (s, 9H, SAlMe<sub>3</sub>), -0.12 (br, 9H, CAI Me<sub>3</sub>). <sup>13</sup>C{<sup>1</sup>H} NMR (100 MHz, C<sub>6</sub>D<sub>6</sub>, 25 °C):  $\delta$  (ppm) = 164.3 (s, NCN), 146.9 (s, Ar), 143.5 (s, Ar), 142.4 (s, Ar), 140.8 (s, Ar), 136.0 (s, CCNPh), 129.5 (s, Ar), 129.3 (s, Ar), 129.1 (s, Ar), 127.5 (s, Ar), 125.7 (s, Ar), 125.1 (s, Ar), 124.8 (s, Ar), 122.0 (s, Ar), 121.0 (s, Ar), 91.3 (d,  $J = 21$  Hz, CCNPh), 52.2 (s, CH<sub>2</sub>Ph), 28.7 (s, CHMe<sub>2</sub>), 27.4 (s, CHMe<sub>2</sub>), 25.3 (s, CHMe<sub>2</sub>), 23.8 (s, CHMe<sub>2</sub>), 21.5 (s, CHMe<sub>2</sub>), 1.4 (s, SAlMe<sub>3</sub>), -1.7 (s, CAI Me<sub>3</sub>). Anal. Calcd for C<sub>92</sub>H<sub>119</sub>Al<sub>2</sub>N<sub>7</sub>SY<sub>2</sub>(%): C, 69.64; H, 7.56; N, 6.18; Found: C, 70.01; H, 7.25; N, 6.09.

**{[(PhCH<sub>2</sub>)<sub>2</sub>NC(NC<sub>6</sub>H<sub>3</sub>Pr<sub>2</sub>-2,6)<sub>2</sub>Y( $\mu_3$ -O)(AlMe<sub>3</sub>)<sub>2</sub> (8)**. A toluene (15 mL) solution of complex **1** (0.44 g, 0.3 mmol) was placed in a tube with a Teflon stopcock and degassed by a freeze pump thaw cycle. The CO (1 atm) was introduced into the tube and the solution was left to stir for 18 hours at 50 °C. Colour change from colourless to dark brown was observed. The toluene solvent was removed under reduced pressure to saturation. Colorless crystals of **8** (0.37 g, 84%) were

harvested after the solution stood at ambient temperature after two days.  $^1\text{H}$  NMR (400 MHz,  $\text{C}_6\text{D}_6$ , 25 °C):  $\delta$  (ppm) = 7.08-7.02 (m, 12H, Ar), 6.91-6.89 (m, 12H, Ar), 6.72-6.70 (m, 12H, Ar), 3.98 (s, 8H,  $\text{CH}_2\text{Ph}$ ), 3.73 (m, 8H,  $\text{CHMe}_2$ ), 1.29 (d,  $^3J_{\text{H-H}} = 8$  Hz, 24H,  $\text{CHMe}_2$ ), 1.14 (d,  $^3J_{\text{H-H}} = 8$  Hz, 24H,  $\text{CHMe}_2$ ), -0.16 (s, 18H,  $\text{AlMe}_3$ ).  $^{13}\text{C}\{^1\text{H}\}$  NMR (100 MHz,  $\text{C}_6\text{D}_6$ , 25 °C):  $\delta$  (ppm) = 165.5 (s, NCN), 143.5 (s, Ar), 142.6 (s, Ar), 136.4 (s, Ar), 129.2 (s, Ar), 127.4 (s, Ar), 124.7 (s, Ar), 124.4 (s, Ar), 124.4 (s, Ar), 51.9 (s,  $\text{CH}_2\text{Ph}$ ), 28.5 (s,  $\text{CHMe}_2$ ), 27.1 (s,  $\text{CHMe}_2$ ), 23.5 (s,  $\text{CHMe}_2$ ), -2.6 (s,  $\text{AlMe}_3$ ). Anal. Calcd for  $\text{C}_{84}\text{H}_{114}\text{Al}_2\text{N}_6\text{O}_2\text{Y}_2(\%)$ : C, 68.56; H, 7.81; N, 5.71; Found: C, 68.83; H, 7.80; N, 5.71.

**[[PhCH<sub>2</sub>]<sub>2</sub>NC(NC<sub>6</sub>H<sub>3</sub>Pr<sub>2</sub>-2,6)]<sub>2</sub>Y<sub>2</sub>( $\mu_4$ -O)(AlMe<sub>3</sub>)<sub>2</sub>( $\mu_2$ -Me)( $\mu_2$ -C $\equiv$ CH) (9).** A toluene solution (15 mL) of complex **1** (0.44 g, 0.3 mmol) was placed in a tube with a Teflon stopcock and degassed by a freeze pump thaw cycle. The CO (1 atm) was introduced into the tube and the solution was left to stir for 6 hours at 10 °C. Colour change from colourless to yellow was observed. The toluene solvent was removed under reduced pressure to saturation. Colorless crystals of **9** were harvested after the solution stood at ambient temperature, yield (0.31 g, 70%).  $^1\text{H}$  NMR (400 MHz,  $\text{C}_6\text{D}_6$ , 25 °C):  $\delta$  (ppm) = 7.09-7.04 (m, 12H, Ar), 6.89 (br, 12H, Ar), 6.70 (br, 8H, Ar), 6.89 (br, 14H, Ar), 4.09 (br, 8H,  $\text{CH}_2\text{Ph}$ ), 3.79 (m, 8H,  $\text{CHMe}_2$ ), 1.80 (s, 1H,  $\mu_2$ -C $\equiv$ CH), 1.46-1.37(m, 24,  $\text{CHMe}_2$ ), 1.14 (br, 24H,  $\text{CHMe}_2$ ), 0.44 (br, 3H,  $\mu_2$ -Me), -0.19(br, 18H,  $\text{AlMe}_3$ ).  $^{13}\text{C}\{^1\text{H}\}$  NMR (100 MHz,  $\text{C}_6\text{D}_6$ , 25 °C):  $\delta$  (ppm) = 166.4 (s, NCN), 143.2 (s, Ar), 142.9 (s, Ar), 136.3 (s, Ar), 129.2 (s, Ar), 127.4 (s, Ar), 124.9 (s, Ar), 124.8 (s, Ar), 124.7 (s, Ar), 112.4 (s,  $\mu_2$ -C $\equiv$ CH), 52.1 (s,  $\text{CH}_2\text{Ph}$ ), 35.2 (s,  $\mu_2$ -Me), 28.5 (s,  $\text{CHMe}_2$ ), 27.1 (br,  $\text{CHMe}_2$ ), 25.0 (br,  $\text{CHMe}_2$ ), 7.8 (s,  $\text{AlMe}_3$ ). Anal. Calcd for  $\text{C}_{87}\text{H}_{118}\text{Al}_2\text{N}_6\text{OY}_2(\%)$ : C, 69.86; H, 7.95; N, 5.62; Found: C, 70.21; H, 8.25; N, 5.67.

## NMR spectra of all complexes

The solid samples were dissolved in  $C_6D_6$ , and then transferred into a J-Young NMR tube in the glove-box. The  $^1H$  NMR and  $^{13}C\{^1H\}$  NMR spectra were recorded on a JEOL ECA-400 NMR spectrometer (FT, 400 MHz for  $^1H$ ; 100 MHz for  $^{13}C\{^1H\}$ ) in  $C_6D_6$  at room temperature (except for Fig. S7).

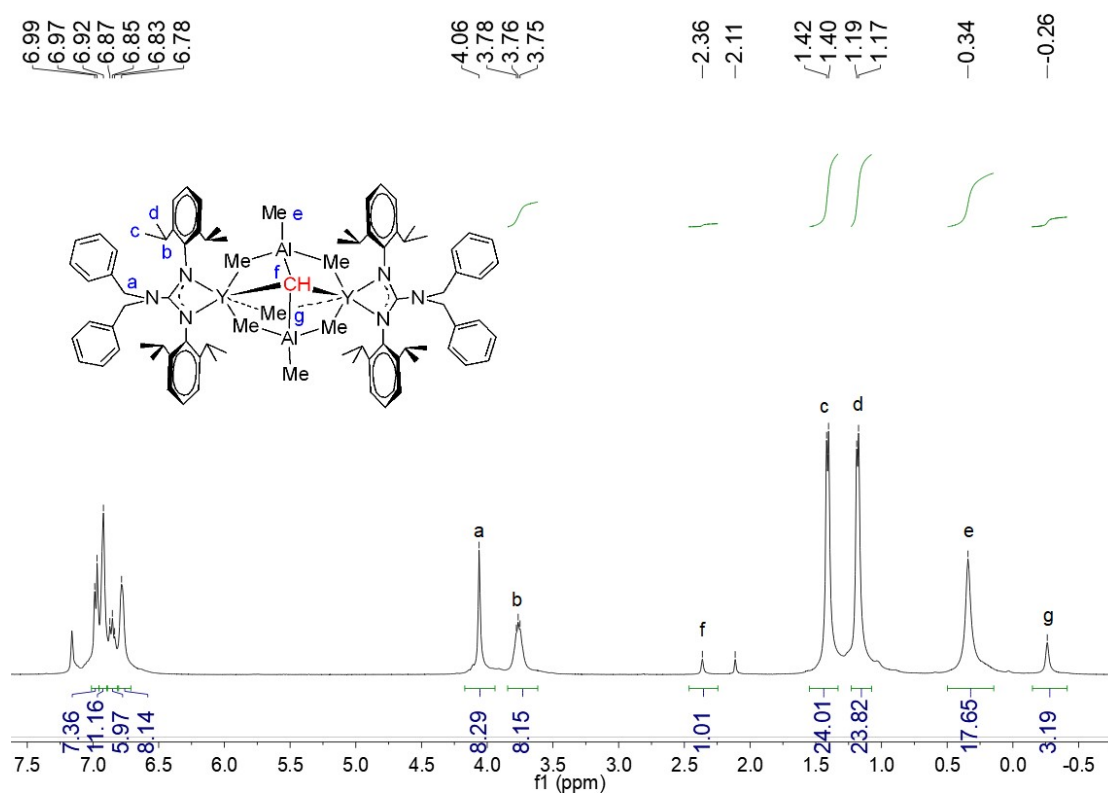

**Fig. S1**  $^1H$  NMR spectrum of **1** obtained in  $C_6D_6$  at room temperature.

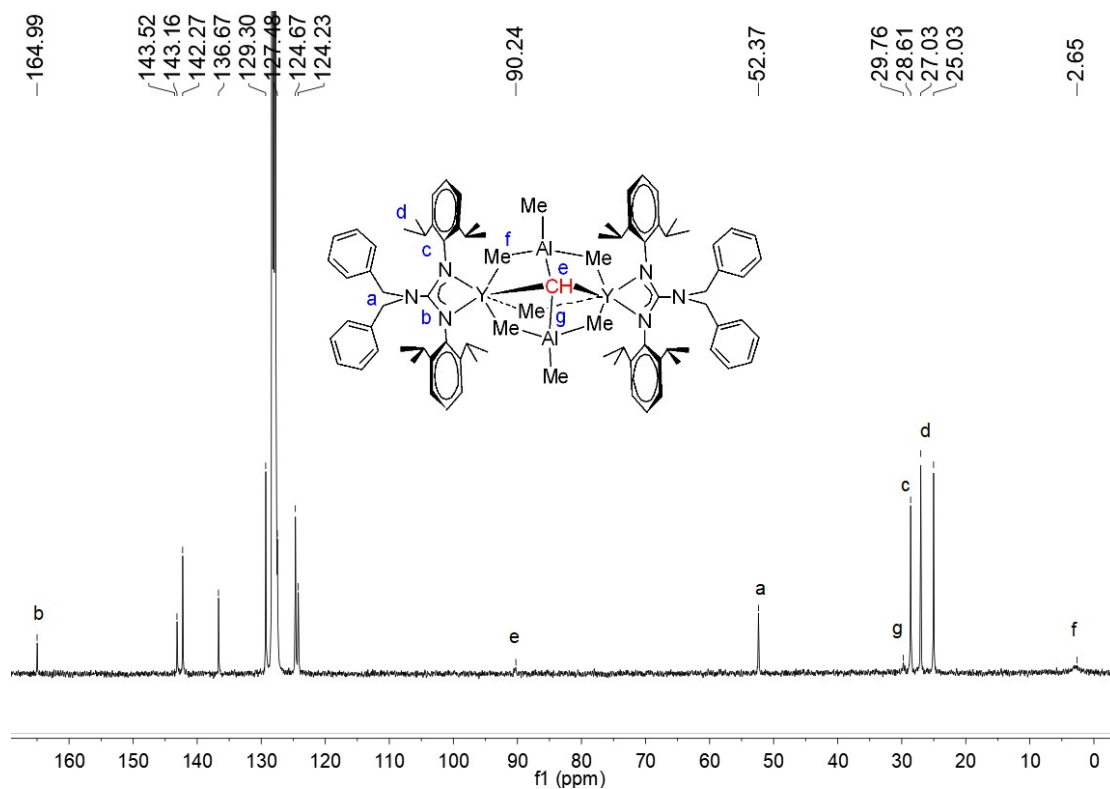

Fig. S2  $^{13}\text{C}\{^1\text{H}\}$  NMR spectrum of 1 obtained in  $\text{C}_6\text{D}_6$  at room temperature.

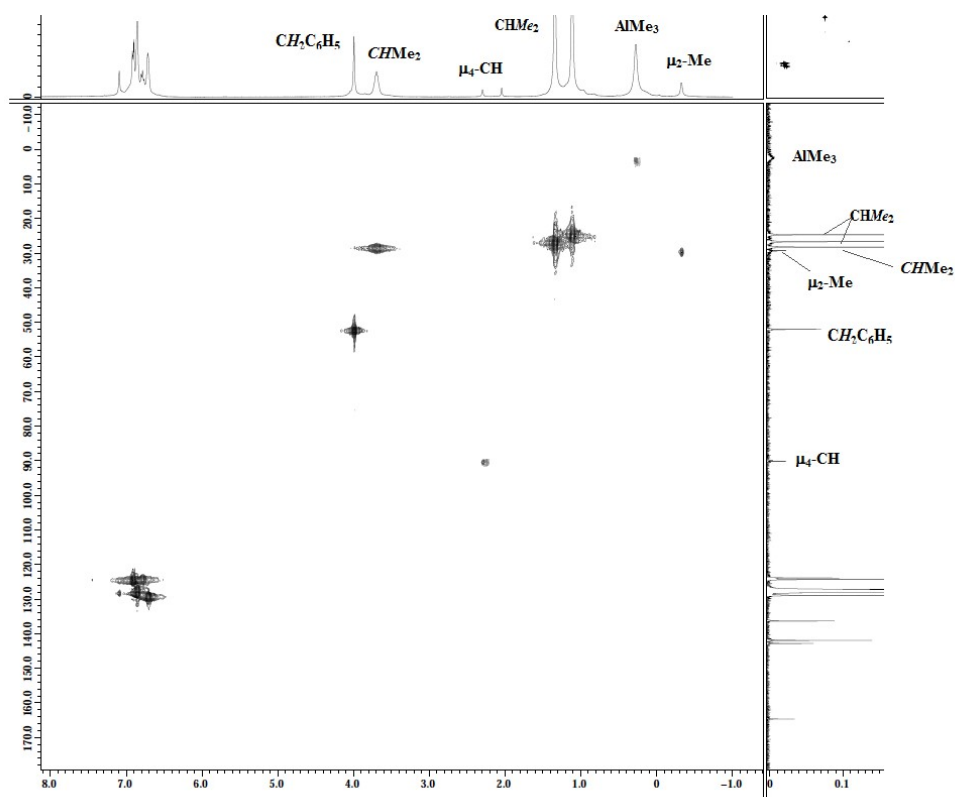

Fig. S3 Two-dimensional  $^1\text{H}$ - $^{13}\text{C}$  HMQC NMR spectrum of complex 1 ( $^1\text{H}$  NMR spectrum (400 MHz) on the top,  $^{13}\text{C}\{^1\text{H}\}$  NMR spectrum (100 MHz) on the right).

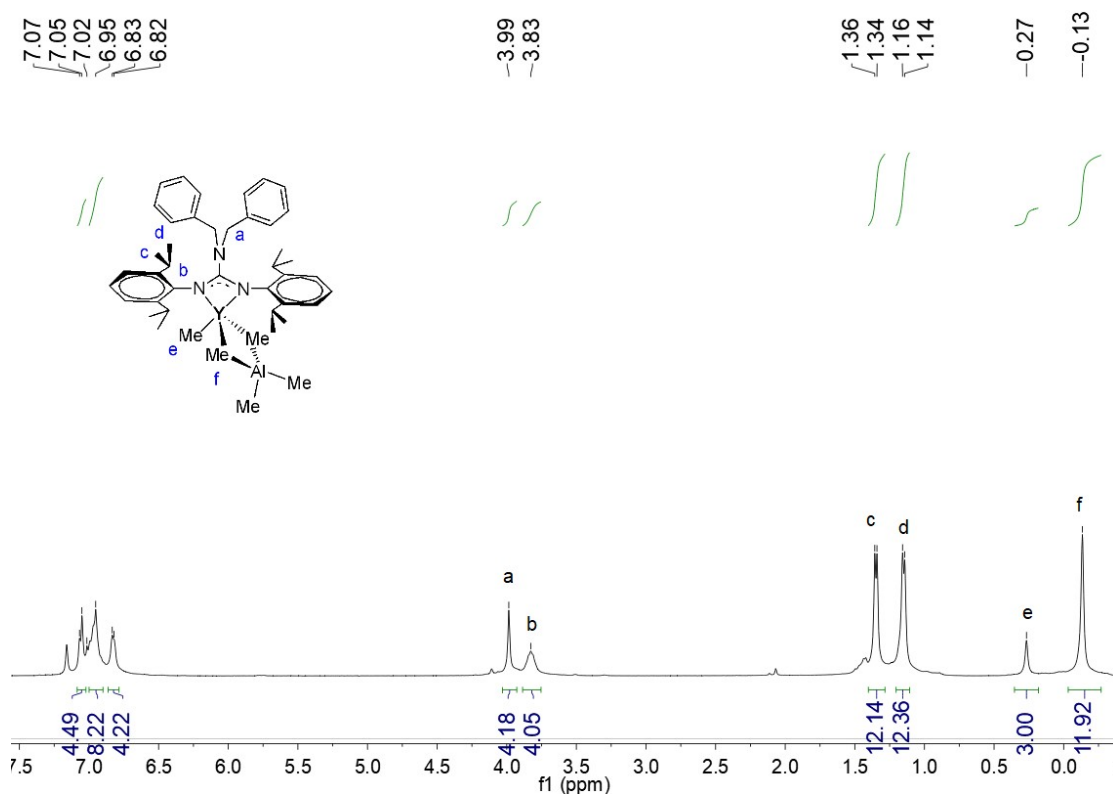

**Fig. S4** <sup>1</sup>H NMR spectrum of **2** obtained in C<sub>6</sub>D<sub>6</sub> at room temperature.

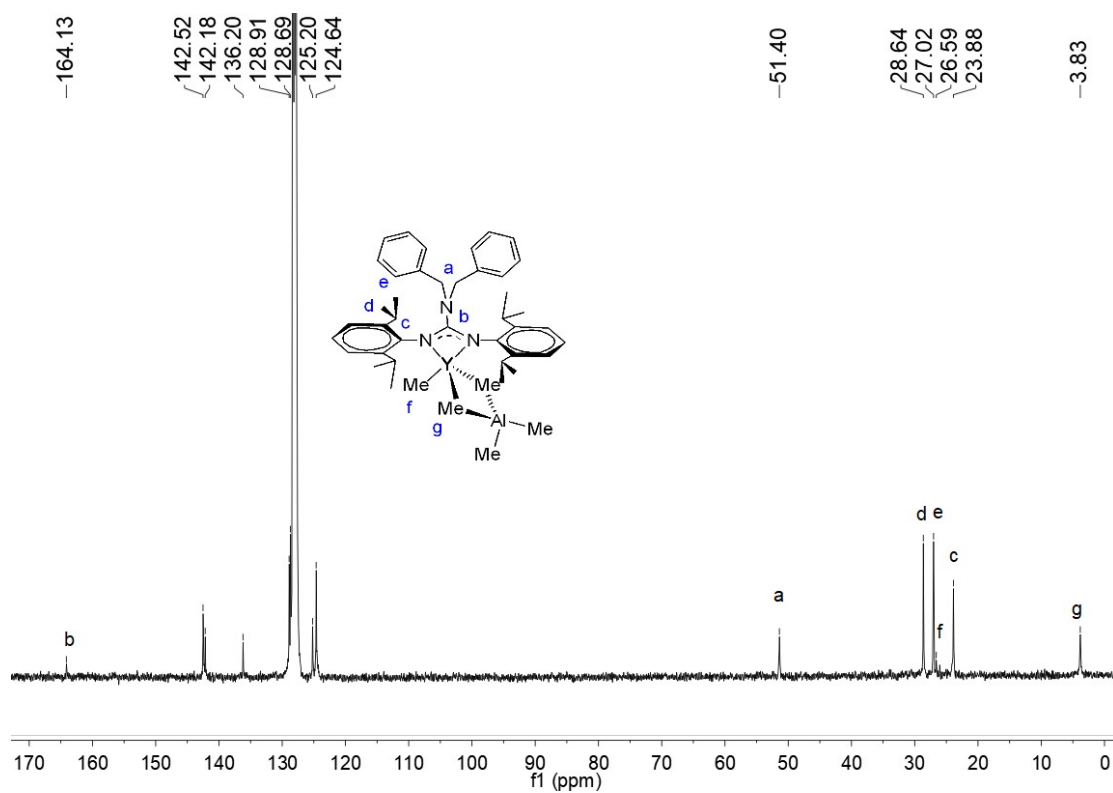

**Fig. S5** <sup>13</sup>C{<sup>1</sup>H} NMR spectrum of **2** obtained in C<sub>6</sub>D<sub>6</sub> at room temperature.



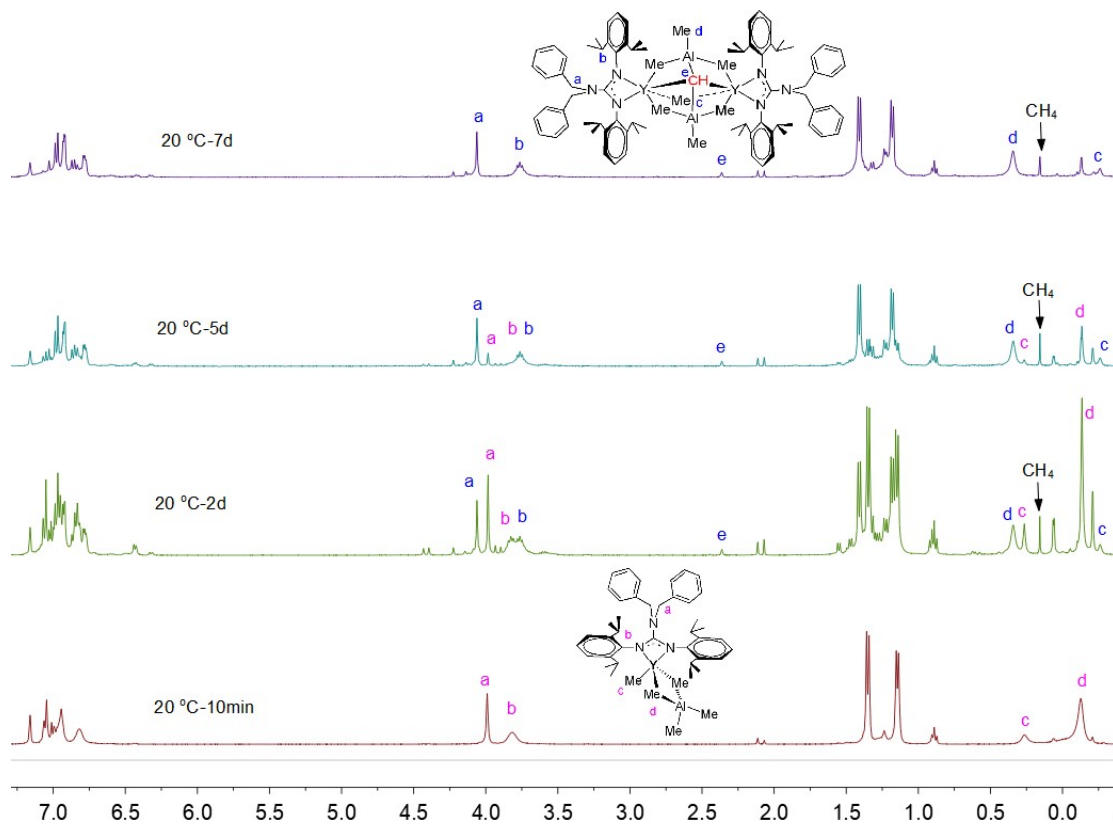

**Fig. S6** The *in situ*  $^1\text{H}$  NMR spectrum was carried out on conversion of complex **1** from complex **2** in  $\text{C}_6\text{D}_6$  at room temperature.

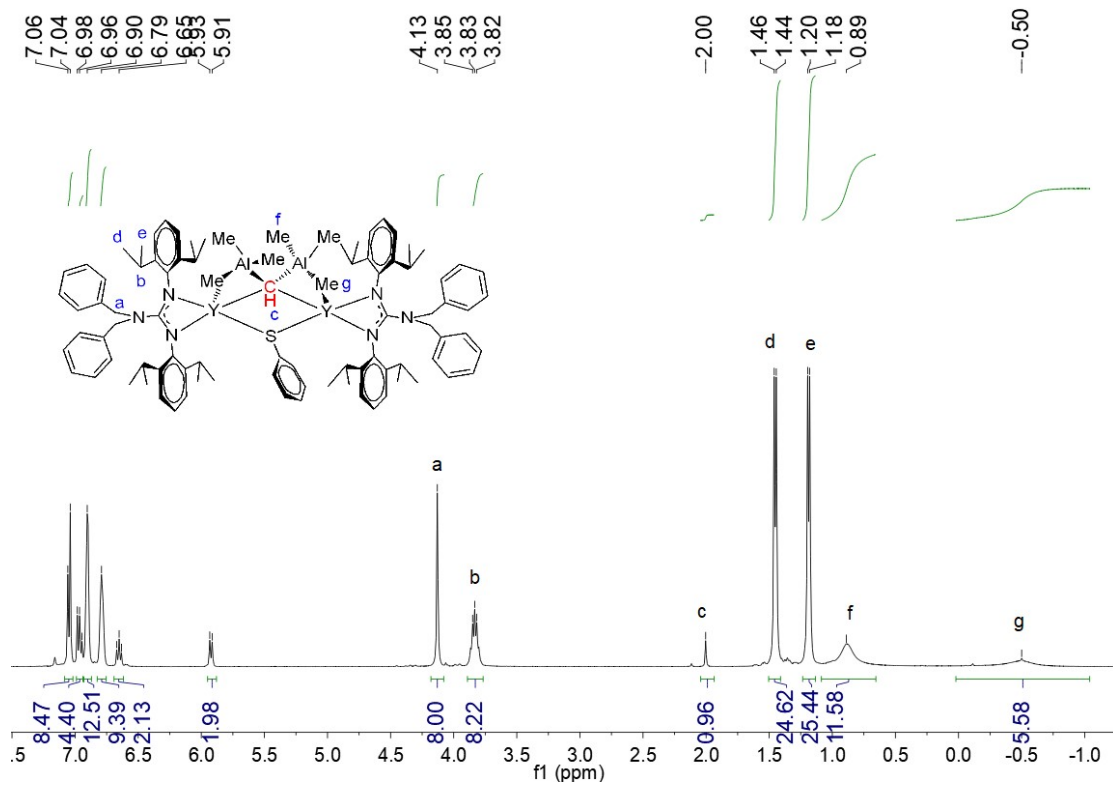

**Fig. S7**  $^1\text{H}$  NMR spectrum of **3** obtained in  $\text{C}_6\text{D}_6$  at room temperature.

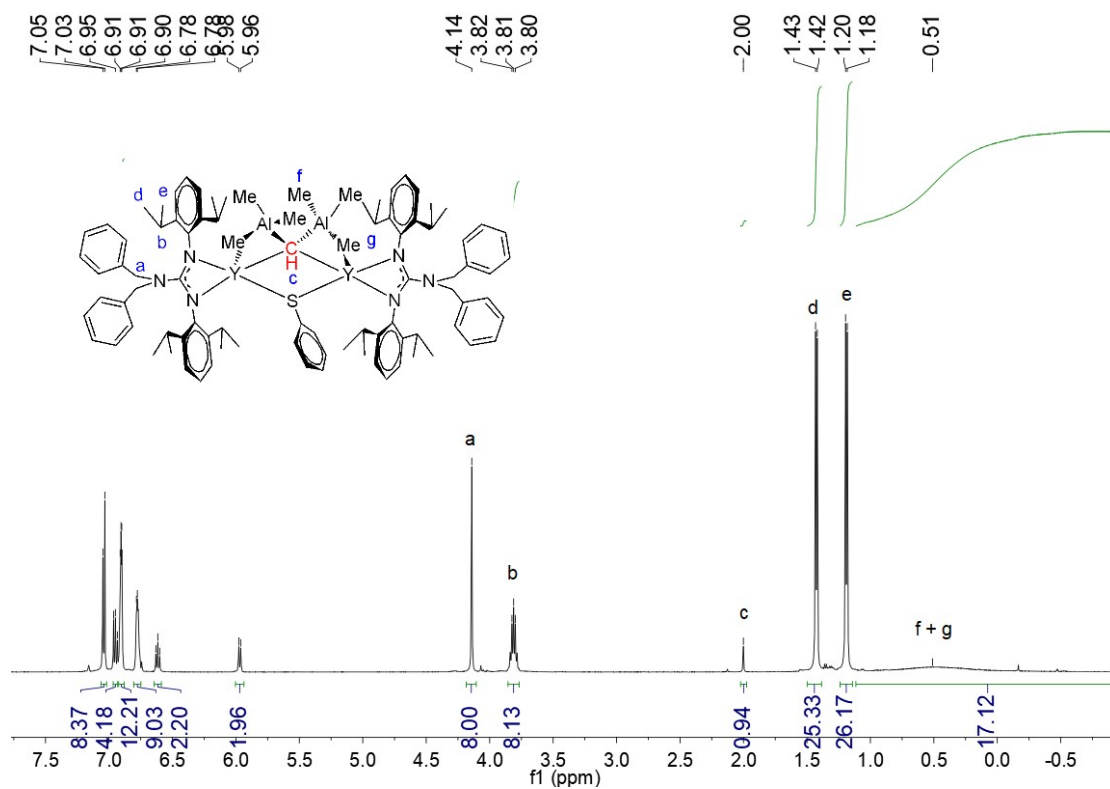

**Fig. S8**  $^1\text{H}$  NMR spectrum of **3** obtained in  $\text{C}_6\text{D}_6$  at 60  $^\circ\text{C}$ .

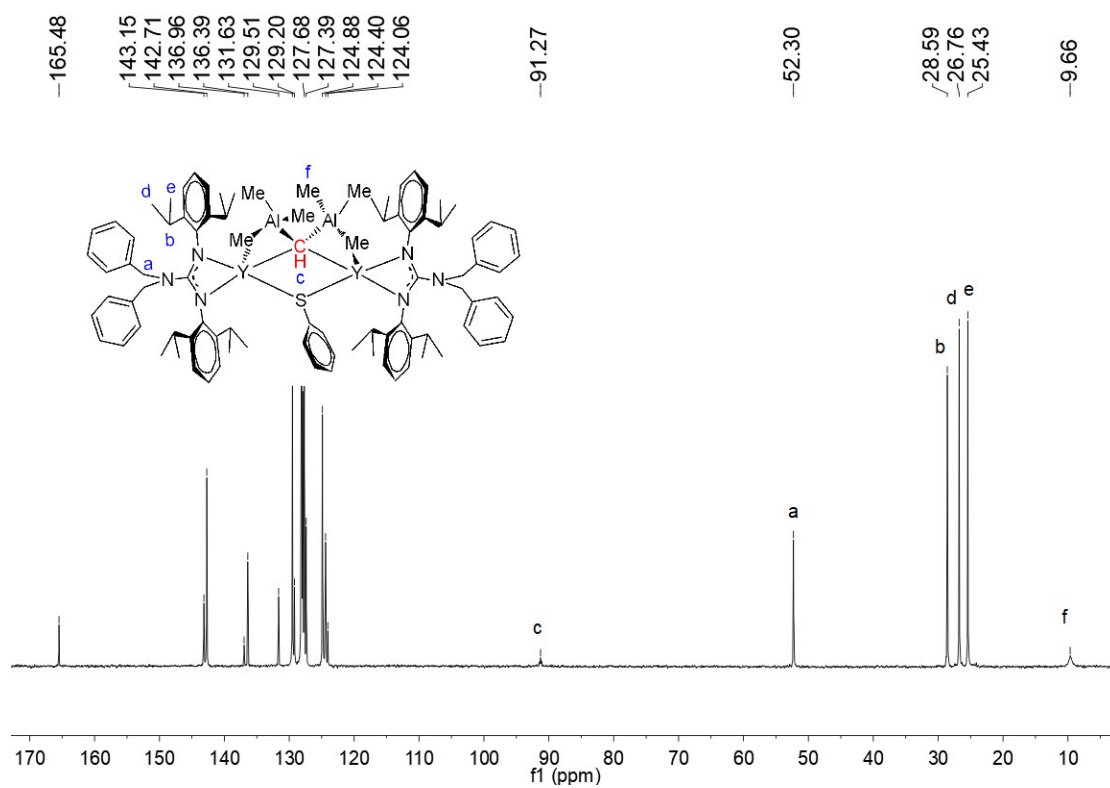

**Fig. S9**  $^{13}\text{C}\{^1\text{H}\}$  NMR spectrum of **3** obtained in  $\text{C}_6\text{D}_6$  at room temperature.

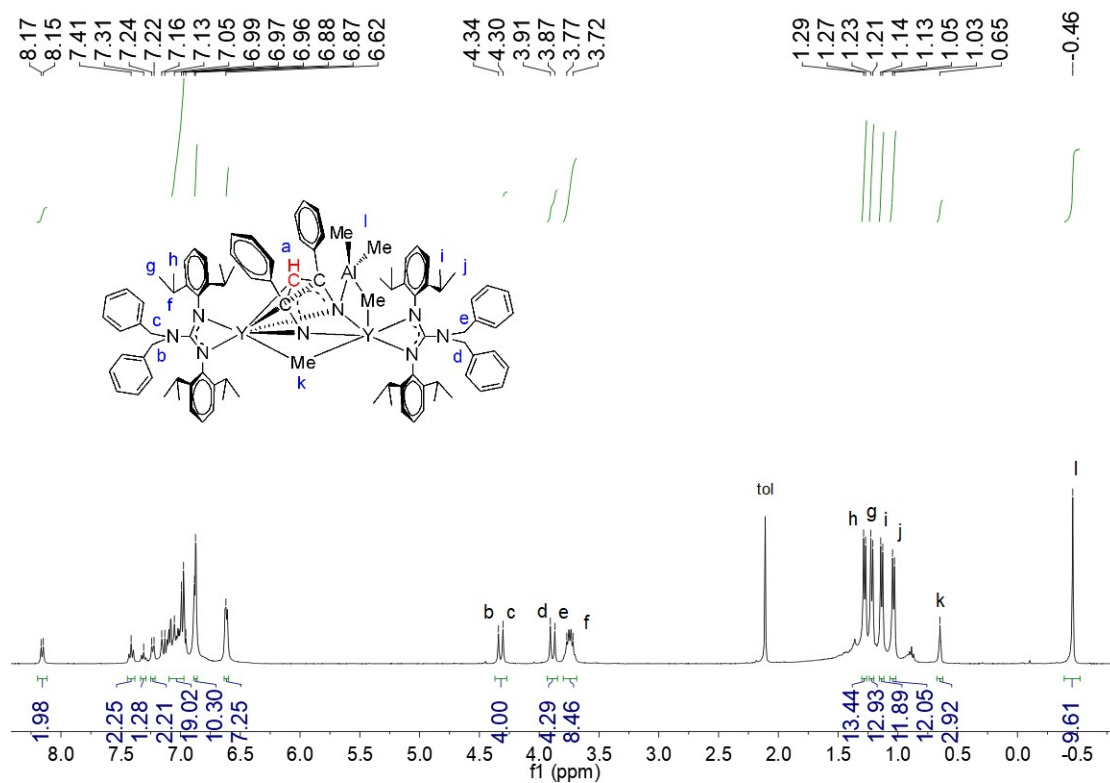

**Fig. S10** <sup>1</sup>H NMR spectrum of **4** obtained in C<sub>6</sub>D<sub>6</sub> at room temperature.

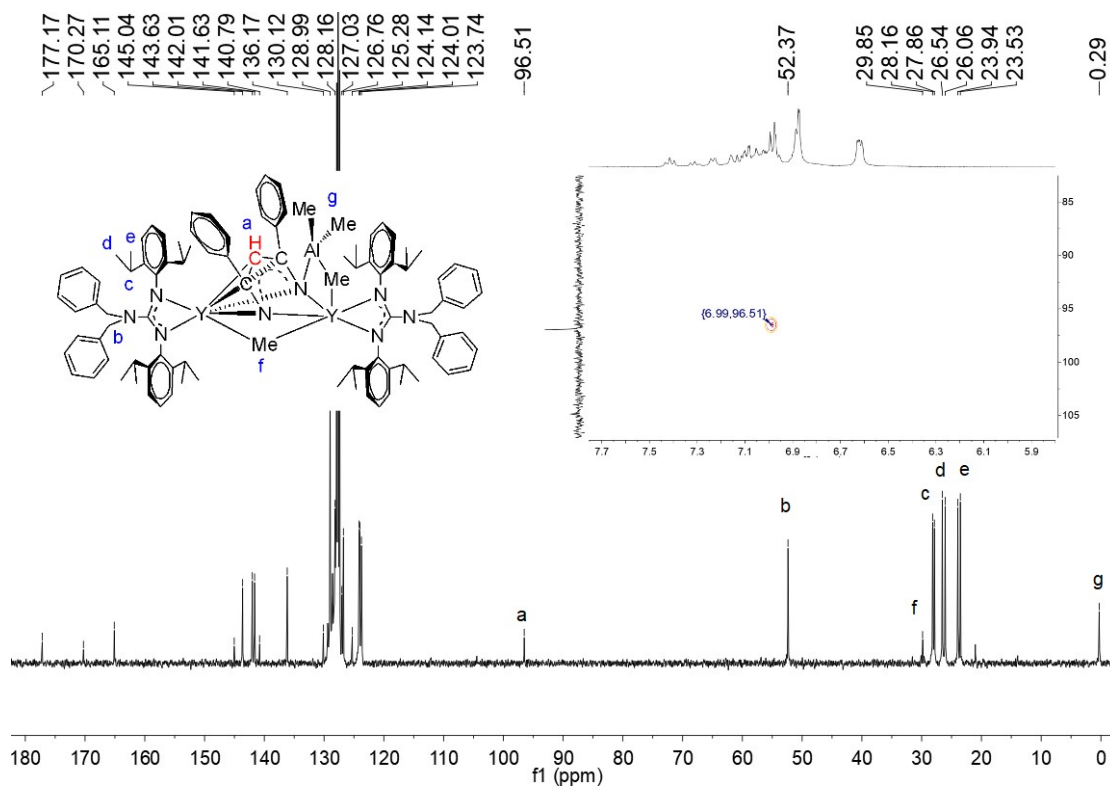

**Fig. S11** <sup>13</sup>C{<sup>1</sup>H} NMR spectrum of **4** obtained in C<sub>6</sub>D<sub>6</sub> at room temperature.

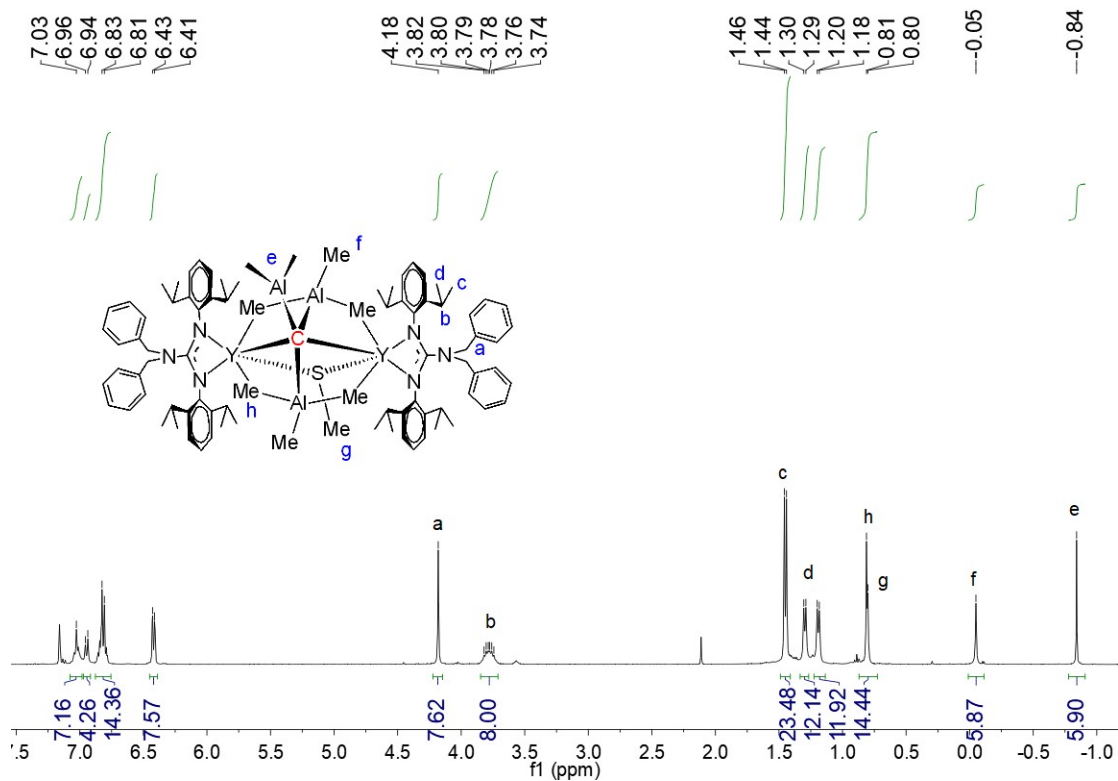

Fig. S12  $^1\text{H}$  NMR spectrum of **5** obtained in  $\text{C}_6\text{D}_6$  at room temperature.

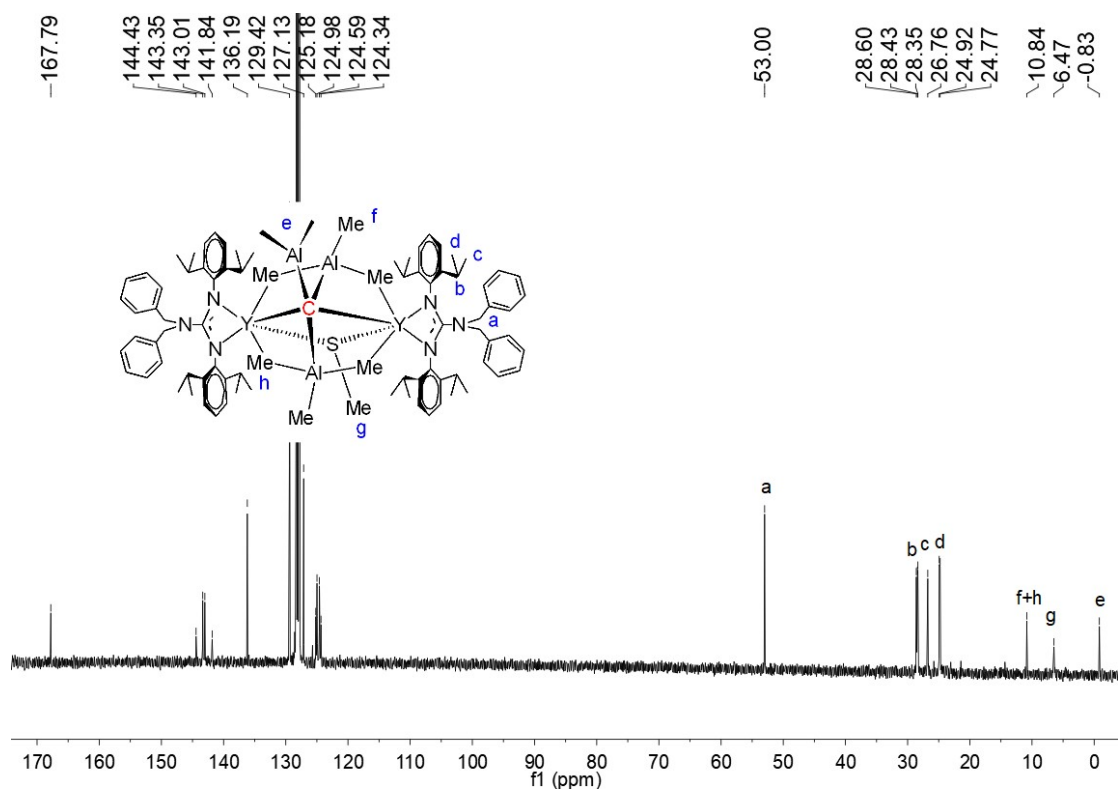

Fig. S13  $^{13}\text{C}\{^1\text{H}\}$  NMR spectrum of **5** obtained in  $\text{C}_6\text{D}_6$  at room temperature.

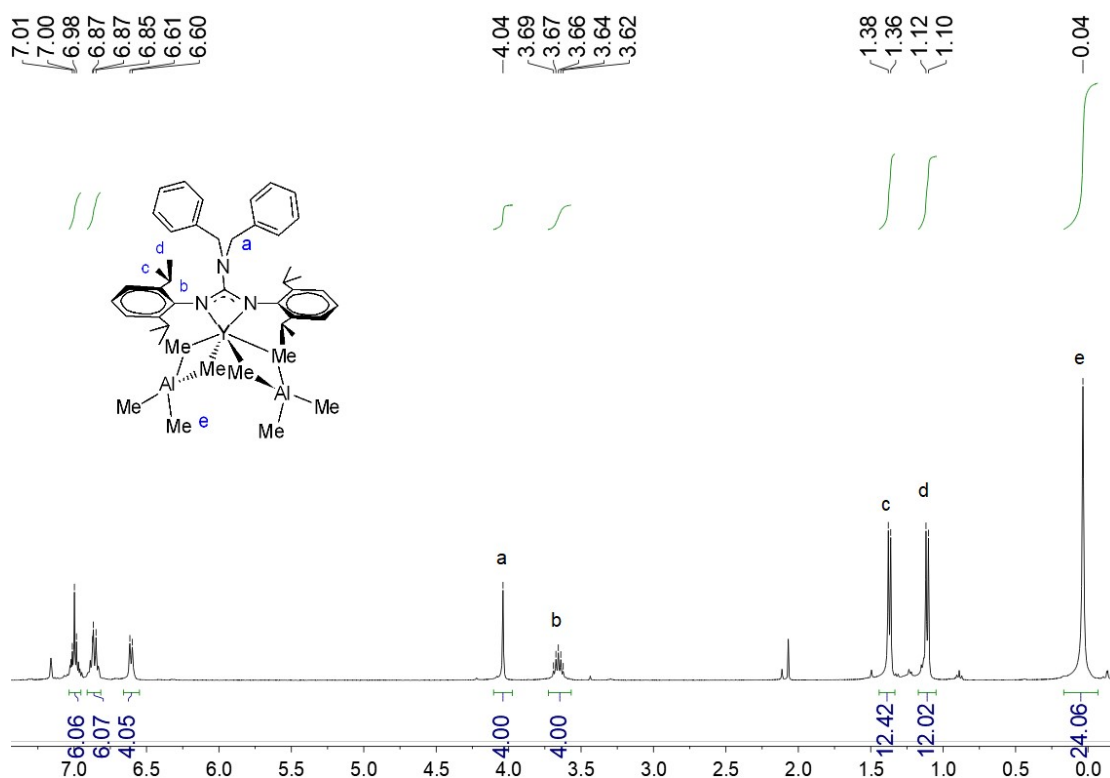

**Fig. S14** <sup>1</sup>H NMR spectrum of **6** obtained in C<sub>6</sub>D<sub>6</sub> at room temperature.

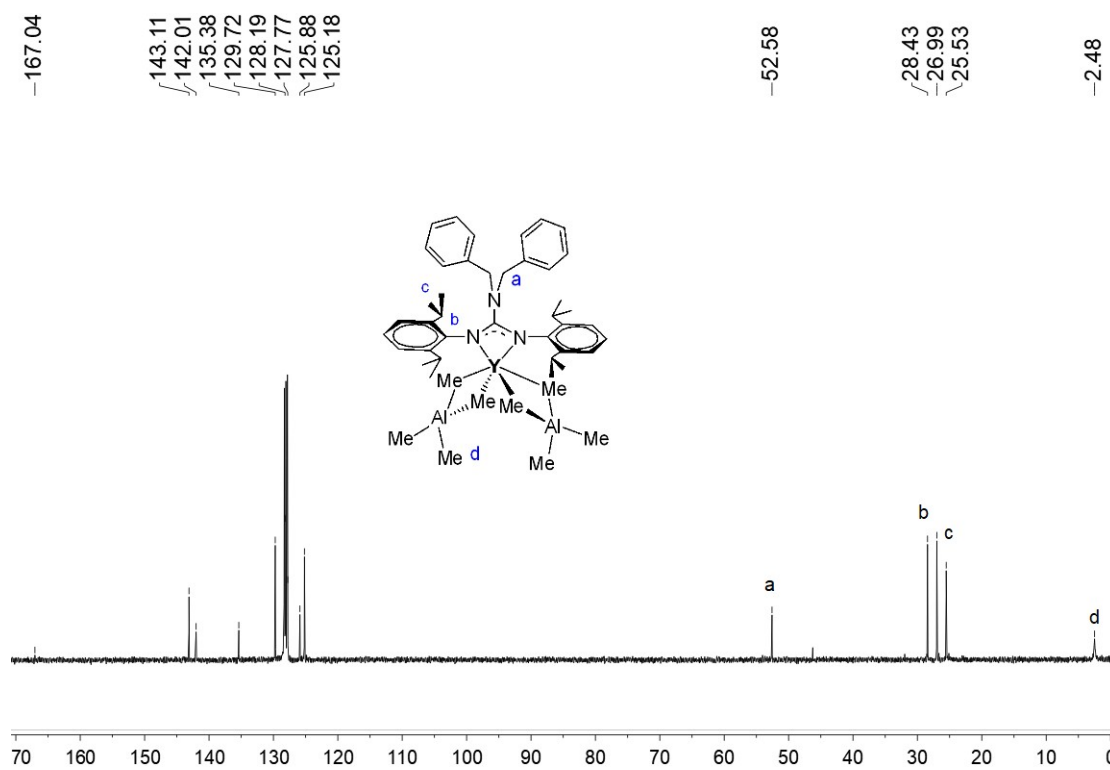

**Fig. S15** <sup>13</sup>C{<sup>1</sup>H} NMR spectrum of **6** obtained in C<sub>6</sub>D<sub>6</sub> at room temperature.

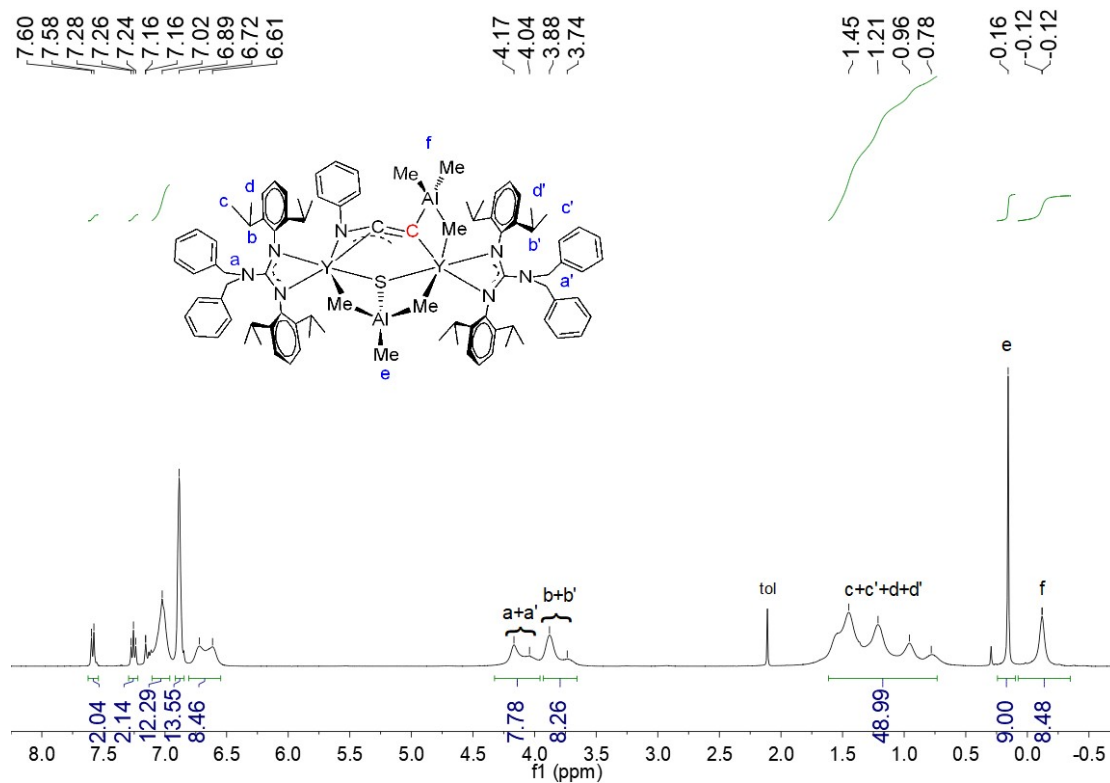

Fig. S16  $^1\text{H}$  NMR spectrum of **7** obtained in  $\text{C}_6\text{D}_6$  at room temperature.

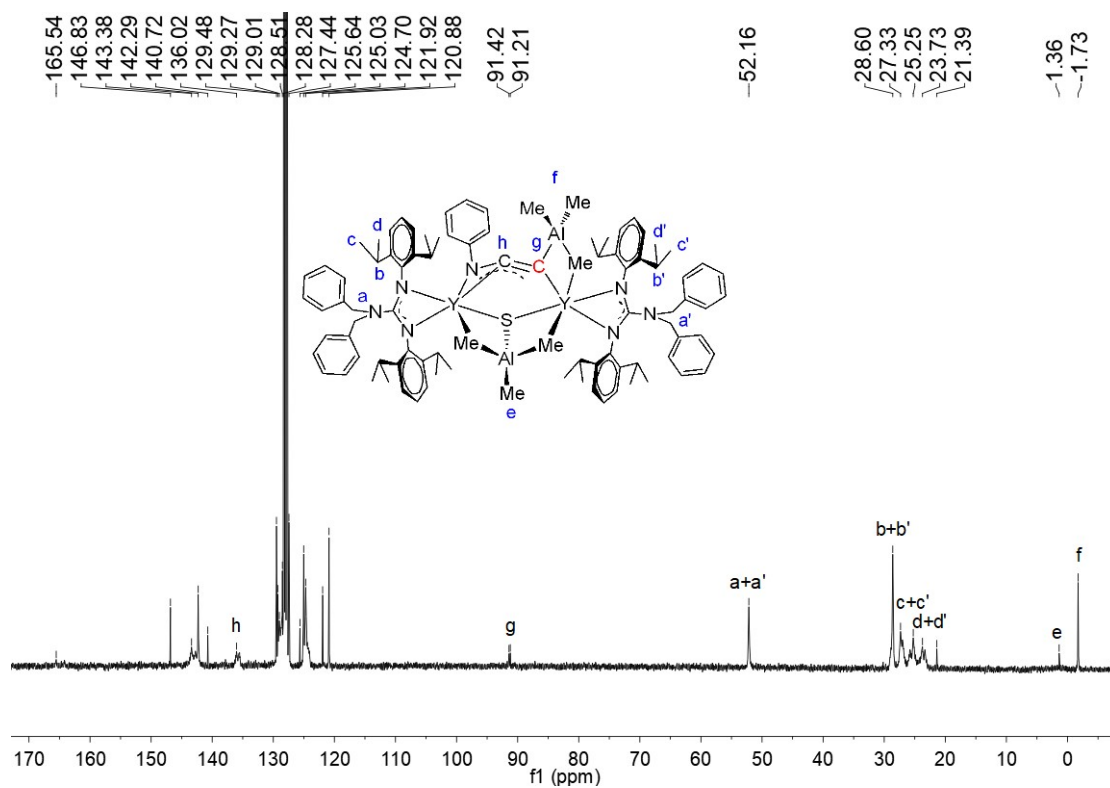

Fig. S17  $^{13}\text{C}\{^1\text{H}\}$  NMR spectrum of **7** obtained in  $\text{C}_6\text{D}_6$  at room temperature.

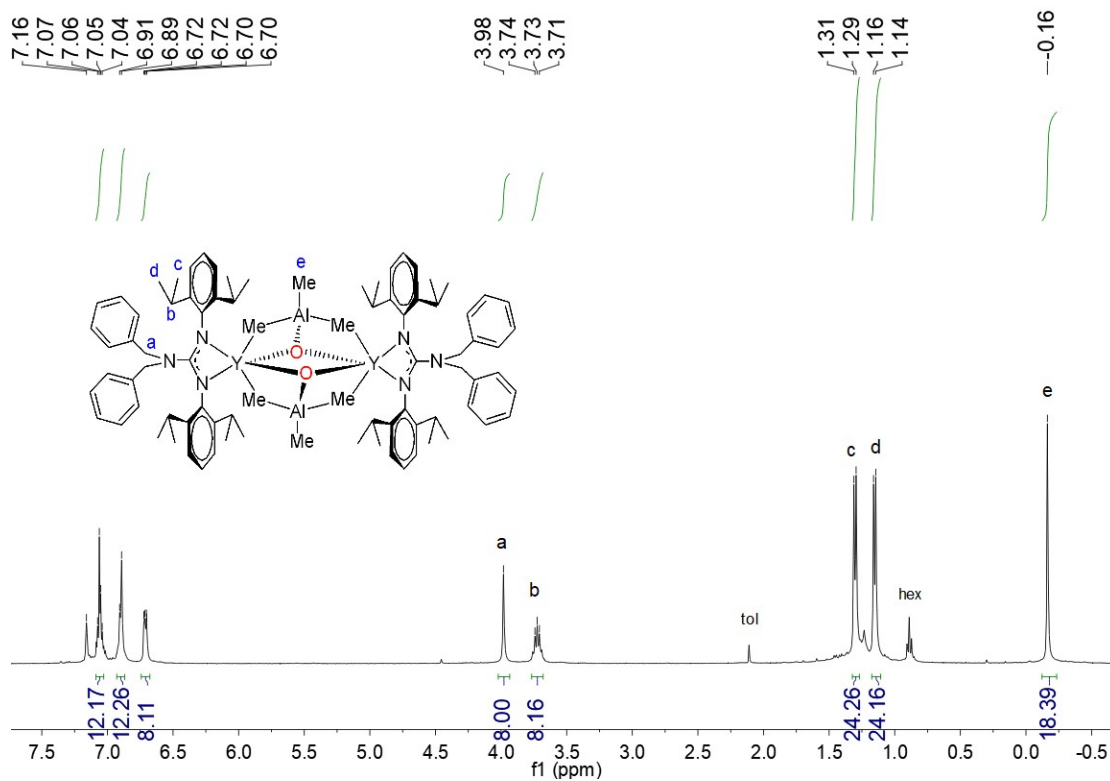

**Fig. S18**  $^1\text{H}$  NMR spectrum of **8** obtained in  $\text{C}_6\text{D}_6$  at room temperature.

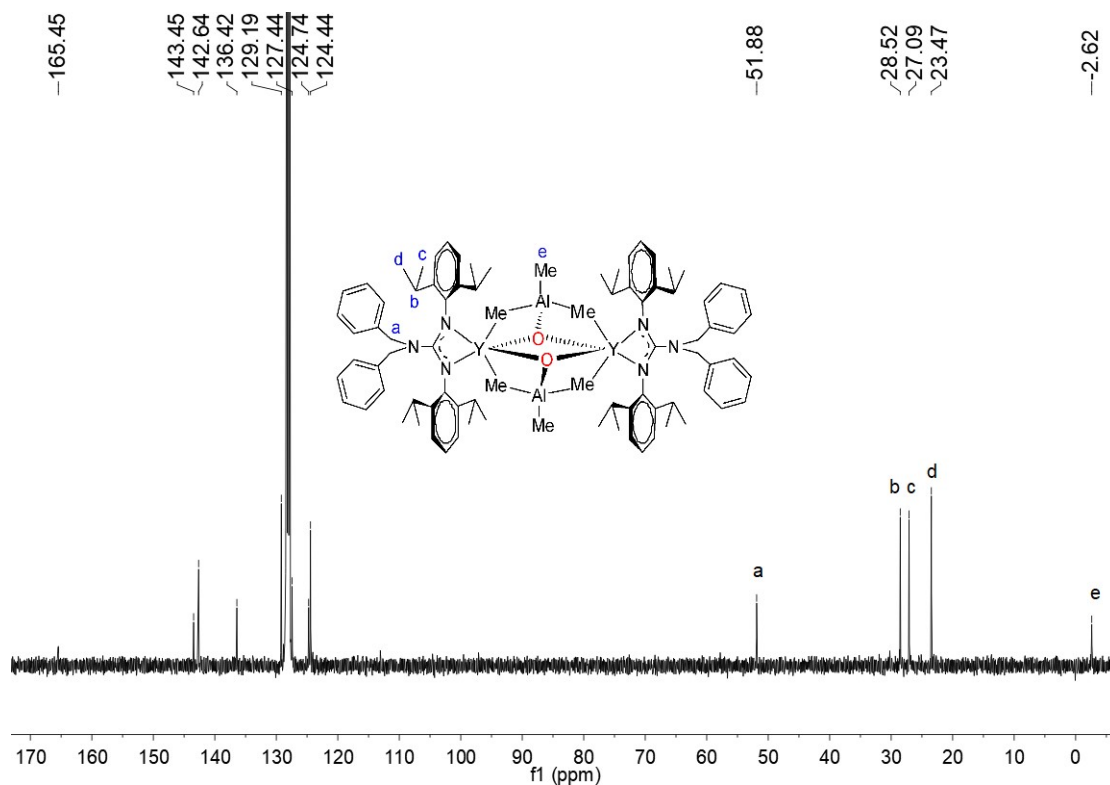

**Fig. S19**  $^{13}\text{C}\{^1\text{H}\}$  NMR spectrum of **8** obtained in  $\text{C}_6\text{D}_6$  at room temperature.

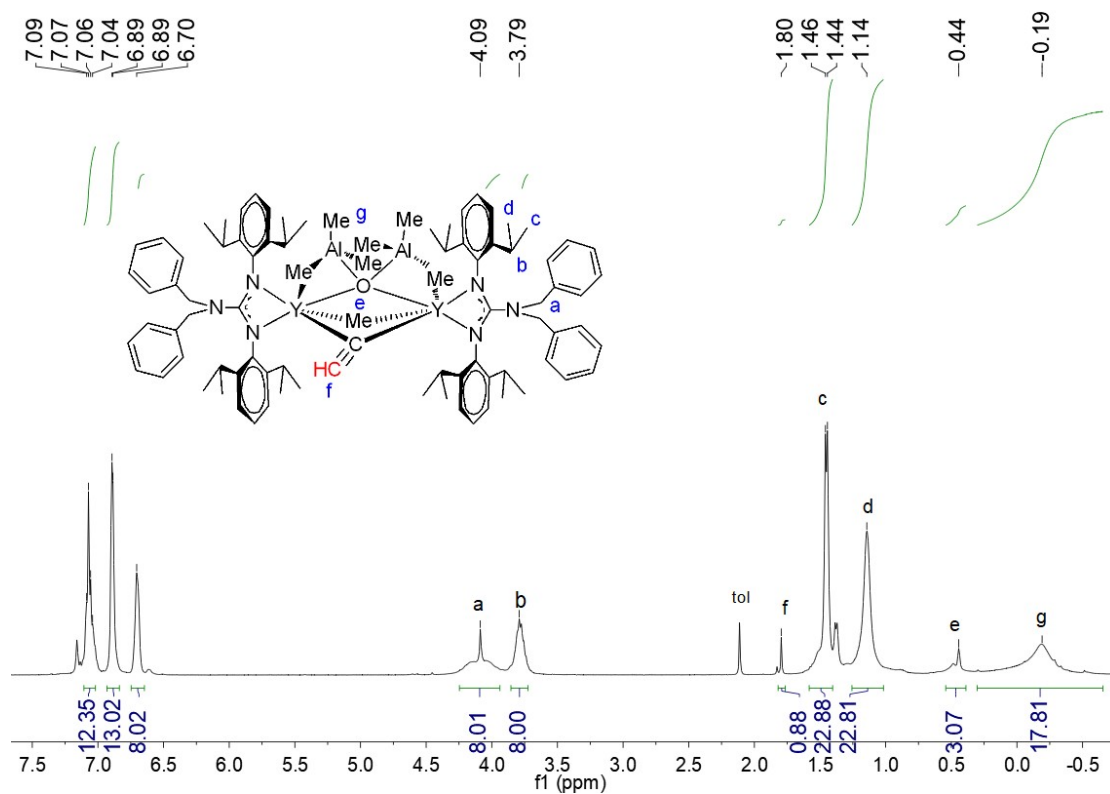

Fig. S20  $^1\text{H}$  NMR spectrum of **9** obtained in  $\text{C}_6\text{D}_6$  at room temperature.

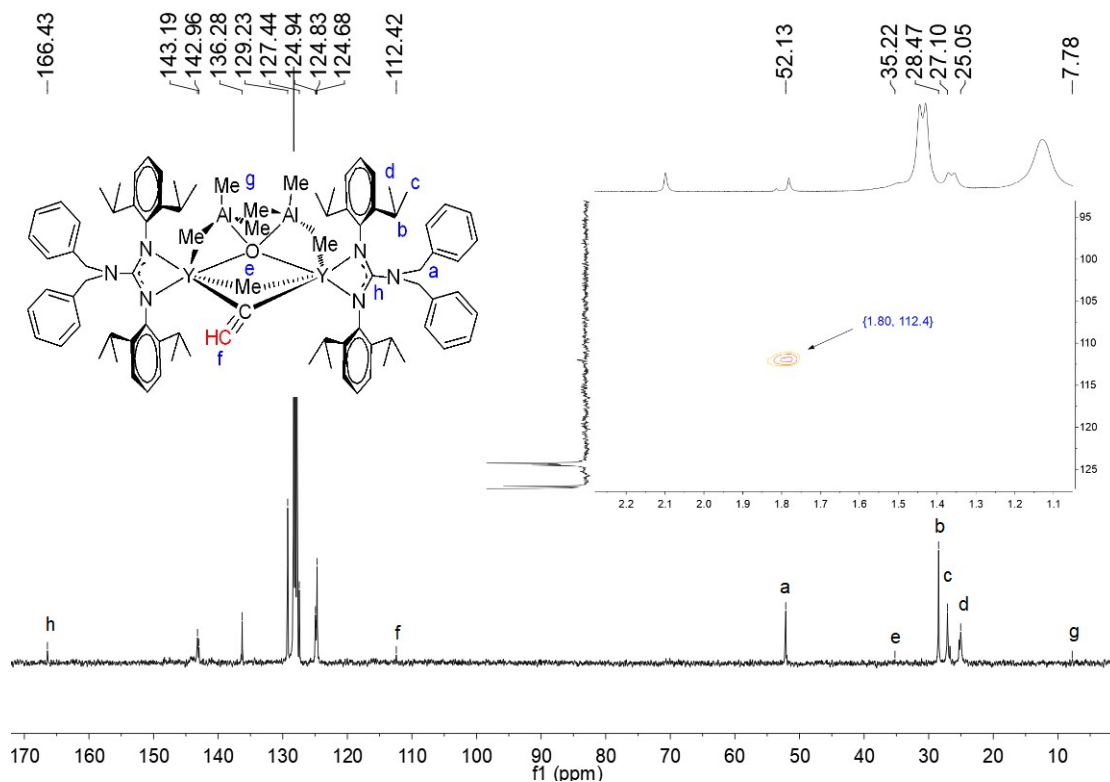

Fig. S21  $^{13}\text{C}\{^1\text{H}\}$  NMR spectrum of **9** obtained in  $\text{C}_6\text{D}_6$  at room temperature.





### **X-ray Crystallographic structure determinations**

All crystals for X-ray analysis were obtained as described in the preparations. In the glovebox, the suitable crystals were sealed in dried immersion oil. Data collections were performed on a Bruker SMART APEX or Bruker SMART APEX II (at 173 K or 298 K) diffractometer with CCD area detector using graphite-monochromated Mo/Ga K $\alpha$  radiation ( $\lambda = 0.71073 \text{ \AA}$  /  $\lambda = 1.34138 \text{ \AA}$ ). The determination of crystal class and unit cell was carried out by using the SMART program package. The raw frame data were processed using SAINT<sup>[1]</sup> and SADABS<sup>[2]</sup> to yield the reflection data file. The structure was solved by using the SHELXTL program<sup>[3]</sup> Refinement was performed on  $F^2$  anisotropically by the full-matrix least-squares method for all the non-hydrogen atoms. The analytical scattering factors for neutral atoms were used throughout the analysis. Except for the hydrogen atoms on bridging carbons, hydrogen atoms were placed at the calculated positions and included in the structure calculation without further refinement of the parameters. The hydrogen atoms on bridging carbons were located by difference Fourier syntheses and their coordinates and isotropic parameters were refined. The residual electron densities were of no chemical significance. Crystal data, data collection, and processing parameters: 2189939 (for **1**), 2189941 (for **3**), 2189946 (for **4**), 2189943 (for **5**), 2262169 (for **6**), 2189944 (for **7**), 2189945 (for **8**) and 2189942 (for **9**) contain the supplementary crystallographic data for this paper. These data can be obtained free of charge from The Cambridge Crystallographic Data Centre via <https://www.ccdc.cam.ac.uk/Community/Depositastructure/CSDCommunications/>

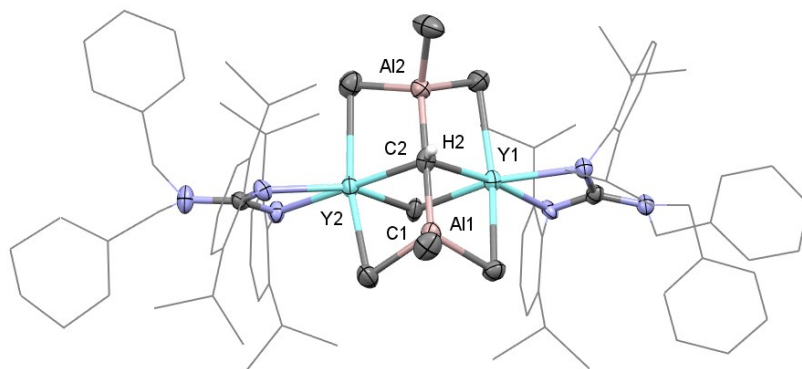

**Fig. S24** Molecular structure of complex **1** with thermal ellipsoids at 30% probability except for the 2,6-*i*Pr<sub>2</sub>C<sub>6</sub>H<sub>3</sub> groups and benzyl groups in the guanidinate ligand. All hydrogen atoms (except for H2) are omitted for clarity. Selected bond lengths (Å) and angles (deg): Y(1)–C(1) 2.528(6), Y(1)–C(2) 2.418(5), Y(2)–C(1) 2.543(5), Y(2)–C(2) 2.398(5), C(2)–Al(1) 1.974(5), C(2)–Al(2) 1.970(5), Y(1)–Al(1) 3.083(17), Y(1)–Al(2) 3.057(19); C(1)–Y(1)–C(2) 85.47(15), C(1)–Y(2)–C(2) 85.55(15), Y(1)–C(1)–Y(2) 91.29(17), Y(1)–C(2)–Y(2) 97.65(16).

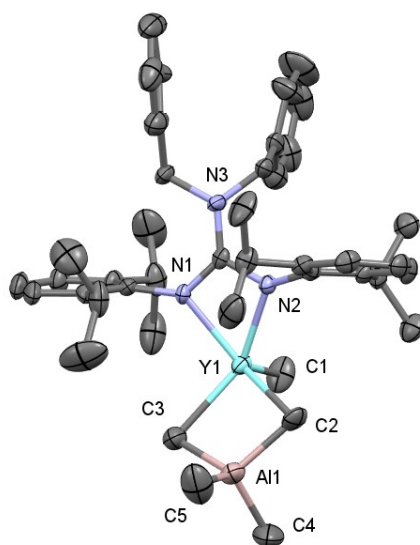

**Fig. S25** Molecular structure of complex **2** with thermal ellipsoids at 30% probability. All hydrogen atoms are omitted for clarity.

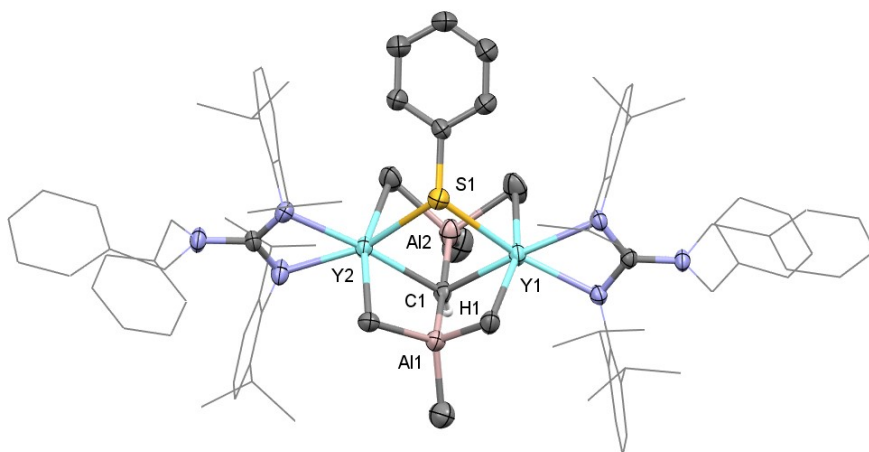

**Fig. S26** Molecular structures of **3** with thermal ellipsoids at 30% probability except for the 2,6-(*i*-Pr)<sub>2</sub>C<sub>6</sub>H<sub>3</sub> groups and benzyl groups in the guanidinate ligand. All hydrogen atoms (except for H2) are omitted for clarity. Selected bond lengths (Å) and angles (deg): Y(1)–C(1) 2.451(4), Y(1)–S(1) 2.799(12), Y(2)–C(1) 2.469(4), Y(2)–S(1) 2.821(13), C(1)–Al(1) 1.984(5), C(1)–Al(2) 1.979(5), Y(1)–Al(1) 3.051(15), Y(1)–Al(2) 3.050(17); C(1)–Y(1)–S(1) 82.81(10), C(1)–Y(2)–S(1) 81.04(11), Y(1)–C(1)–Y(2) 106.19(17), Y(1)–S(1)–Y(2) 88.85(4).

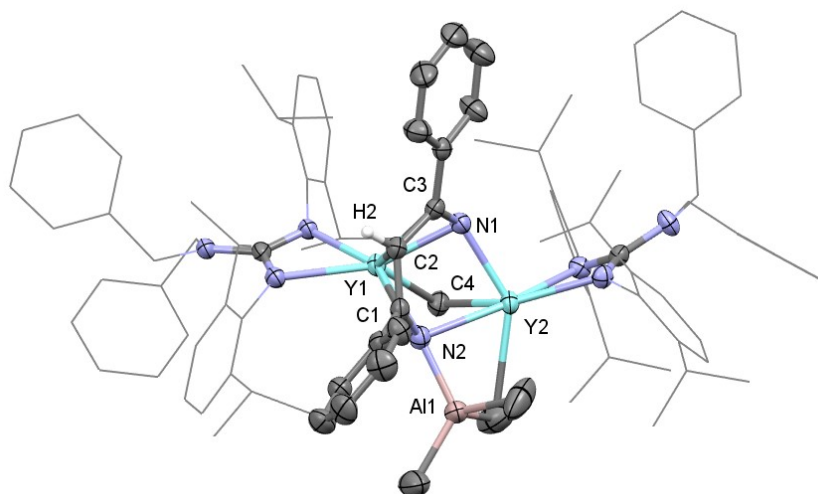

**Fig. S27** Molecular structures of **4** with thermal ellipsoids at 30% probability except for the 2,6-(*i*-Pr)<sub>2</sub>C<sub>6</sub>H<sub>3</sub> groups and benzyl groups in the guanidinate ligand. All hydrogen atoms (except for H2) are omitted for clarity. Selected bond lengths (Å) and angles (deg): Y(1)–C(1) 2.724(4), Y(1)–C(2) 2.649(4), Y(1)–C(3) 2.665(4), Y(1)–C(4) 2.434(5), Y(1)–N(1) 2.315(3), Y(1)–N(2) 2.399(3), Y(2)–N(1) 2.241(4), Y(2)–N(2) 2.528(3), Y(2)–C(4) 2.555(5), N(1)–C(3) 1.304(5), C(2)–C(3) 1.447(6), C(1)–C(2) 1.431(6), C(1)–N(2) 1.334(5), N(2)–Al(1) 1.922(4); C(2)–Y(1)–C(4) 130.41(14), N(1)–Y(1)–N(2) 75.15(12), Y(1)–N(1)–Y(2) 89.86(13), Y(1)–N(2)–Y(2) 81.52(10), Y(1)–C(4)–Y(2) 80.31(15).

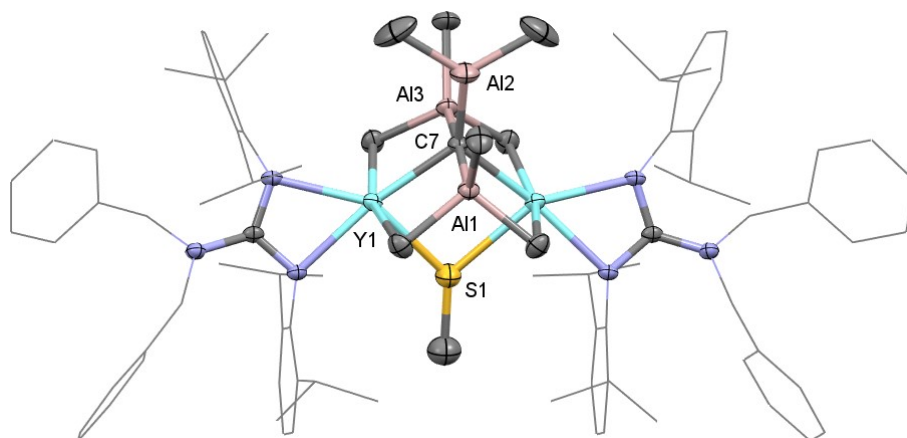

**Fig. S28** Molecular structures of **5** with thermal ellipsoids at 30% probability except for the 2,6- $(i\text{Pr})_2\text{C}_6\text{H}_3$  groups and benzyl groups in the guanidinate ligand. All hydrogen atoms are omitted for clarity. Selected bond lengths (Å) and angles (deg): Y(1)–C(7) 2.434(3), Y(1)–S(1) 2.673(13), C(7)–Al(1) 1.984(6), C(7)–Al(2) 1.935(6), C(7)–Al(3) 1.963(6); C(7)–Y(1)–S(1) 84.07(10), Y(1)–C(7)–Y(1A) 101.87(19), Y(1)–S(1)–Y(1A) 89.97(6), Al(1)–C(7)–Al(2) 89.3(2), Al(2)–C(7)–Al(3) 98.4(2), Al(1)–C(7)–Al(3) 172.3(3).

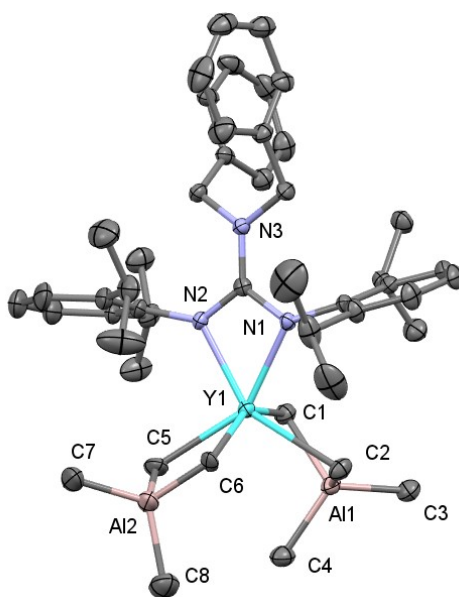

**Fig. S29** Molecular structures of **6** with thermal ellipsoids at 30% probability. All hydrogen atoms are omitted for clarity. Selected bond lengths (Å) and angles (deg): Y(1)–C(1) 2.556(7), Y(1)–C(2) 2.567(7), Y(1)–C(5) 2.573(9), Y(1)–C(6) 2.268(5), Y(1)–N(1) 2.323(5), Y(1)–N(2) 2.296(4); C(1)–Y(1)–C(2) 79.9(2), C(1)–Y(1)–C(5) 87.9(3), C(1)–Y(1)–C(6) 145.5(2), N(1)–Y(1)–C(1) 100.4(2), N(2)–Y(1)–C(1) 95.2(2).

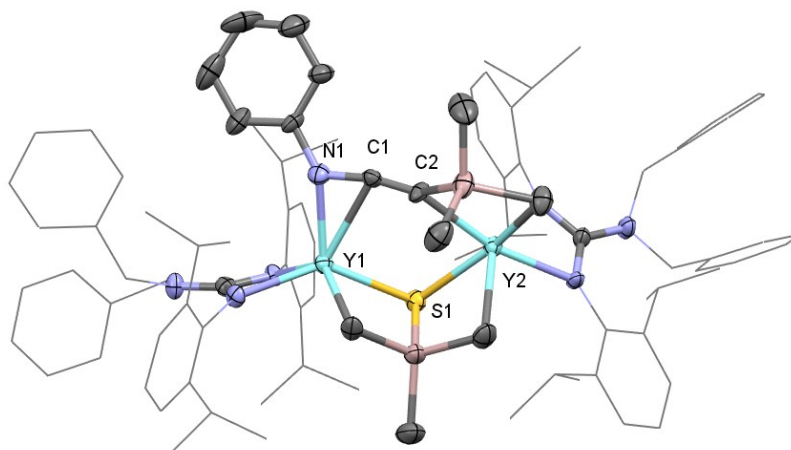

**Fig. S30** Molecular structures of **7** with thermal ellipsoids at 30% probability except for the 2,6-(*i*-Pr)<sub>2</sub>C<sub>6</sub>H<sub>3</sub> groups and benzyl groups in the guanidinate ligand. All hydrogen atoms are omitted for clarity. Selected bond lengths (Å) and angles (deg): Y(1)–N(1) 2.323(5), Y(1)–C(1) 2.627(6), C(2)–C(1) 1.221(8), N(1)–C(1) 1.329(8), Y(2)–C(2) 2.499(6), Y(1)–S(1) 2.665(16), Y(2)–S(1) 2.654(17), C(2)–Al(2) 2.041(6), Al(1)–S(1) 2.286(3); C(1)–Y(1)–S(1) 93.18(14), C(2)–Y(2)–S(1) 87.83(15), Y(1)–S(1)–Y(2) 103.27(6), C(2)–C(1)–N(1) 167.6(6).

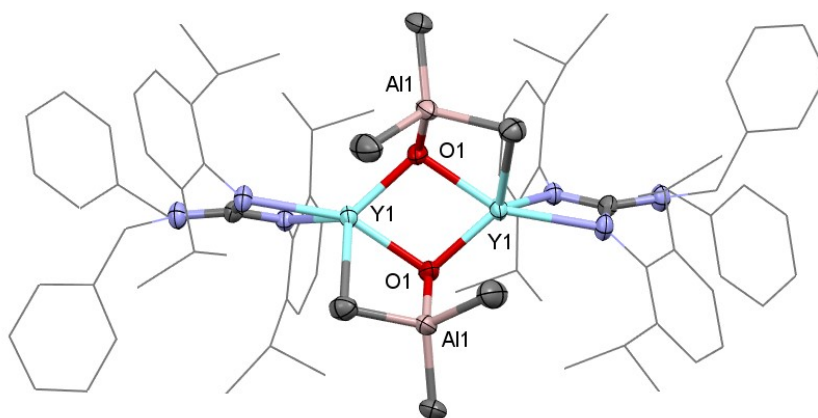

**Fig. S31** Molecular structures of **8** with thermal ellipsoids at 30% probability except for the 2,6-(*i*-Pr)<sub>2</sub>C<sub>6</sub>H<sub>3</sub> groups and benzyl groups in the guanidinate ligand. All hydrogen atoms are omitted for clarity. Selected bond lengths (Å) and angles (deg): Y(1)–O(1) 2.207(2), Y(1A)–O(1) 2.122(3), O(1)–Al(1) 1.780(3), Y(1)–Y(1A) 3.389(8); O(1)–Y(1)–O(1A) 76.36(10), Y(1)–O(1)–Y(1A) 103.03(10), Y(1)–O(1)–Al(1) 103.39(12), Y(1A)–O(1)–Al(1) 114.16(14).

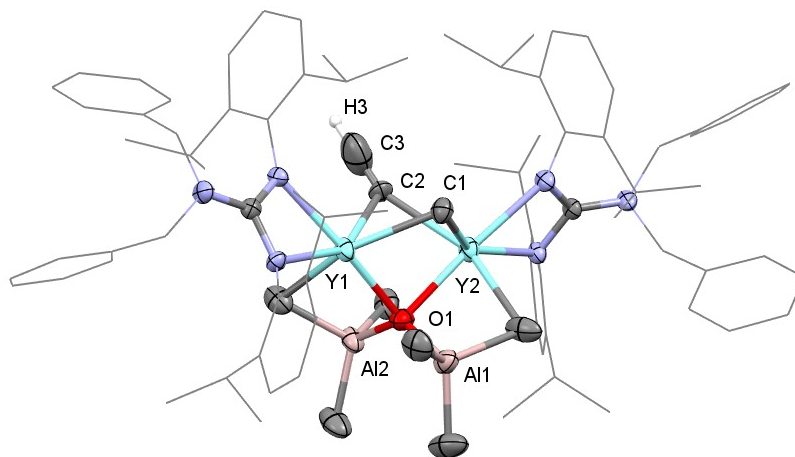

**Fig. S32** Molecular structures of **9** with thermal ellipsoids at 30% probability except for the 2,6-(*i*Pr)<sub>2</sub>C<sub>6</sub>H<sub>3</sub> groups and benzyl groups in the guanidinate ligand. All hydrogen atoms (except for H3) are omitted for clarity. Selected bond lengths (Å) and angles (deg): Y(1)–C(1) 2.493(6), Y(1)–C(2) 2.537(6), Y(1)–O(1) 2.331(4), Y(2)–O(1) 2.328(4), Y(2)–C(1) 2.591(5), Y(2)–C(2) 2.440(6), C(2)–C(3) 1.065(12); C(1)–Y(1)–C(2) 73.34(19), C(1)–Y(2)–C(2) 73.26(19), Y(1)–C(1)–Y(2) 81.99(17), Y(1)–C(2)–Y(2) 84.13(18), Y(1)–O(1)–Y(2) 91.44(12), Y(1)–C(2)–C(3) 118.1(7), Y(2)–C(2)–C(3) 155.1(7), Y(1)–O(1)–Al(1) 113.09(18), Y(1)–O(1)–Al(2) 99.56(16).

**Table S1.** Crystal data and refinement details of complexes **1**, **3**, **4**

|                                                                                                       | <b>1</b>                                                                       | <b>3</b>                                                                        | <b>4·tol</b>                                                       |
|-------------------------------------------------------------------------------------------------------|--------------------------------------------------------------------------------|---------------------------------------------------------------------------------|--------------------------------------------------------------------|
| Formula                                                                                               | C <sub>86</sub> H <sub>118</sub> Al <sub>2</sub> N <sub>6</sub> Y <sub>2</sub> | C <sub>91</sub> H <sub>120</sub> Al <sub>2</sub> N <sub>6</sub> SY <sub>2</sub> | C <sub>104</sub> H <sub>124</sub> AlN <sub>8</sub> Y <sub>2</sub>  |
| Molecular weight                                                                                      | 1467.64                                                                        | 1561.76                                                                         | 1690.90                                                            |
| Crystal system                                                                                        | Triclinic                                                                      | Monoclinic                                                                      | Triclinic                                                          |
| Space group                                                                                           | P-1                                                                            | P2 <sub>1</sub> /c                                                              | P-1                                                                |
| <i>a</i> / (Å)                                                                                        | 13.575(5)                                                                      | 18.210(3)                                                                       | 12.163(5)                                                          |
| <i>b</i> / (Å)                                                                                        | 18.655(7)                                                                      | 22.124(3)                                                                       | 18.782(6)                                                          |
| <i>c</i> / (Å)                                                                                        | 19.146(8)                                                                      | 26.122(4)                                                                       | 22.351(8)                                                          |
| <i>V</i> / (Å <sup>3</sup> )                                                                          | 4199(3)                                                                        | 10091(3)                                                                        | 4574.5(3)                                                          |
| <i>Z</i>                                                                                              | 2                                                                              | 4                                                                               | 2                                                                  |
| $\rho_c$ / (mg. m <sup>-3</sup> )                                                                     | 1.161                                                                          | 1.028                                                                           | 1.228                                                              |
| $\mu$ (Mo-K $\alpha$ )/(mm <sup>-1</sup> )                                                            | 1.440                                                                          | 1.222                                                                           | 1.444                                                              |
| Limiting indices                                                                                      | -16 ≤ <i>h</i> ≤ 14,<br>-20 ≤ <i>k</i> ≤ 22,<br>-22 ≤ <i>l</i> ≤ 20            | -20 ≤ <i>h</i> ≤ 21,<br>-26 ≤ <i>k</i> ≤ 21,<br>-30 ≤ <i>l</i> ≤ 31             | -14 ≤ <i>h</i> ≤ 14<br>-22 ≤ <i>k</i> ≤ 22<br>-26 ≤ <i>l</i> ≤ 26  |
| Collected reflections                                                                                 | 17561                                                                          | 49629                                                                           | 145718                                                             |
| Unique                                                                                                | 14597<br>[R(int) = 0.0445]                                                     | 17884<br>[R(int) = 0.0606]                                                      | 16178 [R(int) =<br>0.2260]                                         |
| Parameters                                                                                            | 865                                                                            | 962                                                                             | 1067                                                               |
| Goodness of fit on <i>F</i> <sup>2</sup>                                                              | 0.859                                                                          | 0.918                                                                           | 0.996                                                              |
| <i>R</i> <sub>1</sub> <sup>a</sup> , <i>wR</i> <sub>2</sub> <sup>a</sup> [ <i>I</i> > 2σ( <i>I</i> )] | <i>R</i> <sub>1</sub> = 0.0537<br><i>wR</i> <sub>2</sub> = 0.1115              | <i>R</i> <sub>1</sub> = 0.0634<br><i>wR</i> <sub>2</sub> = 0.1601               | <i>R</i> <sub>1</sub> = 0.0565,<br><i>wR</i> <sub>2</sub> = 0.1303 |
| <i>R</i> <sub>1</sub> , <i>wR</i> <sub>2</sub> indices (all data)                                     | <i>R</i> <sub>1</sub> = 0.1301<br><i>wR</i> <sub>2</sub> = 0.1341              | <i>R</i> <sub>1</sub> = 0.1124<br><i>wR</i> <sub>2</sub> = 0.1792               | <i>R</i> <sub>1</sub> = 0.0987<br><i>wR</i> <sub>2</sub> = 0.1529  |
| Max/min residual density (e Å <sup>-3</sup> )                                                         | 1.16 and -0.84                                                                 | 0.95 and -1.84                                                                  | 0.58 and -1.70                                                     |

<sup>a</sup>  $R_1 = \sum || F_0 | - | F_c ||$  (based on reflections with  $F_o^2 > 2\sigma F^2$ ).  $wR_2 = [\sum [w(F_o^2 - F_c^2)^2] / \sum [w(F_o^2)^2]]^{1/2}$ ;  $w = 1/[\sigma^2(F_o^2) + (0.095P)^2]$ ;  $P = [\max(F_o^2, 0) + 2F_c^2]/3$  (also with  $F_o^2 > 2\sigma F^2$ ).



**Table S2.** Crystal data and refinement details of complexes **5**, **6** and **7**

|                                                                                                       | <b>5</b>                                                                        | <b>6</b>                                                            | <b>7</b>                                                                        |
|-------------------------------------------------------------------------------------------------------|---------------------------------------------------------------------------------|---------------------------------------------------------------------|---------------------------------------------------------------------------------|
| Formula                                                                                               | C <sub>88</sub> H <sub>123</sub> Al <sub>3</sub> N <sub>6</sub> SY <sub>2</sub> | C <sub>47</sub> H <sub>72</sub> Al <sub>2</sub> N <sub>3</sub> Y    | C <sub>92</sub> H <sub>119</sub> Al <sub>2</sub> N <sub>7</sub> SY <sub>2</sub> |
| Molecular weight                                                                                      | 1555.74                                                                         | 821.98                                                              | 1586.77                                                                         |
| Crystal system                                                                                        | Monoclinic                                                                      | Orthorhombic                                                        | Monoclinic                                                                      |
| Space group                                                                                           | P2 <sub>1</sub> /m                                                              | P2 <sub>1</sub> 2 <sub>1</sub> 2 <sub>1</sub>                       | C2/c                                                                            |
| <i>a</i> / (Å)                                                                                        | 10.482(6)                                                                       | 11.072(3)                                                           | 69.627(11)                                                                      |
| <i>b</i> / (Å)                                                                                        | 36.766(2)                                                                       | 12.107(3)                                                           | 13.874(2)                                                                       |
| <i>c</i> / (Å)                                                                                        | 11.947(7)                                                                       | 36.431(9)                                                           | 21.791(3)                                                                       |
| <i>V</i> / (Å <sup>3</sup> )                                                                          | 4263.8(4)                                                                       | 4883.3(2)                                                           | 20793(6)                                                                        |
| <i>Z</i>                                                                                              | 2                                                                               | 4                                                                   | 8                                                                               |
| $\rho_c$ / (mg. m <sup>-3</sup> )                                                                     | 1.212                                                                           | 1.118                                                               | 1.014                                                                           |
| $\mu$ (Mo-K $\alpha$ )/(mm <sup>-1</sup> )                                                            | 1.784                                                                           | 1.498                                                               | 1.187                                                                           |
| Limiting indices                                                                                      | -12 ≤ <i>h</i> ≤ 12<br>-43 ≤ <i>k</i> ≤ 43<br>-14 ≤ <i>l</i> ≤ 14               | -21 ≤ <i>h</i> ≤ 13,<br>-14 ≤ <i>k</i> ≤ 14,<br>-43 ≤ <i>l</i> ≤ 42 | -82 ≤ <i>h</i> ≤ 82<br>-16 ≤ <i>k</i> ≤ 16<br>-25 ≤ <i>l</i> ≤ 22               |
| Collected reflections                                                                                 | 77256                                                                           | 29693                                                               | 59613                                                                           |
| Unique                                                                                                | 7663 [R(int) =<br>0.0963]                                                       | 8569 [R(int) =<br>0.0565]                                           | 18380 [R(int) =<br>0.0764]                                                      |
| Parameters                                                                                            | 499                                                                             | 528                                                                 | 974                                                                             |
| Goodness of fit on <i>F</i> <sup>2</sup>                                                              | 1.066                                                                           | 1.055                                                               | 1.011                                                                           |
| <i>R</i> <sub>1</sub> <sup>a</sup> , <i>wR</i> <sub>2</sub> <sup>a</sup> [ <i>I</i> > 2σ( <i>I</i> )] | <i>R</i> <sub>1</sub> = 0.0528<br><i>wR</i> <sub>2</sub> = 0.1444               | <i>R</i> <sub>1</sub> = 0.0465<br><i>wR</i> <sub>2</sub> = 0.1273   | <i>R</i> <sub>1</sub> = 0.0855<br><i>wR</i> <sub>2</sub> = 0.2399               |
| <i>R</i> <sub>1</sub> , <i>wR</i> <sub>2</sub> indices (all data)                                     | <i>R</i> <sub>1</sub> = 0.0621<br><i>wR</i> <sub>2</sub> = 0.1515               | <i>R</i> <sub>1</sub> = 0.0529<br><i>wR</i> <sub>2</sub> = 0.1318   | <i>R</i> <sub>1</sub> = 0.1247<br><i>wR</i> <sub>2</sub> = 0.2649               |
| Max/min residual density (e Å <sup>-3</sup> )                                                         | 0.69 and -0.98                                                                  | 2.08 and -0.49                                                      | 1.04 and -1.13                                                                  |

<sup>a</sup>  $R_1 = \sum || F_0 | - | F_c ||$  (based on reflections with  $F_o^2 > 2\sigma F^2$ ).  $wR_2 = [\sum [w(F_o^2 - F_c^2)^2] / \sum [w(F_o^2)^2]]^{1/2}$ ;  $w = 1/[\sigma^2(F_o^2) + (0.095P)^2]$ ;  $P = [\max(F_o^2, 0) + 2F_c^2]/3$  (also with  $F_o^2 > 2\sigma F^2$ ).

**Table S3.** Crystal data and refinement details of complexes **8** and **9**

|                                                                                                       | <b>8</b>                                                                                      | <b>9</b>                                                                        |
|-------------------------------------------------------------------------------------------------------|-----------------------------------------------------------------------------------------------|---------------------------------------------------------------------------------|
| Formula                                                                                               | C <sub>84</sub> H <sub>114</sub> Al <sub>2</sub> N <sub>6</sub> O <sub>2</sub> Y <sub>2</sub> | C <sub>87</sub> H <sub>118</sub> Al <sub>2</sub> N <sub>6</sub> OY <sub>2</sub> |
| Molecular weight                                                                                      | 1471.58                                                                                       | 1495.65                                                                         |
| Crystal system                                                                                        | Monoclinic                                                                                    | Monoclinic                                                                      |
| Space group                                                                                           | C2/c                                                                                          | C2/c                                                                            |
| <i>a</i> / (Å)                                                                                        | 35.057(6)                                                                                     | 44.077(4)                                                                       |
| <i>b</i> / (Å)                                                                                        | 11.675(2)                                                                                     | 13.425(13)                                                                      |
| <i>c</i> / (Å)                                                                                        | 20.542(4)                                                                                     | 29.287(3)                                                                       |
| <i>V</i> / (Å <sup>3</sup> )                                                                          | 8289(2)                                                                                       | 17291(3)                                                                        |
| <i>Z</i>                                                                                              | 8                                                                                             | 8                                                                               |
| $\rho_c$ / (mg. m <sup>-3</sup> )                                                                     | 1.179                                                                                         | 1.149                                                                           |
| $\mu$ (Mo-K $\alpha$ )/(mm <sup>-1</sup> )                                                            | 1.461                                                                                         | 1.401                                                                           |
| Limiting indices                                                                                      | -45 ≤ <i>h</i> ≤ 36<br>-14 ≤ <i>k</i> ≤ 14<br>-24 ≤ <i>l</i> ≤ 26                             | -44 ≤ <i>h</i> ≤ 55<br>-16 ≤ <i>k</i> ≤ 16<br>-36 ≤ <i>l</i> ≤ 36               |
| Collected reflections                                                                                 | 23273                                                                                         | 54916                                                                           |
| Unique                                                                                                | 9016                                                                                          | 15258                                                                           |
| Parameters                                                                                            | 452                                                                                           | 927                                                                             |
| Goodness of fit on <i>F</i> <sup>2</sup>                                                              | 0.988                                                                                         | 0.930                                                                           |
| <i>R</i> <sub>1</sub> <sup>a</sup> , <i>wR</i> <sub>2</sub> <sup>a</sup> [ <i>I</i> > 2σ( <i>I</i> )] | <i>R</i> <sub>1</sub> = 0.0561<br><i>wR</i> <sub>2</sub> = 0.1468                             | <i>R</i> <sub>1</sub> = 0.0645<br><i>wR</i> <sub>2</sub> = 0.1657               |
| <i>R</i> <sub>1</sub> , <i>wR</i> <sub>2</sub> indices (all data)                                     | <i>R</i> <sub>1</sub> = 0.1002<br><i>wR</i> <sub>2</sub> = 0.1702                             | <i>R</i> <sub>1</sub> = 0.1240<br><i>wR</i> <sub>2</sub> = 0.1903               |
| Max/min residual density (e Å <sup>-3</sup> )                                                         | 0.79 and -0.48                                                                                | 0.86 and -0.56                                                                  |

<sup>a</sup> *R*<sub>1</sub> =  $\sum ||F_0| - |F_c||$  (based on reflections with  $F_o^2 > 2\sigma F^2$ ). *wR*<sub>2</sub> =  $[\sum [w(F_o^2 - F_c^2)^2] / \sum [w(F_o^2)^2]]^{1/2}$ ; *w* =  $1/[\sigma^2(F_o^2) + (0.095P)^2]$ ; *P* =  $[\max(F_o^2, 0) + 2F_c^2]/3$  (also with  $F_o^2 > 2\sigma F^2$ ).

Proposed reaction pathway towards complex 7.

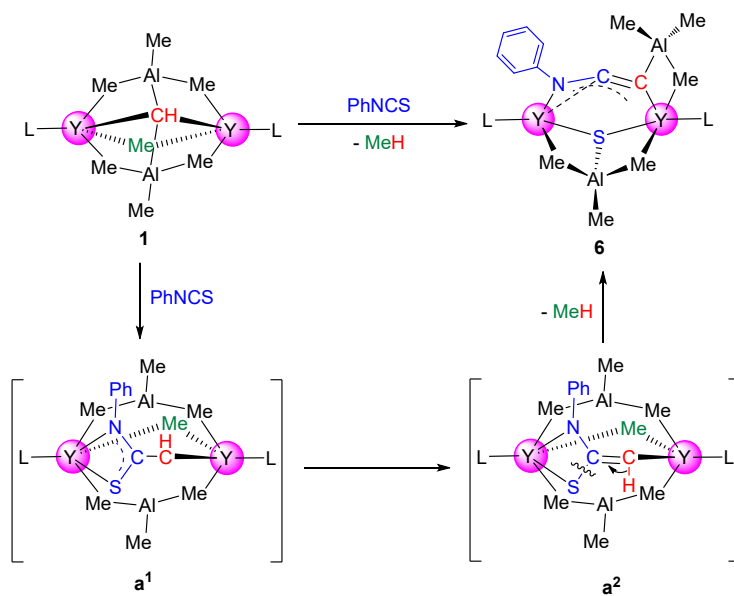

Fig. S33 Proposed reaction pathway for formation of complex 7.

## Computational Details.

All DFT calculations were performed with Gaussian 09.<sup>[4]</sup> Geometries were fully optimized in gas phase without symmetry constraints, employing the B3PW91 functional<sup>[5]</sup> and the Stuttgart effective core potential for Y<sup>[6]</sup> and Al<sup>[7]</sup> augmented with a polarization functions ( $\zeta_f = 1.000$  for Y and  $\zeta_d = 0.325$  for Al). For the other elements (N, H, O and C), Pople's double- $\zeta$  basis set 6-31G(d,p)<sup>[8]</sup> was used. Calculations of vibrational frequencies were systematically done in order to characterize the nature of stationary points. Dispersion corrections were accounted for using the Grimme's D3 scheme.

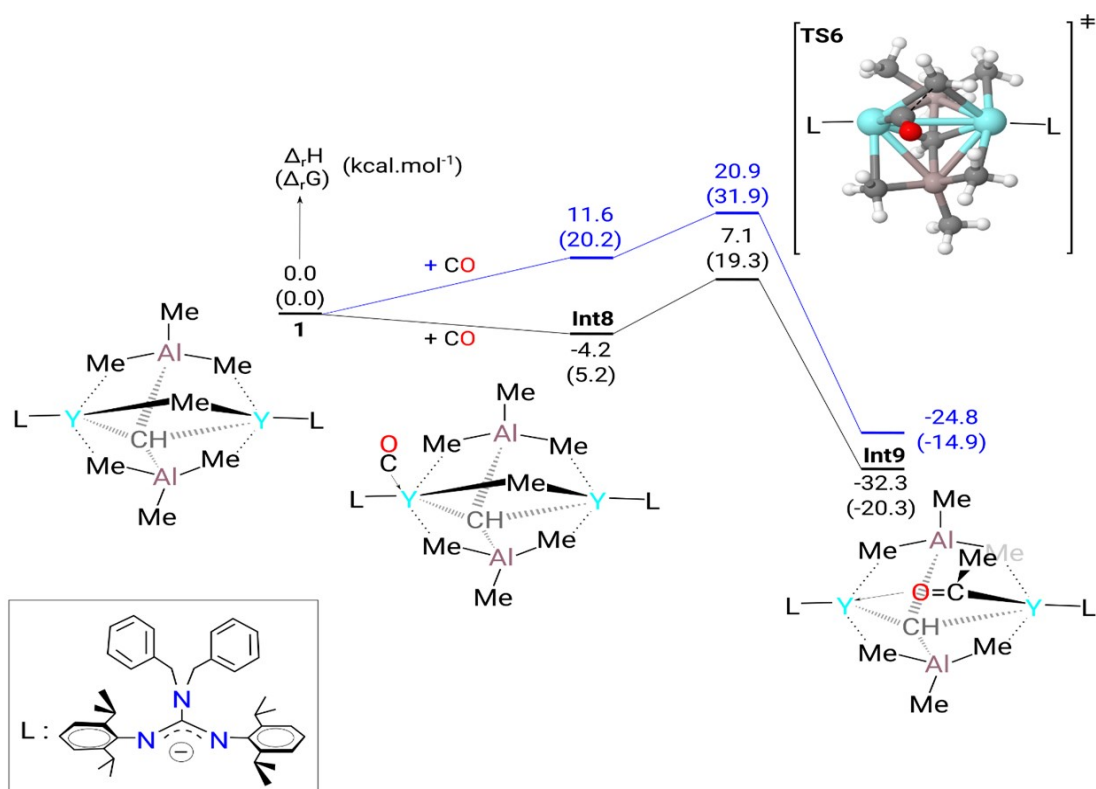

**Fig. S34** Computed enthalpy (Gibbs free energy between bracket) for the alternative route (reaction of the methyl side) for the reaction of CO with complex **1**. The blue pathway does not include dispersion corrections while the black one does

## Optimized geometries

2

CO without dispersion

|   |          |          |         |
|---|----------|----------|---------|
| C | -0.50648 | -1.19461 | 1.60490 |
| O | 0.21272  | -1.92291 | 2.10020 |

## Complex 1 without dispersion

|    |          |          |         |
|----|----------|----------|---------|
| Y  | 0.85448  | 7.96768  | 5.30174 |
| Y  | 2.73890  | 5.31418  | 3.66776 |
| Al | -0.30168 | 5.56027  | 3.85205 |
| Al | 2.47180  | 5.74457  | 6.66055 |
| N  | 0.97858  | 10.43627 | 5.29926 |
| N  | -0.67349 | 9.40030  | 6.41035 |
| N  | -0.48336 | 11.78197 | 6.71447 |
| N  | 3.87426  | 3.34953  | 2.96973 |
| N  | 4.44496  | 5.22557  | 1.88114 |
| N  | 5.34950  | 3.10983  | 1.07522 |
| C  | 2.68556  | 7.90178  | 3.53100 |
| H  | 3.47491  | 7.62562  | 2.80867 |
| H  | 2.02779  | 8.53060  | 2.90787 |
| H  | 3.22472  | 8.61617  | 4.17892 |
| C  | 1.00515  | 5.53462  | 5.34246 |
| H  | 0.44424  | 4.79685  | 5.94750 |
| C  | -0.89927 | 7.52516  | 3.47007 |
| H  | -1.56800 | 8.02394  | 4.18705 |
| H  | -0.29270 | 8.29881  | 2.97276 |
| H  | -1.57934 | 7.19474  | 2.67352 |
| C  | 0.67878  | 5.11209  | 2.06917 |
| H  | -0.24002 | 5.08604  | 1.46808 |
| H  | 1.29747  | 5.85538  | 1.54380 |
| H  | 1.12203  | 4.11790  | 1.89920 |
| C  | -1.97240 | 4.52769  | 4.07241 |
| H  | -2.63829 | 5.03287  | 4.78479 |
| H  | -1.80756 | 3.51565  | 4.45851 |
| H  | -2.53508 | 4.42558  | 3.13448 |
| C  | 4.30774  | 5.66941  | 5.67067 |
| H  | 4.88508  | 5.75619  | 6.60024 |
| H  | 4.65208  | 6.52457  | 5.06914 |
| H  | 4.70930  | 4.75002  | 5.21686 |

|   |          |          |          |
|---|----------|----------|----------|
| C | 2.53341  | 7.71970  | 7.31473  |
| H | 1.68676  | 8.16523  | 7.85962  |
| H | 3.26137  | 7.50850  | 8.11002  |
| H | 3.02151  | 8.51610  | 6.73561  |
| C | 2.53134  | 4.48063  | 8.17799  |
| H | 2.73387  | 3.46105  | 7.82422  |
| H | 1.58870  | 4.43772  | 8.73592  |
| H | 3.32029  | 4.72673  | 8.90176  |
| C | -0.06908 | 10.59228 | 6.13512  |
| C | 0.18395  | 13.06091 | 6.39890  |
| H | 0.40764  | 13.07259 | 5.33399  |
| H | 1.14254  | 13.12039 | 6.92479  |
| C | -0.61905 | 14.29973 | 6.73804  |
| C | -0.22861 | 15.11841 | 7.80341  |
| H | 0.62474  | 14.83073 | 8.41164  |
| C | -0.92000 | 16.29355 | 8.09529  |
| H | -0.59860 | 16.91539 | 8.92638  |
| C | -2.01722 | 16.66879 | 7.32320  |
| H | -2.55752 | 17.58424 | 7.54817  |
| C | -2.41137 | 15.86680 | 6.25251  |
| H | -3.25806 | 16.15715 | 5.63638  |
| C | -1.71373 | 14.69702 | 5.96102  |
| H | -2.02217 | 14.08678 | 5.11856  |
| C | -1.20620 | 11.78374 | 7.98889  |
| H | -1.77688 | 10.85962 | 8.07062  |
| H | -1.94087 | 12.59390 | 7.95692  |
| C | -0.35596 | 11.95194 | 9.23464  |
| C | 0.87599  | 11.31036 | 9.39024  |
| H | 1.27509  | 10.71301 | 8.57597  |
| C | 1.59453  | 11.42390 | 10.57981 |
| H | 2.55046  | 10.91719 | 10.68119 |
| C | 1.08825  | 12.17848 | 11.63689 |
| H | 1.64725  | 12.26542 | 12.56443 |
| C | -0.14010 | 12.82205 | 11.49336 |

|   |          |          |          |
|---|----------|----------|----------|
| H | -0.54309 | 13.41673 | 12.30883 |
| C | -0.85139 | 12.71245 | 10.30016 |
| H | -1.80309 | 13.22745 | 10.19042 |
| C | 1.82576  | 11.39177 | 4.67383  |
| C | 3.06496  | 11.79690 | 5.23807  |
| C | 3.88171  | 12.68508 | 4.52983  |
| H | 4.82449  | 12.99698 | 4.97246  |
| C | 3.52590  | 13.17527 | 3.28146  |
| H | 4.17396  | 13.86990 | 2.75445  |
| C | 2.33415  | 12.74773 | 2.71171  |
| H | 2.05476  | 13.11014 | 1.72546  |
| C | 1.48458  | 11.85628 | 3.37137  |
| C | 3.57896  | 11.28606 | 6.57520  |
| H | 2.79940  | 10.64859 | 7.00411  |
| C | 3.87703  | 12.40797 | 7.58010  |
| H | 2.99529  | 13.01591 | 7.79777  |
| H | 4.66024  | 13.07881 | 7.21105  |
| H | 4.22723  | 11.98510 | 8.52775  |
| C | 4.84308  | 10.43212 | 6.38412  |
| H | 5.16231  | 9.99100  | 7.33503  |
| H | 5.67130  | 11.03998 | 6.00383  |
| H | 4.68442  | 9.62017  | 5.66861  |
| C | 0.21352  | 11.42352 | 2.65640  |
| H | -0.27559 | 10.67535 | 3.28764  |
| C | -0.76496 | 12.59094 | 2.46642  |
| H | -1.03638 | 13.04940 | 3.42095  |
| H | -1.68594 | 12.24892 | 1.98126  |
| H | -0.32923 | 13.37480 | 1.83692  |
| C | 0.51252  | 10.76978 | 1.29935  |
| H | 1.23055  | 9.95029  | 1.39470  |
| H | 0.93475  | 11.49104 | 0.59099  |
| H | -0.40642 | 10.37172 | 0.85476  |
| C | -2.00661 | 9.13559  | 6.82464  |
| C | -3.14554 | 9.50332  | 6.04891  |

|   |          |          |          |
|---|----------|----------|----------|
| C | -4.41002 | 9.05121  | 6.44054  |
| H | -5.27355 | 9.33644  | 5.84532  |
| C | -4.59655 | 8.24503  | 7.55446  |
| H | -5.58908 | 7.89523  | 7.82431  |
| C | -3.49202 | 7.90714  | 8.32362  |
| H | -3.62548 | 7.29312  | 9.21061  |
| C | -2.20792 | 8.34800  | 7.99466  |
| C | -3.08667 | 10.40724 | 4.82591  |
| H | -2.03556 | 10.56542 | 4.56680  |
| C | -3.71203 | 11.77391 | 5.14281  |
| H | -3.22722 | 12.25246 | 5.99595  |
| H | -4.77609 | 11.66551 | 5.38145  |
| H | -3.63481 | 12.44519 | 4.27974  |
| C | -3.78697 | 9.81011  | 3.59491  |
| H | -3.63216 | 10.45733 | 2.72448  |
| H | -4.86840 | 9.72982  | 3.74780  |
| H | -3.41083 | 8.81523  | 3.34805  |
| C | -1.06988 | 7.98944  | 8.93509  |
| H | -0.18808 | 8.53893  | 8.59102  |
| C | -1.34707 | 8.43529  | 10.37838 |
| H | -1.57318 | 9.50374  | 10.43603 |
| H | -0.47028 | 8.24398  | 11.00643 |
| H | -2.18905 | 7.88775  | 10.81610 |
| C | -0.75261 | 6.48946  | 8.89385  |
| H | -0.49914 | 6.15184  | 7.88306  |
| H | -1.61340 | 5.89933  | 9.22869  |
| H | 0.09106  | 6.25298  | 9.55076  |
| C | 4.59872  | 3.88578  | 1.94566  |
| C | 5.05100  | 1.69028  | 0.86999  |
| H | 4.56826  | 1.29785  | 1.76338  |
| H | 6.00166  | 1.15570  | 0.77832  |
| C | 4.19248  | 1.35973  | -0.33622 |
| C | 4.47630  | 0.20783  | -1.07887 |
| H | 5.34929  | -0.38867 | -0.82389 |



|   |          |          |          |
|---|----------|----------|----------|
| C | 3.66122  | -0.17946 | -2.14058 |
| H | 3.89898  | -1.07819 | -2.70340 |
| C | 2.54981  | 0.58855  | -2.48446 |
| H | 1.91420  | 0.29199  | -3.31417 |
| C | 2.26114  | 1.74147  | -1.75615 |
| H | 1.39670  | 2.34668  | -2.01547 |
| C | 3.07476  | 2.12132  | -0.68928 |
| H | 2.83537  | 3.01694  | -0.12321 |
| C | 6.13801  | 3.71786  | -0.01498 |
| H | 6.56968  | 4.64577  | 0.35373  |
| H | 5.47906  | 3.98476  | -0.84880 |
| C | 7.25606  | 2.84987  | -0.55413 |
| C | 7.16899  | 2.31560  | -1.84403 |
| H | 6.27061  | 2.48498  | -2.43140 |
| C | 8.21585  | 1.56849  | -2.38279 |
| H | 8.12797  | 1.16472  | -3.38775 |
| C | 9.36910  | 1.34134  | -1.63517 |
| H | 10.18642 | 0.75960  | -2.05249 |
| C | 9.47186  | 1.87390  | -0.35012 |
| H | 10.37195 | 1.71224  | 0.23685  |
| C | 8.42638  | 2.62558  | 0.18097  |
| H | 8.52051  | 3.04498  | 1.17741  |
| C | 4.05319  | 2.11750  | 3.65639  |
| C | 5.22049  | 1.82698  | 4.41959  |
| C | 5.25992  | 0.65870  | 5.18805  |
| H | 6.15480  | 0.44276  | 5.76609  |
| C | 4.19067  | -0.22372 | 5.24613  |
| H | 4.24283  | -1.11598 | 5.86378  |
| C | 3.05785  | 0.05196  | 4.49337  |
| H | 2.21850  | -0.63814 | 4.51976  |
| C | 2.97180  | 1.19116  | 3.68946  |
| C | 6.46142  | 2.70608  | 4.43560  |
| H | 6.23252  | 3.62981  | 3.89445  |
| C | 7.62749  | 2.01441  | 3.71464  |

|   |          |          |          |
|---|----------|----------|----------|
| H | 7.36431  | 1.74901  | 2.68884  |
| H | 7.91296  | 1.09339  | 4.23500  |
| H | 8.50874  | 2.66588  | 3.68845  |
| C | 6.89988  | 3.08644  | 5.85925  |
| H | 7.69886  | 3.83532  | 5.82274  |
| H | 7.29408  | 2.21879  | 6.39889  |
| H | 6.07603  | 3.49416  | 6.44926  |
| C | 1.71750  | 1.38011  | 2.85343  |
| H | 1.90751  | 2.22095  | 2.17840  |
| C | 1.40523  | 0.15696  | 1.97922  |
| H | 2.25271  | -0.11425 | 1.34364  |
| H | 0.55146  | 0.36935  | 1.32670  |
| H | 1.14303  | -0.71718 | 2.58517  |
| C | 0.51002  | 1.72834  | 3.73200  |
| H | 0.68908  | 2.62455  | 4.33597  |
| H | 0.28439  | 0.90963  | 4.42494  |
| H | -0.38086 | 1.90442  | 3.12003  |
| C | 5.04627  | 6.19079  | 1.02826  |
| C | 4.44199  | 6.60830  | -0.18762 |
| C | 5.05648  | 7.60744  | -0.95005 |
| H | 4.59273  | 7.91397  | -1.88438 |
| C | 6.23388  | 8.22052  | -0.54582 |
| H | 6.69637  | 8.98878  | -1.15911 |
| C | 6.79773  | 7.84844  | 0.66721  |
| H | 7.70632  | 8.33982  | 1.00640  |
| C | 6.22351  | 6.85952  | 1.47005  |
| C | 3.11910  | 6.05333  | -0.69049 |
| H | 2.81327  | 5.25776  | -0.00311 |
| C | 3.21116  | 5.45331  | -2.10028 |
| H | 3.93023  | 4.63185  | -2.15403 |
| H | 3.50948  | 6.20645  | -2.83730 |
| H | 2.23690  | 5.06046  | -2.41077 |
| C | 2.03606  | 7.14430  | -0.66801 |
| H | 1.95436  | 7.61369  | 0.31680  |

|   |         |         |          |
|---|---------|---------|----------|
| H | 1.05757 | 6.72847 | -0.93313 |
| H | 2.26704 | 7.93837 | -1.38672 |
| C | 6.88864 | 6.54744 | 2.80170  |
| H | 6.29285 | 5.77113 | 3.29085  |
| C | 8.31601 | 6.00931 | 2.63143  |
| H | 8.34141 | 5.11743 | 1.99921  |
| H | 8.74681 | 5.74693 | 3.60417  |
| H | 8.97263 | 6.75584 | 2.17086  |
| C | 6.89778 | 7.77929 | 3.71874  |
| H | 5.89407 | 8.19814 | 3.83560  |
| H | 7.53598 | 8.57262 | 3.31393  |
| H | 7.28099 | 7.51925 | 4.71166  |

216

Int1 without dispersion

|   |         |          |          |
|---|---------|----------|----------|
| C | 2.28347 | -5.83490 | -4.48435 |
| C | 3.41601 | -6.12687 | -3.71720 |
| C | 4.34251 | -7.04714 | -4.21718 |
| C | 4.14329 | -7.66416 | -5.45168 |
| C | 3.01455 | -7.36026 | -6.21009 |
| C | 2.08502 | -6.44183 | -5.72264 |
| C | 3.60936 | -5.53232 | -2.33582 |
| N | 3.57110 | -4.06628 | -2.28304 |
| C | 4.51064 | -3.44119 | -3.22256 |
| C | 5.92975 | -3.96754 | -3.14403 |
| C | 6.57799 | -4.40071 | -4.30460 |
| C | 7.90924 | -4.81417 | -4.26778 |
| C | 8.61019 | -4.81036 | -3.06344 |
| C | 7.97276 | -4.38386 | -1.89851 |
| C | 6.64580 | -3.96133 | -1.94263 |
| C | 2.65784 | -3.35459 | -1.52143 |
| N | 1.89334 | -3.91012 | -0.54041 |
| C | 2.02034 | -5.16004 | 0.13313  |
| C | 3.00591 | -5.37606 | 1.13605  |
| C | 2.97993 | -6.55731 | 1.88537  |

|    |          |          |          |
|----|----------|----------|----------|
| C  | 2.01354  | -7.53235 | 1.68905  |
| C  | 1.05958  | -7.33216 | 0.70154  |
| C  | 1.04556  | -6.17812 | -0.08623 |
| C  | 4.09969  | -4.37426 | 1.47222  |
| C  | 5.49802  | -4.98071 | 1.27804  |
| C  | -0.01092 | -6.09210 | -1.17841 |
| C  | 0.05742  | -7.28882 | -2.14074 |
| N  | 2.40049  | -2.03205 | -1.64827 |
| Y  | 0.67132  | -1.94608 | 0.11931  |
| C  | 0.09306  | -3.66793 | 1.94770  |
| O  | -0.30282 | -4.32258 | 2.79608  |
| C  | 2.83404  | -1.10969 | -2.64139 |
| C  | 3.85304  | -0.16598 | -2.32081 |
| C  | 4.21983  | 0.80201  | -3.25940 |
| C  | 3.60841  | 0.88232  | -4.50275 |
| C  | 2.59854  | -0.01868 | -4.80683 |
| C  | 2.19033  | -1.00790 | -3.90538 |
| C  | 4.58925  | -0.16811 | -0.98946 |
| C  | 6.09772  | -0.40377 | -1.15803 |
| C  | 1.03989  | -1.90561 | -4.33339 |
| C  | 1.34626  | -2.66842 | -5.63017 |
| C  | -0.25064 | -1.09180 | -4.52213 |
| C  | 4.36226  | 1.14745  | -0.23048 |
| C  | 2.18336  | -0.88356 | 1.91500  |
| Al | 0.34924  | -0.60942 | 2.88156  |
| C  | -1.13846 | -1.29767 | 1.75005  |
| Al | -2.40091 | -1.83042 | 0.31051  |
| C  | -1.37541 | -2.52882 | -1.35696 |
| Y  | -1.48806 | 0.97705  | 1.00819  |
| C  | -3.27959 | -0.12592 | -0.49684 |
| C  | 0.29137  | 0.56319  | -0.68364 |
| C  | 0.51797  | -1.32624 | 4.71859  |
| C  | 0.23225  | 1.45675  | 2.94877  |
| N  | -1.58958 | 3.39529  | 0.41680  |

|   |          |          |          |
|---|----------|----------|----------|
| C | -2.66217 | 3.64416  | 1.19512  |
| N | -3.20154 | 4.89206  | 1.47363  |
| C | -2.67311 | 6.11505  | 0.83511  |
| C | -3.60252 | 7.31114  | 0.86810  |
| C | -3.34672 | 8.37813  | 1.73678  |
| C | -4.15756 | 9.51229  | 1.73801  |
| C | -5.23980 | 9.59830  | 0.86469  |
| C | -5.49841 | 8.54810  | -0.01548 |
| C | -4.68239 | 7.41917  | -0.01606 |
| N | -3.15918 | 2.50144  | 1.75079  |
| C | -4.47735 | 2.22647  | 2.20022  |
| C | -5.61947 | 2.30231  | 1.34858  |
| C | -6.85346 | 1.84509  | 1.82369  |
| C | -7.00614 | 1.30633  | 3.09332  |
| C | -5.90105 | 1.25514  | 3.93088  |
| C | -4.64861 | 1.71797  | 3.52024  |
| C | -5.60225 | 2.89933  | -0.05247 |
| C | -6.36533 | 4.23198  | -0.07147 |
| C | -3.51529 | 1.68957  | 4.53307  |
| C | -3.86716 | 2.46180  | 5.81307  |
| C | -3.85982 | -3.05565 | 0.83549  |
| C | -0.82175 | 4.26146  | -0.40947 |
| C | 0.33226  | 4.94798  | 0.05563  |
| C | 1.06754  | 5.73420  | -0.83830 |
| C | 0.71471  | 5.85555  | -2.17451 |
| C | -0.38717 | 5.15045  | -2.63941 |
| C | -1.15227 | 4.34518  | -1.79226 |
| C | 0.84989  | 4.84589  | 1.48233  |
| C | 0.99037  | 6.20594  | 2.18111  |
| C | -2.32649 | 3.59135  | -2.39784 |
| C | -3.43429 | 4.53978  | -2.87609 |
| C | 2.20726  | 4.12467  | 1.51217  |
| C | -1.88523 | 2.67780  | -3.55028 |
| C | -6.19846 | 1.96625  | -1.11820 |

|   |          |          |          |
|---|----------|----------|----------|
| C | -3.09756 | 0.25425  | 4.87615  |
| C | 3.97087  | -3.86309 | 2.91712  |
| C | -1.42850 | -5.98982 | -0.59687 |
| C | -3.93314 | 5.13082  | 2.72026  |
| C | -3.11259 | 5.66027  | 3.88230  |
| C | -1.85331 | 5.14221  | 4.19824  |
| C | -1.15704 | 5.59136  | 5.31935  |
| C | -1.71315 | 6.56498  | 6.14782  |
| C | -2.96900 | 7.08797  | 5.84402  |
| C | -3.65873 | 6.64106  | 4.71825  |
| H | 1.09806  | 0.21440  | -1.34587 |
| H | -0.46011 | 0.91105  | -1.41640 |
| H | 0.73220  | 1.49221  | -0.27261 |
| H | -1.64356 | -1.86855 | 2.54895  |
| H | -4.01125 | 0.39216  | 0.13979  |
| H | -2.82398 | 0.62104  | -1.16925 |
| H | -3.89791 | -0.71916 | -1.18405 |
| H | -2.28759 | -2.80562 | -1.90176 |
| H | -0.89544 | -1.78598 | -2.01025 |
| H | -0.77649 | -3.45007 | -1.39850 |
| H | -4.53048 | -2.57672 | 1.56100  |
| H | -3.49287 | -3.97502 | 1.30882  |
| H | -4.48259 | -3.36377 | -0.01502 |
| H | 2.76177  | -0.49464 | 2.76339  |
| H | 2.43990  | -0.21040 | 1.08528  |
| H | 2.67228  | -1.85196 | 1.72287  |
| H | -0.65449 | 1.90673  | 3.42318  |
| H | 1.02083  | 1.58045  | 3.70282  |
| H | 0.55829  | 2.12462  | 2.13938  |
| H | 0.92602  | -2.34499 | 4.72822  |
| H | -0.44141 | -1.37043 | 5.24729  |
| H | 1.19221  | -0.71442 | 5.33366  |
| H | -2.44788 | 5.88269  | -0.20377 |
| H | -1.72788 | 6.40331  | 1.30581  |

|   |          |          |          |
|---|----------|----------|----------|
| H | -2.50476 | 8.31795  | 2.42093  |
| H | -3.93975 | 10.32966 | 2.42007  |
| H | -5.87244 | 10.48170 | 0.86226  |
| H | -6.33084 | 8.61196  | -0.71104 |
| H | -4.88307 | 6.61488  | -0.71623 |
| H | -4.42060 | 4.20553  | 3.02474  |
| H | -4.73719 | 5.84167  | 2.50755  |
| H | -1.41655 | 4.37526  | 3.56598  |
| H | -0.17964 | 5.17517  | 5.54830  |
| H | -1.17147 | 6.91377  | 7.02266  |
| H | -3.41122 | 7.85003  | 6.48025  |
| H | -4.63288 | 7.06180  | 4.47944  |
| H | 1.94371  | 6.26374  | -0.47224 |
| H | 1.29741  | 6.47946  | -2.84643 |
| H | -0.66200 | 5.22194  | -3.68890 |
| H | 0.13301  | 4.24694  | 2.05203  |
| H | 0.04098  | 6.74383  | 2.24249  |
| H | 1.70571  | 6.85131  | 1.66030  |
| H | 1.35614  | 6.07006  | 3.20441  |
| H | 2.53587  | 3.95332  | 2.54332  |
| H | 2.97680  | 4.72239  | 1.01143  |
| H | 2.16762  | 3.15882  | 1.00129  |
| H | -2.74664 | 2.95984  | -1.60858 |
| H | -3.81033 | 5.16245  | -2.05984 |
| H | -4.27838 | 3.97362  | -3.28513 |
| H | -3.07079 | 5.21043  | -3.66274 |
| H | -1.06792 | 2.01680  | -3.24902 |
| H | -1.53345 | 3.25831  | -4.41036 |
| H | -2.72244 | 2.05927  | -3.89298 |
| H | -7.71974 | 1.90790  | 1.17018  |
| H | -7.97408 | 0.94377  | 3.42790  |
| H | -6.01074 | 0.85669  | 4.93629  |
| H | -4.56262 | 3.09709  | -0.33039 |
| H | -5.95252 | 4.94538  | 0.64446  |

|   |          |          |          |
|---|----------|----------|----------|
| H | -7.41997 | 4.07634  | 0.18198  |
| H | -6.33017 | 4.68407  | -1.06932 |
| H | -6.09289 | 2.41630  | -2.11165 |
| H | -7.26810 | 1.79845  | -0.95325 |
| H | -5.70553 | 0.99229  | -1.13350 |
| H | -2.66126 | 2.19566  | 4.07153  |
| H | -4.16096 | 3.49264  | 5.59700  |
| H | -3.00244 | 2.49413  | 6.48473  |
| H | -4.68853 | 1.98386  | 6.35809  |
| H | -2.78665 | -0.30179 | 3.98574  |
| H | -3.92668 | -0.29650 | 5.33501  |
| H | -2.26326 | 0.25306  | 5.58559  |
| H | 2.84422  | -5.92886 | -1.67445 |
| H | 4.57209  | -5.87685 | -1.94094 |
| H | 5.23101  | -7.27737 | -3.63450 |
| H | 4.87402  | -8.37812 | -5.82204 |
| H | 2.85805  | -7.83655 | -7.17403 |
| H | 1.19976  | -6.20204 | -6.30537 |
| H | 1.54928  | -5.13062 | -4.10334 |
| H | 4.52938  | -2.37046 | -3.03915 |
| H | 4.14844  | -3.57791 | -4.24861 |
| H | 6.03208  | -4.41889 | -5.24452 |
| H | 8.39612  | -5.14534 | -5.18111 |
| H | 9.64608  | -5.13661 | -3.03191 |
| H | 8.51071  | -4.37410 | -0.95437 |
| H | 6.15584  | -3.62146 | -1.03589 |
| H | 3.73386  | -6.70828 | 2.65363  |
| H | 2.00656  | -8.43552 | 2.29266  |
| H | 0.30445  | -8.09493 | 0.53016  |
| H | 4.00021  | -3.52093 | 0.79142  |
| H | 5.62781  | -5.39852 | 0.27694  |
| H | 5.67802  | -5.78770 | 1.99643  |
| H | 6.27388  | -4.22343 | 1.43999  |
| H | 4.69430  | -3.06353 | 3.11240  |



|   |          |          |          |
|---|----------|----------|----------|
| H | 4.16877  | -4.66870 | 3.63241  |
| H | 2.97115  | -3.47815 | 3.13352  |
| H | 0.19533  | -5.18542 | -1.75860 |
| H | 1.05491  | -7.42127 | -2.56677 |
| H | -0.64531 | -7.14808 | -2.96956 |
| H | -0.21725 | -8.22158 | -1.63633 |
| H | -1.54630 | -5.13135 | 0.06855  |
| H | -1.67650 | -6.88743 | -0.01969 |
| H | -2.16982 | -5.89532 | -1.39808 |
| H | 2.10257  | 0.04859  | -5.77186 |
| H | 3.90828  | 1.64094  | -5.22024 |
| H | 5.00584  | 1.50866  | -3.00523 |
| H | 0.86816  | -2.63710 | -3.53590 |
| H | 2.25796  | -3.26493 | -5.55285 |
| H | 1.46942  | -1.98125 | -6.47413 |
| H | 0.52039  | -3.34404 | -5.88082 |
| H | -0.47996 | -0.48226 | -3.64430 |
| H | -1.10320 | -1.75265 | -4.71442 |
| H | -0.15974 | -0.40973 | -5.37474 |
| H | 4.18011  | -0.98785 | -0.38957 |
| H | 6.31637  | -1.32713 | -1.69964 |
| H | 6.58662  | -0.46189 | -0.17860 |
| H | 6.56747  | 0.41863  | -1.70894 |
| H | 3.29871  | 1.38234  | -0.13862 |
| H | 4.83417  | 1.98764  | -0.75176 |
| H | 4.79376  | 1.09623  | 0.77522  |

216

TS1 without dispersion

|   |         |          |          |
|---|---------|----------|----------|
| C | 2.48275 | -5.91477 | -4.58076 |
| C | 3.57324 | -6.16432 | -3.74070 |
| C | 4.56825 | -7.04226 | -4.18092 |
| C | 4.47772 | -7.65712 | -5.42932 |
| C | 3.39075 | -7.39473 | -6.26059 |
| C | 2.39223 | -6.52003 | -5.83232 |

|   |          |          |          |
|---|----------|----------|----------|
| C | 3.64543  | -5.56576 | -2.35018 |
| N | 3.60308  | -4.09751 | -2.31560 |
| C | 4.59328  | -3.47632 | -3.20200 |
| C | 6.01304  | -3.97251 | -3.01547 |
| C | 6.76660  | -4.36012 | -4.12749 |
| C | 8.09929  | -4.74586 | -3.98832 |
| C | 8.69508  | -4.76099 | -2.72858 |
| C | 7.95162  | -4.38023 | -1.61175 |
| C | 6.62378  | -3.98373 | -1.75763 |
| C | 2.68590  | -3.38324 | -1.56563 |
| N | 1.89319  | -3.91617 | -0.60474 |
| C | 1.96733  | -5.17837 | 0.05592  |
| C | 2.91762  | -5.42749 | 1.08145  |
| C | 2.88372  | -6.64447 | 1.77049  |
| C | 1.93849  | -7.61975 | 1.49228  |
| C | 1.00238  | -7.37392 | 0.49808  |
| C | 0.99534  | -6.17956 | -0.22613 |
| C | 3.96229  | -4.41537 | 1.52262  |
| C | 5.38775  | -4.98423 | 1.45908  |
| C | -0.06669 | -6.01795 | -1.30176 |
| C | -0.04217 | -7.15614 | -2.33334 |
| N | 2.45113  | -2.04756 | -1.69341 |
| Y | 0.73882  | -1.90769 | -0.01251 |
| C | -0.34432 | -3.04242 | 1.73685  |
| O | -0.70754 | -3.87430 | 2.51675  |
| C | 2.88722  | -1.13192 | -2.69155 |
| C | 3.90099  | -0.18189 | -2.37342 |
| C | 4.27141  | 0.77695  | -3.32011 |
| C | 3.67009  | 0.83968  | -4.56956 |
| C | 2.66606  | -0.06867 | -4.87215 |
| C | 2.25380  | -1.04793 | -3.96186 |
| C | 4.62630  | -0.16816 | -1.03616 |
| C | 6.13621  | -0.40426 | -1.18866 |
| C | 1.10885  | -1.95468 | -4.38466 |

|    |          |          |          |
|----|----------|----------|----------|
| C  | 1.42811  | -2.73629 | -5.66684 |
| C  | -0.18190 | -1.14601 | -4.59393 |
| C  | 4.38996  | 1.15533  | -0.29419 |
| C  | 2.19215  | -0.84734 | 1.86197  |
| Al | 0.41917  | -0.65916 | 2.89849  |
| C  | -1.11971 | -1.44070 | 1.80541  |
| Al | -2.42195 | -1.85149 | 0.28919  |
| C  | -1.40095 | -2.44974 | -1.39070 |
| Y  | -1.45971 | 0.95925  | 1.04685  |
| C  | -3.29289 | -0.10065 | -0.39180 |
| C  | 0.27333  | 0.65716  | -0.68707 |
| C  | 0.60478  | -1.37614 | 4.72239  |
| C  | 0.19124  | 1.39850  | 2.99490  |
| N  | -1.59945 | 3.33394  | 0.43824  |
| C  | -2.65027 | 3.60364  | 1.24332  |
| N  | -3.17424 | 4.85768  | 1.51191  |
| C  | -2.64703 | 6.06873  | 0.85091  |
| C  | -3.56874 | 7.27034  | 0.88345  |
| C  | -3.25093 | 8.37697  | 1.67837  |
| C  | -4.05265 | 9.51781  | 1.67278  |
| C  | -5.18959 | 9.56853  | 0.86927  |
| C  | -5.51292 | 8.47591  | 0.06507  |
| C  | -4.70499 | 7.34144  | 0.06878  |
| N  | -3.12935 | 2.47218  | 1.83346  |
| C  | -4.43378 | 2.19711  | 2.32523  |
| C  | -5.59720 | 2.23324  | 1.49992  |
| C  | -6.80796 | 1.75352  | 2.01137  |
| C  | -6.91808 | 1.23492  | 3.29368  |
| C  | -5.79635 | 1.23695  | 4.11040  |
| C  | -4.56636 | 1.72556  | 3.66313  |
| C  | -5.62940 | 2.82058  | 0.09514  |
| C  | -6.40318 | 4.14761  | 0.09647  |
| C  | -3.41773 | 1.77653  | 4.65764  |
| C  | -3.78397 | 2.57406  | 5.91839  |

|   |          |          |          |
|---|----------|----------|----------|
| C | -3.88933 | -3.05560 | 0.80792  |
| C | -0.84572 | 4.17932  | -0.42448 |
| C | 0.33241  | 4.85009  | 0.00018  |
| C | 1.06751  | 5.59537  | -0.92811 |
| C | 0.68607  | 5.69573  | -2.25818 |
| C | -0.44923 | 5.01717  | -2.67990 |
| C | -1.21527 | 4.25105  | -1.79779 |
| C | 0.86857  | 4.78225  | 1.42239  |
| C | 1.05347  | 6.16291  | 2.06916  |
| C | -2.43736 | 3.53625  | -2.35522 |
| C | -3.52268 | 4.52546  | -2.80352 |
| C | 2.20711  | 4.02795  | 1.46559  |
| C | -2.07938 | 2.59653  | -3.51551 |
| C | -6.25534 | 1.88269  | -0.94903 |
| C | -2.93116 | 0.37477  | 5.04309  |
| C | 3.67368  | -3.92533 | 2.95176  |
| C | -1.46755 | -5.91434 | -0.68026 |
| C | -3.88233 | 5.12155  | 2.76776  |
| C | -3.03950 | 5.68644  | 3.89651  |
| C | -1.77263 | 5.18093  | 4.20276  |
| C | -1.05497 | 5.66646  | 5.29476  |
| C | -1.59687 | 6.66444  | 6.10353  |
| C | -2.85964 | 7.17563  | 5.80871  |
| C | -3.57061 | 6.69262  | 4.71145  |
| H | 1.08150  | 0.30352  | -1.34700 |
| H | -0.46469 | 1.02933  | -1.42059 |
| H | 0.72387  | 1.57850  | -0.26922 |
| H | -1.79415 | -1.68989 | 2.63974  |
| H | -4.01504 | 0.38849  | 0.27631  |
| H | -2.85861 | 0.67057  | -1.05030 |
| H | -3.91957 | -0.67697 | -1.08589 |
| H | -2.28836 | -2.71993 | -1.97826 |
| H | -0.91362 | -1.67923 | -2.00788 |
| H | -0.79667 | -3.36749 | -1.42846 |

|   |          |          |          |
|---|----------|----------|----------|
| H | -4.55775 | -2.57151 | 1.53227  |
| H | -3.52042 | -3.97244 | 1.28116  |
| H | -4.51055 | -3.35683 | -0.04596 |
| H | 2.82474  | -0.45405 | 2.66918  |
| H | 2.39887  | -0.17004 | 1.02047  |
| H | 2.66398  | -1.81998 | 1.65154  |
| H | -0.70947 | 1.82125  | 3.46643  |
| H | 0.96007  | 1.50372  | 3.77171  |
| H | 0.52993  | 2.09739  | 2.21701  |
| H | 0.85531  | -2.44301 | 4.70454  |
| H | -0.31679 | -1.28308 | 5.30879  |
| H | 1.39774  | -0.86637 | 5.28661  |
| H | -2.43624 | 5.82307  | -0.18796 |
| H | -1.69439 | 6.35537  | 1.30705  |
| H | -2.36680 | 8.34368  | 2.30936  |
| H | -3.78592 | 10.36689 | 2.29613  |
| H | -5.81596 | 10.45630 | 0.86241  |
| H | -6.39031 | 8.51082  | -0.57505 |
| H | -4.95797 | 6.50254  | -0.57107 |
| H | -4.35719 | 4.20071  | 3.10414  |
| H | -4.69416 | 5.82316  | 2.55429  |
| H | -1.34597 | 4.39546  | 3.58620  |
| H | -0.07211 | 5.25966  | 5.51722  |
| H | -1.03857 | 7.04133  | 6.95592  |
| H | -3.29069 | 7.95672  | 6.42923  |
| H | -4.55000 | 7.10463  | 4.47911  |
| H | 1.96529  | 6.10980  | -0.59476 |
| H | 1.27021  | 6.28654  | -2.95810 |
| H | -0.75025 | 5.07907  | -3.72269 |
| H | 0.14233  | 4.22494  | 2.02213  |
| H | 0.12360  | 6.73604  | 2.10435  |
| H | 1.79232  | 6.76229  | 1.52683  |
| H | 1.41157  | 6.05434  | 3.09833  |
| H | 2.54890  | 3.89790  | 2.49858  |

|   |          |          |          |
|---|----------|----------|----------|
| H | 2.98292  | 4.58094  | 0.92508  |
| H | 2.13617  | 3.04013  | 1.00251  |
| H | -2.85469 | 2.92903  | -1.54595 |
| H | -3.83882 | 5.17703  | -1.98458 |
| H | -4.40572 | 3.99056  | -3.17036 |
| H | -3.16246 | 5.16800  | -3.61470 |
| H | -1.28422 | 1.89840  | -3.24012 |
| H | -1.73192 | 3.15515  | -4.39146 |
| H | -2.95642 | 2.01655  | -3.82407 |
| H | -7.69003 | 1.78196  | 1.37707  |
| H | -7.86775 | 0.85110  | 3.65553  |
| H | -5.87544 | 0.86277  | 5.12790  |
| H | -4.60045 | 3.02498  | -0.21584 |
| H | -5.97683 | 4.86574  | 0.79952  |
| H | -7.44846 | 3.98297  | 0.38102  |
| H | -6.40111 | 4.59784  | -0.90286 |
| H | -6.17061 | 2.32522  | -1.94779 |
| H | -7.32198 | 1.72339  | -0.75872 |
| H | -5.77038 | 0.90504  | -0.96952 |
| H | -2.59539 | 2.30707  | 4.16673  |
| H | -4.13407 | 3.58066  | 5.67391  |
| H | -2.90876 | 2.67354  | 6.56932  |
| H | -4.56893 | 2.07501  | 6.49679  |
| H | -2.61146 | -0.20091 | 4.16884  |
| H | -3.72721 | -0.19710 | 5.53287  |
| H | -2.08600 | 0.43236  | 5.73711  |
| H | 2.82069  | -5.95379 | -1.75899 |
| H | 4.56662  | -5.91086 | -1.86673 |
| H | 5.42353  | -7.24159 | -3.54027 |
| H | 5.26017  | -8.33830 | -5.75284 |
| H | 3.31914  | -7.87073 | -7.23469 |
| H | 1.53731  | -6.31444 | -6.47078 |
| H | 1.69628  | -5.24534 | -4.24462 |
| H | 4.57956  | -2.40130 | -3.04478 |

|   |          |          |          |
|---|----------|----------|----------|
| H | 4.30316  | -3.64373 | -4.24623 |
| H | 6.30201  | -4.36528 | -5.11044 |
| H | 8.66919  | -5.04205 | -4.86491 |
| H | 9.73146  | -5.06745 | -2.61676 |
| H | 8.40678  | -4.38696 | -0.62502 |
| H | 6.05058  | -3.67838 | -0.88795 |
| H | 3.61207  | -6.82328 | 2.55717  |
| H | 1.92678  | -8.55416 | 2.04638  |
| H | 0.25236  | -8.12822 | 0.27509  |
| H | 3.91083  | -3.55661 | 0.84254  |
| H | 5.61712  | -5.40741 | 0.47790  |
| H | 5.52960  | -5.77837 | 2.19980  |
| H | 6.12473  | -4.20296 | 1.67981  |
| H | 4.36282  | -3.12214 | 3.23799  |
| H | 3.80216  | -4.74280 | 3.66953  |
| H | 2.64896  | -3.56178 | 3.06053  |
| H | 0.15310  | -5.08499 | -1.83373 |
| H | 0.94307  | -7.28158 | -2.79003 |
| H | -0.76221 | -6.95650 | -3.13548 |
| H | -0.32226 | -8.11262 | -1.87897 |
| H | -1.51678 | -5.13809 | 0.08605  |
| H | -1.74433 | -6.85962 | -0.20022 |
| H | -2.22076 | -5.69963 | -1.44707 |
| H | 2.17844  | -0.01486 | -5.84227 |
| H | 3.97377  | 1.59044  | -5.29374 |
| H | 5.05319  | 1.48918  | -3.06832 |
| H | 0.93349  | -2.67523 | -3.57809 |
| H | 2.34559  | -3.32153 | -5.57374 |
| H | 1.54942  | -2.06205 | -6.52156 |
| H | 0.61013  | -3.42409 | -5.91027 |
| H | -0.41404 | -0.51873 | -3.72899 |
| H | -1.03349 | -1.81097 | -4.77591 |
| H | -0.08871 | -0.48065 | -5.45942 |
| H | 4.21316  | -0.98220 | -0.43121 |

|   |         |          |          |
|---|---------|----------|----------|
| H | 6.35997 | -1.33999 | -1.70631 |
| H | 6.61753 | -0.44063 | -0.20448 |
| H | 6.60863 | 0.40688  | -1.75387 |
| H | 3.32535 | 1.39233  | -0.21992 |
| H | 4.86948 | 1.98996  | -0.81752 |
| H | 4.80787 | 1.11447  | 0.71767  |

216

Int2 without dispersion

|   |          |          |          |
|---|----------|----------|----------|
| C | 2.59929  | -5.94442 | -4.69305 |
| C | 3.64041  | -6.16495 | -3.78467 |
| C | 4.68544  | -7.01415 | -4.16064 |
| C | 4.69321  | -7.62761 | -5.41295 |
| C | 3.65529  | -7.39343 | -6.31239 |
| C | 2.60676  | -6.54843 | -5.94845 |
| C | 3.60573  | -5.56920 | -2.39194 |
| N | 3.58261  | -4.09953 | -2.35789 |
| C | 4.62818  | -3.48807 | -3.18358 |
| C | 6.03215  | -3.98786 | -2.90775 |
| C | 6.87198  | -4.32565 | -3.97337 |
| C | 8.19162  | -4.71430 | -3.74732 |
| C | 8.68760  | -4.78278 | -2.44659 |
| C | 7.85758  | -4.45121 | -1.37603 |
| C | 6.54311  | -4.05106 | -1.60792 |
| C | 2.66857  | -3.37357 | -1.61533 |
| N | 1.84485  | -3.89288 | -0.67569 |
| C | 1.88091  | -5.16863 | -0.03768 |
| C | 2.80096  | -5.45199 | 1.00513  |
| C | 2.74711  | -6.69086 | 1.65242  |
| C | 1.80850  | -7.65412 | 1.31506  |
| C | 0.89451  | -7.37029 | 0.31042  |
| C | 0.90812  | -6.15157 | -0.37166 |
| C | 3.81008  | -4.44092 | 1.52249  |
| C | 5.23564  | -5.00568 | 1.60766  |
| C | -0.13967 | -5.93595 | -1.45083 |



|    |          |          |          |
|----|----------|----------|----------|
| C  | -0.14171 | -7.04416 | -2.51450 |
| N  | 2.47295  | -2.02964 | -1.73469 |
| Y  | 0.74000  | -1.84039 | -0.09649 |
| C  | -0.42572 | -2.87671 | 1.68658  |
| O  | -0.72497 | -3.80002 | 2.42316  |
| C  | 2.92432  | -1.12386 | -2.73395 |
| C  | 3.93722  | -0.17511 | -2.40882 |
| C  | 4.32635  | 0.77335  | -3.35844 |
| C  | 3.74421  | 0.82727  | -4.61745 |
| C  | 2.74062  | -0.07930 | -4.92709 |
| C  | 2.31058  | -1.04866 | -4.01451 |
| C  | 4.64189  | -0.15371 | -1.06075 |
| C  | 6.14854  | -0.42392 | -1.18542 |
| C  | 1.16696  | -1.95328 | -4.44492 |
| C  | 1.49958  | -2.74595 | -5.71673 |
| C  | -0.11680 | -1.13944 | -4.67648 |
| C  | 4.42026  | 1.18551  | -0.34297 |
| C  | 2.18140  | -0.77811 | 1.79526  |
| Al | 0.43255  | -0.65764 | 2.86778  |
| C  | -1.14535 | -1.44901 | 1.79832  |
| Al | -2.43974 | -1.83338 | 0.23995  |
| C  | -1.41797 | -2.34265 | -1.46181 |
| Y  | -1.48050 | 0.97631  | 1.05290  |
| C  | -3.33503 | -0.06669 | -0.35674 |
| C  | 0.23442  | 0.73220  | -0.71292 |
| C  | 0.62772  | -1.39286 | 4.67989  |
| C  | 0.16744  | 1.39650  | 2.99338  |
| N  | -1.65938 | 3.32357  | 0.43303  |
| C  | -2.68910 | 3.60246  | 1.26416  |
| N  | -3.20691 | 4.85902  | 1.52743  |
| C  | -2.69180 | 6.06102  | 0.84170  |
| C  | -3.61215 | 7.26333  | 0.87944  |
| C  | -3.27054 | 8.38372  | 1.64454  |
| C  | -4.07164 | 9.52505  | 1.64154  |

|   |          |          |          |
|---|----------|----------|----------|
| C | -5.23182 | 9.56202  | 0.87123  |
| C | -5.57991 | 8.45476  | 0.09793  |
| C | -4.77284 | 7.31967  | 0.09868  |
| N | -3.14554 | 2.47814  | 1.88319  |
| C | -4.43311 | 2.20364  | 2.42020  |
| C | -5.62123 | 2.22288  | 1.62990  |
| C | -6.81331 | 1.74230  | 2.18252  |
| C | -6.88233 | 1.23996  | 3.47405  |
| C | -5.73731 | 1.26067  | 4.25733  |
| C | -4.52382 | 1.75051  | 3.76801  |
| C | -5.69888 | 2.79311  | 0.22025  |
| C | -6.47336 | 4.11981  | 0.22827  |
| C | -3.35050 | 1.82620  | 4.73148  |
| C | -3.68659 | 2.65783  | 5.97887  |
| C | -3.88595 | -3.06227 | 0.74911  |
| C | -0.93011 | 4.14926  | -0.46960 |
| C | 0.27115  | 4.80850  | -0.09549 |
| C | 0.99574  | 5.51166  | -1.06405 |
| C | 0.57951  | 5.58274  | -2.38558 |
| C | -0.58593 | 4.92502  | -2.75497 |
| C | -1.34461 | 4.20231  | -1.83090 |
| C | 0.83712  | 4.77996  | 1.31688  |
| C | 1.04533  | 6.18080  | 1.91182  |
| C | -2.60984 | 3.52013  | -2.33073 |
| C | -3.66068 | 4.54028  | -2.79372 |
| C | 2.17053  | 4.01734  | 1.36337  |
| C | -2.32760 | 2.52149  | -3.46246 |
| C | -6.35687 | 1.84226  | -0.79211 |
| C | -2.85536 | 0.43546  | 5.14536  |
| C | 3.37535  | -3.93116 | 2.90652  |
| C | -1.53726 | -5.81029 | -0.82628 |
| C | -3.88329 | 5.14058  | 2.79707  |
| C | -3.01109 | 5.72298  | 3.89406  |
| C | -1.73366 | 5.22692  | 4.17084  |

|   |          |          |          |
|---|----------|----------|----------|
| C | -0.98694 | 5.73113  | 5.23448  |
| C | -1.50977 | 6.73840  | 6.04432  |
| C | -2.78292 | 7.23998  | 5.77908  |
| C | -3.52295 | 6.73857  | 4.70965  |
| H | 1.03560  | 0.36522  | -1.37634 |
| H | -0.50044 | 1.11352  | -1.44383 |
| H | 0.69920  | 1.64903  | -0.30361 |
| H | -1.87205 | -1.57607 | 2.62388  |
| H | -4.03234 | 0.41396  | 0.34309  |
| H | -2.91782 | 0.71351  | -1.01548 |
| H | -3.98841 | -0.62761 | -1.03854 |
| H | -2.30236 | -2.59976 | -2.06001 |
| H | -0.94174 | -1.54170 | -2.04909 |
| H | -0.80537 | -3.25290 | -1.53420 |
| H | -4.57473 | -2.58261 | 1.45723  |
| H | -3.49948 | -3.96116 | 1.24126  |
| H | -4.48716 | -3.38936 | -0.10943 |
| H | 2.81968  | -0.38223 | 2.59716  |
| H | 2.35230  | -0.07713 | 0.96514  |
| H | 2.67410  | -1.73397 | 1.55894  |
| H | -0.73284 | 1.81257  | 3.47054  |
| H | 0.93453  | 1.48967  | 3.77358  |
| H | 0.50799  | 2.10773  | 2.22706  |
| H | 0.82401  | -2.47012 | 4.64975  |
| H | -0.27768 | -1.25809 | 5.28316  |
| H | 1.45476  | -0.92349 | 5.22992  |
| H | -2.50042 | 5.80335  | -0.19806 |
| H | -1.73073 | 6.35147  | 1.27729  |
| H | -2.36890 | 8.36025  | 2.25080  |
| H | -3.78649 | 10.38510 | 2.24124  |
| H | -5.85771 | 10.45013 | 0.86653  |
| H | -6.47650 | 8.47839  | -0.51555 |
| H | -5.04648 | 6.46817  | -0.51554 |
| H | -4.34899 | 4.22444  | 3.15852  |

|   |          |         |          |
|---|----------|---------|----------|
| H | -4.69993 | 5.83960 | 2.59364  |
| H | -1.32118 | 4.43398 | 3.55415  |
| H | 0.00371  | 5.33152 | 5.43435  |
| H | -0.92875 | 7.12984 | 6.87467  |
| H | -3.19947 | 8.02800 | 6.40070  |
| H | -4.51047 | 7.14327 | 4.49996  |
| H | 1.91296  | 6.01543 | -0.76994 |
| H | 1.15788  | 6.13803 | -3.11853 |
| H | -0.91741 | 4.96921 | -3.78943 |
| H | 0.11776  | 4.25026 | 1.94936  |
| H | 0.12298  | 6.76641 | 1.93551  |
| H | 1.78445  | 6.75099 | 1.33926  |
| H | 1.41413  | 6.10507 | 2.94011  |
| H | 2.53468  | 3.93168 | 2.39340  |
| H | 2.93810  | 4.53863 | 0.78140  |
| H | 2.08274  | 3.00982 | 0.94836  |
| H | -3.03403 | 2.96306 | -1.48990 |
| H | -3.91114 | 5.25290 | -2.00346 |
| H | -4.58336 | 4.03384 | -3.09817 |
| H | -3.30056 | 5.11721 | -3.65271 |
| H | -1.57287 | 1.78423 | -3.17563 |
| H | -1.96111 | 3.02845 | -4.36164 |
| H | -3.24325 | 1.98619 | -3.73763 |
| H | -7.71343 | 1.75674 | 1.57373  |
| H | -7.81824 | 0.85474 | 3.86873  |
| H | -5.78415 | 0.90069 | 5.28192  |
| H | -4.68013 | 2.99428 | -0.12421 |
| H | -6.02593 | 4.84809 | 0.90730  |
| H | -7.50891 | 3.95835 | 0.54808  |
| H | -6.50347 | 4.55619 | -0.77675 |
| H | -6.28919 | 2.26454 | -1.80089 |
| H | -7.42084 | 1.69875 | -0.57606 |
| H | -5.88376 | 0.85872 | -0.80396 |
| H | -2.54078 | 2.34366 | 4.20717  |

|   |          |          |          |
|---|----------|----------|----------|
| H | -4.03982 | 3.65867  | 5.71623  |
| H | -2.79689 | 2.77211  | 6.60735  |
| H | -4.45966 | 2.17576  | 6.58693  |
| H | -2.56696 | -0.17113 | 4.28131  |
| H | -3.63604 | -0.11689 | 5.68000  |
| H | -1.98765 | 0.51200  | 5.80905  |
| H | 2.72692  | -5.94283 | -1.87464 |
| H | 4.47613  | -5.93155 | -1.83267 |
| H | 5.50198  | -7.19329 | -3.46588 |
| H | 5.51331  | -8.28642 | -5.68552 |
| H | 3.65965  | -7.86896 | -7.28935 |
| H | 1.78878  | -6.36574 | -6.64013 |
| H | 1.77374  | -5.29902 | -4.40786 |
| H | 4.60997  | -2.41211 | -3.03255 |
| H | 4.40061  | -3.65844 | -4.24279 |
| H | 6.48527  | -4.29062 | -4.98900 |
| H | 8.82937  | -4.97204 | -4.58864 |
| H | 9.71346  | -5.09260 | -2.26742 |
| H | 8.23426  | -4.49984 | -0.35788 |
| H | 5.90105  | -3.78501 | -0.77404 |
| H | 3.45172  | -6.89655 | 2.45393  |
| H | 1.78187  | -8.60741 | 1.83552  |
| H | 0.14549  | -8.11233 | 0.04674  |
| H | 3.82483  | -3.59288 | 0.82707  |
| H | 5.55213  | -5.46776 | 0.66885  |
| H | 5.31617  | -5.76614 | 2.39145  |
| H | 5.94777  | -4.21110 | 1.85994  |
| H | 4.03307  | -3.12709 | 3.25752  |
| H | 3.42108  | -4.74312 | 3.64053  |
| H | 2.34497  | -3.56762 | 2.89632  |
| H | 0.10809  | -4.99490 | -1.95571 |
| H | 0.84232  | -7.18473 | -2.97015 |
| H | -0.85213 | -6.80140 | -3.31343 |
| H | -0.45087 | -8.00556 | -2.09044 |

|   |          |          |          |
|---|----------|----------|----------|
| H | -1.55854 | -5.06126 | -0.03184 |
| H | -1.84207 | -6.76293 | -0.37870 |
| H | -2.28438 | -5.54613 | -1.58379 |
| H | 2.26761  | -0.03167 | -5.90478 |
| H | 4.06227  | 1.56996  | -5.34381 |
| H | 5.10793  | 1.48412  | -3.10175 |
| H | 0.97783  | -2.66733 | -3.63583 |
| H | 2.41633  | -3.32965 | -5.60798 |
| H | 1.63056  | -2.07893 | -6.57570 |
| H | 0.68418  | -3.43563 | -5.96363 |
| H | -0.35206 | -0.49948 | -3.82168 |
| H | -0.97110 | -1.80108 | -4.85775 |
| H | -0.01127 | -0.48564 | -5.54937 |
| H | 4.20310  | -0.94976 | -0.45027 |
| H | 6.35982  | -1.38051 | -1.66912 |
| H | 6.61637  | -0.43928 | -0.19420 |
| H | 6.64396  | 0.35959  | -1.76970 |
| H | 3.35987  | 1.44769  | -0.29516 |
| H | 4.93020  | 2.00197  | -0.86633 |
| H | 4.81541  | 1.14943  | 0.67816  |

216

TS2 without dispersion

|   |         |         |          |
|---|---------|---------|----------|
| C | 6.11884 | 6.81316 | 1.32081  |
| C | 5.02596 | 5.97400 | 0.95162  |
| C | 4.48736 | 6.10892 | -0.35732 |
| C | 5.06334 | 7.01987 | -1.25001 |
| C | 6.14443 | 7.81298 | -0.89778 |
| C | 6.65563 | 7.70401 | 0.38747  |
| N | 4.43779 | 5.12007 | 1.93232  |
| C | 4.63521 | 3.80164 | 2.18257  |
| N | 5.52684 | 2.97788 | 1.51595  |
| C | 6.44915 | 3.47815 | 0.48363  |
| C | 7.74585 | 2.70381 | 0.36060  |
| C | 8.09474 | 2.11985 | -0.86107 |

|    |          |          |          |
|----|----------|----------|----------|
| C  | 9.31744  | 1.46794  | -1.01990 |
| C  | 10.20858 | 1.38316  | 0.04752  |
| C  | 9.87146  | 1.96048  | 1.27171  |
| C  | 8.65340  | 2.61892  | 1.42263  |
| C  | 3.27584  | 5.33719  | -0.85583 |
| C  | 2.10648  | 6.29486  | -1.14162 |
| C  | 6.76351  | 6.77968  | 2.69796  |
| C  | 6.71398  | 8.15805  | 3.37487  |
| Y  | 2.59666  | 5.36685  | 3.51591  |
| C  | 4.16112  | 6.54252  | 5.22250  |
| Al | 2.47720  | 6.31998  | 6.36636  |
| C  | 2.78457  | 5.72561  | 8.21484  |
| Y  | 0.37712  | 8.09984  | 4.42885  |
| C  | 1.93140  | 8.32780  | 6.48317  |
| Al | -0.58253 | 5.38796  | 3.14808  |
| C  | -2.19823 | 4.27466  | 3.32796  |
| N  | 0.17283  | 10.48624 | 4.01159  |
| C  | 0.92581  | 11.42204 | 3.24712  |
| C  | 2.08286  | 12.06397 | 3.76308  |
| C  | 2.82021  | 12.91496 | 2.93236  |
| C  | 2.46338  | 13.14251 | 1.61114  |
| C  | 1.35460  | 12.48461 | 1.09588  |
| C  | 0.58638  | 11.61915 | 1.87861  |
| C  | 2.59638  | 11.84934 | 5.17864  |
| C  | 3.95381  | 11.12738 | 5.16455  |
| C  | -0.59397 | 10.92292 | 1.21859  |
| C  | -0.15262 | 10.07362 | 0.01742  |
| N  | -1.34649 | 9.46289  | 5.30666  |
| C  | -2.63331 | 9.09636  | 5.79377  |
| C  | -3.79735 | 9.11357  | 4.97089  |
| C  | -4.98741 | 8.56743  | 5.46279  |
| C  | -5.07222 | 7.99378  | 6.72334  |
| C  | -3.94745 | 8.00226  | 7.53548  |
| C  | -2.73856 | 8.55839  | 7.10888  |

|   |          |          |         |
|---|----------|----------|---------|
| C | -3.84721 | 9.73314  | 3.58172 |
| C | -4.46511 | 8.79932  | 2.52792 |
| C | -1.59253 | 8.60562  | 8.10734 |
| C | -1.05076 | 7.20674  | 8.42927 |
| C | 2.27815  | 7.88992  | 2.79694 |
| C | 0.39281  | 5.70944  | 4.93101 |
| C | -1.17909 | 7.26023  | 2.51788 |
| N | 3.81642  | 3.36552  | 3.17940 |
| C | 3.94611  | 2.22010  | 4.02183 |
| C | 4.97475  | 2.11893  | 4.99699 |
| C | 4.96929  | 1.04260  | 5.89032 |
| C | 3.98227  | 0.06849  | 5.86201 |
| C | 2.98420  | 0.16010  | 4.90298 |
| C | 2.94936  | 1.20524  | 3.97749 |
| C | 6.09718  | 3.13265  | 5.14588 |
| C | 6.05455  | 3.82542  | 6.51679 |
| C | 1.83820  | 1.19282  | 2.94146 |
| C | 0.47012  | 1.45553  | 3.58567 |
| C | 0.72455  | 4.73382  | 1.73282 |
| C | -0.90243 | 10.65592 | 4.81561 |
| N | -1.47558 | 11.86666 | 5.16152 |
| C | -2.24557 | 12.01360 | 6.39932 |
| C | -1.48473 | 12.56626 | 7.58986 |
| C | -0.17812 | 12.17105 | 7.88897 |
| C | 0.46274  | 12.63660 | 9.03649 |
| C | -0.19677 | 13.50279 | 9.90695 |
| C | -1.50068 | 13.90323 | 9.61886 |
| C | -2.13497 | 13.44188 | 8.46711 |
| C | -0.99095 | 13.14240 | 4.59453 |
| C | -1.97458 | 14.29127 | 4.67984 |
| C | -1.73171 | 15.35907 | 5.55032 |
| C | -2.59412 | 16.45359 | 5.59982 |
| C | -3.71730 | 16.49568 | 4.77676 |
| C | -3.96697 | 15.44137 | 3.89859 |



|   |          |          |          |
|---|----------|----------|----------|
| C | -3.09924 | 14.35302 | 3.84827  |
| C | 5.37318  | 1.51894  | 1.49315  |
| C | 4.85341  | 0.94437  | 0.18920  |
| C | 5.48631  | -0.16484 | -0.38192 |
| C | 4.97558  | -0.76790 | -1.53056 |
| C | 3.82475  | -0.26244 | -2.13231 |
| C | 3.18905  | 0.84643  | -1.57525 |
| C | 3.69908  | 1.44229  | -0.42356 |
| C | 2.72863  | 13.15433 | 5.97697  |
| C | -1.68235 | 11.91439 | 0.78361  |
| C | -4.63870 | 11.04903 | 3.60794  |
| C | -1.99205 | 9.32385  | 9.40556  |
| C | 7.47239  | 2.48096  | 4.94047  |
| C | 1.79698  | -0.11854 | 2.14256  |
| C | 3.57304  | 4.51349  | -2.11675 |
| C | 8.21858  | 6.29032  | 2.64556  |
| H | 3.20277  | 7.54689  | 2.30103  |
| H | 1.66559  | 8.21479  | 1.94083  |
| H | 2.62854  | 8.83320  | 3.25839  |
| H | -0.58278 | 5.67203  | 5.47103  |
| H | -1.87915 | 7.85395  | 3.12420  |
| H | -0.51810 | 7.95109  | 1.97465  |
| H | -1.82309 | 6.85928  | 1.72352  |
| H | -0.01746 | 4.51915  | 0.95145  |
| H | 1.40939  | 5.43419  | 1.23486  |
| H | 1.23856  | 3.77105  | 1.86724  |
| H | -2.96538 | 4.79303  | 3.91832  |
| H | -1.99807 | 3.32518  | 3.83604  |
| H | -2.65251 | 4.03397  | 2.35674  |
| H | 4.74202  | 6.90171  | 6.08393  |
| H | 4.24699  | 7.34291  | 4.48113  |
| H | 4.74654  | 5.67726  | 4.87734  |
| H | 0.96273  | 8.66199  | 6.88634  |
| H | 2.61385  | 8.49709  | 7.32684  |

|   |          |          |          |
|---|----------|----------|----------|
| H | 2.28125  | 9.07153  | 5.74968  |
| H | 3.12605  | 4.68562  | 8.23871  |
| H | 1.85467  | 5.75758  | 8.79451  |
| H | 3.52323  | 6.34363  | 8.74351  |
| H | -0.74332 | 12.97571 | 3.54828  |
| H | -0.06486 | 13.44435 | 5.09473  |
| H | -0.85910 | 15.33163 | 6.19723  |
| H | -2.38589 | 17.27312 | 6.28215  |
| H | -4.39073 | 17.34756 | 4.81295  |
| H | -4.83397 | 15.47043 | 3.24421  |
| H | -3.29735 | 13.54286 | 3.15406  |
| H | -2.66924 | 11.04634 | 6.66548  |
| H | -3.09468 | 12.67189 | 6.19264  |
| H | 0.34151  | 11.49050 | 7.22095  |
| H | 1.47887  | 12.31786 | 9.25252  |
| H | 0.30207  | 13.86358 | 10.80206 |
| H | -2.02368 | 14.58144 | 10.28774 |
| H | -3.14778 | 13.76784 | 8.24157  |
| H | 3.70039  | 13.40956 | 3.33535  |
| H | 3.04834  | 13.81303 | 0.98797  |
| H | 1.07722  | 12.64125 | 0.05641  |
| H | 1.87626  | 11.20849 | 5.69795  |
| H | 1.77684  | 13.68361 | 6.06952  |
| H | 3.44596  | 13.83728 | 5.50986  |
| H | 3.08871  | 12.94521 | 6.98992  |
| H | 4.28155  | 10.89503 | 6.18398  |
| H | 4.72411  | 11.75386 | 4.70198  |
| H | 3.91590  | 10.19306 | 4.59693  |
| H | -1.03248 | 10.24985 | 1.96136  |
| H | -2.04236 | 12.51488 | 1.62322  |
| H | -2.53955 | 11.38242 | 0.35599  |
| H | -1.30874 | 12.60737 | 0.02153  |
| H | 0.64369  | 9.37425  | 0.28830  |
| H | 0.22928  | 10.69897 | -0.79703 |

|   |          |          |          |
|---|----------|----------|----------|
| H | -0.99694 | 9.49775  | -0.37749 |
| H | -5.87061 | 8.58384  | 4.82991  |
| H | -6.00463 | 7.55834  | 7.07134  |
| H | -4.00680 | 7.57805  | 8.53435  |
| H | -2.82248 | 9.96106  | 3.27038  |
| H | -4.21680 | 11.76022 | 4.32037  |
| H | -5.68011 | 10.86631 | 3.89569  |
| H | -4.64643 | 11.51586 | 2.61615  |
| H | -4.33280 | 9.22133  | 1.52557  |
| H | -5.54204 | 8.67730  | 2.68532  |
| H | -4.01662 | 7.80357  | 2.54127  |
| H | -0.79213 | 9.19525  | 7.64822  |
| H | -2.38902 | 10.32386 | 9.21142  |
| H | -1.12029 | 9.43065  | 10.05983 |
| H | -2.75089 | 8.76110  | 9.95986  |
| H | -0.70681 | 6.67734  | 7.53598  |
| H | -1.82434 | 6.58441  | 8.89229  |
| H | -0.21085 | 7.26749  | 9.12943  |
| H | 4.71015  | 1.22213  | 2.30289  |
| H | 6.34678  | 1.06890  | 1.71135  |
| H | 6.39011  | -0.55685 | 0.07840  |
| H | 5.48104  | -1.63014 | -1.95720 |
| H | 3.42505  | -0.72912 | -3.02837 |
| H | 2.28891  | 1.24503  | -2.03521 |
| H | 3.18935  | 2.29782  | 0.01101  |
| H | 6.68999  | 4.51411  | 0.70865  |
| H | 5.95332  | 3.47481  | -0.49417 |
| H | 7.39950  | 2.17342  | -1.69492 |
| H | 9.56990  | 1.02268  | -1.97845 |
| H | 11.16033 | 0.87306  | -0.07290 |
| H | 10.56090 | 1.90414  | 2.10979  |
| H | 8.40125  | 3.07011  | 2.37641  |
| H | 5.75623  | 0.97839  | 6.63762  |
| H | 3.99128  | -0.74946 | 6.57693  |

|   |          |          |          |
|---|----------|----------|----------|
| H | 2.20749  | -0.59895 | 4.86663  |
| H | 5.97140  | 3.89720  | 4.37166  |
| H | 7.51883  | 1.92750  | 3.99942  |
| H | 7.69744  | 1.77429  | 5.74666  |
| H | 8.26550  | 3.23798  | 4.94075  |
| H | 6.80405  | 4.62371  | 6.57180  |
| H | 6.27275  | 3.11371  | 7.32030  |
| H | 5.07263  | 4.25644  | 6.72473  |
| H | 2.05516  | 2.00073  | 2.23416  |
| H | 2.75803  | -0.34595 | 1.67394  |
| H | 1.04442  | -0.05398 | 1.34888  |
| H | 1.52465  | -0.96602 | 2.78072  |
| H | 0.47124  | 2.35601  | 4.20467  |
| H | 0.19084  | 0.62495  | 4.24399  |
| H | -0.30870 | 1.54832  | 2.82043  |
| H | 4.64482  | 7.11012  | -2.24908 |
| H | 6.57679  | 8.50998  | -1.61019 |
| H | 7.49762  | 8.32655  | 0.67939  |
| H | 2.96866  | 4.64668  | -0.06412 |
| H | 4.36738  | 3.78095  | -1.95497 |
| H | 3.87419  | 5.15620  | -2.95075 |
| H | 2.67831  | 3.96652  | -2.43346 |
| H | 1.88743  | 6.93739  | -0.28379 |
| H | 1.19843  | 5.73717  | -1.39646 |
| H | 2.34068  | 6.95225  | -1.98592 |
| H | 6.19190  | 6.07706  | 3.30979  |
| H | 8.30783  | 5.30889  | 2.17372  |
| H | 8.63570  | 6.21970  | 3.65657  |
| H | 8.84898  | 6.98286  | 2.07669  |
| H | 5.70654  | 8.58246  | 3.35999  |
| H | 7.37457  | 8.87128  | 2.86939  |
| H | 7.04215  | 8.08786  | 4.41759  |
| C | 1.29331  | 4.71719  | 5.54012  |
| O | 0.96050  | 3.80124  | 6.30488  |

## Int3 without dispersion

|    |          |          |          |
|----|----------|----------|----------|
| C  | 4.05858  | 0.05464  | -2.68334 |
| C  | 3.04514  | -0.93681 | -2.77825 |
| C  | 2.27810  | -1.03584 | -3.96898 |
| C  | 2.54006  | -0.15503 | -5.02144 |
| C  | 3.52809  | 0.81855  | -4.92962 |
| C  | 4.27627  | 0.91414  | -3.76429 |
| N  | 2.74068  | -1.70545 | -1.62427 |
| C  | 2.89924  | -3.03144 | -1.37348 |
| N  | 3.61121  | -3.90497 | -2.16823 |
| C  | 4.46261  | -3.46577 | -3.28379 |
| C  | 5.86467  | -4.03955 | -3.29219 |
| C  | 6.29950  | -4.82337 | -4.36531 |
| C  | 7.61455  | -5.28313 | -4.42737 |
| C  | 8.51431  | -4.96616 | -3.41188 |
| C  | 8.09297  | -4.18181 | -2.33827 |
| C  | 6.77976  | -3.72014 | -2.28374 |
| C  | 1.14133  | -2.03555 | -4.10362 |
| C  | -0.19758 | -1.37372 | -3.75326 |
| C  | 4.92752  | 0.20766  | -1.44423 |
| C  | 4.64761  | 1.53208  | -0.71841 |
| Y  | 1.29647  | -1.25171 | 0.20898  |
| C  | 2.65662  | -0.45476 | 2.14215  |
| Al | 1.04161  | -1.23250 | 3.30537  |
| C  | 1.67036  | -2.70470 | 4.44403  |
| Y  | -1.70652 | 0.74888  | 0.18247  |
| C  | 0.23270  | 0.36153  | 4.14587  |
| Al | -3.54915 | -1.59073 | -0.58071 |
| C  | -5.41644 | -1.56988 | 0.05916  |
| N  | -1.61102 | 3.14527  | 0.22100  |
| C  | -0.65414 | 4.04250  | -0.32711 |
| C  | 0.44482  | 4.53665  | 0.42537  |
| C  | 1.45079  | 5.25588  | -0.22716 |

|   |          |          |          |
|---|----------|----------|----------|
| C | 1.40123  | 5.51559  | -1.59044 |
| C | 0.31077  | 5.06146  | -2.31924 |
| C | -0.71964 | 4.33277  | -1.71886 |
| C | 0.58351  | 4.31323  | 1.92338  |
| C | 1.64129  | 3.24778  | 2.23599  |
| C | -1.90242 | 3.92438  | -2.58509 |
| C | -1.49353 | 3.04235  | -3.77362 |
| N | -3.22262 | 2.14254  | 1.40100  |
| C | -4.54274 | 1.89827  | 1.88200  |
| C | -5.69981 | 2.18600  | 1.10254  |
| C | -6.96319 | 1.85644  | 1.60396  |
| C | -7.13033 | 1.24021  | 2.83503  |
| C | -6.00288 | 0.93948  | 3.58420  |
| C | -4.71500 | 1.25028  | 3.13853  |
| C | -5.66478 | 2.81696  | -0.28234 |
| C | -6.20350 | 1.85265  | -1.35204 |
| C | -3.55921 | 0.89053  | 4.05828  |
| C | -3.50330 | -0.62135 | 4.31885  |
| C | 0.62158  | 0.95988  | -0.90487 |
| C | -2.23965 | -1.58880 | 1.02885  |
| C | -3.09766 | 0.11397  | -1.77724 |
| N | 2.24101  | -3.37538 | -0.23740 |
| C | 2.39444  | -4.52968 | 0.58176  |
| C | 3.57910  | -4.77752 | 1.32893  |
| C | 3.63674  | -5.90378 | 2.15686  |
| C | 2.56912  | -6.78115 | 2.28125  |
| C | 1.40350  | -6.51897 | 1.57547  |
| C | 1.28593  | -5.40679 | 0.73784  |
| C | 4.79932  | -3.86647 | 1.31628  |
| C | 5.00949  | -3.19895 | 2.68575  |
| C | -0.03758 | -5.20322 | 0.01801  |
| C | -1.20021 | -5.09404 | 1.01407  |
| C | -3.08391 | -3.12190 | -1.76238 |
| C | -2.66464 | 3.33436  | 1.05215  |

|   |          |          |          |
|---|----------|----------|----------|
| N | -3.11748 | 4.56277  | 1.49665  |
| C | -3.97163 | 4.71344  | 2.68148  |
| C | -3.30229 | 5.33870  | 3.89108  |
| C | -2.15520 | 4.78000  | 4.46598  |
| C | -1.59911 | 5.32393  | 5.62229  |
| C | -2.18547 | 6.43525  | 6.22732  |
| C | -3.33323 | 6.99469  | 5.66987  |
| C | -3.88371 | 6.44981  | 4.51040  |
| C | -2.53641 | 5.83084  | 1.02659  |
| C | -3.51240 | 6.97891  | 0.86454  |
| C | -3.37052 | 8.13510  | 1.63878  |
| C | -4.20459 | 9.23539  | 1.44191  |
| C | -5.19786 | 9.19417  | 0.46568  |
| C | -5.34391 | 8.05029  | -0.31861 |
| C | -4.50268 | 6.95738  | -0.12314 |
| C | 3.53567  | -5.36389 | -2.01801 |
| C | 3.17681  | -6.12633 | -3.27799 |
| C | 3.95157  | -7.22528 | -3.66264 |
| C | 3.59878  | -7.99847 | -4.76775 |
| C | 2.46597  | -7.67666 | -5.51266 |
| C | 1.68589  | -6.58280 | -5.13921 |
| C | 2.03671  | -5.81871 | -4.02796 |
| C | 0.92107  | 5.60239  | 2.68730  |
| C | -2.66468 | 5.15580  | -3.10038 |
| C | -6.47579 | 4.11934  | -0.32943 |
| C | -3.63808 | 1.64268  | 5.39557  |
| C | 6.08068  | -4.61974 | 0.93074  |
| C | -0.31379 | -6.31671 | -1.00319 |
| C | 1.05546  | -2.68702 | -5.48893 |
| C | 6.42479  | 0.09343  | -1.76658 |
| H | 1.43531  | 0.61344  | -1.56528 |
| H | -0.02960 | 1.43550  | -1.65970 |
| H | 1.05422  | 1.82468  | -0.37836 |
| H | -2.64457 | -2.35055 | 1.71036  |

|   |          |          |          |
|---|----------|----------|----------|
| H | -3.43240 | 1.15435  | -1.62375 |
| H | -2.15887 | 0.14635  | -2.35515 |
| H | -3.82314 | -0.26259 | -2.50944 |
| H | -3.52399 | -2.99870 | -2.76223 |
| H | -2.00578 | -3.26967 | -1.89732 |
| H | -3.48814 | -4.06150 | -1.36410 |
| H | -5.66665 | -0.72473 | 0.70957  |
| H | -5.60226 | -2.48362 | 0.64196  |
| H | -6.14520 | -1.57991 | -0.76256 |
| H | 3.15322  | -0.19041 | 3.08536  |
| H | 2.61918  | 0.51588  | 1.61767  |
| H | 3.42002  | -1.07301 | 1.63732  |
| H | -0.54333 | 0.08848  | 4.87009  |
| H | 0.99293  | 0.92945  | 4.69966  |
| H | -0.22506 | 1.06380  | 3.43709  |
| H | 2.00120  | -3.58020 | 3.87390  |
| H | 0.85114  | -3.04176 | 5.09333  |
| H | 2.49481  | -2.41180 | 5.10752  |
| H | -2.05949 | 5.65280  | 0.06614  |
| H | -1.74958 | 6.14748  | 1.72034  |
| H | -2.60003 | 8.17280  | 2.40418  |
| H | -4.07648 | 10.12479 | 2.05297  |
| H | -5.84947 | 10.04978 | 0.31130  |
| H | -6.10770 | 8.01195  | -1.09057 |
| H | -4.61104 | 6.07673  | -0.74665 |
| H | -4.36085 | 3.73630  | 2.95810  |
| H | -4.83602 | 5.32629  | 2.40355  |
| H | -1.70529 | 3.89880  | 4.01746  |
| H | -0.71395 | 4.86957  | 6.05919  |
| H | -1.75361 | 6.85704  | 7.13067  |
| H | -3.80178 | 7.85746  | 6.13575  |
| H | -4.77551 | 6.89424  | 4.07563  |
| H | 2.29562  | 5.62123  | 0.35061  |
| H | 2.19695  | 6.07418  | -2.07528 |



|   |          |          |          |
|---|----------|----------|----------|
| H | 0.25278  | 5.27825  | -3.38298 |
| H | -0.37787 | 3.94458  | 2.29372  |
| H | 0.23715  | 6.42029  | 2.44413  |
| H | 1.93709  | 5.94559  | 2.46485  |
| H | 0.86510  | 5.42925  | 3.76618  |
| H | 1.73697  | 3.09509  | 3.31592  |
| H | 2.62076  | 3.54597  | 1.84511  |
| H | 1.37882  | 2.28694  | 1.78832  |
| H | -2.58618 | 3.34880  | -1.95208 |
| H | -2.96117 | 5.82446  | -2.28780 |
| H | -3.56881 | 4.85234  | -3.64046 |
| H | -2.04750 | 5.73966  | -3.79237 |
| H | -0.94889 | 2.14876  | -3.45642 |
| H | -0.84470 | 3.58788  | -4.46759 |
| H | -2.37836 | 2.71934  | -4.33330 |
| H | -7.83950 | 2.07651  | 1.00000  |
| H | -8.12277 | 0.99076  | 3.19979  |
| H | -6.11933 | 0.45194  | 4.54839  |
| H | -4.62415 | 3.05422  | -0.52946 |
| H | -6.14478 | 4.83609  | 0.42496  |
| H | -7.53941 | 3.92432  | -0.15618 |
| H | -6.39201 | 4.59157  | -1.31515 |
| H | -6.06276 | 2.27166  | -2.35548 |
| H | -7.27673 | 1.68160  | -1.21451 |
| H | -5.71385 | 0.87887  | -1.30625 |
| H | -2.63199 | 1.18722  | 3.55839  |
| H | -3.68966 | 2.72558  | 5.25820  |
| H | -2.75625 | 1.42322  | 6.00783  |
| H | -4.52081 | 1.33801  | 5.96924  |
| H | -3.44471 | -1.18344 | 3.38505  |
| H | -4.39237 | -0.96210 | 4.86120  |
| H | -2.63011 | -0.87694 | 4.92782  |
| H | 2.79802  | -5.59454 | -1.25293 |
| H | 4.49776  | -5.73648 | -1.64789 |

|   |          |          |          |
|---|----------|----------|----------|
| H | 4.84316  | -7.47383 | -3.09219 |
| H | 4.21321  | -8.84960 | -5.04860 |
| H | 2.19033  | -8.27498 | -6.37660 |
| H | 0.79677  | -6.32801 | -5.70935 |
| H | 1.41570  | -4.97709 | -3.73608 |
| H | 4.53761  | -2.38244 | -3.25427 |
| H | 3.97249  | -3.72404 | -4.22988 |
| H | 5.60009  | -5.07779 | -5.15729 |
| H | 7.93434  | -5.89021 | -5.26995 |
| H | 9.53936  | -5.32346 | -3.45776 |
| H | 8.78980  | -3.92375 | -1.54545 |
| H | 6.45780  | -3.10152 | -1.45145 |
| H | 4.54257  | -6.08986 | 2.72790  |
| H | 2.64107  | -7.65038 | 2.92899  |
| H | 0.55602  | -7.19168 | 1.67575  |
| H | 4.63181  | -3.07610 | 0.57520  |
| H | 5.99584  | -5.11485 | -0.03881 |
| H | 6.32535  | -5.38444 | 1.67525  |
| H | 6.93185  | -3.93108 | 0.88540  |
| H | 5.82452  | -2.46698 | 2.63748  |
| H | 5.28022  | -3.94478 | 3.44116  |
| H | 4.10867  | -2.69506 | 3.03984  |
| H | 0.02518  | -4.25783 | -0.53216 |
| H | 0.48564  | -6.40647 | -1.74467 |
| H | -1.24955 | -6.11776 | -1.53690 |
| H | -0.41442 | -7.28936 | -0.50837 |
| H | -1.01171 | -4.30778 | 1.74876  |
| H | -1.35206 | -6.03708 | 1.55119  |
| H | -2.12981 | -4.86201 | 0.48572  |
| H | 1.95266  | -0.22791 | -5.93220 |
| H | 3.71173  | 1.49501  | -5.75965 |
| H | 5.05100  | 1.67294  | -3.68908 |
| H | 1.31294  | -2.83216 | -3.37221 |
| H | 2.00281  | -3.14674 | -5.78532 |

|   |          |          |          |
|---|----------|----------|----------|
| H | 0.77527  | -1.96400 | -6.26222 |
| H | 0.28496  | -3.46515 | -5.49001 |
| H | -0.17912 | -0.95872 | -2.74034 |
| H | -1.02241 | -2.09072 | -3.81020 |
| H | -0.41002 | -0.54798 | -4.44182 |
| H | 4.66763  | -0.61225 | -0.76535 |
| H | 6.65992  | -0.83713 | -2.29077 |
| H | 7.01608  | 0.12412  | -0.84421 |
| H | 6.76376  | 0.92220  | -2.39776 |
| H | 3.58881  | 1.64488  | -0.46832 |
| H | 4.92157  | 2.38785  | -1.34546 |
| H | 5.22953  | 1.59651  | 0.20794  |
| C | -0.92275 | -1.30190 | 1.15313  |
| O | -0.02805 | -1.97092 | 1.97099  |

216

TS3 without dispersion

|   |         |          |          |
|---|---------|----------|----------|
| C | 0.99756 | -5.48709 | 0.54415  |
| C | 2.12898 | -4.62332 | 0.52863  |
| C | 3.22082 | -4.90858 | 1.39473  |
| C | 3.18005 | -6.05837 | 2.18957  |
| C | 2.09678 | -6.92482 | 2.17213  |
| C | 1.01470 | -6.62391 | 1.35769  |
| N | 2.08134 | -3.44131 | -0.26595 |
| C | 2.79943 | -3.09380 | -1.36763 |
| N | 3.58319 | -3.96064 | -2.10037 |
| C | 3.51971 | -5.42065 | -1.95918 |
| C | 3.25511 | -6.17534 | -3.24652 |
| C | 2.16913 | -5.86022 | -4.06929 |
| C | 1.89230 | -6.61678 | -5.20615 |
| C | 2.69547 | -7.70844 | -5.53398 |
| C | 3.77816 | -8.03422 | -4.71920 |
| C | 4.05673 | -7.26929 | -3.58735 |
| C | 4.43304 | -4.00332 | 1.55264  |
| C | 5.75510 | -4.74436 | 1.30751  |

|    |          |          |          |
|----|----------|----------|----------|
| C  | -0.24437 | -5.24730 | -0.29958 |
| C  | -0.41141 | -6.31856 | -1.38743 |
| Y  | 1.12226  | -1.32520 | 0.12880  |
| C  | -1.17576 | -1.62308 | 0.62560  |
| C  | -2.49029 | -1.65027 | 0.74128  |
| Al | -3.55200 | -1.71862 | -1.00309 |
| C  | -3.12188 | 0.25935  | -1.69873 |
| Y  | -1.62345 | 0.88107  | 0.29726  |
| C  | 0.53538  | 0.83034  | -1.09480 |
| N  | -3.10187 | 2.22400  | 1.53762  |
| C  | -4.35068 | 1.87728  | 2.12572  |
| C  | -5.58874 | 2.06038  | 1.44568  |
| C  | -6.76444 | 1.58150  | 2.03192  |
| C  | -6.76472 | 0.92194  | 3.25252  |
| C  | -5.55827 | 0.74143  | 3.91268  |
| C  | -4.35053 | 1.20338  | 3.38108  |
| C  | -5.72924 | 2.75108  | 0.09620  |
| C  | -6.62967 | 3.99186  | 0.19487  |
| C  | -3.09579 | 1.00641  | 4.22046  |
| C  | -3.16166 | 1.83316  | 5.51479  |
| C  | -2.61784 | 3.43165  | 1.13924  |
| N  | -1.62107 | 3.26433  | 0.23394  |
| C  | -0.74158 | 4.20392  | -0.37286 |
| C  | 0.40563  | 4.69831  | 0.29975  |
| C  | 1.29344  | 5.53133  | -0.38776 |
| C  | 1.08857  | 5.88192  | -1.71562 |
| C  | -0.02543 | 5.38421  | -2.37755 |
| C  | -0.94577 | 4.54920  | -1.73746 |
| C  | 0.74855  | 4.30813  | 1.72794  |
| C  | 1.09506  | 5.50753  | 2.61930  |
| C  | -2.14090 | 4.05397  | -2.53729 |
| C  | -3.00604 | 5.21221  | -3.05627 |
| N  | -3.07437 | 4.64197  | 1.61499  |
| C  | -2.59742 | 5.93496  | 1.09654  |

|    |          |          |          |
|----|----------|----------|----------|
| C  | -3.65917 | 7.00915  | 0.98279  |
| C  | -3.55089 | 8.18825  | 1.72659  |
| C  | -4.47663 | 9.21953  | 1.56965  |
| C  | -5.52880 | 9.08328  | 0.66662  |
| C  | -5.64562 | 7.91275  | -0.08282 |
| C  | -4.71415 | 6.88884  | 0.07200  |
| C  | -3.88349 | 4.75842  | 2.83332  |
| C  | -3.20928 | 5.47261  | 3.98904  |
| C  | -3.89704 | 6.47898  | 4.67516  |
| C  | -3.33566 | 7.09535  | 5.79237  |
| C  | -2.06958 | 6.71789  | 6.23583  |
| C  | -1.37374 | 5.71725  | 5.55844  |
| C  | -1.94172 | 5.09832  | 4.44652  |
| C  | -6.29814 | 1.80548  | -0.97371 |
| C  | -2.85317 | -0.46837 | 4.57047  |
| C  | 1.90913  | 3.30385  | 1.73265  |
| C  | -1.70530 | 3.16213  | -3.70964 |
| N  | 2.63556  | -1.77437 | -1.64561 |
| C  | 3.02620  | -0.98298 | -2.75895 |
| C  | 4.05225  | -0.01281 | -2.57645 |
| C  | 4.34297  | 0.88417  | -3.60726 |
| C  | 3.65164  | 0.85779  | -4.81096 |
| C  | 2.65551  | -0.09177 | -4.99005 |
| C  | 2.32460  | -1.01680 | -3.99379 |
| C  | 4.87657  | 0.07562  | -1.30030 |
| C  | 6.36805  | -0.18215 | -1.56571 |
| C  | 1.20547  | -2.00335 | -4.29655 |
| C  | 1.47478  | -2.79793 | -5.58376 |
| O  | -0.43789 | -0.41357 | 1.67673  |
| Al | 0.72796  | -0.64236 | 3.10261  |
| C  | 0.70513  | 0.89860  | 4.34393  |
| C  | 0.55262  | -2.47955 | 3.80988  |
| C  | 2.56905  | -0.51556 | 2.05630  |
| C  | 4.70992  | 1.43149  | -0.59922 |

|   |          |          |          |
|---|----------|----------|----------|
| C | -0.15406 | -1.29918 | -4.42067 |
| C | 4.51817  | -3.51230 | -3.14105 |
| C | 5.91399  | -4.09265 | -3.03433 |
| C | 6.45966  | -4.80278 | -4.10813 |
| C | 7.77040  | -5.27612 | -4.05955 |
| C | 8.55284  | -5.05191 | -2.92859 |
| C | 8.01780  | -4.34791 | -1.85001 |
| C | 6.71048  | -3.86959 | -1.90659 |
| C | 4.46092  | -3.37739 | 2.95779  |
| C | -1.50737 | -5.18492 | 0.57123  |
| C | -5.48589 | -1.88134 | -0.60386 |
| C | -2.83079 | -2.92585 | -2.40042 |
| H | 1.58711  | 1.05831  | -0.83486 |
| H | 0.59868  | 0.42314  | -2.11409 |
| H | 0.15586  | 1.85506  | -1.26100 |
| H | -3.01512 | -1.19623 | 1.59297  |
| H | -3.51448 | 1.22744  | -1.34173 |
| H | -2.14738 | 0.44025  | -2.18867 |
| H | -3.77883 | 0.06147  | -2.55683 |
| H | -3.16669 | -2.64034 | -3.40651 |
| H | -1.73541 | -2.96795 | -2.42573 |
| H | -3.18562 | -3.95185 | -2.23572 |
| H | -5.82775 | -1.23172 | 0.21147  |
| H | -5.70793 | -2.91302 | -0.29663 |
| H | -6.12457 | -1.67431 | -1.47322 |
| H | 3.08825  | -0.38500 | 3.01507  |
| H | 2.77833  | 0.42248  | 1.51883  |
| H | 3.17507  | -1.30668 | 1.58239  |
| H | 0.09575  | 0.69290  | 5.23239  |
| H | 1.71441  | 1.13553  | 4.70736  |
| H | 0.30821  | 1.81544  | 3.89155  |
| H | 0.71471  | -3.27188 | 3.06652  |
| H | -0.44757 | -2.64910 | 4.22889  |
| H | 1.26976  | -2.66645 | 4.62118  |

|   |          |          |          |
|---|----------|----------|----------|
| H | -2.16923 | 5.77245  | 0.11099  |
| H | -1.79032 | 6.30899  | 1.73718  |
| H | -2.73572 | 8.29718  | 2.43715  |
| H | -4.37430 | 10.12922 | 2.15509  |
| H | -6.25135 | 9.88528  | 0.54331  |
| H | -6.45849 | 7.80008  | -0.79506 |
| H | -4.80384 | 5.98431  | -0.52073 |
| H | -4.17735 | 3.76089  | 3.15425  |
| H | -4.80783 | 5.29164  | 2.58599  |
| H | -1.39986 | 4.30825  | 3.93469  |
| H | -0.38943 | 5.41068  | 5.90115  |
| H | -1.62809 | 7.19821  | 7.10460  |
| H | -3.88680 | 7.87396  | 6.31283  |
| H | -4.88038 | 6.78488  | 4.32639  |
| H | 2.17265  | 5.90572  | 0.12965  |
| H | 1.79264  | 6.53017  | -2.22971 |
| H | -0.18947 | 5.64827  | -3.41916 |
| H | -0.12577 | 3.80776  | 2.15810  |
| H | 0.29188  | 6.24879  | 2.64494  |
| H | 2.00529  | 6.01216  | 2.27895  |
| H | 1.27682  | 5.17405  | 3.64622  |
| H | 2.14441  | 2.97732  | 2.75020  |
| H | 2.80977  | 3.75260  | 1.29947  |
| H | 1.66182  | 2.42004  | 1.13865  |
| H | -2.75725 | 3.44992  | -1.86339 |
| H | -3.31189 | 5.88787  | -2.25273 |
| H | -3.90970 | 4.82725  | -3.54216 |
| H | -2.46623 | 5.81142  | -3.79785 |
| H | -1.08153 | 2.32826  | -3.37612 |
| H | -1.12324 | 3.73262  | -4.44215 |
| H | -2.57899 | 2.75019  | -4.22651 |
| H | -7.70570 | 1.72117  | 1.50702  |
| H | -7.69219 | 0.55380  | 3.68188  |
| H | -5.54878 | 0.23457  | 4.87383  |

|   |          |          |          |
|---|----------|----------|----------|
| H | -4.73613 | 3.07649  | -0.23325 |
| H | -6.26549 | 4.71086  | 0.93192  |
| H | -7.64899 | 3.71156  | 0.48091  |
| H | -6.69438 | 4.49843  | -0.77477 |
| H | -6.28293 | 2.28841  | -1.95773 |
| H | -7.33914 | 1.54611  | -0.75273 |
| H | -5.73871 | 0.87110  | -1.03596 |
| H | -2.24023 | 1.36237  | 3.63678  |
| H | -3.32217 | 2.89612  | 5.31844  |
| H | -2.22723 | 1.73424  | 6.07756  |
| H | -3.97683 | 1.48696  | 6.16017  |
| H | -2.74584 | -1.09349 | 3.68046  |
| H | -3.67498 | -0.87934 | 5.16667  |
| H | -1.93853 | -0.57224 | 5.16213  |
| H | 2.73620  | -5.66811 | -1.24685 |
| H | 4.46136  | -5.78107 | -1.52934 |
| H | 4.90904  | -7.52077 | -2.96075 |
| H | 4.41142  | -8.88210 | -4.96610 |
| H | 2.47786  | -8.30124 | -6.41809 |
| H | 1.04377  | -6.35685 | -5.83300 |
| H | 1.53445  | -5.01654 | -3.81473 |
| H | 4.58728  | -2.42798 | -3.10218 |
| H | 4.11183  | -3.76889 | -4.12583 |
| H | 5.84921  | -4.98999 | -4.98784 |
| H | 8.17742  | -5.82409 | -4.90502 |
| H | 9.57368  | -5.42157 | -2.88720 |
| H | 8.62103  | -4.16610 | -0.96468 |
| H | 6.30084  | -3.31568 | -1.06740 |
| H | 4.01762  | -6.27182 | 2.84845  |
| H | 2.09005  | -7.81432 | 2.79596  |
| H | 0.15342  | -7.28649 | 1.35095  |
| H | 4.35403  | -3.19585 | 0.81504  |
| H | 5.78568  | -5.22317 | 0.32631  |
| H | 5.91730  | -5.52167 | 2.06157  |



|   |          |          |          |
|---|----------|----------|----------|
| H | 6.60108  | -4.05052 | 1.37392  |
| H | 5.25908  | -2.62984 | 3.03578  |
| H | 4.65120  | -4.14558 | 3.71545  |
| H | 3.51129  | -2.90117 | 3.21054  |
| H | -0.12929 | -4.27798 | -0.79536 |
| H | 0.46448  | -6.38900 | -2.03808 |
| H | -1.28090 | -6.09110 | -2.01357 |
| H | -0.57140 | -7.30756 | -0.94294 |
| H | -1.40480 | -4.45356 | 1.37586  |
| H | -1.72757 | -6.15919 | 1.02229  |
| H | -2.37096 | -4.89634 | -0.03494 |
| H | 2.10957  | -0.11407 | -5.92964 |
| H | 3.88682  | 1.56687  | -5.59974 |
| H | 5.12986  | 1.61978  | -3.46078 |
| H | 1.14222  | -2.71157 | -3.46246 |
| H | 2.43618  | -3.31714 | -5.55846 |
| H | 1.47519  | -2.14229 | -6.46090 |
| H | 0.68980  | -3.54541 | -5.74113 |
| H | -0.44017 | -0.79670 | -3.49374 |
| H | -0.94117 | -2.02057 | -4.65968 |
| H | -0.13072 | -0.54615 | -5.21611 |
| H | 4.51377  | -0.70502 | -0.62248 |
| H | 6.53835  | -1.13552 | -2.07238 |
| H | 6.92802  | -0.19326 | -0.62343 |
| H | 6.79945  | 0.60528  | -2.19360 |
| H | 3.65996  | 1.66916  | -0.40790 |
| H | 5.11741  | 2.24451  | -1.21038 |
| H | 5.24222  | 1.43859  | 0.35851  |

216

Int4 without dispersion

|   |         |          |         |
|---|---------|----------|---------|
| C | 0.83340 | -5.56030 | 0.47344 |
| C | 1.96534 | -4.69601 | 0.51228 |
| C | 3.03823 | -5.01708 | 1.38979 |
| C | 2.97489 | -6.19310 | 2.14441 |

|    |          |          |          |
|----|----------|----------|----------|
| C  | 1.89358  | -7.05823 | 2.07141  |
| C  | 0.83172  | -6.72785 | 1.24180  |
| N  | 1.92919  | -3.49244 | -0.24953 |
| C  | 2.67353  | -3.12929 | -1.32678 |
| N  | 3.49007  | -3.98273 | -2.04680 |
| C  | 3.47269  | -5.44108 | -1.87654 |
| C  | 3.43885  | -6.24897 | -3.15746 |
| C  | 2.48781  | -6.01318 | -4.15423 |
| C  | 2.42216  | -6.82414 | -5.28567 |
| C  | 3.30256  | -7.89558 | -5.43107 |
| C  | 4.25030  | -8.14506 | -4.43992 |
| C  | 4.31977  | -7.32353 | -3.31628 |
| C  | 4.25659  | -4.13073 | 1.60538  |
| C  | 5.58090  | -4.88551 | 1.41860  |
| C  | -0.38237 | -5.29000 | -0.40018 |
| C  | -0.40134 | -6.18935 | -1.64496 |
| Y  | 0.99785  | -1.32061 | 0.17524  |
| C  | -1.57663 | -1.80275 | 0.25406  |
| C  | -2.49610 | -2.22672 | 0.96934  |
| Al | -3.44313 | -1.68144 | -1.15898 |
| C  | -3.12213 | 0.24638  | -1.70737 |
| Y  | -1.49408 | 0.86490  | 0.43166  |
| C  | 0.43100  | 0.69443  | -1.25928 |
| N  | -3.09308 | 2.19988  | 1.57463  |
| C  | -4.32095 | 1.85991  | 2.19903  |
| C  | -5.57817 | 2.00982  | 1.54779  |
| C  | -6.72924 | 1.51616  | 2.17014  |
| C  | -6.68581 | 0.87314  | 3.39944  |
| C  | -5.46054 | 0.73188  | 4.03610  |
| C  | -4.27875 | 1.21635  | 3.46878  |
| C  | -5.75673 | 2.68306  | 0.19460  |
| C  | -6.66634 | 3.91658  | 0.30075  |
| C  | -2.99137 | 1.05709  | 4.26307  |
| C  | -3.08075 | 1.73711  | 5.63770  |

|   |          |          |          |
|---|----------|----------|----------|
| C | -2.59963 | 3.40031  | 1.17411  |
| N | -1.59488 | 3.22666  | 0.28060  |
| C | -0.69437 | 4.15097  | -0.31784 |
| C | 0.44787  | 4.63493  | 0.37086  |
| C | 1.36484  | 5.43840  | -0.31370 |
| C | 1.18921  | 5.77472  | -1.64964 |
| C | 0.07449  | 5.29456  | -2.32350 |
| C | -0.87153 | 4.48450  | -1.68903 |
| C | 0.74310  | 4.27756  | 1.81823  |
| C | 1.09891  | 5.49892  | 2.67637  |
| C | -2.06796 | 4.00774  | -2.49829 |
| C | -2.93463 | 5.18194  | -2.97862 |
| N | -3.05541 | 4.61792  | 1.63827  |
| C | -2.56566 | 5.90269  | 1.11707  |
| C | -3.62713 | 6.97296  | 0.96879  |
| C | -3.49916 | 8.18817  | 1.64832  |
| C | -4.42496 | 9.21403  | 1.45881  |
| C | -5.49790 | 9.03526  | 0.58823  |
| C | -5.63559 | 7.82724  | -0.09548 |
| C | -4.70403 | 6.80866  | 0.09108  |
| C | -3.85612 | 4.75162  | 2.86079  |
| C | -3.16012 | 5.44554  | 4.01649  |
| C | -3.78634 | 6.51773  | 4.66028  |
| C | -3.20609 | 7.12087  | 5.77540  |
| C | -1.98329 | 6.66148  | 6.26035  |
| C | -1.34873 | 5.59404  | 5.62581  |
| C | -1.93440 | 4.99094  | 4.51454  |
| C | -6.33853 | 1.72052  | -0.85293 |
| C | -2.61136 | -0.41919 | 4.43373  |
| C | 1.86958  | 3.23842  | 1.89662  |
| C | -1.64062 | 3.15255  | -3.70039 |
| N | 2.51457  | -1.80811 | -1.60430 |
| C | 2.87749  | -1.05248 | -2.75469 |
| C | 3.86432  | -0.03403 | -2.61873 |

|    |          |          |          |
|----|----------|----------|----------|
| C  | 4.12373  | 0.82467  | -3.68981 |
| C  | 3.44328  | 0.71410  | -4.89389 |
| C  | 2.49314  | -0.28718 | -5.03165 |
| C  | 2.19421  | -1.17788 | -3.99441 |
| C  | 4.69361  | 0.14679  | -1.35597 |
| C  | 6.18636  | -0.11054 | -1.61688 |
| C  | 1.12133  | -2.22277 | -4.27064 |
| C  | 1.40782  | -3.00962 | -5.55992 |
| O  | -0.00438 | 0.13433  | 1.66162  |
| Al | 1.03794  | -0.50956 | 2.98861  |
| C  | 1.24400  | 0.58470  | 4.62058  |
| C  | 0.47795  | -2.42587 | 3.21610  |
| C  | 2.83030  | -0.56986 | 1.88657  |
| C  | 4.51738  | 1.54402  | -0.74321 |
| C  | -0.27201 | -1.58600 | -4.38039 |
| C  | 4.48452  | -3.50296 | -3.01663 |
| C  | 5.88584  | -4.04932 | -2.83241 |
| C  | 6.51157  | -4.73607 | -3.87760 |
| C  | 7.83141  | -5.16916 | -3.75969 |
| C  | 8.54385  | -4.92698 | -2.58685 |
| C  | 7.92995  | -4.24433 | -1.53717 |
| C  | 6.61336  | -3.80588 | -1.66292 |
| C  | 4.23129  | -3.51339 | 3.01308  |
| C  | -1.69573 | -5.45889 | 0.37577  |
| C  | -5.19648 | -1.92537 | -0.25543 |
| C  | -3.03428 | -3.01868 | -2.54966 |
| H  | 1.52406  | 0.82809  | -1.15520 |
| H  | 0.30658  | 0.37521  | -2.30068 |
| H  | 0.11220  | 1.75531  | -1.26472 |
| H  | -3.23881 | -2.63081 | 1.62730  |
| H  | -3.51481 | 1.09175  | -1.11996 |
| H  | -2.13033 | 0.50294  | -2.10904 |
| H  | -3.76297 | 0.27044  | -2.60112 |
| H  | -3.36282 | -2.68124 | -3.54169 |

|   |          |          |          |
|---|----------|----------|----------|
| H | -1.97184 | -3.26879 | -2.63154 |
| H | -3.57370 | -3.95151 | -2.34028 |
| H | -5.39445 | -1.25045 | 0.58588  |
| H | -5.32954 | -2.95429 | 0.10446  |
| H | -5.99745 | -1.75614 | -0.98933 |
| H | 3.45632  | -0.54848 | 2.78904  |
| H | 3.06060  | 0.37077  | 1.36693  |
| H | 3.29057  | -1.38725 | 1.30821  |
| H | 1.22803  | -0.03430 | 5.52703  |
| H | 2.18529  | 1.14817  | 4.63889  |
| H | 0.43302  | 1.31721  | 4.72056  |
| H | 0.50668  | -3.11896 | 2.35991  |
| H | -0.55350 | -2.46630 | 3.58948  |
| H | 1.10893  | -2.90560 | 3.97685  |
| H | -2.11481 | 5.73037  | 0.14289  |
| H | -1.77300 | 6.28453  | 1.77138  |
| H | -2.66839 | 8.32942  | 2.33487  |
| H | -4.30708 | 10.15223 | 1.99425  |
| H | -6.22106 | 9.83247  | 0.43993  |
| H | -6.46587 | 7.68063  | -0.78103 |
| H | -4.81081 | 5.87345  | -0.44910 |
| H | -4.17621 | 3.76235  | 3.18088  |
| H | -4.76583 | 5.31119  | 2.61710  |
| H | -1.43919 | 4.15198  | 4.03395  |
| H | -0.39885 | 5.22401  | 6.00163  |
| H | -1.52768 | 7.12984  | 7.12839  |
| H | -3.70924 | 7.95183  | 6.26251  |
| H | -4.73703 | 6.88446  | 4.28114  |
| H | 2.24223  | 5.80298  | 0.21361  |
| H | 1.91588  | 6.40044  | -2.16040 |
| H | -0.06801 | 5.55093  | -3.37025 |
| H | -0.15803 | 3.82043  | 2.23979  |
| H | 0.32534  | 6.27103  | 2.63918  |
| H | 2.04161  | 5.95475  | 2.35585  |

|   |          |          |          |
|---|----------|----------|----------|
| H | 1.22486  | 5.20177  | 3.72237  |
| H | 2.07215  | 2.96469  | 2.93696  |
| H | 2.79338  | 3.63632  | 1.46215  |
| H | 1.60255  | 2.32594  | 1.35849  |
| H | -2.67899 | 3.38291  | -1.83862 |
| H | -3.24716 | 5.82824  | -2.15377 |
| H | -3.83525 | 4.81347  | -3.48311 |
| H | -2.39064 | 5.80797  | -3.69468 |
| H | -1.00682 | 2.31462  | -3.39826 |
| H | -1.07381 | 3.74663  | -4.42606 |
| H | -2.51943 | 2.75114  | -4.21737 |
| H | -7.68647 | 1.63119  | 1.66821  |
| H | -7.59497 | 0.49184  | 3.85587  |
| H | -5.41608 | 0.24109  | 5.00499  |
| H | -4.77326 | 3.01283  | -0.15834 |
| H | -6.29119 | 4.64488  | 1.02311  |
| H | -7.67659 | 3.63065  | 0.61267  |
| H | -6.75636 | 4.41415  | -0.67158 |
| H | -6.35754 | 2.19541  | -1.84066 |
| H | -7.36844 | 1.44416  | -0.60216 |
| H | -5.76206 | 0.79681  | -0.92433 |
| H | -2.19074 | 1.54538  | 3.69692  |
| H | -3.34857 | 2.79369  | 5.55345  |
| H | -2.11726 | 1.67329  | 6.15503  |
| H | -3.82823 | 1.25240  | 6.27559  |
| H | -2.47731 | -0.91346 | 3.46739  |
| H | -3.38495 | -0.96558 | 4.98551  |
| H | -1.67394 | -0.51441 | 4.99080  |
| H | 2.59937  | -5.70717 | -1.28599 |
| H | 4.34722  | -5.75295 | -1.29440 |
| H | 5.07123  | -7.51362 | -2.55397 |
| H | 4.94248  | -8.97631 | -4.54371 |
| H | 3.24965  | -8.53120 | -6.31068 |
| H | 1.67840  | -6.62138 | -6.05155 |

|   |          |          |          |
|---|----------|----------|----------|
| H | 1.79643  | -5.18458 | -4.04161 |
| H | 4.52854  | -2.41882 | -2.95503 |
| H | 4.14726  | -3.74511 | -4.03071 |
| H | 5.95620  | -4.93704 | -4.79013 |
| H | 8.30049  | -5.69975 | -4.58382 |
| H | 9.57205  | -5.26496 | -2.49118 |
| H | 8.47918  | -4.04694 | -0.62058 |
| H | 6.14422  | -3.26409 | -0.84691 |
| H | 3.79675  | -6.43105 | 2.81438  |
| H | 1.87281  | -7.96988 | 2.66210  |
| H | -0.02578 | -7.39274 | 1.18735  |
| H | 4.22267  | -3.31683 | 0.87212  |
| H | 5.65771  | -5.36023 | 0.43791  |
| H | 5.70409  | -5.66575 | 2.17693  |
| H | 6.42743  | -4.19814 | 1.52700  |
| H | 5.06568  | -2.81515 | 3.14601  |
| H | 4.32540  | -4.29510 | 3.77505  |
| H | 3.29923  | -2.97878 | 3.20206  |
| H | -0.32352 | -4.25002 | -0.73825 |
| H | 0.49476  | -6.06541 | -2.25787 |
| H | -1.27196 | -5.96167 | -2.26978 |
| H | -0.45903 | -7.24592 | -1.35914 |
| H | -1.67421 | -4.91016 | 1.32133  |
| H | -1.89845 | -6.51093 | 0.60499  |
| H | -2.53521 | -5.09074 | -0.22229 |
| H | 1.95705  | -0.37878 | -5.97253 |
| H | 3.65254  | 1.39501  | -5.71417 |
| H | 4.87930  | 1.59747  | -3.57415 |
| H | 1.10422  | -2.92901 | -3.43311 |
| H | 2.41199  | -3.44170 | -5.56980 |
| H | 1.31522  | -2.37003 | -6.44386 |
| H | 0.68278  | -3.82257 | -5.67886 |
| H | -0.58702 | -1.12974 | -3.43937 |
| H | -1.01957 | -2.33765 | -4.65134 |

|   |          |          |          |
|---|----------|----------|----------|
| H | -0.28131 | -0.80827 | -5.15211 |
| H | 4.34737  | -0.59202 | -0.62669 |
| H | 6.36725  | -1.09844 | -2.04869 |
| H | 6.75446  | -0.04165 | -0.68188 |
| H | 6.60048  | 0.63151  | -2.30857 |
| H | 3.46732  | 1.78245  | -0.55253 |
| H | 4.90865  | 2.32063  | -1.40988 |
| H | 5.06240  | 1.61795  | 0.20435  |

216

Int5 without dispersion

|   |          |          |          |
|---|----------|----------|----------|
| C | -2.08264 | 1.15990  | -7.82846 |
| C | -3.21740 | 0.95119  | -7.03508 |
| C | -4.47119 | 0.95058  | -7.65417 |
| C | -4.59156 | 1.15100  | -9.02888 |
| C | -3.45554 | 1.36519  | -9.80601 |
| C | -2.19909 | 1.37082  | -9.20018 |
| C | -3.11263 | 0.65214  | -5.55358 |
| N | -2.51008 | 1.73036  | -4.74707 |
| C | -2.98075 | 3.06669  | -5.12599 |
| C | -4.47706 | 3.28466  | -5.00108 |
| C | -5.14263 | 4.03806  | -5.97422 |
| C | -6.49925 | 4.33094  | -5.84823 |
| C | -7.21656 | 3.86200  | -4.74886 |
| C | -6.56601 | 3.10103  | -3.77861 |
| C | -5.20679 | 2.81728  | -3.90410 |
| C | -1.96260 | 1.49059  | -3.49842 |
| N | -1.94437 | 0.29267  | -2.85921 |
| C | -2.32645 | -1.00636 | -3.29912 |
| C | -1.36761 | -1.84281 | -3.94108 |
| C | -1.71989 | -3.14758 | -4.29769 |
| C | -2.97703 | -3.66645 | -4.02045 |
| C | -3.89800 | -2.86473 | -3.36203 |
| C | -3.60180 | -1.54896 | -2.99035 |
| C | 0.03867  | -1.37410 | -4.28524 |



|    |          |          |          |
|----|----------|----------|----------|
| C  | 0.26558  | -1.29563 | -5.80208 |
| C  | -4.67363 | -0.77606 | -2.23955 |
| C  | -5.99064 | -0.66820 | -3.02127 |
| N  | -1.41602 | 2.47013  | -2.72749 |
| Y  | -1.19262 | 1.19178  | -0.74939 |
| C  | 1.66784  | 1.42014  | -0.66977 |
| C  | 1.55569  | 0.36008  | -1.29061 |
| C  | -0.86004 | 3.72636  | -3.10739 |
| C  | -1.44698 | 4.92697  | -2.61773 |
| C  | -0.79767 | 6.14693  | -2.82589 |
| C  | 0.39535  | 6.22571  | -3.53013 |
| C  | 0.94333  | 5.06079  | -4.04844 |
| C  | 0.34885  | 3.81027  | -3.85180 |
| C  | -2.78334 | 4.94482  | -1.89439 |
| C  | -2.61250 | 5.24911  | -0.40205 |
| C  | 1.02210  | 2.60781  | -4.49228 |
| C  | 0.89987  | 2.68400  | -6.02160 |
| C  | 2.49931  | 2.46637  | -4.09921 |
| C  | -3.77759 | 5.93260  | -2.52255 |
| C  | -3.44546 | 1.83067  | 0.24956  |
| Al | -2.31136 | 1.88985  | 2.05393  |
| C  | -2.42184 | 3.68742  | 2.87756  |
| Y  | 0.89942  | 0.03784  | 1.60138  |
| C  | -0.70831 | -1.17460 | -0.05204 |
| Al | 2.40490  | 2.95236  | 0.48264  |
| C  | 1.13506  | 4.44216  | 0.71402  |
| O  | -0.66928 | 1.44582  | 1.39072  |
| C  | -3.13833 | 0.43856  | 3.11854  |
| C  | 2.66930  | 1.92405  | 2.25952  |
| N  | 1.05942  | -1.05330 | 3.67510  |
| C  | 1.99795  | -1.98021 | 3.31007  |
| N  | 2.69454  | -2.72716 | 4.24174  |
| C  | 2.90547  | -2.24073 | 5.61523  |
| C  | 4.29368  | -1.68657 | 5.87453  |

|   |          |          |          |
|---|----------|----------|----------|
| C | 5.15449  | -2.32764 | 6.77079  |
| C | 6.41309  | -1.79827 | 7.05680  |
| C | 6.82890  | -0.61685 | 6.44718  |
| C | 5.97855  | 0.03270  | 5.55152  |
| C | 4.72263  | -0.49914 | 5.26896  |
| N | 2.16809  | -2.01726 | 1.97388  |
| C | 3.01454  | -2.81240 | 1.14963  |
| C | 2.47049  | -3.96820 | 0.51716  |
| C | 3.24638  | -4.66729 | -0.41176 |
| C | 4.53179  | -4.26077 | -0.74478 |
| C | 5.06475  | -3.14386 | -0.11698 |
| C | 4.34031  | -2.41572 | 0.83285  |
| C | 1.09521  | -4.52525 | 0.85891  |
| C | 1.20804  | -5.83019 | 1.66432  |
| C | 5.02121  | -1.22295 | 1.48180  |
| C | 5.20586  | -0.07726 | 0.47835  |
| C | 4.15237  | 3.43032  | -0.32312 |
| C | 0.24032  | -1.08229 | 4.84318  |
| C | 0.24433  | 0.02741  | 5.73153  |
| C | -0.66641 | 0.06678  | 6.79215  |
| C | -1.56078 | -0.96644 | 7.02132  |
| C | -1.54222 | -2.06726 | 6.17447  |
| C | -0.66766 | -2.15233 | 5.08761  |
| C | 1.22559  | 1.18144  | 5.60622  |
| C | 2.04392  | 1.39123  | 6.88988  |
| C | -0.78383 | -3.36130 | 4.17051  |
| C | -1.81339 | -3.10321 | 3.06231  |
| C | 0.51584  | 2.48648  | 5.21926  |
| C | -1.14751 | -4.65752 | 4.90892  |
| C | 0.22236  | -4.77090 | -0.37934 |
| C | 6.37657  | -1.58415 | 2.10703  |
| C | 1.11557  | -2.27732 | -3.66462 |
| C | -4.94165 | -1.41100 | -0.86515 |
| C | 3.62846  | -3.78911 | 3.86089  |

|   |          |          |          |
|---|----------|----------|----------|
| C | 3.65404  | -4.97478 | 4.80328  |
| C | 4.87891  | -5.57165 | 5.11841  |
| C | 4.93246  | -6.71357 | 5.91622  |
| C | 3.75846  | -7.26926 | 6.42182  |
| C | 2.53259  | -6.67747 | 6.11954  |
| C | 2.48215  | -5.54202 | 5.31338  |
| H | 1.52920  | -0.53400 | -1.87872 |
| H | -3.42675 | 4.11396  | 2.74864  |
| H | -1.71081 | 4.42725  | 2.49387  |
| H | -2.25796 | 3.62001  | 3.96122  |
| H | -3.38030 | -0.46014 | 2.53702  |
| H | -4.08140 | 0.78833  | 3.56233  |
| H | -2.50774 | 0.11656  | 3.95741  |
| H | 1.63269  | 5.28858  | 1.20773  |
| H | 0.26920  | 4.17565  | 1.32838  |
| H | 0.76611  | 4.82307  | -0.24714 |
| H | 4.77938  | 2.58475  | -0.62415 |
| H | 4.74113  | 4.03603  | 0.38081  |
| H | 3.99988  | 4.05400  | -1.21337 |
| H | 2.72065  | -3.07215 | 6.30192  |
| H | 2.15796  | -1.48345 | 5.83505  |
| H | 4.83455  | -3.25017 | 7.24891  |
| H | 7.06707  | -2.31004 | 7.75774  |
| H | 7.80712  | -0.20028 | 6.67095  |
| H | 6.29030  | 0.96110  | 5.08031  |
| H | 4.05973  | 0.02122  | 4.58262  |
| H | 4.64427  | -3.38251 | 3.78618  |
| H | 3.36257  | -4.14569 | 2.86781  |
| H | 5.79933  | -5.13582 | 4.73678  |
| H | 5.89359  | -7.16427 | 6.14851  |
| H | 3.79835  | -8.15540 | 7.04911  |
| H | 1.61143  | -7.10182 | 6.50987  |
| H | 1.52704  | -5.08201 | 5.08141  |
| H | -0.66292 | 0.92695  | 7.45645  |

|   |          |          |          |
|---|----------|----------|----------|
| H | -2.26224 | -0.91960 | 7.84949  |
| H | -2.24207 | -2.87770 | 6.35295  |
| H | 1.92950  | 0.92202  | 4.80943  |
| H | 1.41075  | 1.71822  | 7.72159  |
| H | 2.80231  | 2.16597  | 6.73219  |
| H | 2.56005  | 0.47881  | 7.20204  |
| H | -0.04713 | 2.39141  | 4.28628  |
| H | 1.23631  | 3.30330  | 5.09809  |
| H | -0.19742 | 2.78621  | 5.99496  |
| H | 0.18774  | -3.52317 | 3.69448  |
| H | -2.80806 | -2.95014 | 3.49407  |
| H | -1.86635 | -3.95144 | 2.37023  |
| H | -1.56912 | -2.20887 | 2.48641  |
| H | -0.54177 | -4.80399 | 5.80852  |
| H | -1.00079 | -5.51922 | 4.24956  |
| H | -2.19911 | -4.66854 | 5.21466  |
| H | 2.83070  | -5.55421 | -0.88276 |
| H | 5.11442  | -4.81377 | -1.47639 |
| H | 6.07480  | -2.82716 | -0.36370 |
| H | 0.58877  | -3.78444 | 1.48540  |
| H | 1.71598  | -6.60614 | 1.08059  |
| H | 0.21196  | -6.20849 | 1.92046  |
| H | 1.76672  | -5.70272 | 2.59505  |
| H | 0.11412  | -3.87245 | -0.98995 |
| H | -0.78127 | -5.08929 | -0.07724 |
| H | 0.63559  | -5.56193 | -1.01460 |
| H | 4.37195  | -0.87333 | 2.29181  |
| H | 5.87833  | -0.37919 | -0.33263 |
| H | 5.64237  | 0.80212  | 0.96299  |
| H | 4.25998  | 0.22603  | 0.02188  |
| H | 6.29650  | -2.41302 | 2.81548  |
| H | 6.78489  | -0.72463 | 2.64743  |
| H | 7.10729  | -1.86943 | 1.34263  |
| H | -4.11640 | 0.42234  | -5.17822 |

|   |          |          |           |
|---|----------|----------|-----------|
| H | -2.51568 | -0.24786 | -5.42547  |
| H | -5.36271 | 0.79534  | -7.05222  |
| H | -5.57543 | 1.14453  | -9.48994  |
| H | -3.54681 | 1.52501  | -10.87681 |
| H | -1.30615 | 1.53347  | -9.79770  |
| H | -1.10027 | 1.16316  | -7.36760  |
| H | -2.68459 | 3.25034  | -6.16310  |
| H | -2.45810 | 3.80780  | -4.52466  |
| H | -4.59146 | 4.39547  | -6.84094  |
| H | -6.99730 | 4.91957  | -6.61397  |
| H | -8.27519 | 4.08521  | -4.64974  |
| H | -7.11644 | 2.72927  | -2.91867  |
| H | -4.70739 | 2.22854  | -3.13969  |
| H | -0.98727 | -3.77096 | -4.80422  |
| H | -3.23180 | -4.68316 | -4.30598  |
| H | -4.87915 | -3.26863 | -3.12550  |
| H | 0.15560  | -0.36641 | -3.87312  |
| H | 0.18812  | -2.28698 | -6.26233  |
| H | 1.26523  | -0.90547 | -6.02291  |
| H | -0.46521 | -0.65045 | -6.29428  |
| H | 0.97295  | -2.41814 | -2.58872  |
| H | 2.11578  | -1.86150 | -3.83444  |
| H | 1.10563  | -3.27649 | -4.11256  |
| H | -4.29687 | 0.23924  | -2.07893  |
| H | -5.85602 | -0.18276 | -3.99162  |
| H | -6.72108 | -0.08112 | -2.45407  |
| H | -6.43194 | -1.65460 | -3.19962  |
| H | -5.36233 | -2.41651 | -0.97552  |
| H | -5.65755 | -0.81308 | -0.29045  |
| H | -4.02524 | -1.50833 | -0.27534  |
| H | 1.86818  | 5.11749  | -4.61654  |
| H | 0.88715  | 7.18256  | -3.68109  |
| H | -1.24597 | 7.05465  | -2.43101  |
| H | 0.49926  | 1.70937  | -4.15036  |

|   |          |          |          |
|---|----------|----------|----------|
| H | -0.13952 | 2.80939  | -6.33431 |
| H | 1.29983  | 1.77896  | -6.49322 |
| H | 1.46578  | 3.53703  | -6.41259 |
| H | 3.09902  | 3.29458  | -4.49165 |
| H | 2.91534  | 1.54239  | -4.51789 |
| H | 2.63279  | 2.43909  | -3.01634 |
| H | -3.21522 | 3.94372  | -1.99605 |
| H | -1.93199 | 4.54819  | 0.08797  |
| H | -3.57417 | 5.20309  | 0.11984  |
| H | -2.19776 | 6.25251  | -0.25489 |
| H | -3.45540 | 6.97083  | -2.38771 |
| H | -4.75819 | 5.83040  | -2.04570 |
| H | -3.90879 | 5.75663  | -3.59373 |
| H | 3.41491  | 2.63443  | 2.64563  |
| H | 3.20265  | 0.96205  | 2.34877  |
| H | -0.72749 | -1.52228 | -1.09506 |
| H | -0.16763 | -1.98893 | 0.45650  |
| H | -1.74480 | -1.28857 | 0.31561  |
| H | 1.87641  | 1.97530  | 3.01876  |
| H | -4.25615 | 2.30066  | 0.82371  |
| H | -3.42943 | 2.44513  | -0.66558 |
| H | -3.85590 | 0.84624  | -0.01713 |

216

TS4 without dispersion

|   |         |         |          |
|---|---------|---------|----------|
| C | 3.23556 | 3.57613 | -1.80463 |
| C | 2.02504 | 3.23678 | -1.19114 |
| C | 0.90138 | 3.03297 | -1.99767 |
| C | 0.98552 | 3.15570 | -3.38420 |
| C | 2.19594 | 3.49702 | -3.98414 |
| C | 3.32149 | 3.71047 | -3.18846 |
| C | 1.92660 | 3.00814 | 0.30295  |
| N | 2.45878 | 4.10348 | 1.12547  |
| C | 1.96035 | 5.42246 | 0.71637  |
| C | 0.44990 | 5.55881 | 0.72674  |

|   |          |          |          |
|---|----------|----------|----------|
| C | -0.21266 | 6.05149  | -0.40185 |
| C | -1.59124 | 6.26072  | -0.38752 |
| C | -2.32986 | 5.97029  | 0.75750  |
| C | -1.68070 | 5.47153  | 1.88691  |
| C | -0.30242 | 5.26922  | 1.87064  |
| C | 3.05071  | 3.90066  | 2.35690  |
| N | 3.15091  | 2.71822  | 3.00696  |
| C | 2.72945  | 1.41352  | 2.62943  |
| C | 3.66579  | 0.53689  | 2.01080  |
| C | 3.28314  | -0.77371 | 1.71227  |
| C | 2.01693  | -1.25213 | 2.02304  |
| C | 1.11729  | -0.40599 | 2.65595  |
| C | 1.44482  | 0.91687  | 2.97275  |
| C | 5.07273  | 0.97530  | 1.63171  |
| C | 5.28500  | 0.97106  | 0.11030  |
| C | 0.40058  | 1.74984  | 3.69895  |
| C | -0.91061 | 1.87164  | 2.90991  |
| N | 3.58594  | 4.91449  | 3.09626  |
| Y | 4.08087  | 3.66659  | 5.02815  |
| C | 6.56948  | 3.41817  | 5.23871  |
| C | 6.95225  | 2.26304  | 5.01706  |
| C | 4.11102  | 6.16916  | 2.66961  |
| C | 3.53301  | 7.36796  | 3.17313  |
| C | 4.16224  | 8.59171  | 2.92937  |
| C | 5.32961  | 8.67256  | 2.18371  |
| C | 5.86461  | 7.50819  | 1.64976  |
| C | 5.28166  | 6.25575  | 1.86732  |
| C | 2.22185  | 7.38217  | 3.94258  |
| C | 2.42180  | 7.81317  | 5.40025  |
| C | 5.95678  | 5.04854  | 1.23379  |
| C | 6.17229  | 5.24905  | -0.27458 |
| C | 7.29711  | 4.72713  | 1.90867  |
| C | 1.16979  | 8.27899  | 3.27176  |
| C | 1.88884  | 4.27483  | 6.35605  |

|    |          |          |          |
|----|----------|----------|----------|
| Al | 3.26565  | 4.57844  | 7.88659  |
| C  | 2.85802  | 6.23800  | 8.86765  |
| Y  | 5.68856  | 2.44312  | 7.77523  |
| C  | 3.98132  | 1.39076  | 6.21035  |
| Al | 6.85936  | 5.20334  | 6.61324  |
| C  | 6.09200  | 6.99938  | 6.97906  |
| O  | 4.82629  | 4.36302  | 6.98961  |
| C  | 3.12811  | 3.00589  | 9.15576  |
| C  | 7.51480  | 4.18701  | 8.31350  |
| N  | 6.05896  | 1.28976  | 9.82312  |
| C  | 6.99637  | 0.41639  | 9.35911  |
| N  | 7.73274  | -0.39567 | 10.20438 |
| C  | 7.99497  | -0.01047 | 11.60022 |
| C  | 9.38999  | 0.53282  | 11.84941 |
| C  | 10.26357 | -0.14094 | 12.70860 |
| C  | 11.52821 | 0.37474  | 12.99258 |
| C  | 11.93834 | 1.57484  | 12.41660 |
| C  | 11.07557 | 2.25704  | 11.55789 |
| C  | 9.81285  | 1.73952  | 11.27849 |
| N  | 7.12091  | 0.48534  | 8.01584  |
| C  | 7.92667  | -0.25731 | 7.10558  |
| C  | 7.33256  | -1.34720 | 6.40315  |
| C  | 8.04533  | -1.96867 | 5.37322  |
| C  | 9.32025  | -1.55212 | 5.01255  |
| C  | 9.91053  | -0.51460 | 5.72062  |
| C  | 9.25135  | 0.13479  | 6.77086  |
| C  | 5.97374  | -1.92563 | 6.77603  |
| C  | 6.12961  | -3.28141 | 7.48506  |
| C  | 10.01157 | 1.22352  | 7.51175  |
| C  | 10.22652 | 2.46477  | 6.63655  |
| C  | 8.51896  | 5.63646  | 5.56379  |
| C  | 5.30667  | 1.20536  | 11.03011 |
| C  | 5.36493  | 2.27778  | 11.96320 |
| C  | 4.47717  | 2.30422  | 13.04259 |



|   |          |          |          |
|---|----------|----------|----------|
| C | 3.54602  | 1.29641  | 13.24340 |
| C | 3.51990  | 0.22608  | 12.35932 |
| C | 4.38052  | 0.14881  | 11.25949 |
| C | 6.38632  | 3.40083  | 11.86359 |
| C | 7.25955  | 3.49314  | 13.12505 |
| C | 4.24381  | -1.06177 | 10.34437 |
| C | 3.07192  | -0.91315 | 9.36300  |
| C | 5.72661  | 4.76055  | 11.59206 |
| C | 4.07354  | -2.37228 | 11.13047 |
| C | 5.03389  | -2.09611 | 5.57478  |
| C | 11.37128 | 0.73207  | 8.03362  |
| C | 6.14214  | 0.09979  | 2.29811  |
| C | 0.10629  | 1.17114  | 5.09261  |
| C | 8.66810  | -1.41079 | 9.71145  |
| C | 8.76191  | -2.65421 | 10.57185 |
| C | 10.01640 | -3.20961 | 10.84303 |
| C | 10.13060 | -4.39700 | 11.56474 |
| C | 8.98868  | -5.04174 | 12.03668 |
| C | 7.73323  | -4.49298 | 11.77706 |
| C | 7.62304  | -3.31162 | 11.04681 |
| H | 7.35540  | 1.29455  | 4.79626  |
| H | 1.90307  | 6.13227  | 9.40254  |
| H | 2.77687  | 7.13175  | 8.24090  |
| H | 3.61813  | 6.45324  | 9.62907  |
| H | 3.57208  | 2.00022  | 9.12207  |
| H | 2.05469  | 2.78174  | 9.04792  |
| H | 3.26185  | 3.33396  | 10.19259 |
| H | 6.90172  | 7.70531  | 7.21099  |
| H | 5.35897  | 7.04377  | 7.79114  |
| H | 5.60135  | 7.40109  | 6.08053  |
| H | 9.12253  | 4.80688  | 5.18123  |
| H | 9.17586  | 6.26544  | 6.18495  |
| H | 8.24114  | 6.25598  | 4.69936  |
| H | 7.83954  | -0.89108 | 12.23097 |

|   |          |          |          |
|---|----------|----------|----------|
| H | 7.25396  | 0.72352  | 11.90496 |
| H | 9.94917  | -1.07972 | 13.15784 |
| H | 12.19181 | -0.16306 | 13.66440 |
| H | 12.92187 | 1.98023  | 12.63755 |
| H | 11.38262 | 3.19965  | 11.11262 |
| H | 9.14214  | 2.28687  | 10.62137 |
| H | 9.67075  | -0.97793 | 9.62066  |
| H | 8.36307  | -1.70875 | 8.71031  |
| H | 10.91224 | -2.70484 | 10.48935 |
| H | 11.11411 | -4.81393 | 11.76410 |
| H | 9.07609  | -5.96378 | 12.60462 |
| H | 6.83618  | -4.98661 | 12.14124 |
| H | 6.64589  | -2.88521 | 10.84742 |
| H | 4.52360  | 3.13478  | 13.74236 |
| H | 2.85767  | 1.33607  | 14.08299 |
| H | 2.80079  | -0.57168 | 12.52172 |
| H | 7.04355  | 3.16470  | 11.02076 |
| H | 6.66945  | 3.79078  | 13.99872 |
| H | 8.04576  | 4.24357  | 12.98840 |
| H | 7.74518  | 2.54195  | 13.35964 |
| H | 5.12165  | 4.75323  | 10.68109 |
| H | 6.48334  | 5.54616  | 11.48892 |
| H | 5.06308  | 5.04514  | 12.41637 |
| H | 5.16256  | -1.15021 | 9.75733  |
| H | 2.12919  | -0.78364 | 9.90616  |
| H | 2.97959  | -1.80593 | 8.73396  |
| H | 3.19313  | -0.05244 | 8.70210  |
| H | 4.79362  | -2.45588 | 11.94986 |
| H | 4.20107  | -3.23293 | 10.46495 |
| H | 3.07174  | -2.45518 | 11.56516 |
| H | 7.58866  | -2.80145 | 4.84512  |
| H | 9.85292  | -2.04100 | 4.20158  |
| H | 10.91667 | -0.19822 | 5.45842  |
| H | 5.50362  | -1.23085 | 7.47952  |

|   |          |          |          |
|---|----------|----------|----------|
| H | 6.59692  | -4.01620 | 6.81976  |
| H | 5.14941  | -3.67519 | 7.77690  |
| H | 6.74624  | -3.21653 | 8.38480  |
| H | 4.90826  | -1.17093 | 5.00903  |
| H | 4.04242  | -2.41447 | 5.91415  |
| H | 5.39949  | -2.86275 | 4.88298  |
| H | 9.40951  | 1.51189  | 8.37984  |
| H | 10.85195 | 2.22339  | 5.76921  |
| H | 10.73554 | 3.25366  | 7.20093  |
| H | 9.28743  | 2.87602  | 6.26291  |
| H | 11.28565 | -0.17993 | 8.63038  |
| H | 11.83234 | 1.49921  | 8.66306  |
| H | 12.06266 | 0.52314  | 7.21021  |
| H | 0.87487  | 2.82991  | 0.55718  |
| H | 2.46727  | 2.09659  | 0.54710  |
| H | -0.04916 | 2.78039  | -1.53430 |
| H | 0.10149  | 2.99094  | -3.99422 |
| H | 2.26240  | 3.59788  | -5.06388 |
| H | 4.27031  | 3.97795  | -3.64571 |
| H | 4.11339  | 3.74334  | -1.18942 |
| H | 2.32708  | 5.63186  | -0.29311 |
| H | 2.39622  | 6.17831  | 1.36507  |
| H | 0.35798  | 6.27082  | -1.30094 |
| H | -2.08749 | 6.64658  | -1.27392 |
| H | -3.40431 | 6.13097  | 0.77139  |
| H | -2.24851 | 5.24433  | 2.78508  |
| H | 0.19669  | 4.88813  | 2.75772  |
| H | 3.99665  | -1.43300 | 1.22429  |
| H | 1.73763  | -2.27392 | 1.78145  |
| H | 0.13047  | -0.78071 | 2.91643  |
| H | 5.20739  | 1.99955  | 1.99357  |
| H | 5.20713  | -0.04454 | -0.29375 |
| H | 6.28299  | 1.34894  | -0.13856 |
| H | 4.55021  | 1.58676  | -0.41424 |

|   |          |          |          |
|---|----------|----------|----------|
| H | 5.99969  | 0.04149  | 3.37955  |
| H | 7.14269  | 0.50095  | 2.10244  |
| H | 6.11903  | -0.92484 | 1.91090  |
| H | 0.81222  | 2.75699  | 3.82723  |
| H | -0.76000 | 2.32301  | 1.92615  |
| H | -1.62683 | 2.49567  | 3.45534  |
| H | -1.37706 | 0.89177  | 2.76137  |
| H | -0.36703 | 0.18614  | 5.01404  |
| H | -0.57684 | 1.82383  | 5.64758  |
| H | 1.01875  | 1.04496  | 5.68189  |
| H | 6.77198  | 7.56754  | 1.05461  |
| H | 5.81202  | 9.63074  | 2.01259  |
| H | 3.72120  | 9.49990  | 3.33184  |
| H | 5.29925  | 4.18329  | 1.36160  |
| H | 5.25705  | 5.57366  | -0.77792 |
| H | 6.51525  | 4.31777  | -0.73958 |
| H | 6.93944  | 6.00536  | -0.47153 |
| H | 8.00217  | 5.55658  | 1.78587  |
| H | 7.75082  | 3.83538  | 1.46008  |
| H | 7.18555  | 4.54728  | 2.97962  |
| H | 1.83460  | 6.35720  | 3.93536  |
| H | 3.16372  | 7.19654  | 5.91355  |
| H | 1.48068  | 7.75019  | 5.95768  |
| H | 2.77335  | 8.84932  | 5.45597  |
| H | 1.46984  | 9.33222  | 3.29581  |
| H | 0.21262  | 8.19854  | 3.79847  |
| H | 0.99895  | 8.00323  | 2.22762  |
| H | 8.31564  | 4.92807  | 8.44029  |
| H | 8.06936  | 3.23534  | 8.34840  |
| H | 3.74910  | 1.07748  | 5.17684  |
| H | 4.57046  | 0.52083  | 6.55069  |
| H | 3.02814  | 1.31952  | 6.75226  |
| H | 6.92536  | 4.27838  | 9.23796  |
| H | 1.02120  | 4.51519  | 6.98690  |

|   |         |         |         |
|---|---------|---------|---------|
| H | 1.78781 | 4.98584 | 5.52127 |
| H | 1.64530 | 3.26924 | 5.97976 |

216

Complex9 without dispersion

|   |          |          |          |
|---|----------|----------|----------|
| C | -2.04799 | 1.31592  | -7.73209 |
| C | -3.20726 | 0.86665  | -7.09198 |
| C | -4.31826 | 0.53630  | -7.87443 |
| C | -4.26993 | 0.64231  | -9.26373 |
| C | -3.11000 | 1.09325  | -9.89126 |
| C | -1.99916 | 1.43266  | -9.11958 |
| C | -3.26373 | 0.65659  | -5.59255 |
| N | -2.67401 | 1.74407  | -4.80612 |
| C | -3.23608 | 3.06152  | -5.14211 |
| C | -4.73943 | 3.16258  | -4.96691 |
| C | -5.55758 | 3.44573  | -6.06482 |
| C | -6.93419 | 3.60661  | -5.90846 |
| C | -7.51255 | 3.48341  | -4.64717 |
| C | -6.70685 | 3.19779  | -3.54444 |
| C | -5.33249 | 3.03798  | -3.70458 |
| C | -1.99453 | 1.53635  | -3.61948 |
| N | -1.91690 | 0.37133  | -2.93830 |
| C | -2.36649 | -0.93593 | -3.28281 |
| C | -1.45829 | -1.82226 | -3.93083 |
| C | -1.84632 | -3.14299 | -4.17039 |
| C | -3.09155 | -3.62007 | -3.78261 |
| C | -3.97188 | -2.75616 | -3.14746 |
| C | -3.64122 | -1.42105 | -2.88910 |
| C | -0.08940 | -1.38120 | -4.43068 |
| C | -0.01749 | -1.40895 | -5.96607 |
| C | -4.68367 | -0.56273 | -2.18924 |
| C | -6.00025 | -0.48243 | -2.97603 |
| N | -1.34387 | 2.54086  | -2.96584 |
| Y | -0.87850 | 1.32358  | -0.98987 |
| C | 1.31950  | 0.29217  | -0.87217 |

|    |          |          |          |
|----|----------|----------|----------|
| C  | 2.30914  | -0.42549 | -1.02616 |
| C  | -0.80746 | 3.73855  | -3.52197 |
| C  | -1.25790 | 4.99368  | -3.03022 |
| C  | -0.62298 | 6.16834  | -3.44349 |
| C  | 0.42895  | 6.14367  | -4.34615 |
| C  | 0.84826  | 4.92032  | -4.85269 |
| C  | 0.25793  | 3.71371  | -4.46495 |
| C  | -2.42979 | 5.11597  | -2.07180 |
| C  | -1.96781 | 5.55820  | -0.67864 |
| C  | 0.83354  | 2.42403  | -5.03106 |
| C  | 1.25664  | 2.54930  | -6.50269 |
| C  | 2.02885  | 1.93903  | -4.19851 |
| C  | -3.52051 | 6.06393  | -2.59223 |
| C  | -3.12322 | 1.97882  | 0.24224  |
| Al | -1.88829 | 2.24337  | 1.88432  |
| C  | -2.33071 | 3.97896  | 2.71206  |
| Y  | 0.78864  | 0.01604  | 1.64664  |
| C  | -1.16382 | -0.89291 | 0.36000  |
| Al | 1.28200  | 3.16303  | 1.21315  |
| C  | 1.08327  | 4.73744  | 2.38984  |
| O  | -0.21690 | 2.06479  | 1.10098  |
| C  | -2.12103 | 0.74418  | 3.18121  |
| C  | 2.61744  | 1.85057  | 2.09807  |
| N  | 1.05409  | -1.09688 | 3.73422  |
| C  | 2.03637  | -1.96011 | 3.34822  |
| N  | 2.68448  | -2.81080 | 4.22551  |
| C  | 2.76513  | -2.53657 | 5.66570  |
| C  | 4.11595  | -2.04180 | 6.14668  |
| C  | 4.73111  | -2.65617 | 7.24209  |
| C  | 5.92922  | -2.16451 | 7.75926  |
| C  | 6.53516  | -1.05153 | 7.18024  |
| C  | 5.93436  | -0.43464 | 6.08303  |
| C  | 4.73498  | -0.92606 | 5.57222  |
| N  | 2.28761  | -1.84671 | 2.02494  |

|   |          |          |          |
|---|----------|----------|----------|
| C | 3.18385  | -2.56049 | 1.18122  |
| C | 2.69088  | -3.68212 | 0.45407  |
| C | 3.50421  | -4.29475 | -0.50230 |
| C | 4.78995  | -3.83952 | -0.76519 |
| C | 5.27604  | -2.75733 | -0.04433 |
| C | 4.50580  | -2.10497 | 0.92639  |
| C | 1.31098  | -4.27641 | 0.69751  |
| C | 1.39729  | -5.73555 | 1.17277  |
| C | 5.14549  | -0.92652 | 1.64625  |
| C | 5.50448  | 0.21084  | 0.67511  |
| C | 1.85663  | 3.62838  | -0.63565 |
| C | 0.24437  | -1.14821 | 4.90718  |
| C | 0.32133  | -0.08630 | 5.84976  |
| C | -0.59522 | -0.02985 | 6.90268  |
| C | -1.57386 | -1.00020 | 7.06615  |
| C | -1.62457 | -2.05724 | 6.16816  |
| C | -0.73723 | -2.15894 | 5.09169  |
| C | 1.38833  | 0.99292  | 5.77164  |
| C | 2.17751  | 1.13292  | 7.08168  |
| C | -0.90330 | -3.34991 | 4.15946  |
| C | -2.18094 | -3.23939 | 3.31405  |
| C | 0.78971  | 2.34738  | 5.37318  |
| C | -0.91495 | -4.67827 | 4.93115  |
| C | 0.41625  | -4.19452 | -0.54572 |
| C | 6.40683  | -1.33915 | 2.42030  |
| C | 1.04855  | -2.22980 | -3.85108 |
| C | -4.97135 | -1.07927 | -0.77041 |
| C | 3.66595  | -3.81259 | 3.78481  |
| C | 3.68824  | -5.07857 | 4.61666  |
| C | 4.89125  | -5.52633 | 5.17055  |
| C | 4.95008  | -6.72975 | 5.87325  |
| C | 3.80027  | -7.49850 | 6.04073  |
| C | 2.59350  | -7.05894 | 5.49633  |
| C | 2.54156  | -5.86162 | 4.78654  |

|   |          |          |          |
|---|----------|----------|----------|
| H | 3.16659  | -1.04868 | -1.17695 |
| H | -3.41747 | 4.04182  | 2.87090  |
| H | -2.03762 | 4.87010  | 2.15001  |
| H | -1.86993 | 4.06401  | 3.70400  |
| H | -1.48907 | -0.15468 | 3.18714  |
| H | -3.13642 | 0.34579  | 3.03511  |
| H | -2.08295 | 1.12199  | 4.21009  |
| H | 2.07448  | 5.18142  | 2.56593  |
| H | 0.63749  | 4.55255  | 3.37203  |
| H | 0.48092  | 5.51883  | 1.90923  |
| H | 2.59010  | 2.92814  | -1.05036 |
| H | 2.33667  | 4.61712  | -0.59942 |
| H | 1.06809  | 3.74370  | -1.39564 |
| H | 2.51352  | -3.45584 | 6.20402  |
| H | 2.00248  | -1.80860 | 5.92984  |
| H | 4.26601  | -3.52983 | 7.69229  |
| H | 6.38989  | -2.65483 | 8.61265  |
| H | 7.46877  | -0.66597 | 7.58042  |
| H | 6.39743  | 0.43656  | 5.62765  |
| H | 4.26981  | -0.43117 | 4.72382  |
| H | 4.67162  | -3.37705 | 3.79441  |
| H | 3.44941  | -4.08221 | 2.75396  |
| H | 5.78914  | -4.92474 | 5.05315  |
| H | 5.89512  | -7.06248 | 6.29393  |
| H | 3.84297  | -8.43430 | 6.59110  |
| H | 1.69147  | -7.65237 | 5.61913  |
| H | 1.60240  | -5.52536 | 4.36070  |
| H | -0.53636 | 0.79254  | 7.61088  |
| H | -2.28323 | -0.93831 | 7.88672  |
| H | -2.38522 | -2.82286 | 6.29655  |
| H | 2.09444  | 0.68730  | 4.99191  |
| H | 1.54680  | 1.51092  | 7.89352  |
| H | 3.00088  | 1.84349  | 6.95132  |
| H | 2.60641  | 0.18057  | 7.40492  |



|   |          |          |           |
|---|----------|----------|-----------|
| H | 0.25016  | 2.29439  | 4.42348   |
| H | 1.57150  | 3.10762  | 5.27435   |
| H | 0.07688  | 2.69469  | 6.12951   |
| H | -0.04997 | -3.36904 | 3.47487   |
| H | -3.06968 | -3.23198 | 3.95475   |
| H | -2.26709 | -4.09257 | 2.63146   |
| H | -2.19814 | -2.32546 | 2.71731   |
| H | -0.06539 | -4.75878 | 5.61446   |
| H | -0.88552 | -5.52539 | 4.23632   |
| H | -1.82738 | -4.78648 | 5.52716   |
| H | 3.11725  | -5.14892 | -1.05185  |
| H | 5.40718  | -4.32608 | -1.51527  |
| H | 6.28505  | -2.40210 | -0.23804  |
| H | 0.83709  | -3.68921 | 1.49063   |
| H | 1.80024  | -6.38423 | 0.38707   |
| H | 0.40040  | -6.11286 | 1.42691   |
| H | 2.03738  | -5.85175 | 2.05135   |
| H | 0.31107  | -3.16861 | -0.90311  |
| H | -0.58531 | -4.57894 | -0.32388  |
| H | 0.82461  | -4.79327 | -1.36729  |
| H | 4.41635  | -0.54253 | 2.36725   |
| H | 6.28424  | -0.10520 | -0.02702  |
| H | 5.88971  | 1.07603  | 1.22557   |
| H | 4.64484  | 0.54280  | 0.08671   |
| H | 6.20322  | -2.11528 | 3.16172   |
| H | 6.82717  | -0.47760 | 2.94957   |
| H | 7.18027  | -1.71854 | 1.74379   |
| H | -4.31081 | 0.50943  | -5.30228  |
| H | -2.74219 | -0.26830 | -5.35544  |
| H | -5.23066 | 0.19607  | -7.39027  |
| H | -5.14293 | 0.37917  | -9.85496  |
| H | -3.07240 | 1.18225  | -10.97342 |
| H | -1.09010 | 1.78690  | -9.59821  |
| H | -1.18322 | 1.58234  | -7.13343  |

|   |          |          |          |
|---|----------|----------|----------|
| H | -2.98319 | 3.28948  | -6.18199 |
| H | -2.74664 | 3.81592  | -4.53262 |
| H | -5.11042 | 3.53929  | -7.05127 |
| H | -7.55342 | 3.82848  | -6.77347 |
| H | -8.58421 | 3.61125  | -4.52161 |
| H | -7.14913 | 3.10625  | -2.55602 |
| H | -4.71096 | 2.82373  | -2.83887 |
| H | -1.15365 | -3.81142 | -4.67536 |
| H | -3.37260 | -4.65185 | -3.97506 |
| H | -4.94799 | -3.12423 | -2.84156 |
| H | 0.06951  | -0.35184 | -4.09667 |
| H | -0.13860 | -2.42965 | -6.34596 |
| H | 0.95757  | -1.04495 | -6.30905 |
| H | -0.78914 | -0.79297 | -6.43513 |
| H | 1.05854  | -2.19252 | -2.76094 |
| H | 2.01507  | -1.85757 | -4.20864 |
| H | 0.96727  | -3.27837 | -4.15852 |
| H | -4.28042 | 0.45240  | -2.11216 |
| H | -5.85881 | -0.06712 | -3.97683 |
| H | -6.71752 | 0.15816  | -2.45253 |
| H | -6.45911 | -1.47098 | -3.08506 |
| H | -5.44376 | -2.06735 | -0.80390 |
| H | -5.65471 | -0.40370 | -0.24384 |
| H | -4.05813 | -1.17632 | -0.17768 |
| H | 1.67035  | 4.89928  | -5.56162 |
| H | 0.91516  | 7.06448  | -4.65603 |
| H | -0.96848 | 7.12066  | -3.04998 |
| H | 0.05637  | 1.65547  | -4.98139 |
| H | 0.49051  | 3.03822  | -7.11240 |
| H | 1.45325  | 1.55759  | -6.92344 |
| H | 2.18092  | 3.12697  | -6.61047 |
| H | 2.82848  | 2.68815  | -4.20858 |
| H | 2.43231  | 1.00558  | -4.60805 |
| H | 1.76191  | 1.75621  | -3.15558 |

|           |          |          |          |
|-----------|----------|----------|----------|
| H         | -2.87506 | 4.11890  | -1.98518 |
| H         | -1.21615 | 4.88137  | -0.26103 |
| H         | -2.81101 | 5.59836  | 0.01818  |
| H         | -1.51536 | 6.55543  | -0.71694 |
| H         | -3.16117 | 7.09683  | -2.65299 |
| H         | -4.38150 | 6.05730  | -1.91489 |
| H         | -3.87534 | 5.77400  | -3.58535 |
| H         | 3.40924  | 2.61336  | 2.12696  |
| H         | 3.12154  | 1.02263  | 1.57768  |
| H         | -1.43454 | -1.19311 | -0.66816 |
| H         | -0.67228 | -1.82287 | 0.70593  |
| H         | -2.10508 | -0.84093 | 0.92013  |
| H         | 2.49220  | 1.56945  | 3.15426  |
| H         | -4.02890 | 2.05774  | 0.86141  |
| H         | -3.22162 | 2.80872  | -0.47200 |
| H         | -3.30843 | 1.03974  | -0.30239 |
| 2         |          |          |          |
| CO        |          |          |          |
| C         | -0.30574 | -3.96313 | 1.59426  |
| O         | -0.69199 | -4.69365 | 2.37526  |
| 214       |          |          |          |
| Complex 1 |          |          |          |
| C         | 4.03742  | -0.78235 | -2.64631 |
| C         | 2.88480  | -1.52655 | -3.00777 |
| C         | 2.47032  | -1.54437 | -4.35916 |
| C         | 3.23716  | -0.86656 | -5.31237 |
| C         | 4.38158  | -0.16294 | -4.96652 |
| C         | 4.76628  | -0.11772 | -3.63209 |
| N         | 2.15983  | -2.12462 | -1.94808 |
| C         | 1.97952  | -3.42073 | -1.65606 |
| N         | 2.49690  | -4.49018 | -2.35320 |
| C         | 3.66807  | -4.34604 | -3.20336 |
| C         | 4.53635  | -5.58220 | -3.25657 |
| C         | 5.31348  | -5.79977 | -4.39707 |

|    |          |          |          |
|----|----------|----------|----------|
| C  | 6.17512  | -6.89128 | -4.47528 |
| C  | 6.25834  | -7.79193 | -3.41508 |
| C  | 5.47556  | -7.59091 | -2.27962 |
| C  | 4.62212  | -6.49374 | -2.19826 |
| C  | 1.19027  | -2.20635 | -4.81659 |
| C  | 0.16490  | -1.14550 | -5.23654 |
| C  | 4.47984  | -0.66369 | -1.20216 |
| C  | 4.15541  | 0.73147  | -0.65594 |
| Y  | 0.44453  | -1.39701 | -0.44987 |
| C  | 1.82319  | -0.87997 | 1.62802  |
| Al | 0.01796  | -1.46811 | 2.48493  |
| C  | 0.26914  | -2.93949 | 3.76181  |
| Y  | -1.81008 | 0.65199  | 1.36148  |
| C  | -0.31860 | 0.34363  | 3.45315  |
| Al | -2.52951 | -1.58304 | -0.52198 |
| C  | -3.86010 | -3.00126 | -0.81780 |
| N  | -1.93798 | 3.01932  | 1.73040  |
| C  | -1.23426 | 4.13029  | 1.22467  |
| C  | -0.00601 | 4.54510  | 1.78897  |
| C  | 0.70804  | 5.58072  | 1.18247  |
| C  | 0.24423  | 6.20950  | 0.03431  |
| C  | -0.95037 | 5.78164  | -0.53192 |
| C  | -1.69230 | 4.74324  | 0.03265  |
| C  | 0.57172  | 3.88960  | 3.02543  |
| C  | 1.87399  | 3.14784  | 2.69902  |
| C  | -2.97603 | 4.30750  | -0.64422 |
| C  | -2.74424 | 3.86601  | -2.09250 |
| N  | -3.57081 | 1.67675  | 2.45203  |
| C  | -4.86957 | 1.21518  | 2.69967  |
| C  | -6.03137 | 1.83916  | 2.17612  |
| C  | -7.28392 | 1.29694  | 2.47708  |
| C  | -7.42193 | 0.13961  | 3.22934  |
| C  | -6.27642 | -0.52303 | 3.65612  |
| C  | -5.00432 | -0.02116 | 3.38832  |

|   |          |          |          |
|---|----------|----------|----------|
| C | -5.98508 | 3.02817  | 1.23577  |
| C | -6.50076 | 2.62802  | -0.15240 |
| C | -3.79236 | -0.79931 | 3.85900  |
| C | -3.93022 | -2.31162 | 3.68812  |
| C | -0.04844 | 1.18019  | -0.35706 |
| C | -1.32425 | -1.70142 | 1.04611  |
| C | -3.57865 | 0.21530  | -0.48038 |
| N | 1.17497  | -3.61981 | -0.57988 |
| C | 1.39900  | -4.73280 | 0.26128  |
| C | 2.69303  | -4.97456 | 0.79901  |
| C | 2.92947  | -6.15727 | 1.50128  |
| C | 1.91106  | -7.06928 | 1.75269  |
| C | 0.62165  | -6.76121 | 1.34261  |
| C | 0.34021  | -5.60539 | 0.60755  |
| C | 3.77482  | -3.90707 | 0.82482  |
| C | 3.93727  | -3.42089 | 2.27371  |
| C | -1.10030 | -5.33003 | 0.23025  |
| C | -1.95745 | -5.17225 | 1.49168  |
| C | -1.39433 | -1.31113 | -2.23224 |
| C | -3.06929 | 2.93355  | 2.45296  |
| N | -3.62270 | 3.94936  | 3.20064  |
| C | -4.33358 | 3.60088  | 4.42912  |
| C | -3.43119 | 3.43310  | 5.62782  |
| C | -2.10446 | 3.02478  | 5.48880  |
| C | -1.29328 | 2.84022  | 6.60584  |
| C | -1.80405 | 3.06130  | 7.88277  |
| C | -3.12901 | 3.47230  | 8.03149  |
| C | -3.93388 | 3.66132  | 6.91134  |
| C | -2.95518 | 5.26219  | 3.23289  |
| C | -3.76554 | 6.30595  | 3.95106  |
| C | -3.43530 | 6.68072  | 5.25588  |
| C | -4.19648 | 7.63031  | 5.93377  |
| C | -5.29687 | 8.21632  | 5.31144  |
| C | -5.62676 | 7.85656  | 4.00487  |

|   |          |          |          |
|---|----------|----------|----------|
| C | -4.86193 | 6.91004  | 3.32918  |
| C | 1.65851  | -5.67977 | -2.55278 |
| C | 0.53853  | -5.52925 | -3.55227 |
| C | 0.54550  | -6.26912 | -4.73605 |
| C | -0.52101 | -6.19164 | -5.63155 |
| C | -1.60321 | -5.35795 | -5.35751 |
| C | -1.61947 | -4.61159 | -4.17813 |
| C | -0.56181 | -4.70821 | -3.28048 |
| C | 0.80277  | 4.88032  | 4.17076  |
| C | -4.03557 | 5.41131  | -0.57317 |
| C | -6.76205 | 4.22927  | 1.77919  |
| C | -3.41088 | -0.42388 | 5.29242  |
| C | 5.13682  | -4.32590 | 0.27135  |
| C | -1.68712 | -6.42468 | -0.66685 |
| C | 1.39480  | -3.19246 | -5.96883 |
| C | 5.96053  | -0.99620 | -1.00658 |
| H | 0.76798  | 1.02948  | -1.09032 |
| H | -0.80695 | 1.70151  | -0.96419 |
| H | 0.36767  | 1.96739  | 0.29246  |
| H | -1.87281 | -2.52584 | 1.52834  |
| H | -4.39827 | 0.25596  | 0.24956  |
| H | -3.21806 | 1.24806  | -0.62718 |
| H | -4.06591 | -0.00071 | -1.44032 |
| H | -2.25170 | -1.33786 | -2.91585 |
| H | -0.94796 | -0.32210 | -2.41878 |
| H | -0.72193 | -2.06884 | -2.65995 |
| H | -4.46633 | -3.19937 | 0.07434  |
| H | -3.39299 | -3.94914 | -1.10801 |
| H | -4.55955 | -2.72948 | -1.61962 |
| H | 2.34326  | -0.76141 | 2.58577  |
| H | 1.87545  | 0.12131  | 1.17550  |
| H | 2.48992  | -1.54699 | 1.06421  |
| H | -1.26645 | 0.67066  | 3.90666  |
| H | 0.28601  | 0.06195  | 4.32457  |

|   |          |          |          |
|---|----------|----------|----------|
| H | 0.18912  | 1.23063  | 3.05515  |
| H | 0.58094  | -3.85366 | 3.24179  |
| H | -0.64415 | -3.18275 | 4.31882  |
| H | 1.04247  | -2.71100 | 4.50719  |
| H | -2.77789 | 5.58197  | 2.20744  |
| H | -1.97714 | 5.17228  | 3.71476  |
| H | -2.58794 | 6.21011  | 5.74600  |
| H | -3.93069 | 7.90968  | 6.94912  |
| H | -5.89249 | 8.95538  | 5.83942  |
| H | -6.47727 | 8.31714  | 3.51065  |
| H | -5.11764 | 6.63155  | 2.31176  |
| H | -4.90211 | 2.68601  | 4.26666  |
| H | -5.06568 | 4.38587  | 4.63293  |
| H | -1.70037 | 2.85159  | 4.49884  |
| H | -0.26403 | 2.52036  | 6.47236  |
| H | -1.17509 | 2.91862  | 8.75648  |
| H | -3.53367 | 3.65417  | 9.02309  |
| H | -4.96005 | 4.00051  | 7.02965  |
| H | 1.64856  | 5.89975  | 1.62394  |
| H | 0.81091  | 7.01731  | -0.41902 |
| H | -1.31442 | 6.25773  | -1.43865 |
| H | -0.15969 | 3.15272  | 3.36473  |
| H | -0.11570 | 5.40385  | 4.44940  |
| H | 1.54534  | 5.63732  | 3.89801  |
| H | 1.17059  | 4.35769  | 5.05958  |
| H | 2.24687  | 2.61007  | 3.57750  |
| H | 2.65179  | 3.84817  | 2.37691  |
| H | 1.73406  | 2.42356  | 1.89182  |
| H | -3.35752 | 3.43977  | -0.09922 |
| H | -4.27196 | 5.66276  | 0.46422  |
| H | -4.96184 | 5.09735  | -1.06339 |
| H | -3.68579 | 6.32416  | -1.06648 |
| H | -1.97869 | 3.08679  | -2.15070 |
| H | -2.41361 | 4.70019  | -2.72015 |

|   |          |          |          |
|---|----------|----------|----------|
| H | -3.67044 | 3.47017  | -2.52238 |
| H | -8.17179 | 1.78893  | 2.08904  |
| H | -8.40635 | -0.25997 | 3.45355  |
| H | -6.37132 | -1.45464 | 4.20503  |
| H | -4.94687 | 3.33692  | 1.11927  |
| H | -6.37769 | 4.54678  | 2.75066  |
| H | -7.82547 | 3.99607  | 1.89705  |
| H | -6.68704 | 5.07652  | 1.08951  |
| H | -6.45610 | 3.47832  | -0.84076 |
| H | -7.54176 | 2.29176  | -0.10682 |
| H | -5.90302 | 1.81510  | -0.57219 |
| H | -2.94166 | -0.51935 | 3.22670  |
| H | -3.24727 | 0.65201  | 5.38994  |
| H | -2.49636 | -0.94174 | 5.60088  |
| H | -4.21452 | -0.70553 | 5.98153  |
| H | -4.23142 | -2.56765 | 2.66852  |
| H | -4.66199 | -2.73852 | 4.38139  |
| H | -2.96942 | -2.79442 | 3.88804  |
| H | 1.25378  | -5.98834 | -1.58715 |
| H | 2.31677  | -6.48374 | -2.88044 |
| H | 1.39285  | -6.91487 | -4.95446 |
| H | -0.50237 | -6.77734 | -6.54616 |
| H | -2.43399 | -5.29541 | -6.05442 |
| H | -2.46451 | -3.97101 | -3.94357 |
| H | -0.59197 | -4.16871 | -2.34076 |
| H | 4.25951  | -3.51665 | -2.80587 |
| H | 3.40079  | -4.05885 | -4.22648 |
| H | 5.24175  | -5.10434 | -5.23036 |
| H | 6.77432  | -7.04294 | -5.36858 |
| H | 6.92304  | -8.64868 | -3.47670 |
| H | 5.52542  | -8.29154 | -1.45099 |
| H | 4.01036  | -6.34811 | -1.31297 |
| H | 3.92499  | -6.34426 | 1.89597  |
| H | 2.11313  | -7.98617 | 2.29866  |



|   |          |          |          |
|---|----------|----------|----------|
| H | -0.19333 | -7.43704 | 1.58620  |
| H | 3.42756  | -3.06404 | 0.22452  |
| H | 5.11635  | -4.47234 | -0.80829 |
| H | 5.48894  | -5.25840 | 0.72455  |
| H | 5.88056  | -3.55430 | 0.49090  |
| H | 4.57631  | -2.53141 | 2.31330  |
| H | 4.40263  | -4.19850 | 2.88859  |
| H | 2.97178  | -3.17909 | 2.72258  |
| H | -1.12280 | -4.37565 | -0.30421 |
| H | -1.09364 | -6.57907 | -1.57011 |
| H | -2.70445 | -6.16278 | -0.97610 |
| H | -1.73989 | -7.37892 | -0.13128 |
| H | -1.51514 | -4.44752 | 2.17734  |
| H | -2.04827 | -6.12417 | 2.02643  |
| H | -2.96533 | -4.83683 | 1.22997  |
| H | 2.91620  | -0.88582 | -6.35010 |
| H | 4.96087  | 0.35478  | -5.72555 |
| H | 5.65031  | 0.44568  | -3.34687 |
| H | 0.77938  | -2.76648 | -3.97508 |
| H | 2.09154  | -3.99232 | -5.70998 |
| H | 1.77740  | -2.68709 | -6.86192 |
| H | 0.44301  | -3.66168 | -6.22798 |
| H | 0.03377  | -0.38412 | -4.46480 |
| H | -0.80733 | -1.61068 | -5.43017 |
| H | 0.48893  | -0.63898 | -6.15245 |
| H | 3.90029  | -1.38921 | -0.62846 |
| H | 6.20313  | -1.98029 | -1.41711 |
| H | 6.21100  | -0.99980 | 0.05951  |
| H | 6.61043  | -0.26078 | -1.49259 |
| H | 3.09607  | 0.97532  | -0.78426 |
| H | 4.72981  | 1.49968  | -1.18537 |
| H | 4.39188  | 0.79943  | 0.41113  |

216

Int1

|   |          |         |          |
|---|----------|---------|----------|
| C | -2.56059 | 6.64737 | 4.55972  |
| C | -2.44983 | 5.48817 | 3.78910  |
| C | -1.43764 | 4.57456 | 4.09558  |
| C | -0.54944 | 4.81486 | 5.13882  |
| C | -0.66595 | 5.97687 | 5.90106  |
| C | -1.67756 | 6.89042 | 5.61107  |
| C | -3.42062 | 5.21980 | 2.66234  |
| N | -2.76474 | 4.83336 | 1.40888  |
| C | -1.95137 | 5.91071 | 0.82538  |
| C | -2.66710 | 7.23418 | 0.77531  |
| C | -2.29785 | 8.26446 | 1.64375  |
| C | -2.95176 | 9.49442 | 1.60670  |
| C | -3.98352 | 9.70807 | 0.69517  |
| C | -4.34746 | 8.69125 | -0.18734 |
| C | -3.68861 | 7.46577 | -0.15029 |
| C | -2.36462 | 3.52153 | 1.25054  |
| N | -3.02565 | 2.49273 | 1.83905  |
| C | -4.35758 | 2.43108 | 2.28413  |
| C | -5.45995 | 2.68749 | 1.43098  |
| C | -6.75248 | 2.48722 | 1.92207  |
| C | -6.98389 | 2.01746 | 3.20883  |
| C | -5.89915 | 1.74677 | 4.03455  |
| C | -4.59072 | 1.95164 | 3.59806  |
| C | -5.29677 | 3.17324 | 0.00515  |
| C | -6.00908 | 2.26586 | -1.00387 |
| C | -3.43469 | 1.64674 | 4.52613  |
| C | -3.23599 | 0.13454 | 4.67445  |
| Y | -1.61517 | 0.75736 | 1.21225  |
| N | -1.28938 | 3.09439 | 0.57908  |
| C | -0.37943 | 3.75911 | -0.26912 |
| C | 0.81861  | 4.34022 | 0.20981  |
| C | 1.71923  | 4.88933 | -0.70536 |
| C | 1.47881  | 4.85853 | -2.07274 |
| C | 0.31747  | 4.25729 | -2.54250 |

|    |          |          |          |
|----|----------|----------|----------|
| C  | -0.61599 | 3.70219  | -1.66659 |
| C  | 1.17081  | 4.37287  | 1.68257  |
| C  | 2.32207  | 3.40620  | 1.98266  |
| C  | -1.89117 | 3.09912  | -2.21960 |
| C  | -1.66643 | 2.25691  | -3.47706 |
| Y  | 0.33320  | -2.05751 | 0.03426  |
| C  | -1.84619 | -2.58654 | -1.21443 |
| Al | -2.65901 | -1.99172 | 0.59325  |
| C  | -3.97149 | -3.30699 | 1.23882  |
| C  | 2.20247  | -3.26935 | -1.78118 |
| N  | 1.84033  | -1.97226 | -1.85949 |
| C  | 1.83123  | -1.12815 | -2.98911 |
| C  | 2.53486  | 0.10229  | -2.93438 |
| C  | 2.35004  | 1.04545  | -3.94655 |
| C  | 1.51723  | 0.79214  | -5.02814 |
| C  | 0.85639  | -0.42845 | -5.10015 |
| C  | 0.98473  | -1.39156 | -4.09729 |
| C  | 3.52017  | 0.40518  | -1.82507 |
| C  | 3.12095  | 1.63382  | -1.00769 |
| C  | 0.22592  | -2.69523 | -4.23183 |
| C  | -1.23204 | -2.50211 | -4.65971 |
| N  | 3.13555  | -3.84364 | -2.61420 |
| C  | 4.13245  | -3.00620 | -3.27632 |
| C  | 5.39477  | -2.81631 | -2.47109 |
| C  | 6.64312  | -2.92258 | -3.08743 |
| C  | 7.81259  | -2.67607 | -2.37088 |
| C  | 7.74559  | -2.32459 | -1.02410 |
| C  | 6.50296  | -2.22519 | -0.39946 |
| C  | 5.33825  | -2.47382 | -1.11851 |
| C  | 3.57259  | -5.23369 | -2.41176 |
| C  | 4.29912  | -5.80302 | -3.60157 |
| C  | 3.61837  | -6.10016 | -4.78648 |
| C  | 4.29786  | -6.62351 | -5.88248 |
| C  | 5.66909  | -6.86677 | -5.80403 |

|    |          |          |          |
|----|----------|----------|----------|
| C  | 6.35290  | -6.58830 | -4.62274 |
| C  | 5.67003  | -6.05899 | -3.52931 |
| N  | 1.56200  | -3.89921 | -0.77625 |
| C  | 1.68380  | -5.21535 | -0.27249 |
| C  | 2.58143  | -5.51450 | 0.77673  |
| C  | 2.57275  | -6.79381 | 1.33744  |
| C  | 1.70316  | -7.77843 | 0.88750  |
| C  | 0.81825  | -7.47898 | -0.14106 |
| C  | 0.78710  | -6.21291 | -0.72676 |
| C  | 3.53417  | -4.47953 | 1.33675  |
| C  | 3.13179  | -4.07891 | 2.76011  |
| C  | -0.20665 | -5.94376 | -1.83814 |
| C  | -1.64884 | -6.08468 | -1.33784 |
| C  | 4.99161  | -4.94750 | 1.30423  |
| C  | 0.02942  | -6.84827 | -3.05214 |
| C  | -0.30459 | -3.96095 | 1.59193  |
| C  | -1.21595 | -1.52255 | 1.87319  |
| Al | 0.37681  | -0.83691 | 2.83275  |
| C  | 0.10878  | 1.17726  | 3.18126  |
| C  | 2.05026  | -0.92802 | 1.59818  |
| O  | -0.69314 | -4.69583 | 2.37759  |
| C  | 4.93579  | 0.59720  | -2.38423 |
| C  | 0.94104  | -3.63267 | -5.21006 |
| C  | 0.74192  | -1.66287 | 4.58232  |
| C  | -3.68920 | -0.27553 | 0.05028  |
| C  | -0.28722 | 0.31374  | -0.77138 |
| C  | -5.80089 | 4.61244  | -0.13511 |
| C  | -3.57126 | 2.33171  | 5.88698  |
| C  | 1.53422  | 5.77248  | 2.19114  |
| C  | -2.93228 | 4.19442  | -2.47498 |
| H  | 0.37399  | -0.06692 | -1.55750 |
| H  | -1.21951 | 0.50056  | -1.33013 |
| H  | 0.14016  | 1.31307  | -0.59797 |
| H  | -1.62618 | -2.07778 | 2.73295  |

|   |          |          |          |
|---|----------|----------|----------|
| H | -4.33555 | 0.17381  | 0.81805  |
| H | -3.36364 | 0.53872  | -0.61946 |
| H | -4.38061 | -0.84411 | -0.58601 |
| H | -2.80308 | -2.85383 | -1.67839 |
| H | -1.43332 | -1.81155 | -1.87572 |
| H | -1.24874 | -3.49861 | -1.35204 |
| H | -4.48312 | -2.94635 | 2.14041  |
| H | -3.50150 | -4.26208 | 1.50317  |
| H | -4.74977 | -3.52689 | 0.49661  |
| H | 2.72455  | -0.48859 | 2.34403  |
| H | 2.12325  | -0.24847 | 0.73683  |
| H | 2.56257  | -1.86418 | 1.32624  |
| H | -0.63027 | 1.28807  | 3.98600  |
| H | 1.08149  | 1.34781  | 3.65838  |
| H | 0.01359  | 2.05458  | 2.52471  |
| H | 1.71809  | -1.37532 | 4.99369  |
| H | 0.72304  | -2.75827 | 4.53754  |
| H | -0.01566 | -1.36694 | 5.31956  |
| H | -1.66714 | 5.61923  | -0.18321 |
| H | -1.02964 | 6.02892  | 1.40141  |
| H | -1.50110 | 8.09238  | 2.36169  |
| H | -2.65453 | 10.28495 | 2.28986  |
| H | -4.49664 | 10.66492 | 0.66572  |
| H | -5.14114 | 8.85553  | -0.91048 |
| H | -3.96563 | 6.68094  | -0.84558 |
| H | -4.12566 | 4.44239  | 2.95259  |
| H | -4.00987 | 6.11796  | 2.46332  |
| H | -1.34956 | 3.66182  | 3.51916  |
| H | 0.23028  | 4.08992  | 5.35463  |
| H | 0.02585  | 6.16824  | 6.71614  |
| H | -1.77587 | 7.79868  | 6.19892  |
| H | -3.33743 | 7.37000  | 4.32346  |
| H | 2.63425  | 5.34230  | -0.33375 |
| H | 2.19392  | 5.29070  | -2.76675 |

|   |          |          |          |
|---|----------|----------|----------|
| H | 0.13047  | 4.21438  | -3.61105 |
| H | 0.28903  | 4.04259  | 2.23610  |
| H | 0.77385  | 6.51613  | 1.93875  |
| H | 2.48336  | 6.11725  | 1.76761  |
| H | 1.63786  | 5.75999  | 3.28032  |
| H | 2.53332  | 3.37781  | 3.05727  |
| H | 3.23318  | 3.72624  | 1.46631  |
| H | 2.09475  | 2.39186  | 1.64921  |
| H | -2.29722 | 2.44477  | -1.44036 |
| H | -3.17490 | 4.72769  | -1.55270 |
| H | -3.86060 | 3.76773  | -2.86897 |
| H | -2.55573 | 4.92411  | -3.20000 |
| H | -0.85166 | 1.54151  | -3.34313 |
| H | -1.42345 | 2.88028  | -4.34428 |
| H | -2.57866 | 1.70357  | -3.72556 |
| H | -7.59764 | 2.69276  | 1.27073  |
| H | -7.99864 | 1.86079  | 3.56259  |
| H | -6.06839 | 1.37390  | 5.04099  |
| H | -4.23084 | 3.15841  | -0.23585 |
| H | -5.27830 | 5.28472  | 0.54726  |
| H | -6.87219 | 4.66910  | 0.08635  |
| H | -5.65413 | 4.97663  | -1.15771 |
| H | -5.80044 | 2.60057  | -2.02570 |
| H | -7.09526 | 2.29098  | -0.86764 |
| H | -5.68139 | 1.22896  | -0.90776 |
| H | -2.54227 | 2.05921  | 4.05056  |
| H | -3.69971 | 3.41134  | 5.76942  |
| H | -2.67080 | 2.16332  | 6.48694  |
| H | -4.42407 | 1.94464  | 6.45485  |
| H | -3.07867 | -0.35613 | 3.70634  |
| H | -4.11472 | -0.33219 | 5.13267  |
| H | -2.36537 | -0.09001 | 5.30010  |
| H | 2.69683  | -5.84281 | -2.20474 |
| H | 4.22283  | -5.29969 | -1.53271 |

|   |          |          |          |
|---|----------|----------|----------|
| H | 6.20581  | -5.82579 | -2.61383 |
| H | 7.41970  | -6.77978 | -4.55136 |
| H | 6.19975  | -7.27658 | -6.65851 |
| H | 3.75597  | -6.84688 | -6.79697 |
| H | 2.55199  | -5.91222 | -4.85060 |
| H | 3.68713  | -2.03819 | -3.50225 |
| H | 4.37721  | -3.46607 | -4.23690 |
| H | 6.69544  | -3.20876 | -4.13463 |
| H | 8.77654  | -2.76265 | -2.86420 |
| H | 8.65562  | -2.13094 | -0.46388 |
| H | 6.43912  | -1.94806 | 0.64876  |
| H | 4.37300  | -2.37842 | -0.63391 |
| H | 3.26043  | -7.01876 | 2.14811  |
| H | 1.71154  | -8.76720 | 1.33636  |
| H | 0.13147  | -8.24242 | -0.49670 |
| H | 3.45598  | -3.59445 | 0.69938  |
| H | 5.31821  | -5.18464 | 0.28827  |
| H | 5.13719  | -5.83909 | 1.92254  |
| H | 5.65318  | -4.16554 | 1.68845  |
| H | 3.78669  | -3.29037 | 3.14545  |
| H | 3.19653  | -4.93570 | 3.43884  |
| H | 2.10571  | -3.70686 | 2.80210  |
| H | -0.05248 | -4.91117 | -2.16418 |
| H | 1.05224  | -6.76059 | -3.42796 |
| H | -0.65578 | -6.58538 | -3.86513 |
| H | -0.13918 | -7.90116 | -2.80241 |
| H | -1.83627 | -5.45933 | -0.46117 |
| H | -1.86348 | -7.12023 | -1.05353 |
| H | -2.36053 | -5.79664 | -2.11883 |
| H | 0.20718  | -0.63378 | -5.94652 |
| H | 1.38325  | 1.53626  | -5.80772 |
| H | 2.87279  | 1.99546  | -3.88045 |
| H | 0.22010  | -3.17518 | -3.24907 |
| H | 1.97680  | -3.79191 | -4.90825 |

|   |          |          |          |
|---|----------|----------|----------|
| H | 0.94186  | -3.20549 | -6.21901 |
| H | 0.43901  | -4.60576 | -5.25465 |
| H | -1.73524 | -1.74566 | -4.05285 |
| H | -1.78214 | -3.44331 | -4.55705 |
| H | -1.30555 | -2.19397 | -5.70798 |
| H | 3.52730  | -0.46264 | -1.15998 |
| H | 5.24734  | -0.24128 | -3.01041 |
| H | 5.65960  | 0.68646  | -1.56789 |
| H | 4.99397  | 1.50922  | -2.98848 |
| H | 2.12573  | 1.53122  | -0.57383 |
| H | 3.10201  | 2.53764  | -1.62315 |
| H | 3.83381  | 1.79807  | -0.19325 |

216

TS1

|   |          |         |          |
|---|----------|---------|----------|
| C | -2.67056 | 6.50546 | 4.66870  |
| C | -2.51166 | 5.37340 | 3.86686  |
| C | -1.49558 | 4.46735 | 4.18102  |
| C | -0.65054 | 4.68734 | 5.26388  |
| C | -0.81572 | 5.82144 | 6.05834  |
| C | -1.83153 | 6.72768 | 5.75983  |
| C | -3.43824 | 5.12472 | 2.69960  |
| N | -2.73475 | 4.75411 | 1.46731  |
| C | -1.89260 | 5.83812 | 0.93615  |
| C | -2.59179 | 7.17102 | 0.90958  |
| C | -2.22657 | 8.17269 | 1.81234  |
| C | -2.86675 | 9.41034 | 1.79805  |
| C | -3.88093 | 9.65997 | 0.87606  |
| C | -4.24128 | 8.67149 | -0.03956 |
| C | -3.59588 | 7.43842 | -0.02557 |
| C | -2.34422 | 3.44281 | 1.29376  |
| N | -3.02667 | 2.40612 | 1.84147  |
| C | -4.37251 | 2.35717 | 2.24954  |
| C | -5.44434 | 2.63370 | 1.36541  |
| C | -6.75398 | 2.44892 | 1.81577  |



|    |          |          |          |
|----|----------|----------|----------|
| C  | -7.03095 | 1.97857  | 3.09309  |
| C  | -5.97577 | 1.69096  | 3.95083  |
| C  | -4.65234 | 1.87830  | 3.55395  |
| C  | -5.23252 | 3.12670  | -0.05115 |
| C  | -5.90631 | 2.21978  | -1.08667 |
| C  | -3.52697 | 1.54599  | 4.50844  |
| C  | -3.34771 | 0.02804  | 4.61535  |
| Y  | -1.57882 | 0.68924  | 1.23184  |
| N  | -1.25214 | 3.01841  | 0.64347  |
| C  | -0.32740 | 3.70037  | -0.17743 |
| C  | 0.86969  | 4.25270  | 0.33538  |
| C  | 1.78474  | 4.82939  | -0.54740 |
| C  | 1.55664  | 4.85589  | -1.91708 |
| C  | 0.39625  | 4.28230  | -2.42135 |
| C  | -0.55000 | 3.69816  | -1.57787 |
| C  | 1.20346  | 4.22317  | 1.81194  |
| C  | 2.31782  | 3.20679  | 2.08506  |
| C  | -1.82069 | 3.12586  | -2.17261 |
| C  | -1.57640 | 2.31127  | -3.44498 |
| Y  | 0.41391  | -2.06896 | 0.01296  |
| C  | -1.82526 | -2.64671 | -1.15296 |
| Al | -2.64918 | -2.08691 | 0.63445  |
| C  | -3.95563 | -3.37403 | 1.32441  |
| C  | 2.22696  | -3.36062 | -1.74367 |
| N  | 1.87067  | -2.05534 | -1.84363 |
| C  | 1.83546  | -1.23264 | -2.98827 |
| C  | 2.53066  | 0.00346  | -2.96166 |
| C  | 2.33101  | 0.92444  | -3.99129 |
| C  | 1.49216  | 0.64214  | -5.06152 |
| C  | 0.83897  | -0.58414 | -5.10410 |
| C  | 0.98168  | -1.52602 | -4.08297 |
| C  | 3.51880  | 0.33519  | -1.86226 |
| C  | 3.10511  | 1.57053  | -1.06079 |
| C  | 0.22759  | -2.83634 | -4.18015 |

|    |          |          |          |
|----|----------|----------|----------|
| C  | -1.23535 | -2.65662 | -4.59734 |
| N  | 3.15475  | -3.94757 | -2.56887 |
| C  | 4.11727  | -3.12520 | -3.29438 |
| C  | 5.40622  | -2.88699 | -2.54747 |
| C  | 6.62477  | -2.93046 | -3.22844 |
| C  | 7.81609  | -2.62864 | -2.57237 |
| C  | 7.80179  | -2.28631 | -1.22140 |
| C  | 6.59044  | -2.25319 | -0.53235 |
| C  | 5.40265  | -2.55498 | -1.19169 |
| C  | 3.59667  | -5.33485 | -2.34792 |
| C  | 4.29141  | -5.92430 | -3.54628 |
| C  | 3.56847  | -6.28856 | -4.68644 |
| C  | 4.21647  | -6.82275 | -5.79625 |
| C  | 5.59867  | -7.00913 | -5.77566 |
| C  | 6.32522  | -6.66409 | -4.63813 |
| C  | 5.67345  | -6.12479 | -3.53080 |
| N  | 1.58288  | -3.95877 | -0.72891 |
| C  | 1.72412  | -5.25552 | -0.18227 |
| C  | 2.65494  | -5.51769 | 0.84477  |
| C  | 2.71220  | -6.79784 | 1.39979  |
| C  | 1.86799  | -7.81338 | 0.97036  |
| C  | 0.93254  | -7.54113 | -0.02014 |
| C  | 0.83875  | -6.27535 | -0.59939 |
| C  | 3.55594  | -4.43709 | 1.40222  |
| C  | 3.10853  | -4.05558 | 2.81784  |
| C  | -0.22136 | -6.02169 | -1.65008 |
| C  | -1.62052 | -6.11904 | -1.03049 |
| C  | 5.03530  | -4.82753 | 1.38644  |
| C  | -0.08831 | -6.95574 | -2.85598 |
| C  | -0.40192 | -3.33672 | 1.79049  |
| C  | -1.16957 | -1.67753 | 1.95858  |
| Al | 0.42719  | -0.87185 | 2.90691  |
| C  | 0.00966  | 1.10686  | 3.27402  |
| C  | 2.05191  | -0.88188 | 1.64037  |

|   |          |          |          |
|---|----------|----------|----------|
| O | -0.71543 | -4.15279 | 2.59761  |
| C | 4.92826  | 0.53876  | -2.43218 |
| C | 0.93258  | -3.79694 | -5.14337 |
| C | 0.81770  | -1.66885 | 4.65613  |
| C | -3.66996 | -0.35244 | 0.15565  |
| C | -0.31411 | 0.29449  | -0.78993 |
| C | -5.73523 | 4.56569  | -0.20019 |
| C | -3.69456 | 2.19198  | 5.88410  |
| C | 1.59868  | 5.59185  | 2.37608  |
| C | -2.83809 | 4.24275  | -2.42852 |
| H | 0.34426  | -0.09473 | -1.57544 |
| H | -1.26046 | 0.44528  | -1.33671 |
| H | 0.09343  | 1.30721  | -0.65333 |
| H | -1.72172 | -1.95142 | 2.86729  |
| H | -4.30966 | 0.08950  | 0.93197  |
| H | -3.36770 | 0.46252  | -0.52365 |
| H | -4.36583 | -0.93279 | -0.46576 |
| H | -2.75698 | -2.94552 | -1.64824 |
| H | -1.41522 | -1.86752 | -1.81100 |
| H | -1.20380 | -3.54755 | -1.24930 |
| H | -4.59437 | -2.92292 | 2.09484  |
| H | -3.44989 | -4.22907 | 1.78663  |
| H | -4.62113 | -3.76632 | 0.54501  |
| H | 2.74139  | -0.38916 | 2.33760  |
| H | 2.08092  | -0.23506 | 0.75047  |
| H | 2.57557  | -1.81963 | 1.39880  |
| H | -0.76181 | 1.16053  | 4.05231  |
| H | 0.95599  | 1.29541  | 3.79549  |
| H | -0.08916 | 2.00164  | 2.64299  |
| H | 1.83823  | -1.45602 | 4.99878  |
| H | 0.69796  | -2.75691 | 4.63873  |
| H | 0.13440  | -1.28459 | 5.42473  |
| H | -1.58767 | 5.57403  | -0.07375 |
| H | -0.98374 | 5.92647  | 1.53817  |

|   |          |          |          |
|---|----------|----------|----------|
| H | -1.44507 | 7.97223  | 2.53955  |
| H | -2.57298 | 10.17845 | 2.50770  |
| H | -4.38345 | 10.62278 | 0.86457  |
| H | -5.02153 | 8.86390  | -0.77029 |
| H | -3.87065 | 6.67556  | -0.74584 |
| H | -4.15628 | 4.34655  | 2.95201  |
| H | -4.01681 | 6.02738  | 2.49084  |
| H | -1.37133 | 3.57553  | 3.57933  |
| H | 0.13279  | 3.96829  | 5.48621  |
| H | -0.15817 | 5.99710  | 6.90464  |
| H | -1.96684 | 7.61469  | 6.37218  |
| H | -3.44911 | 7.22393  | 4.42556  |
| H | 2.69949  | 5.25960  | -0.14946 |
| H | 2.28137  | 5.31022  | -2.58641 |
| H | 0.21885  | 4.28485  | -3.49242 |
| H | 0.30387  | 3.90309  | 2.34218  |
| H | 0.85799  | 6.36200  | 2.14445  |
| H | 2.56056  | 5.92896  | 1.97606  |
| H | 1.69036  | 5.53598  | 3.46500  |
| H | 2.52471  | 3.13454  | 3.15846  |
| H | 3.24165  | 3.50999  | 1.58161  |
| H | 2.05463  | 2.21303  | 1.71613  |
| H | -2.25364 | 2.45824  | -1.41969 |
| H | -3.09569 | 4.75897  | -1.50081 |
| H | -3.76225 | 3.83986  | -2.85573 |
| H | -2.43246 | 4.98248  | -3.12710 |
| H | -0.77444 | 1.58196  | -3.30994 |
| H | -1.30567 | 2.95287  | -4.29032 |
| H | -2.48916 | 1.77601  | -3.72844 |
| H | -7.57591 | 2.66851  | 1.13983  |
| H | -8.05800 | 1.83472  | 3.41522  |
| H | -6.18056 | 1.31798  | 4.95047  |
| H | -4.15903 | 3.11681  | -0.25548 |
| H | -5.23664 | 5.23396  | 0.50414  |

|   |          |          |          |
|---|----------|----------|----------|
| H | -6.81312 | 4.61998  | -0.01350 |
| H | -5.55548 | 4.93712  | -1.21465 |
| H | -5.66214 | 2.55524  | -2.10029 |
| H | -6.99662 | 2.24190  | -0.98856 |
| H | -5.58123 | 1.18291  | -0.97906 |
| H | -2.62002 | 1.96546  | 4.06812  |
| H | -3.80732 | 3.27599  | 5.79436  |
| H | -2.81312 | 1.99559  | 6.50342  |
| H | -4.56654 | 1.79866  | 6.41730  |
| H | -3.22227 | -0.43421 | 3.62924  |
| H | -4.22787 | -0.43849 | 5.07051  |
| H | -2.47259 | -0.23238 | 5.22047  |
| H | 2.72582  | -5.93822 | -2.10537 |
| H | 4.26829  | -5.38123 | -1.48367 |
| H | 6.24090  | -5.84081 | -2.64939 |
| H | 7.40097  | -6.81213 | -4.61178 |
| H | 6.10503  | -7.42757 | -6.64067 |
| H | 3.64202  | -7.09965 | -6.67556 |
| H | 2.49311  | -6.14543 | -4.70361 |
| H | 3.65426  | -2.17017 | -3.53933 |
| H | 4.33298  | -3.61633 | -4.24657 |
| H | 6.63622  | -3.21010 | -4.27875 |
| H | 8.75626  | -2.66599 | -3.11527 |
| H | 8.72910  | -2.05080 | -0.70747 |
| H | 6.56889  | -1.98914 | 0.52081  |
| H | 4.46091  | -2.51573 | -0.65558 |
| H | 3.42841  | -6.99807 | 2.19197  |
| H | 1.92887  | -8.80320 | 1.41299  |
| H | 0.25508  | -8.32473 | -0.34882 |
| H | 3.43706  | -3.55877 | 0.75980  |
| H | 5.38748  | -5.04664 | 0.37479  |
| H | 5.21988  | -5.70996 | 2.00733  |
| H | 5.65018  | -4.01297 | 1.78199  |
| H | 3.68377  | -3.20416 | 3.19794  |

|      |          |          |          |
|------|----------|----------|----------|
| H    | 3.25259  | -4.89497 | 3.50615  |
| H    | 2.04834  | -3.79686 | 2.83959  |
| H    | -0.07351 | -5.00060 | -2.01356 |
| H    | 0.90829  | -6.89322 | -3.30245 |
| H    | -0.82386 | -6.69671 | -3.62533 |
| H    | -0.25721 | -8.00055 | -2.57477 |
| H    | -1.71127 | -5.47417 | -0.15235 |
| H    | -1.82842 | -7.14410 | -0.70565 |
| H    | -2.39096 | -5.83276 | -1.75494 |
| H    | 0.18500  | -0.81087 | -5.94127 |
| H    | 1.34803  | 1.36869  | -5.85576 |
| H    | 2.84833  | 1.87892  | -3.94996 |
| H    | 0.23252  | -3.29470 | -3.18698 |
| H    | 1.96917  | -3.95859 | -4.84601 |
| H    | 0.92872  | -3.39113 | -6.16112 |
| H    | 0.42411  | -4.76739 | -5.16346 |
| H    | -1.73455 | -1.88792 | -4.00252 |
| H    | -1.78122 | -3.59690 | -4.46812 |
| H    | -1.32044 | -2.37216 | -5.65144 |
| H    | 3.54345  | -0.52450 | -1.18627 |
| H    | 5.24768  | -0.30699 | -3.04431 |
| H    | 5.65477  | 0.65278  | -1.62138 |
| H    | 4.97077  | 1.44071  | -3.05272 |
| H    | 2.11162  | 1.46439  | -0.62287 |
| H    | 3.07469  | 2.46468  | -1.68976 |
| H    | 3.81722  | 1.75656  | -0.25032 |
| 216  |          |          |          |
| Int2 |          |          |          |
| C    | 3.16697  | 0.24593  | -2.39872 |
| C    | 2.28837  | -0.83375 | -2.66848 |
| C    | 1.54943  | -0.84583 | -3.87523 |
| C    | 1.72473  | 0.20016  | -4.78578 |
| C    | 2.59617  | 1.25042  | -4.53327 |
| C    | 3.30564  | 1.26750  | -3.33919 |

|    |          |          |          |
|----|----------|----------|----------|
| N  | 2.11334  | -1.80076 | -1.65097 |
| C  | 2.45900  | -3.09828 | -1.64751 |
| N  | 3.21708  | -3.72506 | -2.60251 |
| C  | 4.10040  | -3.02869 | -3.51515 |
| C  | 5.55357  | -3.42478 | -3.37211 |
| C  | 6.46957  | -2.95934 | -4.32122 |
| C  | 7.82078  | -3.27273 | -4.21609 |
| C  | 8.27429  | -4.06980 | -3.16432 |
| C  | 7.36631  | -4.54107 | -2.22049 |
| C  | 6.01354  | -4.21591 | -2.31919 |
| C  | 0.58717  | -1.95721 | -4.23688 |
| C  | -0.86498 | -1.46822 | -4.30132 |
| C  | 4.01801  | 0.28007  | -1.14598 |
| C  | 3.96956  | 1.63925  | -0.44520 |
| Y  | 0.57511  | -2.03840 | 0.14641  |
| C  | 1.46476  | 0.35248  | 1.51321  |
| Al | 0.44912  | -0.50464 | 3.09628  |
| C  | 1.57037  | -1.16607 | 4.54648  |
| Y  | -1.48883 | 0.56046  | 1.25179  |
| C  | -0.75156 | 1.02117  | 3.75414  |
| Al | -2.38332 | -2.41641 | 0.94906  |
| C  | -3.47071 | -3.81542 | 1.78252  |
| N  | -1.11724 | 2.89533  | 0.84874  |
| C  | -0.01238 | 3.63889  | 0.37577  |
| C  | 0.95644  | 4.18029  | 1.25336  |
| C  | 2.12245  | 4.72979  | 0.71349  |
| C  | 2.33876  | 4.77588  | -0.65738 |
| C  | 1.36321  | 4.28527  | -1.51669 |
| C  | 0.18320  | 3.72177  | -1.02838 |
| C  | 0.74564  | 4.25070  | 2.75318  |
| C  | 1.71847  | 3.35023  | 3.51869  |
| C  | -0.89969 | 3.30494  | -2.00648 |
| C  | -0.36487 | 2.52613  | -3.20864 |
| N  | -3.14577 | 2.18220  | 1.41901  |

|   |          |          |          |
|---|----------|----------|----------|
| C | -4.54966 | 2.08416  | 1.37657  |
| C | -5.28807 | 2.36422  | 0.20003  |
| C | -6.64742 | 2.04271  | 0.17365  |
| C | -7.28790 | 1.46263  | 1.26263  |
| C | -6.56325 | 1.21467  | 2.42081  |
| C | -5.20479 | 1.52237  | 2.49916  |
| C | -4.65137 | 2.94871  | -1.04996 |
| C | -4.26147 | 1.85977  | -2.05652 |
| C | -4.45594 | 1.25936  | 3.78913  |
| C | -4.32002 | -0.23804 | 4.08308  |
| C | -0.55323 | 0.04896  | -0.89371 |
| C | -0.92205 | -1.77562 | 2.24990  |
| C | -3.60864 | -0.89069 | 0.39338  |
| N | 1.94049  | -3.77694 | -0.59636 |
| C | 2.66935  | -4.78899 | 0.07258  |
| C | 3.95308  | -4.50289 | 0.61101  |
| C | 4.67137  | -5.52751 | 1.22754  |
| C | 4.13143  | -6.80172 | 1.37847  |
| C | 2.84181  | -7.04811 | 0.93190  |
| C | 2.09699  | -6.06239 | 0.27810  |
| C | 4.46213  | -3.07222 | 0.66379  |
| C | 3.68883  | -2.32287 | 1.75505  |
| C | 0.69006  | -6.38030 | -0.17677 |
| C | -0.24840 | -6.53936 | 1.02423  |
| C | -1.53433 | -3.18641 | -0.76521 |
| C | -2.36540 | 3.25988  | 1.16831  |
| N | -2.84134 | 4.54656  | 1.28859  |
| C | -3.84588 | 4.84392  | 2.32269  |
| C | -3.19535 | 5.26618  | 3.61818  |
| C | -2.48413 | 4.33497  | 4.38082  |
| C | -1.84402 | 4.71557  | 5.55550  |
| C | -1.90628 | 6.04219  | 5.98404  |
| C | -2.61131 | 6.97837  | 5.23062  |
| C | -3.25181 | 6.59126  | 4.05382  |



|   |          |          |          |
|---|----------|----------|----------|
| C | -1.99253 | 5.69708  | 0.99266  |
| C | -2.77903 | 6.90386  | 0.55336  |
| C | -2.43235 | 8.16973  | 1.02885  |
| C | -3.12107 | 9.30158  | 0.59625  |
| C | -4.17215 | 9.17646  | -0.31031 |
| C | -4.52821 | 7.91382  | -0.78345 |
| C | -3.83331 | 6.78714  | -0.35453 |
| C | 3.03624  | -5.15037 | -2.89205 |
| C | 1.90974  | -5.44782 | -3.85120 |
| C | 2.17113  | -6.01024 | -5.10152 |
| C | 1.12779  | -6.35204 | -5.96235 |
| C | -0.19298 | -6.13543 | -5.57767 |
| C | -0.46459 | -5.56279 | -4.33375 |
| C | 0.57929  | -5.22050 | -3.48218 |
| C | 0.87542  | 5.68526  | 3.28337  |
| C | -1.68109 | 4.53310  | -2.49253 |
| C | -5.55935 | 3.97468  | -1.73843 |
| C | -5.08561 | 1.99763  | 4.97394  |
| C | 5.95842  | -2.92542 | 0.93231  |
| C | 0.62668  | -7.60597 | -1.09211 |
| C | 0.96766  | -2.61306 | -5.56740 |
| C | 5.46531  | -0.11861 | -1.46130 |
| H | -1.54346 | 0.21606  | -1.34806 |
| H | -0.06947 | 1.03770  | -0.84139 |
| H | 0.00773  | -0.42874 | -1.70404 |
| H | -1.56962 | -1.91988 | 3.13469  |
| H | -4.42396 | -0.76321 | 1.11302  |
| H | -3.48221 | 0.09321  | -0.07387 |
| H | -4.03934 | -1.47011 | -0.43756 |
| H | -2.50192 | -3.48842 | -1.18666 |
| H | -1.08102 | -2.62479 | -1.60004 |
| H | -0.98645 | -4.12899 | -0.63848 |
| H | -4.23742 | -4.22277 | 1.11128  |
| H | -3.98835 | -3.44544 | 2.67646  |

|   |          |          |          |
|---|----------|----------|----------|
| H | -2.83484 | -4.64796 | 2.10464  |
| H | 2.33912  | 0.61405  | 2.12570  |
| H | 1.11108  | 1.32360  | 1.14141  |
| H | 1.94212  | -0.10001 | 0.63221  |
| H | -1.63718 | 0.63137  | 4.26951  |
| H | -0.07416 | 1.36696  | 4.54383  |
| H | -1.02937 | 1.95816  | 3.25232  |
| H | 2.27180  | -0.40129 | 4.90410  |
| H | 2.14638  | -2.04786 | 4.25348  |
| H | 0.94803  | -1.46845 | 5.39767  |
| H | -1.29130 | 5.42390  | 0.20680  |
| H | -1.39903 | 5.96035  | 1.87284  |
| H | -1.62447 | 8.26545  | 1.74992  |
| H | -2.84163 | 10.28080 | 0.97436  |
| H | -4.71399 | 10.05709 | -0.64246 |
| H | -5.34918 | 7.80510  | -1.48653 |
| H | -4.11482 | 5.80208  | -0.70663 |
| H | -4.47486 | 3.96945  | 2.47089  |
| H | -4.48866 | 5.64309  | 1.94617  |
| H | -2.43650 | 3.30303  | 4.05164  |
| H | -1.29872 | 3.97647  | 6.13542  |
| H | -1.40805 | 6.34313  | 6.90099  |
| H | -2.66210 | 8.01304  | 5.55743  |
| H | -3.79184 | 7.32369  | 3.45989  |
| H | 2.87171  | 5.13712  | 1.38662  |
| H | 3.25687  | 5.19922  | -1.05369 |
| H | 1.51779  | 4.33646  | -2.59002 |
| H | -0.27365 | 3.91200  | 2.95895  |
| H | 0.28495  | 6.39748  | 2.70238  |
| H | 1.91630  | 6.02428  | 3.25327  |
| H | 0.53342  | 5.73443  | 4.32088  |
| H | 1.52813  | 3.40718  | 4.59582  |
| H | 2.75363  | 3.66275  | 3.34366  |
| H | 1.63003  | 2.30985  | 3.21038  |

|   |          |          |          |
|---|----------|----------|----------|
| H | -1.59564 | 2.65890  | -1.46448 |
| H | -2.16303 | 5.07177  | -1.67457 |
| H | -2.46102 | 4.23553  | -3.20146 |
| H | -1.01397 | 5.23637  | -3.00244 |
| H | 0.29349  | 1.71013  | -2.91119 |
| H | 0.19716  | 3.17238  | -3.89073 |
| H | -1.19642 | 2.09938  | -3.77910 |
| H | -7.21722 | 2.23873  | -0.72938 |
| H | -8.34340 | 1.21319  | 1.20841  |
| H | -7.05726 | 0.77420  | 3.28273  |
| H | -3.73902 | 3.47064  | -0.75471 |
| H | -5.97111 | 4.69301  | -1.02357 |
| H | -6.40099 | 3.49310  | -2.24670 |
| H | -4.99748 | 4.52353  | -2.50125 |
| H | -3.86881 | 2.30750  | -2.97530 |
| H | -5.12884 | 1.24419  | -2.31700 |
| H | -3.48990 | 1.19594  | -1.66212 |
| H | -3.45031 | 1.66222  | 3.64978  |
| H | -5.16707 | 3.06994  | 4.77480  |
| H | -4.47343 | 1.86881  | 5.87278  |
| H | -6.08844 | 1.61814  | 5.19649  |
| H | -3.78997 | -0.76452 | 3.28346  |
| H | -5.30182 | -0.71255 | 4.18378  |
| H | -3.77007 | -0.40493 | 5.01567  |
| H | 2.88591  | -5.69199 | -1.95797 |
| H | 3.97765  | -5.51368 | -3.31112 |
| H | 3.20131  | -6.19259 | -5.39871 |
| H | 1.34837  | -6.79110 | -6.93103 |
| H | -1.00707 | -6.40860 | -6.24270 |
| H | -1.49075 | -5.38701 | -4.02373 |
| H | 0.36880  | -4.78357 | -2.51308 |
| H | 4.00759  | -1.95550 | -3.35817 |
| H | 3.77722  | -3.21030 | -4.54861 |
| H | 6.11792  | -2.34241 | -5.14550 |

|   |          |          |          |
|---|----------|----------|----------|
| H | 8.52101  | -2.89925 | -4.95793 |
| H | 9.32765  | -4.32202 | -3.08500 |
| H | 7.70562  | -5.16584 | -1.39894 |
| H | 5.31440  | -4.57689 | -1.57117 |
| H | 5.66028  | -5.32089 | 1.62290  |
| H | 4.70461  | -7.58460 | 1.86662  |
| H | 2.39728  | -8.02774 | 1.08371  |
| H | 4.26040  | -2.58430 | -0.29459 |
| H | 6.56476  | -3.44150 | 0.18524  |
| H | 6.22826  | -3.30372 | 1.92383  |
| H | 6.23156  | -1.86677 | 0.90645  |
| H | 3.88625  | -1.24723 | 1.72420  |
| H | 3.97771  | -2.69484 | 2.74307  |
| H | 2.60650  | -2.50293 | 1.69738  |
| H | 0.35296  | -5.51530 | -0.75125 |
| H | 1.29303  | -7.50817 | -1.95337 |
| H | -0.39094 | -7.74321 | -1.47270 |
| H | 0.90294  | -8.51816 | -0.55239 |
| H | -0.18684 | -5.67935 | 1.69454  |
| H | 0.01591  | -7.43102 | 1.60419  |
| H | -1.28514 | -6.65626 | 0.68770  |
| H | 1.15556  | 0.18990  | -5.71094 |
| H | 2.71355  | 2.05294  | -5.25557 |
| H | 3.98656  | 2.08714  | -3.12991 |
| H | 0.64912  | -2.72306 | -3.46049 |
| H | 1.99147  | -2.99042 | -5.55097 |
| H | 0.88568  | -1.90026 | -6.39453 |
| H | 0.30754  | -3.45635 | -5.78064 |
| H | -1.18250 | -0.99625 | -3.36896 |
| H | -1.53549 | -2.30914 | -4.50863 |
| H | -0.99350 | -0.73110 | -5.10138 |
| H | 3.61477  | -0.47375 | -0.46452 |
| H | 5.53790  | -1.14132 | -1.84089 |
| H | 6.08644  | -0.05315 | -0.56211 |

|     |          |          |          |
|-----|----------|----------|----------|
| H   | 5.89511  | 0.54954  | -2.21558 |
| H   | 2.94443  | 1.98621  | -0.30220 |
| H   | 4.49805  | 2.40798  | -1.01842 |
| H   | 4.45212  | 1.57828  | 0.53611  |
| C   | 0.07007  | -3.00626 | 2.22800  |
| O   | 0.05561  | -3.85780 | 3.10266  |
| 216 |          |          |          |
| TS2 |          |          |          |
| C   | 4.86601  | 7.22560  | 0.92021  |
| C   | 3.98891  | 6.12107  | 0.76625  |
| C   | 3.22318  | 5.99888  | -0.41672 |
| C   | 3.34697  | 6.97857  | -1.40626 |
| C   | 4.21429  | 8.05287  | -1.26662 |
| C   | 4.97112  | 8.16383  | -0.10694 |
| N   | 3.83759  | 5.24777  | 1.86930  |
| C   | 4.24618  | 3.97920  | 2.01506  |
| N   | 5.02150  | 3.27258  | 1.13081  |
| C   | 5.83189  | 3.89045  | 0.10126  |
| C   | 7.29960  | 3.53446  | 0.18544  |
| C   | 8.13917  | 3.92555  | -0.86283 |
| C   | 9.50130  | 3.64677  | -0.82294 |
| C   | 10.04257 | 2.95820  | 0.26331  |
| C   | 9.21106  | 2.56086  | 1.30627  |
| C   | 7.84749  | 2.85237  | 1.27194  |
| C   | 2.29558  | 4.83136  | -0.67585 |
| C   | 0.82924  | 5.26643  | -0.77199 |
| C   | 5.74028  | 7.38100  | 2.14754  |
| C   | 5.66453  | 8.79068  | 2.74173  |
| Y   | 2.28912  | 5.10376  | 3.68584  |
| C   | 3.10544  | 7.53438  | 4.65435  |
| Al  | 2.54801  | 6.59394  | 6.42218  |
| C   | 4.00226  | 6.51880  | 7.73550  |
| Y   | 0.32391  | 7.65469  | 4.74828  |
| C   | 1.10234  | 7.74830  | 7.31620  |

|    |          |          |         |
|----|----------|----------|---------|
| Al | -0.68332 | 4.62791  | 4.23501 |
| C  | -1.78424 | 3.18104  | 4.97854 |
| N  | 0.76080  | 9.99419  | 4.53709 |
| C  | 1.88778  | 10.79497 | 4.23070 |
| C  | 2.78709  | 11.24212 | 5.22471 |
| C  | 3.94513  | 11.91875 | 4.82972 |
| C  | 4.22733  | 12.16843 | 3.49399 |
| C  | 3.33404  | 11.73613 | 2.52188 |
| C  | 2.16904  | 11.04851 | 2.86323 |
| C  | 2.55247  | 11.02782 | 6.70681 |
| C  | 3.65717  | 10.16010 | 7.31883 |
| C  | 1.21107  | 10.64360 | 1.76045 |
| C  | 1.90739  | 9.84714  | 0.65400 |
| N  | -1.30220 | 9.28518  | 5.00796 |
| C  | -2.70582 | 9.24633  | 4.88087 |
| C  | -3.36091 | 9.63526  | 3.68560 |
| C  | -4.73270 | 9.39810  | 3.57109 |
| C  | -5.46077 | 8.78908  | 4.58733 |
| C  | -4.81404 | 8.42321  | 5.75987 |
| C  | -3.44781 | 8.65043  | 5.92831 |
| C  | -2.61213 | 10.22822 | 2.50318 |
| C  | -2.10020 | 9.13436  | 1.55936 |
| C  | -2.78200 | 8.26052  | 7.23122 |
| C  | -2.66700 | 6.74127  | 7.38220 |
| C  | 0.99861  | 6.99964  | 2.50064 |
| C  | 0.68291  | 5.28287  | 5.60711 |
| C  | -1.90319 | 6.17154  | 3.75394 |
| N  | 3.77179  | 3.40317  | 3.14763 |
| C  | 4.52858  | 2.47684  | 3.89956 |
| C  | 5.84331  | 2.79806  | 4.33386 |
| C  | 6.56821  | 1.83810  | 5.04046 |
| C  | 6.01103  | 0.60756  | 5.37843 |
| C  | 4.69624  | 0.33920  | 5.02844 |
| C  | 3.94130  | 1.25500  | 4.29067 |

|   |          |          |          |
|---|----------|----------|----------|
| C | 6.39108  | 4.20780  | 4.17921  |
| C | 5.67612  | 5.12297  | 5.17742  |
| C | 2.50685  | 0.92559  | 3.94146  |
| C | 1.62178  | 0.93156  | 5.19223  |
| C | 0.26108  | 3.82785  | 2.58991  |
| C | -0.48714 | 10.35915 | 4.86008  |
| N | -0.94033 | 11.64126 | 5.06151  |
| C | -1.96046 | 11.88650 | 6.08945  |
| C | -1.35130 | 12.16119 | 7.44277  |
| C | -0.71398 | 11.13605 | 8.14889  |
| C | -0.16809 | 11.36977 | 9.40598  |
| C | -0.23938 | 12.64367 | 9.97074  |
| C | -0.85560 | 13.67657 | 9.26823  |
| C | -1.41083 | 13.43464 | 8.01152  |
| C | -0.10736 | 12.80965 | 4.78334  |
| C | -0.92217 | 14.02441 | 4.42608  |
| C | -0.66727 | 15.24798 | 5.04676  |
| C | -1.39254 | 16.38534 | 4.69370  |
| C | -2.38629 | 16.30596 | 3.72044  |
| C | -2.64822 | 15.08481 | 3.09865  |
| C | -1.91804 | 13.95394 | 3.44925  |
| C | 4.86496  | 1.82042  | 0.99130  |
| C | 3.74928  | 1.41493  | 0.06065  |
| C | 4.02356  | 0.78980  | -1.15678 |
| C | 2.98669  | 0.36191  | -1.98633 |
| C | 1.66150  | 0.55718  | -1.60427 |
| C | 1.37731  | 1.19283  | -0.39419 |
| C | 2.41487  | 1.61705  | 0.42784  |
| C | 2.46608  | 12.34773 | 7.48262  |
| C | 0.49679  | 11.86468 | 1.16722  |
| C | -3.45368 | 11.23153 | 1.70743  |
| C | -3.46861 | 8.89022  | 8.44555  |
| C | 7.89860  | 4.33876  | 4.39098  |
| C | 2.37609  | -0.39580 | 3.17950  |

|   |          |          |          |
|---|----------|----------|----------|
| C | 2.69016  | 4.07603  | -1.94842 |
| C | 7.19410  | 7.00441  | 1.83581  |
| H | 0.08703  | 6.66404  | 1.99491  |
| H | 0.98078  | 8.10285  | 2.44284  |
| H | 1.82020  | 6.78113  | 1.80446  |
| H | -0.07014 | 5.19618  | 6.41286  |
| H | -2.80125 | 6.07439  | 4.37408  |
| H | -1.79609 | 7.25475  | 3.61801  |
| H | -2.19309 | 5.84623  | 2.74302  |
| H | -0.66176 | 3.82147  | 1.99191  |
| H | 0.99459  | 4.17903  | 1.84705  |
| H | 0.48389  | 2.77470  | 2.79706  |
| H | -2.46437 | 2.74254  | 4.23624  |
| H | -2.40587 | 3.53930  | 5.80890  |
| H | -1.16152 | 2.37010  | 5.37260  |
| H | 3.98624  | 7.90031  | 5.19972  |
| H | 2.65483  | 8.46496  | 4.28632  |
| H | 3.57164  | 7.10391  | 3.75656  |
| H | 0.91769  | 7.02262  | 8.12267  |
| H | 1.61185  | 8.60052  | 7.77178  |
| H | 0.08881  | 8.11010  | 7.08214  |
| H | 4.92797  | 6.99463  | 7.39239  |
| H | 4.22235  | 5.47067  | 7.96057  |
| H | 3.71175  | 7.00464  | 8.67469  |
| H | 0.55653  | 12.57270 | 3.95527  |
| H | 0.53097  | 13.04338 | 5.64030  |
| H | 0.09922  | 15.30558 | 5.81539  |
| H | -1.18516 | 17.33191 | 5.18450  |
| H | -2.95593 | 17.18986 | 3.44903  |
| H | -3.42183 | 15.01322 | 2.33936  |
| H | -2.12656 | 12.99995 | 2.97990  |
| H | -2.62880 | 11.02995 | 6.13834  |
| H | -2.56059 | 12.74019 | 5.76671  |
| H | -0.64992 | 10.14706 | 7.70952  |



|   |          |          |          |
|---|----------|----------|----------|
| H | 0.31490  | 10.55826 | 9.94280  |
| H | 0.18697  | 12.82966 | 10.95214 |
| H | -0.90924 | 14.67207 | 9.69962  |
| H | -1.89530 | 14.23875 | 7.46385  |
| H | 4.63935  | 12.25913 | 5.59306  |
| H | 5.13439  | 12.69524 | 3.21303  |
| H | 3.54287  | 11.93160 | 1.47404  |
| H | 1.59771  | 10.50709 | 6.81833  |
| H | 1.59587  | 12.94306 | 7.19797  |
| H | 3.36194  | 12.95752 | 7.32718  |
| H | 2.37560  | 12.14868 | 8.55339  |
| H | 3.44653  | 9.94774  | 8.37213  |
| H | 4.62612  | 10.66800 | 7.27184  |
| H | 3.76032  | 9.20631  | 6.80126  |
| H | 0.44629  | 10.00775 | 2.21393  |
| H | -0.07514 | 12.41616 | 1.91800  |
| H | -0.19698 | 11.55586 | 0.37805  |
| H | 1.21739  | 12.56115 | 0.72540  |
| H | 2.50640  | 9.02658  | 1.05273  |
| H | 2.57829  | 10.48177 | 0.06623  |
| H | 1.17137  | 9.42142  | -0.03517 |
| H | -5.24301 | 9.68238  | 2.65653  |
| H | -6.52417 | 8.60632  | 4.46439  |
| H | -5.37636 | 7.95536  | 6.56337  |
| H | -1.74346 | 10.76797 | 2.88836  |
| H | -3.95733 | 11.94896 | 2.36203  |
| H | -4.22155 | 10.72999 | 1.10937  |
| H | -2.81663 | 11.78423 | 1.00943  |
| H | -1.60232 | 9.57552  | 0.68967  |
| H | -2.92942 | 8.51357  | 1.20433  |
| H | -1.38051 | 8.47628  | 2.04752  |
| H | -1.76811 | 8.66412  | 7.18966  |
| H | -3.52836 | 9.97778  | 8.34581  |
| H | -2.90605 | 8.66689  | 9.35796  |

|   |          |          |          |
|---|----------|----------|----------|
| H | -4.48516 | 8.50578  | 8.57942  |
| H | -2.12861 | 6.29271  | 6.54217  |
| H | -3.65602 | 6.27173  | 7.41293  |
| H | -2.13629 | 6.47832  | 8.30319  |
| H | 4.71402  | 1.37833  | 1.97591  |
| H | 5.81380  | 1.42968  | 0.61650  |
| H | 5.05775  | 0.62620  | -1.45098 |
| H | 3.21544  | -0.12651 | -2.92914 |
| H | 0.85332  | 0.21819  | -2.24582 |
| H | 0.34803  | 1.35305  | -0.08622 |
| H | 2.19778  | 2.09905  | 1.37354  |
| H | 5.72644  | 4.97207  | 0.16102  |
| H | 5.45136  | 3.60492  | -0.88817 |
| H | 7.71850  | 4.45694  | -1.71393 |
| H | 10.14132 | 3.96210  | -1.64211 |
| H | 11.10442 | 2.73228  | 0.29281  |
| H | 9.62020  | 2.02052  | 2.15541  |
| H | 7.20747  | 2.54998  | 2.09500  |
| H | 7.57921  | 2.06578  | 5.36091  |
| H | 6.59265  | -0.12113 | 5.93551  |
| H | 4.24046  | -0.60163 | 5.32443  |
| H | 6.17594  | 4.56690  | 3.16792  |
| H | 8.47207  | 3.68893  | 3.72740  |
| H | 8.17731  | 4.11284  | 5.42559  |
| H | 8.20698  | 5.36856  | 4.19095  |
| H | 5.93172  | 6.17461  | 5.01165  |
| H | 5.95764  | 4.85920  | 6.20059  |
| H | 4.58705  | 5.00968  | 5.13629  |
| H | 2.15965  | 1.72696  | 3.28514  |
| H | 3.00365  | -0.41107 | 2.28421  |
| H | 1.33908  | -0.55265 | 2.86386  |
| H | 2.66194  | -1.24623 | 3.80775  |
| H | 1.69745  | 1.87559  | 5.73744  |
| H | 1.91814  | 0.13199  | 5.88038  |

|      |         |          |          |
|------|---------|----------|----------|
| H    | 0.57376 | 0.76586  | 4.91944  |
| H    | 2.75186 | 6.88687  | -2.31059 |
| H    | 4.29775 | 8.79793  | -2.05237 |
| H    | 5.65349 | 9.00044  | 0.01172  |
| H    | 2.38962 | 4.13463  | 0.16066  |
| H    | 3.72412 | 3.72969  | -1.90878 |
| H    | 2.58342 | 4.71314  | -2.83261 |
| H    | 2.05309 | 3.19929  | -2.08265 |
| H    | 0.51232 | 5.82324  | 0.11138  |
| H    | 0.18288 | 4.38906  | -0.88127 |
| H    | 0.67038 | 5.91030  | -1.64396 |
| H    | 5.37308 | 6.67125  | 2.89313  |
| H    | 7.29236 | 5.96172  | 1.52189  |
| H    | 7.82433 | 7.14680  | 2.71972  |
| H    | 7.59459 | 7.63383  | 1.03362  |
| H    | 4.63348 | 9.12185  | 2.88392  |
| H    | 6.15806 | 9.52640  | 2.09802  |
| H    | 6.16934 | 8.82202  | 3.71320  |
| C    | 1.91584 | 4.60928  | 6.02572  |
| O    | 2.05745 | 3.92876  | 7.05822  |
| 216  |         |          |          |
| Int3 |         |          |          |
| C    | 2.98532 | 0.03356  | -2.79211 |
| C    | 2.06109 | -1.02943 | -2.95594 |
| C    | 1.29625 | -1.12135 | -4.13917 |
| C    | 1.50679 | -0.18172 | -5.15255 |
| C    | 2.44805 | 0.83001  | -5.02164 |
| C    | 3.17674 | 0.93143  | -3.84251 |
| N    | 1.85576 | -1.90316 | -1.86494 |
| C    | 2.31307 | -3.14893 | -1.67707 |
| N    | 3.15961 | -3.83890 | -2.50868 |
| C    | 3.84527 | -3.22013 | -3.63487 |
| C    | 5.25280 | -3.73057 | -3.80860 |
| C    | 5.78598 | -3.87676 | -5.09044 |

|    |          |          |          |
|----|----------|----------|----------|
| C  | 7.10613  | -4.28824 | -5.26485 |
| C  | 7.90349  | -4.56739 | -4.15641 |
| C  | 7.37282  | -4.43363 | -2.87381 |
| C  | 6.05604  | -4.01751 | -2.70270 |
| C  | 0.23549  | -2.18378 | -4.34691 |
| C  | -1.15862 | -1.54540 | -4.41329 |
| C  | 3.79814  | 0.18325  | -1.52129 |
| C  | 3.86305  | 1.63148  | -1.02911 |
| Y  | 0.10366  | -2.16092 | -0.28716 |
| C  | 1.67917  | 1.02920  | 1.51290  |
| Al | 1.24970  | 0.17136  | 3.32430  |
| C  | 2.73536  | 0.42016  | 4.57677  |
| Y  | -0.95669 | 0.74168  | 1.39300  |
| C  | -0.58989 | 0.88964  | 3.94645  |
| Al | -2.74042 | -2.66045 | 0.64354  |
| C  | -3.80470 | -4.08179 | 1.50051  |
| N  | -0.84162 | 3.07155  | 1.07675  |
| C  | 0.23236  | 3.95506  | 0.81868  |
| C  | 0.98954  | 4.54966  | 1.85362  |
| C  | 2.17162  | 5.21680  | 1.52195  |
| C  | 2.59383  | 5.33971  | 0.20377  |
| C  | 1.80224  | 4.82086  | -0.81405 |
| C  | 0.62159  | 4.13216  | -0.53177 |
| C  | 0.53644  | 4.53659  | 3.29961  |
| C  | 1.42801  | 3.66421  | 4.18235  |
| C  | -0.26100 | 3.66581  | -1.67378 |
| C  | 0.49439  | 2.83708  | -2.71252 |
| N  | -2.83608 | 2.14173  | 1.42235  |
| C  | -4.23290 | 1.98569  | 1.27673  |
| C  | -4.90714 | 2.33975  | 0.08036  |
| C  | -6.26240 | 2.02602  | -0.03915 |
| C  | -6.96033 | 1.37662  | 0.97228  |
| C  | -6.29604 | 1.04111  | 2.14306  |
| C  | -4.94446 | 1.34105  | 2.31528  |

|   |          |          |          |
|---|----------|----------|----------|
| C | -4.19929 | 2.96956  | -1.10714 |
| C | -3.69795 | 1.89466  | -2.07641 |
| C | -4.26300 | 0.95077  | 3.60806  |
| C | -4.05881 | -0.56507 | 3.68360  |
| C | -0.71676 | 0.07216  | -0.97777 |
| C | -1.21451 | -2.18616 | 1.93162  |
| C | -3.81343 | -1.09829 | 0.04261  |
| N | 1.79458  | -3.71821 | -0.55881 |
| C | 2.46088  | -4.66408 | 0.25000  |
| C | 3.74178  | -4.39605 | 0.79651  |
| C | 4.33126  | -5.35367 | 1.62334  |
| C | 3.68281  | -6.54073 | 1.94816  |
| C | 2.41457  | -6.78018 | 1.44001  |
| C | 1.79476  | -5.86349 | 0.58893  |
| C | 4.41647  | -3.05124 | 0.60208  |
| C | 3.76979  | -2.01414 | 1.52476  |
| C | 0.41262  | -6.15730 | 0.05389  |
| C | -0.64931 | -5.92831 | 1.13167  |
| C | -1.92167 | -3.39266 | -1.16720 |
| C | -2.14243 | 3.30110  | 1.31615  |
| N | -2.73491 | 4.53321  | 1.46541  |
| C | -3.85332 | 4.70619  | 2.40372  |
| C | -3.37780 | 5.08503  | 3.78573  |
| C | -2.71116 | 4.14448  | 4.57672  |
| C | -2.25388 | 4.47593  | 5.84769  |
| C | -2.45862 | 5.76295  | 6.34713  |
| C | -3.12146 | 6.70826  | 5.56725  |
| C | -3.57846 | 6.36957  | 4.29375  |
| C | -1.98601 | 5.76946  | 1.24754  |
| C | -2.85374 | 6.90486  | 0.77423  |
| C | -2.80021 | 8.14513  | 1.41213  |
| C | -3.57424 | 9.21051  | 0.95387  |
| C | -4.41496 | 9.04170  | -0.14437 |
| C | -4.47157 | 7.80483  | -0.78719 |

|   |          |          |          |
|---|----------|----------|----------|
| C | -3.69153 | 6.74729  | -0.33092 |
| C | 3.06623  | -5.30093 | -2.60797 |
| C | 2.18572  | -5.74850 | -3.74753 |
| C | 2.74289  | -6.15393 | -4.96293 |
| C | 1.92704  | -6.58674 | -6.00782 |
| C | 0.54447  | -6.63082 | -5.84198 |
| C | -0.02073 | -6.22215 | -4.63400 |
| C | 0.79537  | -5.77383 | -3.60054 |
| C | 0.48069  | 5.94855  | 3.89991  |
| C | -0.95579 | 4.85794  | -2.34455 |
| C | -5.08194 | 3.96547  | -1.86717 |
| C | -4.99975 | 1.47365  | 4.84337  |
| C | 5.92822  | -3.07450 | 0.83568  |
| C | 0.28926  | -7.55126 | -0.56389 |
| C | 0.48878  | -3.01658 | -5.60605 |
| C | 5.21913  | -0.36365 | -1.70639 |
| H | -1.55027 | -0.46644 | -1.45658 |
| H | -0.99589 | 1.12627  | -1.11163 |
| H | 0.15204  | -0.00949 | -1.64959 |
| H | -1.59665 | -2.56903 | 2.89242  |
| H | -4.77770 | -1.04786 | 0.56096  |
| H | -3.37824 | -0.09921 | 0.15739  |
| H | -4.03199 | -1.18789 | -1.03055 |
| H | -2.90468 | -3.84972 | -1.34172 |
| H | -1.77539 | -2.76924 | -2.06251 |
| H | -1.23196 | -4.24729 | -1.23561 |
| H | -4.47265 | -4.59212 | 0.79354  |
| H | -4.45180 | -3.63902 | 2.26994  |
| H | -3.20423 | -4.85231 | 1.99579  |
| H | 2.04695  | 2.04535  | 1.68787  |
| H | 1.22451  | 1.06598  | 0.50813  |
| H | 2.56191  | 0.40588  | 1.32565  |
| H | -0.30940 | 0.90293  | 5.00727  |
| H | -0.92813 | 1.91611  | 3.74681  |

|   |          |          |          |
|---|----------|----------|----------|
| H | -1.45806 | 0.21272  | 3.92511  |
| H | 3.53509  | 1.04148  | 4.15680  |
| H | 3.17409  | -0.55579 | 4.81809  |
| H | 2.43338  | 0.88234  | 5.52393  |
| H | -1.21261 | 5.58207  | 0.50639  |
| H | -1.48211 | 6.06885  | 2.16974  |
| H | -2.15436 | 8.27194  | 2.27719  |
| H | -3.52465 | 10.17072 | 1.45934  |
| H | -5.02313 | 9.86909  | -0.49797 |
| H | -5.12215 | 7.66377  | -1.64565 |
| H | -3.73439 | 5.78289  | -0.82081 |
| H | -4.43574 | 3.78894  | 2.44005  |
| H | -4.50547 | 5.48504  | 2.00104  |
| H | -2.56030 | 3.14164  | 4.19271  |
| H | -1.74198 | 3.72930  | 6.44791  |
| H | -2.10456 | 6.02551  | 7.33975  |
| H | -3.28454 | 7.71164  | 5.95016  |
| H | -4.09403 | 7.10688  | 3.68448  |
| H | 2.76657  | 5.65731  | 2.31726  |
| H | 3.51945  | 5.85747  | -0.02986 |
| H | 2.10378  | 4.95074  | -1.84961 |
| H | -0.47527 | 4.12197  | 3.32323  |
| H | -0.03449 | 6.66082  | 3.25102  |
| H | 1.48858  | 6.34011  | 4.07394  |
| H | -0.04285 | 5.92635  | 4.85940  |
| H | 1.03575  | 3.61882  | 5.20359  |
| H | 2.44591  | 4.06593  | 4.22750  |
| H | 1.49961  | 2.64690  | 3.80287  |
| H | -1.04535 | 3.04034  | -1.23852 |
| H | -1.54122 | 5.44659  | -1.63339 |
| H | -1.63336 | 4.51165  | -3.13265 |
| H | -0.22214 | 5.53022  | -2.80234 |
| H | 1.03182  | 2.00337  | -2.25893 |
| H | 1.23026  | 3.44149  | -3.25238 |

|   |          |          |          |
|---|----------|----------|----------|
| H | -0.19535 | 2.42230  | -3.45414 |
| H | -6.78310 | 2.28181  | -0.95619 |
| H | -8.01172 | 1.13614  | 0.84563  |
| H | -6.83172 | 0.53503  | 2.94134  |
| H | -3.32950 | 3.51768  | -0.73617 |
| H | -5.57328 | 4.67327  | -1.19373 |
| H | -5.86137 | 3.45377  | -2.44081 |
| H | -4.47909 | 4.52871  | -2.58763 |
| H | -3.12906 | 2.34559  | -2.89724 |
| H | -4.54257 | 1.34363  | -2.50361 |
| H | -3.05915 | 1.17116  | -1.57429 |
| H | -3.27521 | 1.41690  | 3.59547  |
| H | -5.14838 | 2.55583  | 4.78808  |
| H | -4.42185 | 1.25816  | 5.74836  |
| H | -5.98131 | 1.00235  | 4.95886  |
| H | -3.47995 | -0.93202 | 2.83038  |
| H | -5.01856 | -1.09184 | 3.66578  |
| H | -3.53102 | -0.84927 | 4.60052  |
| H | 2.69985  | -5.69870 | -1.66606 |
| H | 4.07782  | -5.69068 | -2.74525 |
| H | 3.82330  | -6.13354 | -5.08413 |
| H | 2.37288  | -6.89976 | -6.94764 |
| H | -0.09090 | -6.98014 | -6.65060 |
| H | -1.09805 | -6.25128 | -4.49705 |
| H | 0.35549  | -5.45140 | -2.66312 |
| H | 3.88233  | -2.14501 | -3.47550 |
| H | 3.28245  | -3.37539 | -4.56320 |
| H | 5.16095  | -3.66671 | -5.95528 |
| H | 7.50961  | -4.39783 | -6.26745 |
| H | 8.93043  | -4.89390 | -4.29136 |
| H | 7.98465  | -4.65584 | -2.00409 |
| H | 5.62966  | -3.93167 | -1.70941 |
| H | 5.31193  | -5.15833 | 2.04368  |
| H | 4.16107  | -7.26460 | 2.60140  |



|   |          |          |          |
|---|----------|----------|----------|
| H | 1.89363  | -7.69766 | 1.69893  |
| H | 4.25009  | -2.72366 | -0.42829 |
| H | 6.42039  | -3.89049 | 0.29781  |
| H | 6.16614  | -3.18584 | 1.89875  |
| H | 6.37156  | -2.13255 | 0.50170  |
| H | 4.23405  | -1.03166 | 1.38534  |
| H | 3.88955  | -2.30347 | 2.57318  |
| H | 2.69687  | -1.92509 | 1.34275  |
| H | 0.23782  | -5.42801 | -0.74227 |
| H | 1.04758  | -7.71544 | -1.33519 |
| H | -0.69576 | -7.67449 | -1.02668 |
| H | 0.39745  | -8.33828 | 0.18953  |
| H | -0.59309 | -4.91501 | 1.54326  |
| H | -0.51116 | -6.62595 | 1.96492  |
| H | -1.65560 | -6.07377 | 0.72721  |
| H | 0.91975  | -0.24934 | -6.06430 |
| H | 2.60331  | 1.54262  | -5.82636 |
| H | 3.90023  | 1.73275  | -3.72720 |
| H | 0.26369  | -2.86685 | -3.48986 |
| H | 1.42489  | -3.57612 | -5.54327 |
| H | 0.52890  | -2.38177 | -6.49704 |
| H | -0.31385 | -3.74372 | -5.74865 |
| H | -1.35262 | -0.90606 | -3.54810 |
| H | -1.93637 | -2.31503 | -4.46295 |
| H | -1.25297 | -0.91843 | -5.30641 |
| H | 3.29932  | -0.41860 | -0.75551 |
| H | 5.23071  | -1.42461 | -1.96654 |
| H | 5.79803  | -0.24105 | -0.78512 |
| H | 5.73957  | 0.17721  | -2.50450 |
| H | 2.87299  | 2.07930  | -0.92655 |
| H | 4.44820  | 2.26297  | -1.70629 |
| H | 4.34744  | 1.67362  | -0.04867 |
| C | 0.04534  | -1.64468 | 1.97103  |
| O | 0.79689  | -1.54069 | 3.07430  |

216

TS3

|    |          |          |          |
|----|----------|----------|----------|
| C  | 0.67654  | -5.32988 | 0.34424  |
| C  | 1.86680  | -4.56073 | 0.35822  |
| C  | 2.94136  | -4.93260 | 1.19662  |
| C  | 2.82754  | -6.10236 | 1.95263  |
| C  | 1.68501  | -6.88800 | 1.90980  |
| C  | 0.61551  | -6.49047 | 1.11579  |
| N  | 1.87194  | -3.36474 | -0.39336 |
| C  | 2.66286  | -2.97886 | -1.40910 |
| N  | 3.46559  | -3.80896 | -2.14505 |
| C  | 3.45701  | -5.26094 | -1.96938 |
| C  | 3.63256  | -6.00506 | -3.26740 |
| C  | 2.79160  | -5.75329 | -4.35418 |
| C  | 2.94253  | -6.45544 | -5.54523 |
| C  | 3.93569  | -7.42852 | -5.66223 |
| C  | 4.77237  | -7.69318 | -4.58050 |
| C  | 4.62201  | -6.98153 | -3.39069 |
| C  | 4.17744  | -4.07403 | 1.38232  |
| C  | 5.48246  | -4.85568 | 1.20917  |
| C  | -0.50508 | -4.92599 | -0.51709 |
| C  | -0.33259 | -5.44135 | -1.95031 |
| Y  | 0.97409  | -1.27776 | 0.04514  |
| C  | -1.28563 | -1.66019 | 0.64242  |
| C  | -2.59808 | -1.70837 | 0.82606  |
| Al | -3.91566 | -1.73763 | -0.71091 |
| C  | -3.43432 | 0.13099  | -1.63398 |
| Y  | -1.78902 | 0.76476  | 0.18052  |
| C  | 0.24946  | 0.78373  | -1.25522 |
| N  | -2.96729 | 2.19951  | 1.52814  |
| C  | -4.22793 | 1.90124  | 2.09234  |
| C  | -5.44190 | 2.17313  | 1.41075  |
| C  | -6.64709 | 1.75300  | 1.97704  |
| C  | -6.68507 | 1.03897  | 3.16697  |

|   |          |         |          |
|---|----------|---------|----------|
| C | -5.49296 | 0.74878 | 3.81621  |
| C | -4.26236 | 1.17146 | 3.31026  |
| C | -5.49770 | 2.88798 | 0.07562  |
| C | -6.11913 | 4.27892 | 0.22421  |
| C | -3.01665 | 0.90770 | 4.13430  |
| C | -3.07705 | 1.69560 | 5.44980  |
| C | -2.49598 | 3.35872 | 0.99767  |
| N | -1.62680 | 3.11004 | 0.00667  |
| C | -0.67834 | 3.91088 | -0.66104 |
| C | 0.46085  | 4.43361 | -0.00988 |
| C | 1.44086  | 5.06961 | -0.77429 |
| C | 1.31778  | 5.19186 | -2.15314 |
| C | 0.19711  | 4.66928 | -2.78869 |
| C | -0.80484 | 4.02188 | -2.06599 |
| C | 0.63721  | 4.27393 | 1.48370  |
| C | 1.40479  | 5.41943 | 2.14146  |
| C | -2.02105 | 3.44442 | -2.75884 |
| C | -3.22694 | 4.37903 | -2.61776 |
| N | -2.87658 | 4.59798 | 1.44152  |
| C | -2.28942 | 5.82094 | 0.87499  |
| C | -3.20746 | 7.01344 | 0.93002  |
| C | -2.97435 | 8.03893 | 1.84976  |
| C | -3.81386 | 9.14976 | 1.90463  |
| C | -4.89487 | 9.24942 | 1.03123  |
| C | -5.12075 | 8.24258 | 0.09316  |
| C | -4.27757 | 7.13654 | 0.04018  |
| C | -3.44697 | 4.75808 | 2.78084  |
| C | -2.40660 | 5.02040 | 3.84450  |
| C | -2.46333 | 6.16972 | 4.63433  |
| C | -1.51208 | 6.39700 | 5.62880  |
| C | -0.49466 | 5.47089 | 5.84626  |
| C | -0.43771 | 4.31206 | 5.07132  |
| C | -1.38727 | 4.09231 | 4.07912  |
| C | -6.27267 | 2.07924 | -0.97252 |

|    |          |          |          |
|----|----------|----------|----------|
| C  | -2.78963 | -0.57515 | 4.44118  |
| C  | 1.28598  | 2.93103  | 1.81892  |
| C  | -1.78476 | 3.05644  | -4.21617 |
| N  | 2.56463  | -1.64623 | -1.63645 |
| C  | 2.74338  | -0.95392 | -2.84955 |
| C  | 3.57151  | 0.19425  | -2.84876 |
| C  | 3.65156  | 0.97925  | -4.00094 |
| C  | 2.93892  | 0.65316  | -5.14623 |
| C  | 2.11440  | -0.46765 | -5.13816 |
| C  | 1.98823  | -1.27387 | -4.00633 |
| C  | 4.35494  | 0.60627  | -1.61868 |
| C  | 5.85053  | 0.75696  | -1.91566 |
| C  | 0.97070  | -2.39767 | -3.98803 |
| C  | 0.72593  | -3.02900 | -5.36005 |
| O  | -0.55799 | -0.43974 | 1.60696  |
| Al | 0.64850  | -0.76076 | 2.97825  |
| C  | 0.61050  | 0.58920  | 4.41355  |
| C  | 0.46672  | -2.68496 | 3.37107  |
| C  | 2.45299  | -0.46752 | 1.90234  |
| C  | 3.79806  | 1.89920  | -1.01190 |
| C  | -0.35995 | -1.91181 | -3.40580 |
| C  | 4.61461  | -3.29212 | -2.89175 |
| C  | 5.91544  | -3.41712 | -2.13920 |
| C  | 6.86277  | -4.37935 | -2.49355 |
| C  | 8.07659  | -4.46317 | -1.81174 |
| C  | 8.36003  | -3.57304 | -0.77842 |
| C  | 7.41846  | -2.60875 | -0.41867 |
| C  | 6.20087  | -2.54165 | -1.08748 |
| C  | 4.14519  | -3.42059 | 2.77139  |
| C  | -1.84814 | -5.36064 | 0.06754  |
| C  | -5.71431 | -1.53169 | 0.07715  |
| C  | -3.63338 | -3.04414 | -2.16577 |
| H  | 0.59039  | 1.76155  | -0.88477 |
| H  | 1.09292  | 0.43528  | -1.86793 |

|   |          |          |          |
|---|----------|----------|----------|
| H | -0.47447 | 1.02788  | -2.05193 |
| H | -3.03917 | -1.20518 | 1.69950  |
| H | -3.71138 | 1.15924  | -1.34530 |
| H | -2.53159 | 0.17647  | -2.26711 |
| H | -4.22614 | -0.11052 | -2.35386 |
| H | -3.86495 | -2.62750 | -3.15488 |
| H | -2.59893 | -3.39915 | -2.19952 |
| H | -4.27121 | -3.92801 | -2.03879 |
| H | -5.75748 | -0.71737 | 0.81174  |
| H | -6.00419 | -2.44981 | 0.60645  |
| H | -6.49868 | -1.33794 | -0.66640 |
| H | 3.00586  | -0.32102 | 2.83810  |
| H | 2.58368  | 0.48433  | 1.36313  |
| H | 3.06976  | -1.22287 | 1.38464  |
| H | 0.31734  | 0.14391  | 5.37173  |
| H | 1.59332  | 1.05374  | 4.56335  |
| H | -0.10022 | 1.39518  | 4.20656  |
| H | 0.66261  | -3.36125 | 2.52771  |
| H | -0.56373 | -2.89266 | 3.68832  |
| H | 1.12744  | -3.01211 | 4.18395  |
| H | -2.02329 | 5.61923  | -0.15984 |
| H | -1.36253 | 6.06504  | 1.40689  |
| H | -2.12962 | 7.95887  | 2.52805  |
| H | -3.62122 | 9.93803  | 2.62673  |
| H | -5.55209 | 10.11308 | 1.07272  |
| H | -5.95034 | 8.32262  | -0.60332 |
| H | -4.44478 | 6.36255  | -0.70028 |
| H | -4.02170 | 3.86539  | 3.02671  |
| H | -4.15422 | 5.59055  | 2.74142  |
| H | -1.35897 | 3.17899  | 3.49414  |
| H | 0.33304  | 3.56775  | 5.24807  |
| H | 0.24523  | 5.64483  | 6.62205  |
| H | -1.56824 | 7.29729  | 6.23401  |
| H | -3.25966 | 6.89021  | 4.46783  |

|   |          |          |          |
|---|----------|----------|----------|
| H | 2.31830  | 5.47316  | -0.27929 |
| H | 2.09243  | 5.68853  | -2.72992 |
| H | 0.10638  | 4.75532  | -3.86645 |
| H | -0.35620 | 4.26470  | 1.93390  |
| H | 1.00461  | 6.39384  | 1.84316  |
| H | 2.46926  | 5.39989  | 1.88402  |
| H | 1.32526  | 5.33932  | 3.22904  |
| H | 1.38785  | 2.80412  | 2.89948  |
| H | 2.28045  | 2.86136  | 1.36774  |
| H | 0.69065  | 2.09309  | 1.44443  |
| H | -2.28288 | 2.52806  | -2.22210 |
| H | -3.45714 | 4.55219  | -1.56350 |
| H | -4.11592 | 3.94371  | -3.08688 |
| H | -3.02729 | 5.34754  | -3.08905 |
| H | -0.90023 | 2.41971  | -4.31916 |
| H | -1.64898 | 3.93292  | -4.85915 |
| H | -2.65026 | 2.50564  | -4.59815 |
| H | -7.57467 | 1.96734  | 1.45429  |
| H | -7.63288 | 0.70536  | 3.57835  |
| H | -5.51308 | 0.19307  | 4.74937  |
| H | -4.47430 | 3.01281  | -0.29111 |
| H | -5.55314 | 4.90181  | 0.91853  |
| H | -7.14564 | 4.20084  | 0.59795  |
| H | -6.15671 | 4.79082  | -0.74343 |
| H | -6.14177 | 2.52263  | -1.96562 |
| H | -7.34543 | 2.07566  | -0.75421 |
| H | -5.94236 | 1.04020  | -1.00462 |
| H | -2.16178 | 1.26163  | 3.55214  |
| H | -3.30196 | 2.75097  | 5.28323  |
| H | -2.12028 | 1.63404  | 5.97811  |
| H | -3.85330 | 1.28654  | 6.10585  |
| H | -2.63021 | -1.16573 | 3.53776  |
| H | -3.63940 | -1.00831 | 4.97882  |
| H | -1.90423 | -0.69429 | 5.07227  |

|   |          |          |          |
|---|----------|----------|----------|
| H | 2.50769  | -5.54715 | -1.52151 |
| H | 4.23979  | -5.56519 | -1.26655 |
| H | 5.28035  | -7.18031 | -2.54875 |
| H | 5.54676  | -8.45046 | -4.66278 |
| H | 4.05501  | -7.97749 | -6.59166 |
| H | 2.28204  | -6.24552 | -6.38171 |
| H | 2.02274  | -4.99543 | -4.26258 |
| H | 4.43314  | -2.25016 | -3.14374 |
| H | 4.67278  | -3.84191 | -3.83456 |
| H | 6.64663  | -5.06062 | -3.31215 |
| H | 8.80493  | -5.21747 | -2.09569 |
| H | 9.30984  | -3.62969 | -0.25477 |
| H | 7.63231  | -1.91008 | 0.38525  |
| H | 5.46193  | -1.80053 | -0.80223 |
| H | 3.64849  | -6.39197 | 2.60217  |
| H | 1.61892  | -7.79393 | 2.50524  |
| H | -0.28831 | -7.08977 | 1.10135  |
| H | 4.16208  | -3.27756 | 0.63174  |
| H | 5.60848  | -5.23131 | 0.19079  |
| H | 5.52956  | -5.70739 | 1.89464  |
| H | 6.33930  | -4.21244 | 1.42105  |
| H | 4.96051  | -2.69621 | 2.87861  |
| H | 4.26217  | -4.17919 | 3.55281  |
| H | 3.19686  | -2.91137 | 2.95128  |
| H | -0.52114 | -3.83166 | -0.56139 |
| H | 0.56668  | -5.02638 | -2.41319 |
| H | -1.19028 | -5.16038 | -2.57010 |
| H | -0.24524 | -6.53341 | -1.96423 |
| H | -1.94231 | -5.04137 | 1.10912  |
| H | -1.98525 | -6.44680 | 0.02215  |
| H | -2.66308 | -4.90507 | -0.49784 |
| H | 1.54122  | -0.70865 | -6.02753 |
| H | 3.01517  | 1.27015  | -6.03669 |
| H | 4.28403  | 1.86264  | -3.99490 |

|   |          |          |          |
|---|----------|----------|----------|
| H | 1.34632  | -3.18599 | -3.33146 |
| H | 1.66407  | -3.30519 | -5.85074 |
| H | 0.18116  | -2.35252 | -6.02678 |
| H | 0.11253  | -3.92939 | -5.25109 |
| H | -0.26753 | -1.56973 | -2.37027 |
| H | -1.10513 | -2.70893 | -3.41815 |
| H | -0.74826 | -1.06550 | -3.98254 |
| H | 4.22424  | -0.19007 | -0.87814 |
| H | 6.26137  | -0.14069 | -2.38456 |
| H | 6.40812  | 0.94219  | -0.99101 |
| H | 6.03728  | 1.60221  | -2.58651 |
| H | 2.73810  | 1.80777  | -0.76784 |
| H | 3.88853  | 2.73547  | -1.71279 |
| H | 4.34261  | 2.16299  | -0.09826 |

216

Int4

|   |         |          |          |
|---|---------|----------|----------|
| C | 0.64888 | -5.58960 | 0.16547  |
| C | 1.76681 | -4.73264 | 0.32580  |
| C | 2.79393 | -5.07907 | 1.23302  |
| C | 2.68336 | -6.27530 | 1.94717  |
| C | 1.59954 | -7.12637 | 1.78496  |
| C | 0.59151 | -6.77790 | 0.89409  |
| N | 1.73355 | -3.49604 | -0.35891 |
| C | 2.50514 | -3.04058 | -1.35675 |
| N | 3.41475 | -3.77850 | -2.07305 |
| C | 3.56356 | -5.22099 | -1.90417 |
| C | 3.92285 | -5.92151 | -3.18850 |
| C | 3.19235 | -5.69332 | -4.35696 |
| C | 3.50936 | -6.36414 | -5.53343 |
| C | 4.56269 | -7.27886 | -5.55474 |
| C | 5.29472 | -7.51445 | -4.39315 |
| C | 4.97738 | -6.83519 | -3.21745 |
| C | 3.99523 | -4.19309 | 1.49728  |
| C | 5.32572 | -4.94458 | 1.39089  |



|    |          |          |          |
|----|----------|----------|----------|
| C  | -0.44934 | -5.26332 | -0.82744 |
| C  | -0.12654 | -5.85962 | -2.20322 |
| Y  | 0.77375  | -1.38870 | 0.13530  |
| C  | -1.75165 | -1.98536 | 0.21908  |
| C  | -2.54573 | -2.69928 | 0.84357  |
| Al | -3.95821 | -1.62700 | -0.75524 |
| C  | -3.40251 | 0.12127  | -1.61692 |
| Y  | -1.71489 | 0.68354  | 0.37546  |
| C  | 0.08119  | 0.49419  | -1.37076 |
| N  | -3.00232 | 2.19809  | 1.55048  |
| C  | -4.24984 | 1.99316  | 2.16184  |
| C  | -5.46821 | 2.33804  | 1.52693  |
| C  | -6.67281 | 2.01625  | 2.15454  |
| C  | -6.70542 | 1.33550  | 3.36501  |
| C  | -5.50824 | 0.96123  | 3.96238  |
| C  | -4.27730 | 1.27672  | 3.38554  |
| C  | -5.51605 | 3.00670  | 0.16825  |
| C  | -6.13393 | 4.40375  | 0.25624  |
| C  | -3.00441 | 0.81902  | 4.06962  |
| C  | -2.92650 | 1.29431  | 5.52277  |
| C  | -2.45166 | 3.32469  | 1.03729  |
| N  | -1.54577 | 3.02624  | 0.09431  |
| C  | -0.57170 | 3.80600  | -0.56513 |
| C  | 0.56011  | 4.33546  | 0.09468  |
| C  | 1.53998  | 4.97917  | -0.66309 |
| C  | 1.42978  | 5.09940  | -2.04313 |
| C  | 0.32115  | 4.56488  | -2.68872 |
| C  | -0.68399 | 3.91374  | -1.97292 |
| C  | 0.73384  | 4.19296  | 1.59010  |
| C  | 1.35823  | 5.42060  | 2.25506  |
| C  | -1.89607 | 3.34039  | -2.67799 |
| C  | -3.08161 | 4.30803  | -2.60246 |
| N  | -2.79849 | 4.58638  | 1.45709  |
| C  | -2.15448 | 5.77696  | 0.88699  |

|    |          |          |          |
|----|----------|----------|----------|
| C  | -3.03015 | 7.00164  | 0.91368  |
| C  | -2.75972 | 8.04193  | 1.80603  |
| C  | -3.56055 | 9.18213  | 1.83321  |
| C  | -4.64040 | 9.29553  | 0.96007  |
| C  | -4.90455 | 8.27174  | 0.05056  |
| C  | -4.09981 | 7.13651  | 0.02510  |
| C  | -3.35902 | 4.78853  | 2.79608  |
| C  | -2.31275 | 4.97559  | 3.87026  |
| C  | -2.28018 | 6.14104  | 4.63820  |
| C  | -1.32848 | 6.30520  | 5.64440  |
| C  | -0.39864 | 5.29915  | 5.89620  |
| C  | -0.42800 | 4.12667  | 5.14058  |
| C  | -1.37846 | 3.96922  | 4.13663  |
| C  | -6.28076 | 2.15025  | -0.84842 |
| C  | -2.84872 | -0.70227 | 3.98931  |
| C  | 1.53293  | 2.93313  | 1.92806  |
| C  | -1.62408 | 2.89203  | -4.11187 |
| N  | 2.30157  | -1.72257 | -1.59838 |
| C  | 2.38392  | -1.05911 | -2.84001 |
| C  | 3.10264  | 0.15897  | -2.90986 |
| C  | 3.03212  | 0.93099  | -4.07076 |
| C  | 2.27756  | 0.52620  | -5.16238 |
| C  | 1.58440  | -0.67786 | -5.09657 |
| C  | 1.61518  | -1.48107 | -3.95499 |
| C  | 3.96612  | 0.64684  | -1.76247 |
| C  | 5.44422  | 0.68036  | -2.17166 |
| C  | 0.75563  | -2.73143 | -3.90423 |
| C  | 0.58342  | -3.40338 | -5.26976 |
| O  | -0.20751 | 0.04253  | 1.61546  |
| Al | 0.87546  | -0.62768 | 2.87774  |
| C  | 0.97179  | 0.35854  | 4.57402  |
| C  | 0.34088  | -2.57034 | 2.92367  |
| C  | 2.64598  | -0.56951 | 1.74828  |
| C  | 3.54084  | 2.02359  | -1.23997 |

|   |          |          |          |
|---|----------|----------|----------|
| C | -0.62568 | -2.44772 | -3.30644 |
| C | 4.57252  | -3.12536 | -2.68899 |
| C | 5.79074  | -3.13138 | -1.79861 |
| C | 6.87350  | -3.96896 | -2.07215 |
| C | 8.01117  | -3.94424 | -1.26541 |
| C | 8.07869  | -3.07275 | -0.18106 |
| C | 6.99710  | -2.23852 | 0.10465  |
| C | 5.85932  | -2.27617 | -0.69392 |
| C | 3.88858  | -3.54011 | 2.88019  |
| C | -1.83303 | -5.72461 | -0.37095 |
| C | -5.27214 | -1.34993 | 0.69263  |
| C | -4.24401 | -3.02493 | -2.09911 |
| H | -0.28141 | 1.52926  | -1.46467 |
| H | 1.16309  | 0.68364  | -1.30644 |
| H | -0.05602 | 0.07204  | -2.37194 |
| H | -3.16570 | -3.33817 | 1.43807  |
| H | -3.64592 | 1.09832  | -1.17235 |
| H | -2.41823 | 0.16506  | -2.10446 |
| H | -4.10499 | 0.06622  | -2.45985 |
| H | -5.03895 | -2.74040 | -2.80164 |
| H | -3.34775 | -3.22710 | -2.69458 |
| H | -4.55384 | -3.97204 | -1.64087 |
| H | -4.95332 | -0.64593 | 1.47066  |
| H | -5.54762 | -2.28525 | 1.19648  |
| H | -6.20039 | -0.93634 | 0.27666  |
| H | 3.31375  | -0.48387 | 2.61537  |
| H | 2.79453  | 0.36130  | 1.18161  |
| H | 3.10978  | -1.38596 | 1.17130  |
| H | 0.97974  | -0.30248 | 5.44898  |
| H | 1.85872  | 0.99970  | 4.64226  |
| H | 0.09378  | 1.00917  | 4.66863  |
| H | 0.46078  | -3.25192 | 2.06627  |
| H | -0.72097 | -2.62395 | 3.19130  |
| H | 0.90077  | -3.06875 | 3.72567  |

|   |          |          |          |
|---|----------|----------|----------|
| H | -1.88201 | 5.55530  | -0.14201 |
| H | -1.22764 | 5.99300  | 1.42895  |
| H | -1.91625 | 7.95004  | 2.48468  |
| H | -3.33922 | 9.98204  | 2.53402  |
| H | -5.26751 | 10.18209 | 0.98003  |
| H | -5.73423 | 8.36115  | -0.64476 |
| H | -4.29656 | 6.34741  | -0.69211 |
| H | -4.00039 | 3.94409  | 3.04325  |
| H | -4.00193 | 5.67118  | 2.75060  |
| H | -1.40370 | 3.05237  | 3.55812  |
| H | 0.28160  | 3.32824  | 5.33584  |
| H | 0.34243  | 5.42395  | 6.68035  |
| H | -1.31543 | 7.21916  | 6.23147  |
| H | -3.00902 | 6.92390  | 4.44571  |
| H | 2.41045  | 5.38799  | -0.15951 |
| H | 2.20598  | 5.60234  | -2.61261 |
| H | 0.23857  | 4.64766  | -3.76747 |
| H | -0.25842 | 4.06551  | 2.02449  |
| H | 0.86425  | 6.34804  | 1.94752  |
| H | 2.42252  | 5.51523  | 2.01410  |
| H | 1.27117  | 5.33528  | 3.34170  |
| H | 1.60387  | 2.80380  | 3.01265  |
| H | 2.54828  | 3.00174  | 1.52376  |
| H | 1.05571  | 2.04040  | 1.51837  |
| H | -2.19290 | 2.45227  | -2.11508 |
| H | -3.33804 | 4.51960  | -1.56085 |
| H | -3.96733 | 3.87885  | -3.08394 |
| H | -2.84660 | 5.25705  | -3.09666 |
| H | -0.75355 | 2.23034  | -4.15938 |
| H | -1.44748 | 3.73919  | -4.78376 |
| H | -2.49085 | 2.34747  | -4.50085 |
| H | -7.60684 | 2.28790  | 1.66999  |
| H | -7.65449 | 1.08723  | 3.83070  |
| H | -5.52540 | 0.41051  | 4.89879  |

|   |          |          |          |
|---|----------|----------|----------|
| H | -4.49049 | 3.11343  | -0.19647 |
| H | -5.57593 | 5.04458  | 0.94135  |
| H | -7.16877 | 4.34860  | 0.61073  |
| H | -6.14687 | 4.88438  | -0.72799 |
| H | -6.19334 | 2.57935  | -1.85262 |
| H | -7.34603 | 2.09884  | -0.60038 |
| H | -5.89972 | 1.12743  | -0.87307 |
| H | -2.16363 | 1.25454  | 3.52285  |
| H | -3.05561 | 2.37706  | 5.59409  |
| H | -1.95318 | 1.03910  | 5.95400  |
| H | -3.69629 | 0.81849  | 6.13987  |
| H | -2.81671 | -1.05093 | 2.95297  |
| H | -3.68383 | -1.21039 | 4.48424  |
| H | -1.91987 | -1.01699 | 4.47468  |
| H | 2.62553  | -5.62438 | -1.52845 |
| H | 4.32359  | -5.44226 | -1.14836 |
| H | 5.55510  | -7.00982 | -2.31317 |
| H | 6.11827  | -8.22273 | -4.40222 |
| H | 4.81238  | -7.80254 | -6.47284 |
| H | 2.93333  | -6.17337 | -6.43450 |
| H | 2.38391  | -4.97228 | -4.33976 |
| H | 4.30156  | -2.10570 | -2.95330 |
| H | 4.79096  | -3.64744 | -3.62370 |
| H | 6.82299  | -4.63903 | -2.92661 |
| H | 8.84749  | -4.60014 | -1.48993 |
| H | 8.96823  | -3.04451 | 0.44154  |
| H | 7.03998  | -1.55775 | 0.95011  |
| H | 5.01842  | -1.62685 | -0.47310 |
| H | 3.46609  | -6.54003 | 2.65211  |
| H | 1.53794  | -8.05172 | 2.35032  |
| H | -0.25812 | -7.44055 | 0.76300  |
| H | 4.00320  | -3.39813 | 0.74673  |
| H | 5.49274  | -5.35831 | 0.39353  |
| H | 5.37895  | -5.76740 | 2.11059  |

|      |          |          |          |
|------|----------|----------|----------|
| H    | 6.15550  | -4.26605 | 1.59898  |
| H    | 4.71895  | -2.84376 | 3.04018  |
| H    | 3.92678  | -4.30061 | 3.66783  |
| H    | 2.95226  | -2.99294 | 2.98968  |
| H    | -0.48097 | -4.17514 | -0.93491 |
| H    | 0.80118  | -5.45453 | -2.61317 |
| H    | -0.92863 | -5.64807 | -2.91833 |
| H    | -0.01282 | -6.94697 | -2.13393 |
| H    | -2.02479 | -5.43523 | 0.66592  |
| H    | -1.94490 | -6.81224 | -0.44044 |
| H    | -2.60318 | -5.27528 | -1.00400 |
| H    | 0.98968  | -0.99174 | -5.94837 |
| H    | 2.22904  | 1.13864  | -6.05796 |
| H    | 3.57836  | 1.86925  | -4.11269 |
| H    | 1.24986  | -3.45251 | -3.25019 |
| H    | 1.53865  | -3.51073 | -5.79249 |
| H    | -0.09006 | -2.83378 | -5.91866 |
| H    | 0.14138  | -4.39713 | -5.14440 |
| H    | -0.57573 | -2.08089 | -2.27905 |
| H    | -1.23132 | -3.35768 | -3.29691 |
| H    | -1.15451 | -1.68900 | -3.89374 |
| H    | 3.84773  | -0.07269 | -0.94663 |
| H    | 5.78116  | -0.28167 | -2.56521 |
| H    | 6.07742  | 0.93062  | -1.31374 |
| H    | 5.61382  | 1.43654  | -2.94587 |
| H    | 2.50410  | 2.04352  | -0.89804 |
| H    | 3.63225  | 2.79131  | -2.01444 |
| H    | 4.17832  | 2.32231  | -0.40056 |
| 216  |          |          |          |
| Int5 |          |          |          |
| C    | -1.87621 | 0.79060  | -7.76269 |
| C    | -2.95963 | 0.72680  | -6.88002 |
| C    | -4.24626 | 0.95860  | -7.37057 |
| C    | -4.45040 | 1.25313  | -8.71718 |

|   |          |          |          |
|---|----------|----------|----------|
| C | -3.36520 | 1.32380  | -9.58742 |
| C | -2.07639 | 1.09081  | -9.10668 |
| C | -2.75365 | 0.42804  | -5.41922 |
| N | -2.10252 | 1.54243  | -4.70403 |
| C | -2.57385 | 2.85769  | -5.13540 |
| C | -4.03368 | 3.10580  | -4.84405 |
| C | -4.77616 | 3.92760  | -5.69557 |
| C | -6.10470 | 4.23130  | -5.40999 |
| C | -6.71363 | 3.70524  | -4.27126 |
| C | -5.98612 | 2.86823  | -3.42758 |
| C | -4.65683 | 2.56983  | -3.71567 |
| C | -1.70283 | 1.38379  | -3.39548 |
| N | -1.75820 | 0.24035  | -2.68730 |
| C | -2.02883 | -1.08195 | -3.09083 |
| C | -0.98573 | -1.87819 | -3.62754 |
| C | -1.25092 | -3.20609 | -3.96754 |
| C | -2.50162 | -3.77292 | -3.75477 |
| C | -3.50208 | -3.00442 | -3.17419 |
| C | -3.28802 | -1.66831 | -2.82966 |
| C | 0.40382  | -1.31709 | -3.85193 |
| C | 0.62295  | -0.90713 | -5.31062 |
| C | -4.40784 | -0.89860 | -2.16076 |
| C | -5.66212 | -0.80111 | -3.03423 |
| N | -1.27978 | 2.41543  | -2.62934 |
| Y | -1.27460 | 1.29718  | -0.61325 |
| C | 1.58473  | 1.22271  | -0.65749 |
| C | 1.46436  | 0.03965  | -0.98436 |
| C | -0.69450 | 3.64463  | -2.99474 |
| C | -1.30783 | 4.84107  | -2.55062 |
| C | -0.63726 | 6.05294  | -2.71776 |
| C | 0.60923  | 6.10708  | -3.32928 |
| C | 1.18191  | 4.93507  | -3.80881 |
| C | 0.55299  | 3.69694  | -3.66024 |
| C | -2.67727 | 4.82334  | -1.90545 |

|    |          |          |          |
|----|----------|----------|----------|
| C  | -2.58866 | 5.08841  | -0.40188 |
| C  | 1.19781  | 2.46919  | -4.26985 |
| C  | 1.09280  | 2.54162  | -5.79908 |
| C  | 2.65243  | 2.27713  | -3.83637 |
| C  | -3.65152 | 5.79495  | -2.57561 |
| C  | -3.53578 | 1.82228  | 0.36133  |
| Al | -2.36537 | 2.03582  | 2.12734  |
| C  | -2.57050 | 3.84930  | 2.87425  |
| Y  | 0.71899  | 0.19942  | 1.74603  |
| C  | -1.00060 | -0.99968 | 0.26697  |
| Al | 2.26170  | 2.88174  | 0.31992  |
| C  | 0.94953  | 4.34025  | 0.41743  |
| O  | -0.71227 | 1.72696  | 1.44824  |
| C  | -2.94515 | 0.51591  | 3.25717  |
| C  | 2.54579  | 2.03214  | 2.19234  |
| N  | 0.87794  | -1.02955 | 3.67917  |
| C  | 1.76905  | -1.94674 | 3.20933  |
| N  | 2.47601  | -2.76566 | 4.05668  |
| C  | 2.85666  | -2.27817 | 5.39029  |
| C  | 4.18914  | -1.57002 | 5.37155  |
| C  | 5.33745  | -2.18268 | 5.87696  |
| C  | 6.56490  | -1.52092 | 5.84884  |
| C  | 6.65486  | -0.23678 | 5.31624  |
| C  | 5.51374  | 0.38048  | 4.80246  |
| C  | 4.29317  | -0.28572 | 4.82818  |
| N  | 1.87893  | -1.89591 | 1.87921  |
| C  | 2.65583  | -2.64842 | 0.97394  |
| C  | 2.03522  | -3.72920 | 0.29662  |
| C  | 2.73972  | -4.38872 | -0.71220 |
| C  | 4.02396  | -3.99697 | -1.07244 |
| C  | 4.63082  | -2.94962 | -0.39056 |
| C  | 3.97682  | -2.27294 | 0.64235  |
| C  | 0.65975  | -4.23123 | 0.69308  |
| C  | 0.75627  | -5.55290 | 1.46638  |



|   |          |          |          |
|---|----------|----------|----------|
| C | 4.70620  | -1.16894 | 1.37932  |
| C | 4.91026  | 0.05361  | 0.48228  |
| C | 4.00183  | 3.34747  | -0.49632 |
| C | 0.14124  | -1.11668 | 4.87997  |
| C | 0.13668  | -0.00237 | 5.75149  |
| C | -0.67677 | -0.01885 | 6.88602  |
| C | -1.46666 | -1.11818 | 7.18659  |
| C | -1.45419 | -2.21525 | 6.33191  |
| C | -0.67632 | -2.23876 | 5.17358  |
| C | 0.99497  | 1.21430  | 5.48310  |
| C | 1.90202  | 1.56179  | 6.66624  |
| C | -0.82076 | -3.40237 | 4.21011  |
| C | -1.86913 | -3.06022 | 3.14746  |
| C | 0.14315  | 2.41594  | 5.06420  |
| C | -1.18375 | -4.72447 | 4.89154  |
| C | -0.28521 | -4.38914 | -0.50085 |
| C | 6.05279  | -1.63051 | 1.94442  |
| C | 1.50781  | -2.28201 | -3.41064 |
| C | -4.75341 | -1.51552 | -0.79968 |
| C | 3.37553  | -3.79483 | 3.54554  |
| C | 3.47169  | -4.98548 | 4.46240  |
| C | 4.71385  | -5.55747 | 4.74110  |
| C | 4.80617  | -6.68829 | 5.55130  |
| C | 3.65498  | -7.25262 | 6.09708  |
| C | 2.41111  | -6.68240 | 5.82596  |
| C | 2.32243  | -5.55736 | 5.01241  |
| H | 1.43965  | -0.98280 | -1.29863 |
| H | -3.54985 | 4.28984  | 2.64537  |
| H | -1.81104 | 4.54993  | 2.50883  |
| H | -2.48626 | 3.82600  | 3.96832  |
| H | -2.17807 | 0.17590  | 3.96598  |
| H | -3.24546 | -0.36210 | 2.67171  |
| H | -3.81259 | 0.79722  | 3.86968  |
| H | 1.44512  | 5.26503  | 0.74309  |

|   |          |          |          |
|---|----------|----------|----------|
| H | 0.14193  | 4.13157  | 1.12504  |
| H | 0.50571  | 4.56827  | -0.55922 |
| H | 4.56788  | 2.50689  | -0.90962 |
| H | 4.64954  | 3.84407  | 0.23989  |
| H | 3.84304  | 4.06610  | -1.31002 |
| H | 2.89701  | -3.14158 | 6.05856  |
| H | 2.07681  | -1.62002 | 5.76569  |
| H | 5.26500  | -3.18370 | 6.29436  |
| H | 7.45045  | -2.00809 | 6.24689  |
| H | 7.60933  | 0.28119  | 5.29922  |
| H | 5.57296  | 1.38069  | 4.38289  |
| H | 3.40522  | 0.19711  | 4.43549  |
| H | 4.37640  | -3.38165 | 3.38222  |
| H | 3.01140  | -4.12478 | 2.57514  |
| H | 5.61250  | -5.10979 | 4.32384  |
| H | 5.77873  | -7.12400 | 5.76158  |
| H | 3.72642  | -8.12990 | 6.73325  |
| H | 1.50834  | -7.11430 | 6.24855  |
| H | 1.36132  | -5.10031 | 4.80880  |
| H | -0.68236 | 0.84571  | 7.54392  |
| H | -2.09263 | -1.12203 | 8.07391  |
| H | -2.08598 | -3.06715 | 6.56018  |
| H | 1.64711  | 0.95779  | 4.64412  |
| H | 1.32174  | 1.88250  | 7.53761  |
| H | 2.57757  | 2.38106  | 6.39829  |
| H | 2.51301  | 0.70468  | 6.96364  |
| H | -0.44530 | 2.20340  | 4.16734  |
| H | 0.76822  | 3.29025  | 4.85309  |
| H | -0.56474 | 2.68869  | 5.85341  |
| H | 0.13528  | -3.55157 | 3.70154  |
| H | -2.85136 | -2.92847 | 3.61263  |
| H | -1.94377 | -3.85278 | 2.39491  |
| H | -1.62244 | -2.12876 | 2.63963  |
| H | -0.55452 | -4.92266 | 5.76463  |

|   |          |          |           |
|---|----------|----------|-----------|
| H | -1.06732 | -5.55316 | 4.18619   |
| H | -2.22649 | -4.73184 | 5.22555   |
| H | 2.26881  | -5.22210 | -1.22598  |
| H | 4.55157  | -4.51152 | -1.87011  |
| H | 5.64101  | -2.65178 | -0.65754  |
| H | 0.23040  | -3.48878 | 1.37024   |
| H | 1.20745  | -6.33612 | 0.84760   |
| H | -0.24154 | -5.89298 | 1.76394   |
| H | 1.36019  | -5.46073 | 2.37269   |
| H | -0.36583 | -3.47235 | -1.08727  |
| H | -1.29183 | -4.64690 | -0.15644  |
| H | 0.04460  | -5.18759 | -1.17400  |
| H | 4.08298  | -0.87222 | 2.22883   |
| H | 5.59104  | -0.18182 | -0.34335  |
| H | 5.34311  | 0.88508  | 1.04720   |
| H | 3.97175  | 0.39421  | 0.04400   |
| H | 5.94646  | -2.47518 | 2.62976   |
| H | 6.52235  | -0.81642 | 2.50168   |
| H | 6.73772  | -1.93125 | 1.14494   |
| H | -3.72169 | 0.20481  | -4.96006  |
| H | -2.13918 | -0.46294 | -5.31483  |
| H | -5.08920 | 0.92618  | -6.68624  |
| H | -5.45687 | 1.43360  | -9.08332  |
| H | -3.52113 | 1.55760  | -10.63657 |
| H | -1.22624 | 1.14049  | -9.78091  |
| H | -0.87166 | 0.61425  | -7.39184  |
| H | -2.39643 | 2.94496  | -6.20928  |
| H | -1.96913 | 3.62925  | -4.66116  |
| H | -4.30702 | 4.32621  | -6.59155  |
| H | -6.66739 | 4.87457  | -6.08043  |
| H | -7.74991 | 3.94045  | -4.04737  |
| H | -6.45078 | 2.44482  | -2.54201  |
| H | -4.10129 | 1.91283  | -3.05555  |
| H | -0.45680 | -3.80979 | -4.39675  |

|   |          |          |          |
|---|----------|----------|----------|
| H | -2.68893 | -4.80818 | -4.02374 |
| H | -4.47456 | -3.44948 | -2.98108 |
| H | 0.47930  | -0.40919 | -3.24583 |
| H | 0.42843  | -1.74689 | -5.98660 |
| H | 1.65491  | -0.57604 | -5.46488 |
| H | -0.03262 | -0.08028 | -5.58671 |
| H | 1.33130  | -2.69679 | -2.41390 |
| H | 2.47760  | -1.77398 | -3.40193 |
| H | 1.59810  | -3.13383 | -4.09269 |
| H | -4.04285 | 0.11878  | -1.98913 |
| H | -5.46010 | -0.29878 | -3.98379 |
| H | -6.44291 | -0.23266 | -2.51863 |
| H | -6.06544 | -1.79391 | -3.25878 |
| H | -5.17265 | -2.51976 | -0.92250 |
| H | -5.49528 | -0.90658 | -0.27201 |
| H | -3.86650 | -1.60806 | -0.16700 |
| H | 2.14573  | 4.97735  | -4.30840 |
| H | 1.12590  | 7.05557  | -3.44171 |
| H | -1.10084 | 6.96689  | -2.35750 |
| H | 0.64164  | 1.59279  | -3.92833 |
| H | 0.04975  | 2.57805  | -6.12368 |
| H | 1.56675  | 1.67322  | -6.26696 |
| H | 1.59443  | 3.43934  | -6.17570 |
| H | 3.29686  | 3.07957  | -4.21000 |
| H | 3.04127  | 1.33293  | -4.23374 |
| H | 2.74353  | 2.25013  | -2.74980 |
| H | -3.07981 | 3.81716  | -2.05406 |
| H | -1.92316 | 4.38309  | 0.10186  |
| H | -3.57324 | 5.01477  | 0.07018  |
| H | -2.18767 | 6.08790  | -0.20376 |
| H | -3.35619 | 6.83744  | -2.41573 |
| H | -4.65566 | 5.66529  | -2.15966 |
| H | -3.71210 | 5.61774  | -3.65217 |
| H | 3.34191  | 2.73283  | 2.47745  |

|   |          |          |          |
|---|----------|----------|----------|
| H | 3.02985  | 1.05604  | 2.36827  |
| H | -1.10768 | -1.40261 | -0.74853 |
| H | -0.46613 | -1.80809 | 0.78196  |
| H | -2.00832 | -1.00776 | 0.71446  |
| H | 1.77289  | 2.21113  | 2.95384  |
| H | -4.39822 | 2.19367  | 0.93018  |
| H | -3.56600 | 2.45224  | -0.54468 |
| H | -3.83987 | 0.80474  | 0.07327  |

216

TS4

|   |          |          |          |
|---|----------|----------|----------|
| C | 3.25750  | 2.96440  | -1.81314 |
| C | 2.07004  | 3.06605  | -1.08156 |
| C | 0.88884  | 3.39839  | -1.74721 |
| C | 0.89203  | 3.62954  | -3.12175 |
| C | 2.08032  | 3.53379  | -3.84248 |
| C | 3.26443  | 3.19961  | -3.18463 |
| C | 2.06871  | 2.83102  | 0.40490  |
| N | 2.76120  | 3.90425  | 1.13399  |
| C | 2.38614  | 5.24089  | 0.68050  |
| C | 0.93301  | 5.56722  | 0.92505  |
| C | 0.23367  | 6.34986  | 0.00386  |
| C | -1.08548 | 6.72540  | 0.24734  |
| C | -1.72628 | 6.30971  | 1.41322  |
| C | -1.04159 | 5.51076  | 2.32752  |
| C | 0.27785  | 5.14043  | 2.08257  |
| C | 3.19129  | 3.73106  | 2.42548  |
| N | 3.13936  | 2.59356  | 3.13610  |
| C | 2.70013  | 1.29560  | 2.79979  |
| C | 3.56322  | 0.42067  | 2.09260  |
| C | 3.19708  | -0.91428 | 1.92865  |
| C | 1.99616  | -1.40159 | 2.43419  |
| C | 1.13976  | -0.53372 | 3.09652  |
| C | 1.46813  | 0.81167  | 3.28879  |
| C | 4.87541  | 0.92359  | 1.52701  |

|    |          |          |          |
|----|----------|----------|----------|
| C  | 5.20077  | 0.34878  | 0.14723  |
| C  | 0.47465  | 1.71346  | 3.98933  |
| C  | -0.79158 | 1.90543  | 3.14756  |
| N  | 3.67960  | 4.75410  | 3.17006  |
| Y  | 3.99598  | 3.63670  | 5.12834  |
| C  | 6.48818  | 3.47184  | 5.29316  |
| C  | 7.02460  | 2.37965  | 5.08213  |
| C  | 4.39042  | 5.91520  | 2.79771  |
| C  | 3.86113  | 7.17375  | 3.17171  |
| C  | 4.63303  | 8.31939  | 2.97485  |
| C  | 5.89861  | 8.24375  | 2.40585  |
| C  | 6.40670  | 7.00566  | 2.02808  |
| C  | 5.68181  | 5.82824  | 2.22282  |
| C  | 2.47568  | 7.28643  | 3.77375  |
| C  | 2.54355  | 7.62221  | 5.26544  |
| C  | 6.27560  | 4.49937  | 1.80060  |
| C  | 6.07499  | 4.28170  | 0.29619  |
| C  | 7.75274  | 4.35294  | 2.16921  |
| C  | 1.59479  | 8.29128  | 3.02725  |
| C  | 1.78982  | 4.28433  | 6.34475  |
| Al | 3.11601  | 4.59977  | 7.90983  |
| C  | 2.74255  | 6.28166  | 8.84574  |
| Y  | 5.56558  | 2.50362  | 7.83987  |
| C  | 3.93316  | 1.40855  | 6.26479  |
| Al | 6.69370  | 5.24331  | 6.65989  |
| C  | 5.84573  | 7.02163  | 6.82197  |
| O  | 4.69310  | 4.38703  | 7.06607  |
| C  | 2.92036  | 2.98030  | 9.11752  |
| C  | 7.29385  | 4.30300  | 8.42835  |
| N  | 5.92128  | 1.28049  | 9.79044  |
| C  | 6.86923  | 0.45870  | 9.27169  |
| N  | 7.62691  | -0.36690 | 10.06563 |
| C  | 7.97228  | 0.04147  | 11.43378 |
| C  | 9.27771  | 0.79777  | 11.48740 |

|   |          |          |          |
|---|----------|----------|----------|
| C | 10.42867 | 0.20671  | 12.01156 |
| C | 11.63101 | 0.91219  | 12.05687 |
| C | 11.69273 | 2.21903  | 11.57837 |
| C | 10.54894 | 2.81540  | 11.04536 |
| C | 9.35342  | 2.10617  | 10.99890 |
| N | 6.96995  | 0.58789  | 7.94223  |
| C | 7.80006  | -0.04763 | 6.99253  |
| C | 7.21556  | -1.04640 | 6.17200  |
| C | 7.92475  | -1.51420 | 5.06440  |
| C | 9.19243  | -1.02924 | 4.76048  |
| C | 9.78298  | -0.09747 | 5.60586  |
| C | 9.11714  | 0.39452  | 6.73210  |
| C | 5.87240  | -1.66151 | 6.51297  |
| C | 6.05860  | -3.01764 | 7.20697  |
| C | 9.82629  | 1.38710  | 7.62756  |
| C | 9.97685  | 2.74855  | 6.94666  |
| C | 8.39186  | 5.69508  | 5.69289  |
| C | 5.20002  | 1.06559  | 10.98565 |
| C | 5.16289  | 2.09911  | 11.95070 |
| C | 4.34047  | 1.96437  | 13.07055 |
| C | 3.57345  | 0.82479  | 13.26503 |
| C | 3.62444  | -0.19631 | 12.32220 |
| C | 4.41577  | -0.10063 | 11.17601 |
| C | 6.01480  | 3.34149  | 11.80532 |
| C | 6.92686  | 3.55891  | 13.01632 |
| C | 4.33333  | -1.19343 | 10.12531 |
| C | 3.26811  | -0.84169 | 9.08235  |
| C | 5.16640  | 4.58588  | 11.52829 |
| C | 4.04575  | -2.58042 | 10.70733 |
| C | 4.94721  | -1.81297 | 5.30298  |
| C | 11.20092 | 0.88009  | 8.07826  |
| C | 6.00730  | 0.64608  | 2.51559  |
| C | 0.11345  | 1.19215  | 5.38429  |
| C | 8.57622  | -1.31952 | 9.49975  |

|   |          |          |          |
|---|----------|----------|----------|
| C | 8.70376  | -2.56849 | 10.33156 |
| C | 9.96419  | -3.08793 | 10.63010 |
| C | 10.08760 | -4.26571 | 11.36596 |
| C | 8.94897  | -4.93037 | 11.81674 |
| C | 7.68649  | -4.41350 | 11.52507 |
| C | 7.56753  | -3.24115 | 10.78577 |
| H | 7.55416  | 1.47264  | 4.87315  |
| H | 1.80954  | 6.20521  | 9.42118  |
| H | 2.64203  | 7.14281  | 8.17715  |
| H | 3.53741  | 6.52369  | 9.56180  |
| H | 3.64326  | 2.21144  | 9.42853  |
| H | 2.08083  | 2.40202  | 8.70857  |
| H | 2.58548  | 3.37860  | 10.08375 |
| H | 6.60701  | 7.77679  | 7.05976  |
| H | 5.03349  | 7.10704  | 7.54903  |
| H | 5.44186  | 7.31062  | 5.84097  |
| H | 9.03292  | 4.88202  | 5.33947  |
| H | 9.00529  | 6.34708  | 6.33414  |
| H | 8.12142  | 6.30131  | 4.81660  |
| H | 8.03594  | -0.86332 | 12.04328 |
| H | 7.16349  | 0.64284  | 11.84074 |
| H | 10.37843 | -0.81270 | 12.38549 |
| H | 12.51880 | 0.44080  | 12.46868 |
| H | 12.62723 | 2.77106  | 11.61761 |
| H | 10.58659 | 3.83259  | 10.66642 |
| H | 8.46557  | 2.57331  | 10.58646 |
| H | 9.56142  | -0.85460 | 9.39550  |
| H | 8.24631  | -1.58926 | 8.49864  |
| H | 10.85218 | -2.56161 | 10.28887 |
| H | 11.07404 | -4.65980 | 11.59298 |
| H | 9.04423  | -5.84458 | 12.39519 |
| H | 6.79321  | -4.92409 | 11.87368 |
| H | 6.59116  | -2.82572 | 10.56728 |
| H | 4.31156  | 2.76586  | 13.80370 |



|   |          |          |          |
|---|----------|----------|----------|
| H | 2.94006  | 0.72911  | 14.14203 |
| H | 3.01756  | -1.08319 | 12.47260 |
| H | 6.65558  | 3.17706  | 10.93606 |
| H | 6.34850  | 3.78414  | 13.91856 |
| H | 7.60297  | 4.40114  | 12.83587 |
| H | 7.53930  | 2.67617  | 13.22021 |
| H | 4.55943  | 4.46884  | 10.62675 |
| H | 5.80055  | 5.46939  | 11.39776 |
| H | 4.47761  | 4.78477  | 12.35637 |
| H | 5.29636  | -1.24873 | 9.61049  |
| H | 2.28030  | -0.78487 | 9.55195  |
| H | 3.23083  | -1.59320 | 8.28641  |
| H | 3.46636  | 0.12527  | 8.62107  |
| H | 4.68444  | -2.80353 | 11.56714 |
| H | 4.21007  | -3.34837 | 9.94488  |
| H | 3.00484  | -2.67142 | 11.03474 |
| H | 7.47386  | -2.27174 | 4.43026  |
| H | 9.72328  | -1.39020 | 3.88455  |
| H | 10.78447 | 0.26301  | 5.38923  |
| H | 5.39148  | -0.99616 | 7.23489  |
| H | 6.57464  | -3.72443 | 6.54812  |
| H | 5.08592  | -3.44842 | 7.46850  |
| H | 6.64418  | -2.93559 | 8.12610  |
| H | 4.85210  | -0.88387 | 4.73938  |
| H | 3.94446  | -2.10914 | 5.62639  |
| H | 5.30702  | -2.58591 | 4.61530  |
| H | 9.21381  | 1.51970  | 8.52382  |
| H | 10.62734 | 2.67107  | 6.06846  |
| H | 10.42403 | 3.47662  | 7.63136  |
| H | 9.02013  | 3.14788  | 6.61105  |
| H | 11.15450 | -0.12607 | 8.50329  |
| H | 11.61222 | 1.54637  | 8.84043  |
| H | 11.90578 | 0.85080  | 7.24071  |
| H | 1.03499  | 2.74483  | 0.76006  |

|   |          |          |          |
|---|----------|----------|----------|
| H | 2.55930  | 1.88662  | 0.61854  |
| H | -0.03262 | 3.49264  | -1.17958 |
| H | -0.03349 | 3.88891  | -3.62764 |
| H | 2.08510  | 3.71659  | -4.91310 |
| H | 4.19337  | 3.11892  | -3.74175 |
| H | 4.17851  | 2.70845  | -1.29968 |
| H | 2.60433  | 5.30931  | -0.38791 |
| H | 3.01976  | 5.97768  | 1.17240  |
| H | 0.72934  | 6.66260  | -0.91173 |
| H | -1.61503 | 7.33793  | -0.47675 |
| H | -2.75503 | 6.60018  | 1.60469  |
| H | -1.53459 | 5.17330  | 3.23437  |
| H | 0.80297  | 4.51676  | 2.79892  |
| H | 3.86264  | -1.58444 | 1.39328  |
| H | 1.72742  | -2.44529 | 2.30090  |
| H | 0.18987  | -0.90319 | 3.47354  |
| H | 4.79247  | 2.00892  | 1.41816  |
| H | 5.43566  | -0.71951 | 0.19639  |
| H | 6.07965  | 0.85073  | -0.27055 |
| H | 4.36911  | 0.47578  | -0.55233 |
| H | 5.75123  | 1.03371  | 3.50296  |
| H | 6.94246  | 1.11749  | 2.19588  |
| H | 6.18009  | -0.43019 | 2.61669  |
| H | 0.94945  | 2.69327  | 4.10194  |
| H | -0.56441 | 2.34157  | 2.17144  |
| H | -1.49560 | 2.57244  | 3.65621  |
| H | -1.29722 | 0.94888  | 2.97857  |
| H | -0.43699 | 0.24756  | 5.32181  |
| H | -0.52146 | 1.91041  | 5.91355  |
| H | 1.00780  | 1.00964  | 5.98623  |
| H | 7.39922  | 6.94767  | 1.59196  |
| H | 6.49005  | 9.14320  | 2.26276  |
| H | 4.23380  | 9.28418  | 3.27475  |
| H | 5.73329  | 3.71219  | 2.33549  |

|   |         |         |          |
|---|---------|---------|----------|
| H | 5.02041 | 4.34954 | 0.02304  |
| H | 6.44818 | 3.29675 | -0.00730 |
| H | 6.62398 | 5.03911 | -0.27417 |
| H | 8.38576 | 5.02404 | 1.57895  |
| H | 8.08638 | 3.33011 | 1.96375  |
| H | 7.92115 | 4.55973 | 3.22642  |
| H | 2.00897 | 6.30275 | 3.66931  |
| H | 3.15545 | 6.90437 | 5.81660  |
| H | 1.54252 | 7.62802 | 5.71029  |
| H | 2.99485 | 8.60685 | 5.42659  |
| H | 1.96195 | 9.31608 | 3.14844  |
| H | 0.57133 | 8.25497 | 3.41386  |
| H | 1.55281 | 8.06907 | 1.95805  |
| H | 8.09498 | 5.03986 | 8.56592  |
| H | 7.83749 | 3.35199 | 8.55080  |
| H | 3.70396 | 1.10170 | 5.23064  |
| H | 4.53587 | 0.55357 | 6.60039  |
| H | 2.98088 | 1.32534 | 6.80469  |
| H | 6.63820 | 4.44603 | 9.30044  |
| H | 0.90891 | 4.61732 | 6.90985  |
| H | 1.74201 | 4.90905 | 5.43714  |
| H | 1.53643 | 3.25240 | 6.06480  |

216

Complex9

|   |          |         |          |
|---|----------|---------|----------|
| C | -2.03747 | 0.55401 | -7.82583 |
| C | -3.14062 | 0.65725 | -6.97249 |
| C | -4.38749 | 0.98000 | -7.51142 |
| C | -4.53254 | 1.19716 | -8.88049 |
| C | -3.42778 | 1.09793 | -9.72329 |
| C | -2.17855 | 0.77542 | -9.19241 |
| C | -2.98721 | 0.43924 | -5.49171 |
| N | -2.21433 | 1.51375 | -4.84953 |
| C | -2.62170 | 2.84525 | -5.29688 |
| C | -4.02808 | 3.21464 | -4.89083 |

|   |          |          |          |
|---|----------|----------|----------|
| C | -4.79506 | 4.03363  | -5.72293 |
| C | -6.06689 | 4.44935  | -5.33489 |
| C | -6.59411 | 4.03933  | -4.11129 |
| C | -5.84309 | 3.20618  | -3.28401 |
| C | -4.57101 | 2.79662  | -3.67355 |
| C | -1.74799 | 1.35901  | -3.56417 |
| N | -1.84728 | 0.25358  | -2.81119 |
| C | -2.27662 | -1.06106 | -3.10699 |
| C | -1.41694 | -1.95326 | -3.79780 |
| C | -1.74318 | -3.30841 | -3.85151 |
| C | -2.90713 | -3.80019 | -3.27299 |
| C | -3.78451 | -2.91084 | -2.66907 |
| C | -3.49721 | -1.54585 | -2.58270 |
| C | -0.17787 | -1.46809 | -4.52578 |
| C | -0.10610 | -2.01831 | -5.95521 |
| C | -4.53860 | -0.62445 | -1.98272 |
| C | -5.77803 | -0.53281 | -2.88119 |
| N | -1.17313 | 2.37768  | -2.87624 |
| Y | -0.91702 | 1.31777  | -0.85862 |
| C | 1.27958  | 0.32426  | -0.61678 |
| C | 2.28221  | -0.27043 | -1.00784 |
| C | -0.49362 | 3.50343  | -3.38438 |
| C | -0.95613 | 4.79011  | -3.02374 |
| C | -0.22842 | 5.90994  | -3.42470 |
| C | 0.93438  | 5.77916  | -4.17704 |
| C | 1.39324  | 4.51004  | -4.50982 |
| C | 0.71137  | 3.35961  | -4.10787 |
| C | -2.20541 | 4.94361  | -2.18421 |
| C | -1.83240 | 5.21165  | -0.72280 |
| C | 1.29081  | 1.99735  | -4.42716 |
| C | 1.16603  | 1.68888  | -5.92154 |
| C | 2.73935  | 1.85745  | -3.95045 |
| C | -3.16908 | 6.00525  | -2.71463 |
| C | -3.23174 | 1.97835  | 0.22198  |

|    |          |          |          |
|----|----------|----------|----------|
| Al | -2.12418 | 2.19117  | 1.94044  |
| C  | -2.53352 | 3.91604  | 2.78437  |
| Y  | 0.53169  | 0.05259  | 1.77454  |
| C  | -1.30671 | -0.87105 | 0.38618  |
| Al | 1.06381  | 3.12905  | 1.30528  |
| C  | 0.87010  | 4.73589  | 2.41869  |
| O  | -0.43005 | 2.06029  | 1.24499  |
| C  | -2.36023 | 0.61768  | 3.16032  |
| C  | 2.37590  | 1.88678  | 2.30173  |
| N  | 0.86482  | -1.12358 | 3.74764  |
| C  | 1.85233  | -1.92792 | 3.27869  |
| N  | 2.54107  | -2.79376 | 4.09355  |
| C  | 2.80990  | -2.41973 | 5.48679  |
| C  | 4.09533  | -1.64135 | 5.63177  |
| C  | 5.18441  | -2.17549 | 6.32227  |
| C  | 6.36353  | -1.44361 | 6.46369  |
| C  | 6.46284  | -0.16630 | 5.91715  |
| C  | 5.38101  | 0.37300  | 5.22019  |
| C  | 4.21047  | -0.36334 | 5.07559  |
| N  | 2.05462  | -1.74280 | 1.96886  |
| C  | 2.91967  | -2.38573 | 1.05951  |
| C  | 2.36352  | -3.39268 | 0.23183  |
| C  | 3.13390  | -3.92979 | -0.79903 |
| C  | 4.43491  | -3.49465 | -1.02766 |
| C  | 4.98025  | -2.52115 | -0.19906 |
| C  | 4.24837  | -1.95465 | 0.84911  |
| C  | 0.95930  | -3.91486 | 0.46121  |
| C  | 0.98377  | -5.33609 | 1.03581  |
| C  | 4.89719  | -0.86811 | 1.68224  |
| C  | 5.15009  | 0.39199  | 0.84377  |
| C  | 1.56098  | 3.50379  | -0.58520 |
| C  | 0.09454  | -1.31345 | 4.91516  |
| C  | 0.02989  | -0.25546 | 5.85138  |
| C  | -0.84450 | -0.34950 | 6.93464  |

|   |          |          |          |
|---|----------|----------|----------|
| C | -1.63610 | -1.47454 | 7.12034  |
| C | -1.55325 | -2.52196 | 6.20926  |
| C | -0.70658 | -2.46704 | 5.10033  |
| C | 0.90600  | 0.96885  | 5.70230  |
| C | 1.73580  | 1.24388  | 6.95890  |
| C | -0.74667 | -3.59012 | 4.08076  |
| C | -1.84619 | -3.32107 | 3.04866  |
| C | 0.10002  | 2.20230  | 5.29013  |
| C | -0.94777 | -4.97116 | 4.71041  |
| C | 0.10269  | -3.85272 | -0.80509 |
| C | 6.20776  | -1.32734 | 2.32944  |
| C | 1.10119  | -1.80600 | -3.76112 |
| C | -4.94990 | -1.03992 | -0.56664 |
| C | 3.52024  | -3.73279 | 3.54841  |
| C | 3.65500  | -4.96808 | 4.39794  |
| C | 4.90315  | -5.36840 | 4.87597  |
| C | 5.02823  | -6.52502 | 5.64505  |
| C | 3.90233  | -7.28774 | 5.94728  |
| C | 2.65138  | -6.89304 | 5.47124  |
| C | 2.53213  | -5.74224 | 4.69926  |
| H | 3.14502  | -0.80425 | -1.34724 |
| H | -3.60895 | 3.99530  | 2.99718  |
| H | -2.26033 | 4.78256  | 2.17397  |
| H | -2.01442 | 4.02709  | 3.74371  |
| H | -1.58179 | -0.13813 | 3.34810  |
| H | -3.22449 | 0.03089  | 2.82019  |
| H | -2.60106 | 0.98498  | 4.16559  |
| H | 1.84097  | 5.23232  | 2.55551  |
| H | 0.46340  | 4.53995  | 3.41595  |
| H | 0.20749  | 5.46910  | 1.94298  |
| H | 2.63471  | 3.29787  | -0.69371 |
| H | 1.40328  | 4.56104  | -0.83074 |
| H | 1.11615  | 2.94930  | -1.42254 |
| H | 2.85781  | -3.33924 | 6.07487  |

|   |          |          |          |
|---|----------|----------|----------|
| H | 1.97058  | -1.84274 | 5.86883  |
| H | 5.10476  | -3.17149 | 6.74987  |
| H | 7.20330  | -1.87153 | 7.00384  |
| H | 7.37864  | 0.40639  | 6.03097  |
| H | 5.44793  | 1.36665  | 4.78645  |
| H | 3.37346  | 0.05872  | 4.52996  |
| H | 4.49860  | -3.25267 | 3.44617  |
| H | 3.20354  | -4.02105 | 2.54840  |
| H | 5.77823  | -4.76448 | 4.65041  |
| H | 6.00503  | -6.82633 | 6.01252  |
| H | 3.99780  | -8.18558 | 6.55085  |
| H | 1.76860  | -7.48332 | 5.70011  |
| H | 1.56237  | -5.42478 | 4.33427  |
| H | -0.89784 | 0.47154  | 7.64437  |
| H | -2.31264 | -1.53845 | 7.96752  |
| H | -2.17757 | -3.39801 | 6.35379  |
| H | 1.60332  | 0.74679  | 4.89156  |
| H | 1.10282  | 1.52837  | 7.80607  |
| H | 2.43657  | 2.06563  | 6.77803  |
| H | 2.31764  | 0.36499  | 7.25068  |
| H | -0.41238 | 2.05072  | 4.33604  |
| H | 0.75117  | 3.07533  | 5.18495  |
| H | -0.66991 | 2.43785  | 6.03249  |
| H | 0.21083  | -3.60885 | 3.55397  |
| H | -2.83106 | -3.34237 | 3.52766  |
| H | -1.83318 | -4.07220 | 2.25133  |
| H | -1.73045 | -2.33994 | 2.58879  |
| H | -0.25921 | -5.14064 | 5.54315  |
| H | -0.78789 | -5.75319 | 3.96054  |
| H | -1.96741 | -5.09779 | 5.08855  |
| H | 2.70417  | -4.69852 | -1.43511 |
| H | 5.02124  | -3.91650 | -1.83876 |
| H | 5.99836  | -2.18307 | -0.37184 |
| H | 0.49803  | -3.26932 | 1.21403  |

|   |          |          |           |
|---|----------|----------|-----------|
| H | 1.44377  | -6.03681 | 0.33053   |
| H | -0.03462 | -5.68436 | 1.23956   |
| H | 1.55121  | -5.38984 | 1.96935   |
| H | 0.11011  | -2.85287 | -1.24138  |
| H | -0.93704 | -4.11406 | -0.58524  |
| H | 0.46184  | -4.55138 | -1.56818  |
| H | 4.20463  | -0.61109 | 2.48794   |
| H | 5.88313  | 0.19003  | 0.05466   |
| H | 5.54919  | 1.19470  | 1.47289   |
| H | 4.23590  | 0.75270  | 0.36682   |
| H | 6.05937  | -2.17112 | 3.00805   |
| H | 6.64198  | -0.51447 | 2.91686   |
| H | 6.94161  | -1.62752 | 1.57437   |
| H | -3.97901 | 0.36864  | -5.03212  |
| H | -2.48631 | -0.50787 | -5.31613  |
| H | -5.24308 | 1.07867  | -6.84916  |
| H | -5.50788 | 1.44904  | -9.28674  |
| H | -3.53831 | 1.26978  | -10.79003 |
| H | -1.31398 | 0.69325  | -9.84481  |
| H | -1.06561 | 0.30667  | -7.41164  |
| H | -2.53224 | 2.87378  | -6.38463  |
| H | -1.92252 | 3.58544  | -4.91291  |
| H | -4.39063 | 4.34282  | -6.68359  |
| H | -6.64935 | 5.08897  | -5.99190  |
| H | -7.58596 | 4.36136  | -3.80811  |
| H | -6.24459 | 2.87283  | -2.33146  |
| H | -3.99697 | 2.14733  | -3.02193  |
| H | -1.07043 | -3.99137 | -4.36185  |
| H | -3.13839 | -4.86033 | -3.31637  |
| H | -4.72016 | -3.27806 | -2.25626  |
| H | -0.24178 | -0.37942 | -4.59783  |
| H | 0.09963  | -3.09351 | -5.96163  |
| H | 0.70539  | -1.53211 | -6.50661  |
| H | -1.03754 | -1.85785 | -6.50587  |



|   |          |          |          |
|---|----------|----------|----------|
| H | 1.08340  | -1.37885 | -2.75850 |
| H | 1.97980  | -1.41209 | -4.28415 |
| H | 1.22160  | -2.89035 | -3.66584 |
| H | -4.09467 | 0.37323  | -1.93488 |
| H | -5.52818 | -0.17484 | -3.88302 |
| H | -6.51188 | 0.15888  | -2.45483 |
| H | -6.25639 | -1.51227 | -2.98644 |
| H | -5.48443 | -1.99559 | -0.57642 |
| H | -5.61859 | -0.29282 | -0.12648 |
| H | -4.08256 | -1.15465 | 0.08701  |
| H | 2.31530  | 4.40596  | -5.07524 |
| H | 1.48638  | 6.66051  | -4.49039 |
| H | -0.58025 | 6.89909  | -3.14578 |
| H | 0.70833  | 1.25365  | -3.87608 |
| H | 0.12515  | 1.76315  | -6.24519 |
| H | 1.52901  | 0.67937  | -6.14323 |
| H | 1.75693  | 2.39526  | -6.51502 |
| H | 3.40773  | 2.54568  | -4.47855 |
| H | 3.09764  | 0.83935  | -4.13575 |
| H | 2.81850  | 2.05569  | -2.87925 |
| H | -2.72927 | 3.98481  | -2.22986 |
| H | -1.17524 | 4.43384  | -0.31881 |
| H | -2.72336 | 5.25897  | -0.08944 |
| H | -1.28911 | 6.15763  | -0.62573 |
| H | -2.74523 | 7.01312  | -2.64916 |
| H | -4.09394 | 5.99709  | -2.12924 |
| H | -3.43324 | 5.81024  | -3.75751 |
| H | 3.23924  | 2.53535  | 2.09592  |
| H | 2.79966  | 0.89531  | 2.07832  |
| H | -1.63096 | -1.13057 | -0.63377 |
| H | -0.75566 | -1.78767 | 0.65283  |
| H | -2.21600 | -0.87760 | 0.99587  |
| H | 2.22886  | 1.94794  | 3.38735  |
| H | -4.20610 | 2.13561  | 0.70454  |

|   |          |         |          |
|---|----------|---------|----------|
| H | -3.19772 | 2.76408 | -0.54812 |
| H | -3.37387 | 1.01123 | -0.27798 |

24

PhSSPh without dispersion

|   |          |          |          |
|---|----------|----------|----------|
| S | 3.46152  | 7.43772  | 1.70859  |
| S | 3.97296  | 8.39967  | 3.49930  |
| C | 2.84192  | 8.74987  | 0.66737  |
| C | 5.59211  | 9.08422  | 3.18307  |
| C | 6.73383  | 8.27594  | 3.24050  |
| C | 7.99150  | 8.83681  | 3.03708  |
| C | 8.11724  | 10.20465 | 2.78833  |
| C | 6.98214  | 11.01202 | 2.73847  |
| C | 5.71863  | 10.45484 | 2.93119  |
| H | 6.62776  | 7.21453  | 3.44331  |
| H | 8.87617  | 8.20755  | 3.08076  |
| H | 9.10091  | 10.64035 | 2.63623  |
| H | 7.07803  | 12.07706 | 2.54598  |
| H | 4.82791  | 11.07418 | 2.89021  |
| C | 1.49959  | 9.13998  | 0.74164  |
| C | 1.01790  | 10.13280 | -0.10757 |
| C | 1.86895  | 10.73437 | -1.03563 |
| C | 3.20487  | 10.34331 | -1.11413 |
| C | 3.69447  | 9.35271  | -0.26442 |
| H | 0.84394  | 8.66308  | 1.46387  |
| H | -0.02436 | 10.43405 | -0.04856 |
| H | 1.48890  | 11.50592 | -1.69957 |
| H | 3.86800  | 10.80922 | -1.83783 |
| H | 4.73276  | 9.04025  | -0.31816 |

16

PhSMe without dispersion

|   |         |          |         |
|---|---------|----------|---------|
| S | 5.33066 | 11.04892 | 4.27685 |
| C | 6.94088 | 10.61100 | 3.67596 |
| C | 7.65107 | 9.66066  | 4.42596 |
| C | 8.92113 | 9.25939  | 4.02913 |

|   |          |          |         |
|---|----------|----------|---------|
| C | 9.50682  | 9.79451  | 2.88061 |
| C | 8.80392  | 10.73688 | 2.13588 |
| C | 7.52859  | 11.14752 | 2.52564 |
| H | 7.20271  | 9.23685  | 5.32088 |
| H | 9.45620  | 8.52220  | 4.62173 |
| H | 10.49914 | 9.47916  | 2.57211 |
| H | 9.24626  | 11.16310 | 1.23923 |
| H | 7.00422  | 11.88407 | 1.92663 |
| C | 4.72683  | 12.23432 | 3.05129 |
| H | 4.65486  | 11.78561 | 2.05715 |
| H | 5.34719  | 13.13365 | 3.01623 |
| H | 3.72425  | 12.51449 | 3.38207 |

238

int6 without dispersion

|   |          |          |          |
|---|----------|----------|----------|
| C | 3.43488  | -1.92423 | -3.70712 |
| C | 2.23296  | -2.68525 | -3.67339 |
| C | 1.43239  | -2.77160 | -4.84521 |
| C | 1.84917  | -2.09834 | -5.99800 |
| C | 3.02149  | -1.35377 | -6.03232 |
| C | 3.80479  | -1.27506 | -4.88720 |
| N | 1.80804  | -3.18689 | -2.42093 |
| C | 1.62093  | -4.44399 | -1.96237 |
| N | 2.07003  | -5.58340 | -2.59394 |
| C | 3.05310  | -5.55185 | -3.68533 |
| C | 4.35233  | -6.27971 | -3.40350 |
| C | 4.74818  | -7.34770 | -4.21484 |
| C | 5.98014  | -7.97277 | -4.02433 |
| C | 6.83562  | -7.53629 | -3.01513 |
| C | 6.45227  | -6.47100 | -2.20048 |
| C | 5.22124  | -5.84849 | -2.39515 |
| C | 0.12671  | -3.55330 | -4.90301 |
| C | -1.09549 | -2.62456 | -4.97113 |
| C | 4.32652  | -1.78331 | -2.48230 |
| C | 4.20884  | -0.37970 | -1.86821 |

|    |          |          |          |
|----|----------|----------|----------|
| Y  | 0.74715  | -2.10126 | -0.55820 |
| C  | 2.09188  | -1.38376 | 1.42489  |
| Al | 0.12297  | -1.53298 | 2.28439  |
| C  | 0.02494  | -3.20122 | 3.34383  |
| Y  | -1.23854 | 1.19015  | 1.60161  |
| C  | 0.03713  | 0.04627  | 3.60216  |
| Al | -1.70177 | -0.43826 | -0.99724 |
| C  | -3.21579 | -1.31866 | -1.92026 |
| N  | -1.66818 | 3.42049  | 2.53227  |
| C  | -0.87182 | 4.59277  | 2.59550  |
| C  | 0.08469  | 4.80043  | 3.62336  |
| C  | 0.87572  | 5.95386  | 3.60072  |
| C  | 0.77141  | 6.89587  | 2.58711  |
| C  | -0.12394 | 6.66449  | 1.55128  |
| C  | -0.93538 | 5.52764  | 1.52394  |
| C  | 0.34104  | 3.79356  | 4.73368  |
| C  | 1.75015  | 3.19230  | 4.59971  |
| C  | -1.85112 | 5.33295  | 0.32564  |
| C  | -1.04558 | 5.21583  | -0.97699 |
| N  | -3.25561 | 1.86561  | 2.74879  |
| C  | -4.55597 | 1.30018  | 2.69956  |
| C  | -5.53919 | 1.72259  | 1.75855  |
| C  | -6.74816 | 1.02529  | 1.66881  |
| C  | -7.02175 | -0.08222 | 2.45896  |
| C  | -6.07100 | -0.49007 | 3.38427  |
| C  | -4.85578 | 0.18317  | 3.53259  |
| C  | -5.36284 | 2.92274  | 0.84172  |
| C  | -5.58988 | 2.57106  | -0.63749 |
| C  | -3.90559 | -0.29515 | 4.61711  |
| C  | -3.31060 | -1.66546 | 4.27362  |
| C  | 0.89173  | 2.06881  | 0.87860  |
| C  | -1.07883 | -1.27566 | 0.70672  |
| C  | -2.09679 | 1.57624  | -0.80291 |
| N  | 0.93630  | -4.41642 | -0.78414 |

|   |          |          |          |
|---|----------|----------|----------|
| C | 0.68846  | -5.45716 | 0.15524  |
| C | 1.69700  | -5.92829 | 1.03735  |
| C | 1.36592  | -6.90094 | 1.98634  |
| C | 0.07768  | -7.40490 | 2.10008  |
| C | -0.91193 | -6.92123 | 1.25447  |
| C | -0.63801 | -5.95300 | 0.28494  |
| C | 3.12562  | -5.40325 | 1.03640  |
| C | 3.44859  | -4.67461 | 2.35155  |
| C | -1.78086 | -5.48098 | -0.60094 |
| C | -2.87989 | -4.79730 | 0.22391  |
| C | 0.00740  | -0.28775 | -2.21807 |
| C | -2.87411 | 3.13800  | 3.05649  |
| N | -3.64314 | 3.98894  | 3.83993  |
| C | -4.66218 | 3.47711  | 4.75779  |
| C | -4.24455 | 3.36644  | 6.21242  |
| C | -3.00290 | 2.84759  | 6.59072  |
| C | -2.67971 | 2.68132  | 7.93662  |
| C | -3.59698 | 3.02796  | 8.92758  |
| C | -4.83819 | 3.54654  | 8.56219  |
| C | -5.15451 | 3.71812  | 7.21577  |
| C | -3.20562 | 5.36256  | 4.15038  |
| C | -4.32480 | 6.31901  | 4.50762  |
| C | -4.40387 | 6.85324  | 5.79780  |
| C | -5.38554 | 7.78718  | 6.12780  |
| C | -6.30901 | 8.19905  | 5.16949  |
| C | -6.23902 | 7.67653  | 3.87804  |
| C | -5.25176 | 6.75001  | 3.55119  |
| C | 1.68425  | -6.94307 | -2.19608 |
| C | 1.22160  | -7.83149 | -3.33311 |
| C | 1.80228  | -9.09119 | -3.50999 |
| C | 1.33735  | -9.96133 | -4.49552 |
| C | 0.28573  | -9.57838 | -5.32546 |
| C | -0.29942 | -8.32328 | -5.15969 |
| C | 0.16311  | -7.45997 | -4.16887 |

|   |          |          |          |
|---|----------|----------|----------|
| C | 0.17122  | 4.39091  | 6.13733  |
| C | -2.89367 | 6.45255  | 0.19734  |
| C | -6.30909 | 4.06220  | 1.24588  |
| C | -4.57328 | -0.34644 | 5.99927  |
| C | 4.15719  | -6.51781 | 0.81251  |
| C | -2.37693 | -6.62676 | -1.43220 |
| C | 0.09385  | -4.52866 | -6.08939 |
| C | 5.79805  | -2.10676 | -2.77673 |
| H | 1.16820  | 1.74238  | -0.13855 |
| H | 0.88387  | 3.16804  | 0.84079  |
| H | 1.74888  | 1.80326  | 1.51659  |
| H | -1.99460 | -1.82651 | 0.99623  |
| H | -2.92378 | 1.94175  | -0.17384 |
| H | -1.25709 | 2.28379  | -0.72157 |
| H | -2.47735 | 1.72967  | -1.82031 |
| H | -0.51651 | 0.36336  | -2.93073 |
| H | 0.80123  | 0.36841  | -1.82083 |
| H | 0.48634  | -1.01472 | -2.89042 |
| H | -4.11666 | -1.28911 | -1.29248 |
| H | -3.02301 | -2.37715 | -2.13640 |
| H | -3.47792 | -0.84044 | -2.87346 |
| H | 2.52603  | -1.21358 | 2.41844  |
| H | 2.33696  | -0.45396 | 0.88193  |
| H | 2.74042  | -2.18886 | 1.03187  |
| H | -0.93398 | 0.21069  | 4.09750  |
| H | 0.65849  | -0.38824 | 4.39594  |
| H | 0.51006  | 1.02081  | 3.41334  |
| H | -0.95000 | -3.29870 | 3.83608  |
| H | 0.78133  | -3.22348 | 4.14093  |
| H | 0.16258  | -4.11036 | 2.74736  |
| H | -2.67838 | 5.75746  | 3.28493  |
| H | -2.48707 | 5.35017  | 4.97824  |
| H | -3.68992 | 6.53159  | 6.55148  |
| H | -5.42753 | 8.19137  | 7.13566  |

|   |          |          |          |
|---|----------|----------|----------|
| H | -7.07511 | 8.92624  | 5.42433  |
| H | -6.94865 | 7.99800  | 3.12037  |
| H | -5.19774 | 6.35695  | 2.54125  |
| H | -4.99176 | 2.50023  | 4.40831  |
| H | -5.53617 | 4.13372  | 4.69625  |
| H | -2.28542 | 2.56740  | 5.82480  |
| H | -1.70903 | 2.27740  | 8.21112  |
| H | -3.34509 | 2.89677  | 9.97631  |
| H | -5.55972 | 3.82505  | 9.32570  |
| H | -6.11959 | 4.13473  | 6.93661  |
| H | 1.59905  | 6.11123  | 4.39705  |
| H | 1.39209  | 7.78764  | 2.59425  |
| H | -0.19171 | 7.38120  | 0.73627  |
| H | -0.38430 | 2.98068  | 4.61743  |
| H | -0.83570 | 4.78282  | 6.30277  |
| H | 0.87999  | 5.20817  | 6.30899  |
| H | 0.36094  | 3.62952  | 6.90220  |
| H | 1.89761  | 2.38341  | 5.32457  |
| H | 2.51697  | 3.95190  | 4.78922  |
| H | 1.92352  | 2.79755  | 3.59512  |
| H | -2.38452 | 4.38940  | 0.47481  |
| H | -3.49057 | 6.56102  | 1.10709  |
| H | -3.57672 | 6.24951  | -0.63536 |
| H | -2.41706 | 7.42004  | 0.00338  |
| H | -0.28468 | 4.43353  | -0.91015 |
| H | -0.53084 | 6.15472  | -1.21042 |
| H | -1.70702 | 4.98269  | -1.81907 |
| H | -7.49216 | 1.35877  | 0.94973  |
| H | -7.96424 | -0.61369 | 2.36022  |
| H | -6.27886 | -1.34596 | 4.02146  |
| H | -4.33556 | 3.28565  | 0.95072  |
| H | -6.17527 | 4.34096  | 2.29310  |
| H | -7.35510 | 3.76410  | 1.11239  |
| H | -6.13679 | 4.94974  | 0.62585  |

|   |          |           |          |
|---|----------|-----------|----------|
| H | -5.31377 | 3.41674   | -1.27731 |
| H | -6.64367 | 2.34613   | -0.83474 |
| H | -5.00642 | 1.70096   | -0.94821 |
| H | -3.08940 | 0.43338   | 4.66996  |
| H | -5.01943 | 0.61305   | 6.27318  |
| H | -3.83437 | -0.60160  | 6.76667  |
| H | -5.36019 | -1.10785  | 6.03713  |
| H | -2.80856 | -1.65721  | 3.30155  |
| H | -4.09366 | -2.43109  | 4.22854  |
| H | -2.58372 | -1.97642  | 5.03178  |
| H | 0.88504  | -6.87813  | -1.46192 |
| H | 2.53140  | -7.42886  | -1.69818 |
| H | 2.62895  | -9.39104  | -2.87062 |
| H | 1.80032  | -10.93703 | -4.61578 |
| H | -0.07752 | -10.25305 | -6.09566 |
| H | -1.12261 | -8.01797  | -5.79987 |
| H | -0.30062 | -6.48645  | -4.04095 |
| H | 3.27882  | -4.51574  | -3.92364 |
| H | 2.59382  | -5.98910  | -4.57857 |
| H | 4.08304  | -7.69190  | -5.00277 |
| H | 6.27031  | -8.80029  | -4.66607 |
| H | 7.79713  | -8.01950  | -2.86546 |
| H | 7.11661  | -6.11986  | -1.41560 |
| H | 4.93255  | -5.01525  | -1.76011 |
| H | 2.13777  | -7.26100  | 2.66148  |
| H | -0.15496 | -8.15871  | 2.84704  |
| H | -1.92550 | -7.30264  | 1.34679  |
| H | 3.21926  | -4.68168  | 0.21562  |
| H | 4.00215  | -7.04544  | -0.13104 |
| H | 4.11835  | -7.25622  | 1.62032  |
| H | 5.17114  | -6.10368  | 0.79904  |
| H | 4.43793  | -4.20517  | 2.29997  |
| H | 3.46121  | -5.37808  | 3.19122  |
| H | 2.70904  | -3.90597  | 2.58382  |



|   |          |          |          |
|---|----------|----------|----------|
| H | -1.37195 | -4.73943 | -1.29608 |
| H | -1.62121 | -7.13595 | -2.03736 |
| H | -3.15107 | -6.24470 | -2.10730 |
| H | -2.84652 | -7.38094 | -0.79086 |
| H | -2.47279 | -3.97521 | 0.81705  |
| H | -3.35711 | -5.50520 | 0.91084  |
| H | -3.65828 | -4.39190 | -0.43117 |
| H | 1.23455  | -2.15707 | -6.89245 |
| H | 3.32442  | -0.84568 | -6.94379 |
| H | 4.72287  | -0.69422 | -4.90731 |
| H | 0.04545  | -4.14010 | -3.98174 |
| H | 0.94222  | -5.21825 | -6.08095 |
| H | 0.10791  | -3.99506 | -7.04548 |
| H | -0.82607 | -5.12270 | -6.06879 |
| H | -1.16478 | -1.97166 | -4.09882 |
| H | -2.01989 | -3.21045 | -5.02235 |
| H | -1.05337 | -1.98990 | -5.86352 |
| H | 3.97104  | -2.50903 | -1.74081 |
| H | 5.91223  | -3.09859 | -3.22355 |
| H | 6.38322  | -2.08034 | -1.85061 |
| H | 6.24469  | -1.37711 | -3.46041 |
| H | 3.17139  | -0.11596 | -1.63267 |
| H | 4.57123  | 0.38447  | -2.56412 |
| H | 4.79550  | -0.30270 | -0.94616 |
| S | 4.92466  | 3.13347  | -4.79656 |
| S | 5.84369  | 4.41635  | -3.48013 |
| C | 3.24934  | 3.74234  | -4.98713 |
| C | 6.65617  | 5.65538  | -4.48866 |
| C | 7.65833  | 6.39253  | -3.84714 |
| C | 8.31434  | 7.41114  | -4.53309 |
| C | 7.98832  | 7.69184  | -5.85952 |
| C | 6.99643  | 6.94755  | -6.49509 |
| C | 6.32379  | 5.93337  | -5.81491 |
| H | 7.92784  | 6.16667  | -2.81857 |

|   |          |         |          |
|---|----------|---------|----------|
| H | 9.09154  | 7.97917 | -4.02926 |
| H | 8.50693  | 8.48192 | -6.39459 |
| H | 6.73634  | 7.15643 | -7.52923 |
| H | 5.55328  | 5.35470 | -6.31553 |
| C | 2.87364  | 5.06886 | -4.77204 |
| C | 1.55305  | 5.45382 | -4.99692 |
| C | 0.61144  | 4.52969 | -5.44673 |
| C | 0.99398  | 3.20594 | -5.66008 |
| C | 2.30691  | 2.80452 | -5.42371 |
| H | 3.60233  | 5.79195 | -4.41848 |
| H | 1.26340  | 6.48633 | -4.82223 |
| H | -0.41483 | 4.83777 | -5.62397 |
| H | 0.26680  | 2.47399 | -6.00062 |
| H | 2.59191  | 1.76553 | -5.56649 |

238

TS5 without dispersion

|   |         |          |          |
|---|---------|----------|----------|
| C | 6.97363 | 5.39853  | 0.16423  |
| C | 5.59231 | 5.09968  | -0.01816 |
| C | 5.02822 | 5.26082  | -1.31252 |
| C | 5.85319 | 5.64888  | -2.37434 |
| C | 7.20559 | 5.90492  | -2.20325 |
| C | 7.74938 | 5.78842  | -0.93060 |
| N | 4.81208 | 4.77354  | 1.12577  |
| C | 4.53268 | 3.58741  | 1.70725  |
| N | 4.84313 | 2.34005  | 1.18821  |
| C | 5.65174 | 2.20860  | -0.04390 |
| C | 6.29371 | 0.85303  | -0.26069 |
| C | 5.76806 | -0.03255 | -1.20856 |
| C | 6.38816 | -1.25337 | -1.47027 |
| C | 7.54955 | -1.60867 | -0.78735 |
| C | 8.09195 | -0.73032 | 0.14984  |
| C | 7.47155 | 0.49090  | 0.40375  |
| C | 3.55240 | 5.06393  | -1.62224 |
| C | 2.91409 | 6.37356  | -2.11544 |

|    |          |          |         |
|----|----------|----------|---------|
| C  | 7.65876  | 5.30811  | 1.51872 |
| C  | 8.15200  | 6.68048  | 1.99050 |
| Y  | 3.59644  | 6.10809  | 2.77790 |
| C  | 5.27144  | 6.67096  | 4.62386 |
| Al | 3.49632  | 7.06002  | 5.67131 |
| C  | 3.66053  | 5.88618  | 7.25903 |
| Y  | 1.67585  | 9.37826  | 4.73122 |
| C  | 3.62629  | 9.02028  | 6.35590 |
| Al | 0.70530  | 7.10288  | 2.88748 |
| C  | -1.03305 | 6.15765  | 2.85011 |
| N  | 0.63056  | 11.38588 | 5.70910 |
| C  | 0.94181  | 12.77522 | 5.65058 |
| C  | 1.92416  | 13.36225 | 6.49161 |
| C  | 2.27239  | 14.70511 | 6.30599 |
| C  | 1.69047  | 15.48522 | 5.31762 |
| C  | 0.74325  | 14.90793 | 4.48308 |
| C  | 0.36309  | 13.57013 | 4.61708 |
| C  | 2.66284  | 12.59632 | 7.57919 |
| C  | 4.15210  | 12.44303 | 7.23178 |
| C  | -0.68973 | 13.03927 | 3.65217 |
| C  | -0.27838 | 13.19719 | 2.17998 |
| N  | -0.20378 | 9.37155  | 6.20827 |
| C  | -1.26109 | 8.43619  | 6.40773 |
| C  | -2.51577 | 8.58255  | 5.75268 |
| C  | -3.51542 | 7.62412  | 5.95426 |
| C  | -3.31561 | 6.52309  | 6.76832 |
| C  | -2.08138 | 6.36352  | 7.38570 |
| C  | -1.04201 | 7.28460  | 7.22468 |
| C  | -2.86234 | 9.73184  | 4.81748 |
| C  | -3.12218 | 9.24226  | 3.38486 |
| C  | 0.28464  | 7.02103  | 7.93197 |
| C  | 0.38731  | 5.61930  | 8.54227 |
| C  | 2.77347  | 11.60996 | 3.35551 |
| C  | 1.95835  | 6.93541  | 4.41815 |

|   |          |          |          |
|---|----------|----------|----------|
| C | 0.37913  | 9.12703  | 2.48506  |
| N | 3.85671  | 3.76056  | 2.88372  |
| C | 3.75099  | 2.82717  | 3.95381  |
| C | 4.89793  | 2.32217  | 4.63323  |
| C | 4.73269  | 1.39371  | 5.66511  |
| C | 3.47934  | 0.96149  | 6.07154  |
| C | 2.36070  | 1.50365  | 5.45645  |
| C | 2.46308  | 2.44131  | 4.42392  |
| C | 6.32535  | 2.74162  | 4.32037  |
| C | 6.99195  | 3.41721  | 5.53014  |
| C | 1.16235  | 2.99056  | 3.85919  |
| C | 0.25682  | 3.51616  | 4.98145  |
| C | 1.63564  | 6.43795  | 1.14668  |
| C | -0.26105 | 10.71319 | 6.46834  |
| N | -1.10022 | 11.28512 | 7.41283  |
| C | -1.77960 | 10.51353 | 8.45590  |
| C | -1.35473 | 10.79782 | 9.88327  |
| C | -0.05080 | 11.15552 | 10.23092 |
| C | 0.30518  | 11.35349 | 11.56513 |
| C | -0.63854 | 11.18231 | 12.57575 |
| C | -1.94155 | 10.81428 | 12.24066 |
| C | -2.29520 | 10.63125 | 10.90658 |
| C | -1.18928 | 12.75449 | 7.57321  |
| C | -2.45515 | 13.28731 | 8.21690  |
| C | -2.40434 | 13.83833 | 9.50231  |
| C | -3.53205 | 14.41805 | 10.08036 |
| C | -4.73632 | 14.45429 | 9.38075  |
| C | -4.80025 | 13.91731 | 8.09572  |
| C | -3.66717 | 13.34753 | 7.51902  |
| C | 4.07784  | 1.14179  | 1.53818  |
| C | 3.02827  | 0.70681  | 0.53365  |
| C | 2.75169  | -0.65793 | 0.38970  |
| C | 1.73959  | -1.09686 | -0.46018 |
| C | 0.99098  | -0.17491 | -1.19161 |

|   |          |          |          |
|---|----------|----------|----------|
| C | 1.26140  | 1.18552  | -1.06023 |
| C | 2.27018  | 1.62198  | -0.20071 |
| C | 2.54337  | 13.26465 | 8.95812  |
| C | -2.05128 | 13.71949 | 3.86397  |
| C | -4.08956 | 10.50966 | 5.31195  |
| C | 0.60803  | 8.04827  | 9.02209  |
| C | 7.17772  | 1.55034  | 3.86419  |
| C | 0.40809  | 1.94926  | 3.02050  |
| C | 3.30382  | 3.96828  | -2.67007 |
| C | 8.82246  | 4.30676  | 1.51551  |
| H | 3.08409  | 11.84050 | 2.34264  |
| H | 1.68977  | 11.43288 | 3.38103  |
| H | 3.07248  | 12.36093 | 4.08423  |
| H | 1.32356  | 6.25850  | 5.02105  |
| H | -0.25406 | 9.80732  | 3.07991  |
| H | 1.21292  | 9.70667  | 2.06842  |
| H | -0.25837 | 8.91629  | 1.61661  |
| H | 0.78519  | 6.73125  | 0.51773  |
| H | 2.48855  | 6.89923  | 0.62396  |
| H | 1.69569  | 5.34667  | 1.00357  |
| H | -1.60287 | 6.22910  | 3.78342  |
| H | -0.90335 | 5.09116  | 2.62733  |
| H | -1.67561 | 6.55691  | 2.05255  |
| H | 5.89483  | 6.92490  | 5.49014  |
| H | 5.70379  | 7.27743  | 3.81382  |
| H | 5.52676  | 5.61355  | 4.44040  |
| H | 2.86086  | 9.33782  | 7.08581  |
| H | 4.50535  | 8.83108  | 6.98549  |
| H | 3.94569  | 9.89340  | 5.76264  |
| H | 3.29383  | 6.35630  | 8.17883  |
| H | 4.71594  | 5.63872  | 7.43754  |
| H | 3.13200  | 4.93273  | 7.14623  |
| H | -1.09522 | 13.20525 | 6.58852  |
| H | -0.33851 | 13.11545 | 8.15970  |

|   |          |          |          |
|---|----------|----------|----------|
| H | -1.47141 | 13.80633 | 10.05802 |
| H | -3.46765 | 14.83947 | 11.07971 |
| H | -5.61733 | 14.90495 | 9.82957  |
| H | -5.73021 | 13.95261 | 7.53462  |
| H | -3.72505 | 12.95191 | 6.51122  |
| H | -1.63279 | 9.45408  | 8.25840  |
| H | -2.85818 | 10.69100 | 8.37859  |
| H | 0.69376  | 11.27762 | 9.45130  |
| H | 1.32410  | 11.63861 | 11.81292 |
| H | -0.36194 | 11.33435 | 13.61536 |
| H | -2.68751 | 10.67917 | 13.01933 |
| H | -3.31835 | 10.36309 | 10.65268 |
| H | 3.02656  | 15.14603 | 6.95265  |
| H | 1.97573  | 16.52632 | 5.19501  |
| H | 0.28687  | 15.50914 | 3.70074  |
| H | 2.22198  | 11.59461 | 7.64112  |
| H | 1.50527  | 13.43307 | 9.25676  |
| H | 3.04975  | 14.23561 | 8.97135  |
| H | 3.01971  | 12.64213 | 9.72402  |
| H | 4.65657  | 11.80529 | 7.96627  |
| H | 4.65111  | 13.41878 | 7.23962  |
| H | 4.30650  | 12.00637 | 6.24210  |
| H | -0.80936 | 11.97075 | 3.85744  |
| H | -2.40720 | 13.62350 | 4.89233  |
| H | -2.80692 | 13.28273 | 3.20142  |
| H | -1.99337 | 14.79020 | 3.63877  |
| H | 0.70077  | 12.75472 | 1.98162  |
| H | -0.22649 | 14.25308 | 1.89221  |
| H | -1.01472 | 12.71565 | 1.52682  |
| H | -4.47047 | 7.74696  | 5.44989  |
| H | -4.10403 | 5.79011  | 6.91542  |
| H | -1.92554 | 5.49316  | 8.01173  |
| H | -2.01480 | 10.42247 | 4.78835  |
| H | -3.97834 | 10.82422 | 6.35134  |

|   |          |          |          |
|---|----------|----------|----------|
| H | -4.99569 | 9.89731  | 5.24981  |
| H | -4.25768 | 11.39890 | 4.69392  |
| H | -3.28202 | 10.09286 | 2.71184  |
| H | -4.01974 | 8.61556  | 3.34217  |
| H | -2.29159 | 8.64766  | 3.00367  |
| H | 1.06854  | 7.10205  | 7.16775  |
| H | 0.66942  | 9.05742  | 8.61507  |
| H | 1.57252  | 7.81476  | 9.48704  |
| H | -0.15083 | 8.04206  | 9.81185  |
| H | 0.19019  | 4.82830  | 7.81330  |
| H | -0.31013 | 5.49524  | 9.37929  |
| H | 1.39416  | 5.46240  | 8.93557  |
| H | 3.59238  | 1.30035  | 2.49937  |
| H | 4.78328  | 0.31780  | 1.68735  |
| H | 3.34099  | -1.38270 | 0.94690  |
| H | 1.53996  | -2.16075 | -0.55681 |
| H | 0.20389  | -0.51448 | -1.85905 |
| H | 0.68337  | 1.91247  | -1.62407 |
| H | 2.46794  | 2.68469  | -0.09604 |
| H | 6.43905  | 2.95835  | -0.01203 |
| H | 5.03641  | 2.43596  | -0.92020 |
| H | 4.86244  | 0.23717  | -1.74444 |
| H | 5.96284  | -1.92512 | -2.21087 |
| H | 8.03521  | -2.55910 | -0.99094 |
| H | 9.00634  | -0.99021 | 0.67629  |
| H | 7.91331  | 1.17468  | 1.12113  |
| H | 5.61562  | 1.00531  | 6.16630  |
| H | 3.37532  | 0.22984  | 6.86793  |
| H | 1.37308  | 1.19251  | 5.78477  |
| H | 6.29866  | 3.46779  | 3.50288  |
| H | 6.72264  | 1.03604  | 3.01556  |
| H | 7.29684  | 0.81881  | 4.67111  |
| H | 8.18122  | 1.88042  | 3.57286  |
| H | 7.97675  | 3.81197  | 5.25500  |

|   |          |          |          |
|---|----------|----------|----------|
| H | 7.14075  | 2.70265  | 6.34702  |
| H | 6.38908  | 4.23977  | 5.92192  |
| H | 1.41012  | 3.83202  | 3.20256  |
| H | 0.99837  | 1.60074  | 2.17012  |
| H | -0.52447 | 2.37425  | 2.63213  |
| H | 0.14640  | 1.07522  | 3.62814  |
| H | 0.79628  | 4.20958  | 5.63142  |
| H | -0.12149 | 2.69899  | 5.60512  |
| H | -0.60919 | 4.03896  | 4.56928  |
| H | 5.41438  | 5.75891  | -3.36272 |
| H | 7.82536  | 6.19731  | -3.04663 |
| H | 8.80453  | 6.00177  | -0.77826 |
| H | 3.05622  | 4.77372  | -0.69084 |
| H | 3.67614  | 2.99029  | -2.35530 |
| H | 3.78539  | 4.21663  | -3.62204 |
| H | 2.23048  | 3.86598  | -2.86458 |
| H | 3.12981  | 7.21343  | -1.45129 |
| H | 1.82674  | 6.26500  | -2.19451 |
| H | 3.29268  | 6.64032  | -3.10843 |
| H | 6.91582  | 4.95801  | 2.24072  |
| H | 8.50653  | 3.31462  | 1.18166  |
| H | 9.24625  | 4.20854  | 2.52102  |
| H | 9.62948  | 4.63356  | 0.85033  |
| H | 7.34188  | 7.41455  | 2.02786  |
| H | 8.92470  | 7.07607  | 1.32239  |
| H | 8.58604  | 6.61110  | 2.99308  |
| S | 4.22745  | 8.80924  | 2.16332  |
| S | 5.18014  | 10.99365 | 3.61069  |
| C | 4.28138  | 9.33580  | 0.47584  |
| C | 6.79839  | 10.37280 | 3.26787  |
| C | 7.53621  | 9.76017  | 4.29682  |
| C | 8.90416  | 9.54717  | 4.15080  |
| C | 9.54773  | 9.91248  | 2.96758  |
| C | 8.81803  | 10.49463 | 1.92812  |



|   |          |          |          |
|---|----------|----------|----------|
| C | 7.45443  | 10.72548 | 2.07322  |
| H | 7.03096  | 9.48891  | 5.21851  |
| H | 9.47019  | 9.09880  | 4.96303  |
| H | 10.61619 | 9.74895  | 2.85685  |
| H | 9.31907  | 10.78601 | 1.00882  |
| H | 6.88774  | 11.20608 | 1.28229  |
| C | 3.28778  | 10.17031 | -0.06441 |
| C | 3.38375  | 10.62546 | -1.37656 |
| C | 4.47082  | 10.26157 | -2.17199 |
| C | 5.45779  | 9.42808  | -1.64695 |
| C | 5.36783  | 8.96549  | -0.33627 |
| H | 2.44082  | 10.46194 | 0.54594  |
| H | 2.60488  | 11.26876 | -1.77745 |
| H | 4.54402  | 10.62062 | -3.19474 |
| H | 6.30076  | 9.12249  | -2.25973 |
| H | 6.13256  | 8.30637  | 0.06029  |

238

int7 without dispersion

|   |         |          |          |
|---|---------|----------|----------|
| C | 3.52179 | -1.46594 | -2.99663 |
| C | 2.35335 | -2.21376 | -3.32018 |
| C | 1.82516 | -2.12184 | -4.63644 |
| C | 2.47903 | -1.32290 | -5.58056 |
| C | 3.62475 | -0.60549 | -5.26969 |
| C | 4.13107 | -0.68216 | -3.97945 |
| N | 1.68663 | -2.92812 | -2.28626 |
| C | 1.61648 | -4.25304 | -2.02711 |
| N | 2.35039 | -5.23110 | -2.67232 |
| C | 3.46720 | -4.93178 | -3.57748 |
| C | 4.72922 | -5.72981 | -3.31950 |
| C | 5.31941 | -6.45811 | -4.35711 |
| C | 6.52564 | -7.13033 | -4.16276 |
| C | 7.15602 | -7.09001 | -2.92074 |
| C | 6.57538 | -6.36864 | -1.87790 |
| C | 5.37469 | -5.69123 | -2.07941 |

|    |          |          |          |
|----|----------|----------|----------|
| C  | 0.55664  | -2.83114 | -5.08715 |
| C  | -0.52297 | -1.82317 | -5.51398 |
| C  | 4.16504  | -1.49751 | -1.61818 |
| C  | 4.12868  | -0.11538 | -0.94942 |
| Y  | 0.01893  | -2.27073 | -0.65193 |
| C  | 1.65145  | -1.82444 | 1.29091  |
| Al | -0.15593 | -1.60280 | 2.32437  |
| C  | -0.12490 | -2.75655 | 3.93374  |
| Y  | -1.83392 | 0.72840  | 1.20328  |
| C  | 0.05732  | 0.36246  | 2.95812  |
| Al | -2.97025 | -1.55404 | -0.44082 |
| C  | -4.74424 | -2.41266 | -0.23750 |
| N  | -1.91708 | 3.13886  | 1.66818  |
| C  | -1.22450 | 4.29503  | 1.20526  |
| C  | 0.04857  | 4.67617  | 1.70694  |
| C  | 0.68397  | 5.80628  | 1.18028  |
| C  | 0.11784  | 6.56140  | 0.16306  |
| C  | -1.09790 | 6.15428  | -0.36920 |
| C  | -1.77305 | 5.03174  | 0.11639  |
| C  | 0.79736  | 3.89283  | 2.77197  |
| C  | 2.05104  | 3.23849  | 2.16694  |
| C  | -3.08143 | 4.65407  | -0.55967 |
| C  | -2.87512 | 4.33738  | -2.04680 |
| N  | -3.42487 | 1.74765  | 2.59253  |
| C  | -4.71384 | 1.34187  | 3.03447  |
| C  | -5.91445 | 1.94330  | 2.55274  |
| C  | -7.14925 | 1.48265  | 3.01969  |
| C  | -7.25391 | 0.44131  | 3.92885  |
| C  | -6.09031 | -0.18104 | 4.35477  |
| C  | -4.82759 | 0.22724  | 3.91566  |
| C  | -5.95990 | 3.06435  | 1.52544  |
| C  | -6.65505 | 2.61300  | 0.23030  |
| C  | -3.63521 | -0.56445 | 4.42970  |
| C  | -3.82111 | -2.06972 | 4.18721  |

|   |          |          |          |
|---|----------|----------|----------|
| C | 3.82861  | 6.61121  | -1.79380 |
| C | -1.66376 | -1.73074 | 1.04167  |
| C | -3.49281 | 0.46602  | -0.70876 |
| N | 0.71368  | -4.50457 | -1.03257 |
| C | 0.47734  | -5.68927 | -0.27334 |
| C | 1.35561  | -6.13340 | 0.75383  |
| C | 0.97543  | -7.21472 | 1.55698  |
| C | -0.23210 | -7.87474 | 1.38491  |
| C | -1.07876 | -7.45864 | 0.36739  |
| C | -0.74709 | -6.39025 | -0.46883 |
| C | 2.70917  | -5.50617 | 1.04969  |
| C | 2.75302  | -4.90401 | 2.46282  |
| C | -1.72506 | -6.03185 | -1.57479 |
| C | -3.01022 | -5.43817 | -0.98768 |
| C | -2.06174 | -2.13674 | -2.22577 |
| C | -2.89805 | 3.01157  | 2.58781  |
| N | -3.30530 | 3.98630  | 3.48471  |
| C | -3.91089 | 3.62471  | 4.76827  |
| C | -2.96525 | 3.57096  | 5.95315  |
| C | -1.62923 | 3.18139  | 5.83101  |
| C | -0.81140 | 3.07432  | 6.95639  |
| C | -1.32144 | 3.34939  | 8.22344  |
| C | -2.65442 | 3.73805  | 8.35680  |
| C | -3.46500 | 3.85307  | 7.23018  |
| C | -2.71675 | 5.34299  | 3.45800  |
| C | -3.51054 | 6.40162  | 4.19511  |
| C | -3.05547 | 6.89375  | 5.42350  |
| C | -3.73673 | 7.91584  | 6.08282  |
| C | -4.88828 | 8.46364  | 5.52166  |
| C | -5.34750 | 7.98935  | 4.29322  |
| C | -4.65971 | 6.97236  | 3.63515  |
| C | 2.03251  | -6.66261 | -2.60050 |
| C | 1.76368  | -7.33125 | -3.93450 |
| C | 2.50305  | -8.45718 | -4.31072 |

|   |          |          |          |
|---|----------|----------|----------|
| C | 2.21488  | -9.14139 | -5.49088 |
| C | 1.18229  | -8.70323 | -6.31741 |
| C | 0.43911  | -7.58061 | -5.95362 |
| C | 0.72695  | -6.90345 | -4.77027 |
| C | 1.19634  | 4.74160  | 3.98776  |
| C | -4.14600 | 5.74755  | -0.39852 |
| C | -6.66489 | 4.30960  | 2.08025  |
| C | -3.36188 | -0.29036 | 5.91552  |
| C | 3.84870  | -6.52715 | 0.90793  |
| C | -2.06180 | -7.22882 | -2.47637 |
| C | 0.81668  | -3.79901 | -6.25043 |
| C | 5.61267  | -2.00990 | -1.66832 |
| H | 3.84601  | 6.42029  | -2.87000 |
| H | 2.90479  | 6.20177  | -1.37849 |
| H | 3.85295  | 7.68742  | -1.60302 |
| H | -2.26628 | -2.43300 | 1.64976  |
| H | -4.22346 | 0.86001  | 0.01481  |
| H | -2.86459 | 1.30778  | -1.04741 |
| H | -4.10231 | 0.24502  | -1.59492 |
| H | -2.93142 | -1.92336 | -2.86170 |
| H | -1.25107 | -1.60475 | -2.74966 |
| H | -1.89571 | -3.21532 | -2.37204 |
| H | -5.39479 | -1.77890 | 0.38012  |
| H | -4.71246 | -3.39480 | 0.24636  |
| H | -5.25949 | -2.54825 | -1.19826 |
| H | 2.24082  | -1.75339 | 2.21420  |
| H | 2.02078  | -0.99364 | 0.67440  |
| H | 2.01717  | -2.76550 | 0.84966  |
| H | -0.70731 | 0.85186  | 3.58423  |
| H | 0.84574  | 0.11328  | 3.68098  |
| H | 0.52854  | 1.12440  | 2.32255  |
| H | -0.73289 | -2.33936 | 4.74584  |
| H | 0.89250  | -2.85580 | 4.33602  |
| H | -0.49411 | -3.77239 | 3.74707  |

|   |          |          |          |
|---|----------|----------|----------|
| H | -2.61616 | 5.64948  | 2.41898  |
| H | -1.70680 | 5.31709  | 3.88115  |
| H | -2.15892 | 6.47045  | 5.86802  |
| H | -3.36449 | 8.28413  | 7.03489  |
| H | -5.42036 | 9.26124  | 6.03290  |
| H | -6.23644 | 8.41973  | 3.84003  |
| H | -5.01555 | 6.62356  | 2.67099  |
| H | -4.39991 | 2.65723  | 4.66962  |
| H | -4.70467 | 4.34688  | 4.98404  |
| H | -1.22401 | 2.96102  | 4.84800  |
| H | 0.22592  | 2.77268  | 6.84022  |
| H | -0.68534 | 3.26385  | 9.09998  |
| H | -3.06218 | 3.95963  | 9.33947  |
| H | -4.49994 | 4.16936  | 7.33995  |
| H | 1.64921  | 6.09923  | 1.58542  |
| H | 0.61954  | 7.44821  | -0.21465 |
| H | -1.53896 | 6.71880  | -1.18684 |
| H | 0.13618  | 3.09512  | 3.12226  |
| H | 0.33256  | 5.20425  | 4.47354  |
| H | 1.88958  | 5.54262  | 3.71016  |
| H | 1.70266  | 4.11839  | 4.73303  |
| H | 2.54837  | 2.59674  | 2.90307  |
| H | 2.77246  | 4.00022  | 1.85082  |
| H | 1.80788  | 2.63147  | 1.28908  |
| H | -3.45077 | 3.74452  | -0.07778 |
| H | -4.33869 | 5.97332  | 0.65371  |
| H | -5.09127 | 5.43801  | -0.85738 |
| H | -3.83431 | 6.67944  | -0.88308 |
| H | -2.10907 | 3.57265  | -2.19432 |
| H | -2.56287 | 5.22688  | -2.60528 |
| H | -3.80915 | 3.97864  | -2.49417 |
| H | -8.05575 | 1.95441  | 2.64949  |
| H | -8.22499 | 0.10871  | 4.28459  |
| H | -6.15831 | -1.01450 | 5.04808  |

|   |          |           |          |
|---|----------|-----------|----------|
| H | -4.93521 | 3.34404   | 1.27124  |
| H | -6.20030 | 4.65329   | 3.00701  |
| H | -7.72000 | 4.10655   | 2.29321  |
| H | -6.63250 | 5.12754   | 1.35252  |
| H | -6.63426 | 3.41567   | -0.51541 |
| H | -7.70489 | 2.36018   | 0.41378  |
| H | -6.17627 | 1.73308   | -0.20672 |
| H | -2.74854 | -0.24259  | 3.87235  |
| H | -3.16814 | 0.76855   | 6.10465  |
| H | -2.49055 | -0.85980  | 6.25795  |
| H | -4.21835 | -0.59087  | 6.52991  |
| H | -4.06448 | -2.27883  | 3.14175  |
| H | -4.62819 | -2.47731  | 4.80538  |
| H | -2.90913 | -2.61559  | 4.44255  |
| H | 1.16242  | -6.79728  | -1.96341 |
| H | 2.86312  | -7.18619  | -2.11399 |
| H | 3.31401  | -8.79865  | -3.67243 |
| H | 2.79983  | -10.01535 | -5.76455 |
| H | 0.95551  | -9.23338  | -7.23829 |
| H | -0.37095 | -7.23452  | -6.58979 |
| H | 0.13846  | -6.03509  | -4.48765 |
| H | 3.70573  | -3.87437  | -3.49793 |
| H | 3.15232  | -5.10707  | -4.61271 |
| H | 4.82660  | -6.50062  | -5.32517 |
| H | 6.96984  | -7.68887  | -4.98229 |
| H | 8.09444  | -7.61524  | -2.76586 |
| H | 7.06128  | -6.32788  | -0.90682 |
| H | 4.93135  | -5.12310  | -1.26745 |
| H | 1.64725  | -7.54258  | 2.34596  |
| H | -0.50541 | -8.70543  | 2.02954  |
| H | -2.02123 | -7.97694  | 0.21180  |
| H | 2.87894  | -4.70273  | 0.32340  |
| H | 3.87192  | -6.98927  | -0.08138 |
| H | 3.74847  | -7.32918  | 1.64667  |

|   |          |          |          |
|---|----------|----------|----------|
| H | 4.81818  | -6.04652 | 1.08142  |
| H | 3.68459  | -4.34744 | 2.61682  |
| H | 2.71274  | -5.69353 | 3.22124  |
| H | 1.91376  | -4.23187 | 2.64750  |
| H | -1.24304 | -5.26963 | -2.19767 |
| H | -1.16588 | -7.69091 | -2.89975 |
| H | -2.70094 | -6.90789 | -3.30675 |
| H | -2.60919 | -8.00260 | -1.92754 |
| H | -2.79786 | -4.58747 | -0.33468 |
| H | -3.54158 | -6.18406 | -0.38569 |
| H | -3.69060 | -5.10071 | -1.77704 |
| H | 2.06936  | -1.25693 | -6.58527 |
| H | 4.11268  | 0.00999  | -6.02033 |
| H | 5.02516  | -0.11948 | -3.72364 |
| H | 0.16954  | -3.40570 | -4.23754 |
| H | 1.55627  | -4.56226 | -6.00003 |
| H | 1.17909  | -3.26094 | -7.13298 |
| H | -0.10891 | -4.31027 | -6.53848 |
| H | -0.67892 | -1.04732 | -4.76176 |
| H | -1.47723 | -2.33093 | -5.69482 |
| H | -0.23603 | -1.31735 | -6.44268 |
| H | 3.58339  | -2.18890 | -0.99970 |
| H | 5.68983  | -2.98671 | -2.15316 |
| H | 6.01938  | -2.10088 | -0.65446 |
| H | 6.26079  | -1.31838 | -2.21798 |
| H | 3.11044  | 0.28041  | -0.89680 |
| H | 4.73786  | 0.60621  | -1.50560 |
| H | 4.53109  | -0.17028 | 0.06864  |
| S | 0.20008  | 0.58296  | -0.74870 |
| S | 5.17216  | 5.75178  | -0.94131 |
| C | 0.09275  | 1.48884  | -2.28415 |
| C | 6.63672  | 6.45420  | -1.65312 |
| C | 7.86183  | 5.96237  | -1.17630 |
| C | 9.06021  | 6.45582  | -1.67819 |

|   |          |         |          |
|---|----------|---------|----------|
| C | 9.06228  | 7.44584 | -2.66227 |
| C | 7.84847  | 7.93456 | -3.13630 |
| C | 6.63943  | 7.44647 | -2.63927 |
| H | 7.87081  | 5.19093 | -0.41056 |
| H | 9.99917  | 6.06313 | -1.29726 |
| H | 9.99981  | 7.82989 | -3.05326 |
| H | 7.83319  | 8.70543 | -3.90237 |
| H | 5.70837  | 7.84566 | -3.02675 |
| C | -0.93617 | 1.29458 | -3.21385 |
| C | -0.95333 | 2.01658 | -4.40774 |
| C | 0.04892  | 2.94272 | -4.68778 |
| C | 1.07131  | 3.14410 | -3.76097 |
| C | 1.09598  | 2.42578 | -2.56783 |
| H | -1.72761 | 0.58470 | -3.00095 |
| H | -1.75897 | 1.85149 | -5.11829 |
| H | 0.03391  | 3.50206 | -5.61882 |
| H | 1.86079  | 3.86173 | -3.96690 |
| H | 1.89580  | 2.58231 | -1.85137 |

222

Complex 3 without dispersion

|   |         |          |          |
|---|---------|----------|----------|
| C | 6.94062 | 6.21827  | 0.90250  |
| C | 5.68706 | 5.68615  | 0.48009  |
| C | 5.25161 | 5.94099  | -0.85019 |
| C | 6.09640 | 6.64188  | -1.71981 |
| C | 7.33731 | 7.11745  | -1.32108 |
| C | 7.74083 | 6.91092  | -0.00882 |
| N | 4.87630 | 5.04039  | 1.45376  |
| C | 4.74484 | 3.73699  | 1.78586  |
| N | 5.30634 | 2.66874  | 1.10484  |
| C | 6.26384 | 2.89294  | -0.00080 |
| C | 7.14607 | 1.71327  | -0.35531 |
| C | 6.83213 | 0.89961  | -1.45057 |
| C | 7.67005 | -0.14766 | -1.82915 |
| C | 8.84447 | -0.39480 | -1.12086 |



|    |          |          |          |
|----|----------|----------|----------|
| C  | 9.18013  | 0.41962  | -0.04040 |
| C  | 8.34031  | 1.46711  | 0.33242  |
| C  | 3.89157  | 5.52549  | -1.39618 |
| C  | 3.05759  | 6.75185  | -1.80479 |
| C  | 7.45553  | 6.06877  | 2.32659  |
| C  | 7.62682  | 7.43310  | 3.01141  |
| Y  | 3.35540  | 5.85133  | 3.18758  |
| C  | 4.72030  | 5.98341  | 5.34460  |
| Al | 2.79591  | 6.16643  | 6.14908  |
| C  | 2.70703  | 4.66078  | 7.43220  |
| Y  | 1.29884  | 8.66231  | 5.10042  |
| C  | 2.92319  | 8.03853  | 7.05888  |
| Al | 0.40368  | 6.63121  | 3.03125  |
| C  | -1.32226 | 5.70434  | 2.75374  |
| N  | 0.85794  | 11.04278 | 5.53906  |
| C  | 1.51272  | 12.24738 | 5.16540  |
| C  | 2.74118  | 12.63216 | 5.76536  |
| C  | 3.41307  | 13.76318 | 5.28801  |
| C  | 2.91695  | 14.52316 | 4.23879  |
| C  | 1.72370  | 14.13791 | 3.64088  |
| C  | 1.01419  | 13.01336 | 4.07063  |
| C  | 3.38723  | 11.86432 | 6.90783  |
| C  | 4.74618  | 11.27886 | 6.49107  |
| C  | -0.27666 | 12.66925 | 3.34095  |
| C  | -0.02143 | 12.30119 | 1.87208  |
| N  | -0.47311 | 9.47608  | 6.43429  |
| C  | -1.70875 | 8.86733  | 6.80833  |
| C  | -2.88361 | 9.01793  | 6.02137  |
| C  | -4.02920 | 8.28541  | 6.34924  |
| C  | -4.05580 | 7.40265  | 7.41915  |
| C  | -2.91665 | 7.26871  | 8.20011  |
| C  | -1.75160 | 7.99130  | 7.92942  |
| C  | -2.98043 | 9.95841  | 4.83268  |
| C  | -3.37215 | 9.22651  | 3.54068  |

|   |          |          |          |
|---|----------|----------|----------|
| C | -0.57474 | 7.81395  | 8.87262  |
| C | 0.03962  | 6.42096  | 8.71296  |
| S | 3.71962  | 8.67301  | 3.54999  |
| C | 1.45488  | 6.25995  | 4.67784  |
| C | 0.12549  | 8.69546  | 2.82700  |
| N | 3.94474  | 3.58436  | 2.88178  |
| C | 3.88019  | 2.46981  | 3.76230  |
| C | 5.01944  | 1.98652  | 4.47166  |
| C | 4.87771  | 0.88702  | 5.32409  |
| C | 3.65569  | 0.26293  | 5.52577  |
| C | 2.53661  | 0.77203  | 4.88332  |
| C | 2.61420  | 1.86937  | 4.02098  |
| C | 6.41139  | 2.59630  | 4.37665  |
| C | 6.93007  | 3.05385  | 5.75101  |
| C | 1.31403  | 2.35222  | 3.39552  |
| C | 0.25103  | 2.62808  | 4.46911  |
| C | 1.58041  | 6.27380  | 1.36033  |
| C | -0.15530 | 10.80636 | 6.39663  |
| N | -0.78745 | 11.75263 | 7.18665  |
| C | -1.48190 | 11.38297 | 8.42373  |
| C | -0.70645 | 11.64052 | 9.70142  |
| C | 0.64776  | 11.31493 | 9.82389  |
| C | 1.31561  | 11.48785 | 11.03520 |
| C | 0.63646  | 11.98519 | 12.14661 |
| C | -0.71324 | 12.31495 | 12.03543 |
| C | -1.37512 | 12.14938 | 10.82011 |
| C | -0.41357 | 13.17805 | 7.14037  |
| C | -1.48826 | 14.12999 | 7.62362  |
| C | -1.22386 | 14.98746 | 8.69582  |
| C | -2.16899 | 15.92350 | 9.11449  |
| C | -3.40108 | 16.00882 | 8.47019  |
| C | -3.67807 | 15.15750 | 7.40056  |
| C | -2.72716 | 14.23120 | 6.97877  |
| C | 4.71576  | 1.32984  | 1.14933  |

|   |          |          |          |
|---|----------|----------|----------|
| C | 3.81753  | 0.94965  | -0.01211 |
| C | 3.78933  | -0.38336 | -0.43962 |
| C | 2.91342  | -0.79527 | -1.44111 |
| C | 2.05350  | 0.12480  | -2.04048 |
| C | 2.07593  | 1.45470  | -1.62560 |
| C | 2.94944  | 1.86156  | -0.61675 |
| C | 3.55921  | 12.73071 | 8.16403  |
| C | -1.30212 | 13.81186 | 3.40610  |
| C | -3.97511 | 11.09345 | 5.11460  |
| C | -0.94785 | 8.06022  | 10.34165 |
| C | 7.41820  | 1.61394  | 3.76404  |
| C | 0.77035  | 1.35768  | 2.35992  |
| C | 3.99049  | 4.58366  | -2.60653 |
| C | 8.76903  | 5.27616  | 2.38620  |
| C | 3.86065  | 9.72634  | 2.11865  |
| H | 0.76599  | 5.49532  | 5.08354  |
| H | -0.52728 | 9.33053  | 3.44706  |
| H | 0.98559  | 9.30400  | 2.50733  |
| H | -0.46686 | 8.57413  | 1.91103  |
| H | 0.78108  | 6.53204  | 0.65376  |
| H | 2.40789  | 6.92899  | 1.04247  |
| H | 1.84017  | 5.23862  | 1.08414  |
| H | -1.93612 | 5.66491  | 3.66200  |
| H | -1.17907 | 4.66886  | 2.42008  |
| H | -1.92817 | 6.19719  | 1.98093  |
| H | 5.17493  | 6.01984  | 6.34346  |
| H | 5.25132  | 6.77352  | 4.79302  |
| H | 5.04246  | 5.00280  | 4.96151  |
| H | 2.06918  | 8.48292  | 7.59692  |
| H | 3.57392  | 7.69577  | 7.87459  |
| H | 3.50621  | 8.84724  | 6.59287  |
| H | 3.24068  | 3.79797  | 7.01202  |
| H | 1.69383  | 4.31870  | 7.66668  |
| H | 3.19294  | 4.89641  | 8.38910  |

|   |          |          |          |
|---|----------|----------|----------|
| H | -0.16244 | 13.43560 | 6.11466  |
| H | 0.49004  | 13.34771 | 7.73792  |
| H | -0.26928 | 14.91747 | 9.21082  |
| H | -1.94206 | 16.58217 | 9.94836  |
| H | -4.14060 | 16.73487 | 8.79650  |
| H | -4.63426 | 15.21922 | 6.88791  |
| H | -2.94762 | 13.57836 | 6.14053  |
| H | -1.75267 | 10.33082 | 8.37569  |
| H | -2.42360 | 11.93890 | 8.46501  |
| H | 1.18392  | 10.92112 | 8.96477  |
| H | 2.36862  | 11.23087 | 11.11090 |
| H | 1.15670  | 12.11738 | 13.09120 |
| H | -1.25119 | 12.70956 | 12.89322 |
| H | -2.42441 | 12.42208 | 10.73508 |
| H | 4.35154  | 14.05084 | 5.75471  |
| H | 3.45411  | 15.40013 | 3.88859  |
| H | 1.32824  | 14.72189 | 2.81354  |
| H | 2.72377  | 11.03103 | 7.16483  |
| H | 2.60793  | 13.13664 | 8.51891  |
| H | 4.23191  | 13.57444 | 7.97563  |
| H | 3.99582  | 12.14036 | 8.97729  |
| H | 5.17073  | 10.67818 | 7.30358  |
| H | 5.46288  | 12.07570 | 6.26302  |
| H | 4.66524  | 10.64579 | 5.60198  |
| H | -0.70806 | 11.79412 | 3.83548  |
| H | -1.51103 | 14.13060 | 4.43056  |
| H | -2.24779 | 13.50186 | 2.94778  |
| H | -0.94920 | 14.69204 | 2.85721  |
| H | 0.71307  | 11.49987 | 1.77288  |
| H | 0.35437  | 13.16473 | 1.31145  |
| H | -0.95148 | 11.97637 | 1.39214  |
| H | -4.92070 | 8.40656  | 5.73908  |
| H | -4.95345 | 6.83400  | 7.64561  |
| H | -2.92974 | 6.59279  | 9.05103  |

|   |          |          |          |
|---|----------|----------|----------|
| H | -1.99498 | 10.40863 | 4.68011  |
| H | -3.73978 | 11.60245 | 6.05243  |
| H | -4.99703 | 10.70710 | 5.19774  |
| H | -3.96617 | 11.83098 | 4.30408  |
| H | -3.32887 | 9.90950  | 2.68480  |
| H | -4.39550 | 8.84047  | 3.59896  |
| H | -2.71243 | 8.37946  | 3.33881  |
| H | 0.17875  | 8.55818  | 8.59327  |
| H | -1.40556 | 9.04131  | 10.49222 |
| H | -0.05159 | 8.01200  | 10.96922 |
| H | -1.64640 | 7.30176  | 10.71144 |
| H | 0.30138  | 6.21794  | 7.67130  |
| H | -0.66854 | 5.64506  | 9.02623  |
| H | 0.94395  | 6.31343  | 9.32043  |
| H | 4.14517  | 1.22806  | 2.07111  |
| H | 5.53018  | 0.60137  | 1.21473  |
| H | 4.46538  | -1.10348 | 0.01580  |
| H | 2.90671  | -1.83481 | -1.75787 |
| H | 1.37176  | -0.19256 | -2.82456 |
| H | 1.40771  | 2.17910  | -2.08321 |
| H | 2.95275  | 2.89685  | -0.29009 |
| H | 6.90436  | 3.72828  | 0.27498  |
| H | 5.72428  | 3.19511  | -0.90315 |
| H | 5.92109  | 1.08783  | -2.01134 |
| H | 7.40654  | -0.76644 | -2.68258 |
| H | 9.50093  | -1.20866 | -1.41636 |
| H | 10.10328 | 0.24813  | 0.50650  |
| H | 8.62234  | 2.10850  | 1.16148  |
| H | 5.75399  | 0.51669  | 5.84985  |
| H | 3.57360  | -0.59476 | 6.18753  |
| H | 1.56939  | 0.30753  | 5.05400  |
| H | 6.36029  | 3.47561  | 3.72664  |
| H | 7.10354  | 1.27755  | 2.77497  |
| H | 7.53457  | 0.72780  | 4.39762  |

|   |          |          |          |
|---|----------|----------|----------|
| H | 8.40517  | 2.08137  | 3.67146  |
| H | 7.87293  | 3.60088  | 5.63884  |
| H | 7.12588  | 2.19674  | 6.40392  |
| H | 6.21788  | 3.70224  | 6.26568  |
| H | 1.52136  | 3.29354  | 2.87442  |
| H | 1.48630  | 1.17235  | 1.55592  |
| H | -0.15273 | 1.74006  | 1.90937  |
| H | 0.53591  | 0.39526  | 2.82930  |
| H | 0.63946  | 3.28078  | 5.25492  |
| H | -0.08674 | 1.69976  | 4.94302  |
| H | -0.62744 | 3.10682  | 4.02689  |
| H | 5.76460  | 6.82002  | -2.73961 |
| H | 7.97477  | 7.65333  | -2.01881 |
| H | 8.70032  | 7.30031  | 0.32187  |
| H | 3.35804  | 5.00706  | -0.59332 |
| H | 4.49958  | 3.64525  | -2.37552 |
| H | 4.52882  | 5.05979  | -3.43299 |
| H | 2.98923  | 4.33071  | -2.97178 |
| H | 3.00438  | 7.50032  | -1.01187 |
| H | 2.03586  | 6.45103  | -2.06146 |
| H | 3.48789  | 7.23837  | -2.68744 |
| H | 6.70529  | 5.50530  | 2.88946  |
| H | 8.66634  | 4.28772  | 1.92862  |
| H | 9.08595  | 5.13597  | 3.42546  |
| H | 9.57696  | 5.79914  | 1.86260  |
| H | 6.69658  | 8.00928  | 3.00678  |
| H | 8.39299  | 8.03612  | 2.51131  |
| H | 7.93916  | 7.30046  | 4.05348  |
| C | 3.54182  | 11.08803 | 2.20592  |
| C | 3.72277  | 11.92438 | 1.10518  |
| C | 4.22552  | 11.42292 | -0.09375 |
| C | 4.55569  | 10.07162 | -0.18070 |
| C | 4.37951  | 9.22843  | 0.91533  |
| H | 3.16504  | 11.49999 | 3.13650  |

|   |         |          |          |
|---|---------|----------|----------|
| H | 3.46872 | 12.97633 | 1.19851  |
| H | 4.36799 | 12.07924 | -0.94767 |
| H | 4.96372 | 9.66106  | -1.09978 |
| H | 4.67546 | 8.18655  | 0.83649  |

24

PhSSPh

|   |          |         |          |
|---|----------|---------|----------|
| S | 2.46859  | 1.17389 | -1.71047 |
| S | 3.72027  | 2.71701 | -1.02356 |
| C | 2.05071  | 1.78803 | -3.32652 |
| C | 5.10319  | 2.53047 | -2.12630 |
| C | 6.11583  | 1.60330 | -1.85868 |
| C | 7.17161  | 1.45741 | -2.75264 |
| C | 7.22115  | 2.23445 | -3.91155 |
| C | 6.21281  | 3.15793 | -4.17787 |
| C | 5.15021  | 3.30661 | -3.28872 |
| H | 6.06199  | 1.00114 | -0.95733 |
| H | 7.95888  | 0.73842 | -2.54547 |
| H | 8.04778  | 2.11779 | -4.60645 |
| H | 6.24716  | 3.75917 | -5.08160 |
| H | 4.34970  | 4.01064 | -3.48998 |
| C | 1.01055  | 2.70722 | -3.49939 |
| C | 0.72415  | 3.19412 | -4.77062 |
| C | 1.47062  | 2.76551 | -5.86992 |
| C | 2.50607  | 1.84972 | -5.69780 |
| C | 2.80128  | 1.36110 | -4.42658 |
| H | 0.44201  | 3.03686 | -2.63567 |
| H | -0.08367 | 3.90735 | -4.90614 |
| H | 1.24303  | 3.14766 | -6.86086 |
| H | 3.09116  | 1.51959 | -6.55109 |
| H | 3.61476  | 0.65963 | -4.27441 |

16

PhSMe

|   |         |         |          |
|---|---------|---------|----------|
| C | 2.07141 | 4.95586 | -0.83474 |
| H | 1.89336 | 4.08821 | -1.47506 |

|   |         |         |          |
|---|---------|---------|----------|
| H | 1.17768 | 5.58318 | -0.83702 |
| H | 2.91208 | 5.54056 | -1.21674 |
| S | 2.32770 | 4.46984 | 0.88635  |
| C | 3.78250 | 3.46414 | 0.80655  |
| C | 4.24104 | 2.92839 | 2.01933  |
| C | 5.37563 | 2.12767 | 2.04735  |
| C | 6.07323 | 1.84636 | 0.87184  |
| C | 5.61934 | 2.37755 | -0.33118 |
| C | 4.48122 | 3.18250 | -0.37124 |
| H | 3.70355 | 3.14293 | 2.93896  |
| H | 5.71722 | 1.72067 | 2.99483  |
| H | 6.95979 | 1.22035 | 0.89617  |
| H | 6.15168 | 2.16772 | -1.25476 |
| H | 4.14960 | 3.58316 | -1.32227 |

238

int6

|   |         |          |          |
|---|---------|----------|----------|
| C | 4.64432 | -1.91673 | -3.53992 |
| C | 3.25779 | -2.20050 | -3.65196 |
| C | 2.62973 | -2.07047 | -4.91174 |
| C | 3.37446 | -1.57713 | -5.99066 |
| C | 4.70455 | -1.20562 | -5.85701 |
| C | 5.33416 | -1.39614 | -4.63192 |
| N | 2.55797 | -2.45000 | -2.44379 |
| C | 2.02870 | -3.57576 | -1.96169 |
| N | 2.14374 | -4.82557 | -2.51812 |
| C | 3.23249 | -5.16132 | -3.41635 |
| C | 3.80066 | -6.54294 | -3.17910 |
| C | 4.50876 | -7.16090 | -4.21313 |
| C | 5.10053 | -8.40702 | -4.02401 |
| C | 4.97751 | -9.05947 | -2.79813 |
| C | 4.26191 | -8.45523 | -1.76660 |
| C | 3.67853 | -7.20439 | -1.95334 |
| C | 1.19656 | -2.47453 | -5.17463 |
| C | 0.34106 | -1.32587 | -5.71603 |



|    |          |          |          |
|----|----------|----------|----------|
| C  | 5.40718  | -2.22317 | -2.26757 |
| C  | 5.80232  | -0.96474 | -1.49683 |
| Y  | 1.25867  | -1.08976 | -0.89979 |
| C  | 2.74927  | -0.42100 | 1.02973  |
| Al | 0.95496  | -0.81766 | 2.05704  |
| C  | 1.07936  | -2.34098 | 3.29502  |
| Y  | -0.91881 | 1.46358  | 1.34448  |
| C  | 0.77311  | 0.89398  | 3.20832  |
| Al | -1.67878 | -0.51832 | -0.84849 |
| C  | -3.29593 | -1.62380 | -1.04605 |
| N  | -1.92726 | 3.54722  | 2.02143  |
| C  | -1.54142 | 4.89118  | 1.86998  |
| C  | -0.61212 | 5.49315  | 2.74637  |
| C  | -0.22861 | 6.81820  | 2.52724  |
| C  | -0.72632 | 7.55119  | 1.45700  |
| C  | -1.59634 | 6.93634  | 0.56403  |
| C  | -1.99885 | 5.61222  | 0.74050  |
| C  | 0.03059  | 4.71736  | 3.87641  |
| C  | 1.50369  | 4.44549  | 3.54500  |
| C  | -2.90344 | 4.96566  | -0.28751 |
| C  | -2.24360 | 4.95387  | -1.66995 |
| N  | -2.93242 | 1.63776  | 2.55716  |
| C  | -4.00328 | 0.73239  | 2.60422  |
| C  | -5.18070 | 0.90681  | 1.83324  |
| C  | -6.18145 | -0.06704 | 1.88536  |
| C  | -6.03801 | -1.21762 | 2.64432  |
| C  | -4.86190 | -1.41018 | 3.36224  |
| C  | -3.83718 | -0.46387 | 3.36019  |
| C  | -5.39963 | 2.08833  | 0.90858  |
| C  | -5.62265 | 1.62588  | -0.53754 |
| C  | -2.56547 | -0.71589 | 4.15619  |
| C  | -2.48359 | -2.11580 | 4.76208  |
| C  | 0.86396  | 2.57024  | 0.15773  |
| C  | -0.45923 | -0.86067 | 0.67185  |

|   |          |          |          |
|---|----------|----------|----------|
| C | -2.18433 | 1.46668  | -0.92097 |
| N | 1.30019  | -3.38113 | -0.82612 |
| C | 1.30589  | -4.37797 | 0.18555  |
| C | 2.53866  | -4.79626 | 0.75230  |
| C | 2.55020  | -5.86781 | 1.64756  |
| C | 1.37526  | -6.49253 | 2.04580  |
| C | 0.16415  | -5.99691 | 1.58441  |
| C | 0.10132  | -4.94090 | 0.67032  |
| C | 3.83337  | -4.02567 | 0.55695  |
| C | 4.26132  | -3.38879 | 1.88634  |
| C | -1.26587 | -4.41540 | 0.28593  |
| C | -1.99789 | -3.91052 | 1.53625  |
| C | -0.54939 | -0.57908 | -2.59021 |
| C | -2.95060 | 2.98832  | 2.68160  |
| N | -3.88283 | 3.65941  | 3.44344  |
| C | -4.64351 | 2.96753  | 4.47764  |
| C | -4.17589 | 3.23851  | 5.88559  |
| C | -2.84069 | 3.51381  | 6.17820  |
| C | -2.43652 | 3.75916  | 7.48886  |
| C | -3.36615 | 3.72326  | 8.52598  |
| C | -4.70203 | 3.43938  | 8.24259  |
| C | -5.10199 | 3.20486  | 6.93075  |
| C | -3.83638 | 5.12822  | 3.56504  |
| C | -5.09666 | 5.72706  | 4.13392  |
| C | -5.13702 | 6.16072  | 5.46181  |
| C | -6.29844 | 6.71654  | 5.99257  |
| C | -7.43605 | 6.84842  | 5.19919  |
| C | -7.40069 | 6.43667  | 3.86745  |
| C | -6.23584 | 5.88690  | 3.33967  |
| C | 0.99231  | -5.73498 | -2.49832 |
| C | -0.13331 | -5.37208 | -3.43662 |
| C | -0.47806 | -6.22657 | -4.48517 |
| C | -1.56377 | -5.93919 | -5.31251 |
| C | -2.31197 | -4.78242 | -5.10504 |

|   |          |          |          |
|---|----------|----------|----------|
| C | -1.97543 | -3.91963 | -4.06061 |
| C | -0.90087 | -4.21908 | -3.23080 |
| C | -0.08479 | 5.42425  | 5.22957  |
| C | -4.28651 | 5.61816  | -0.34380 |
| C | -6.57502 | 2.95497  | 1.36552  |
| C | -2.36231 | 0.31573  | 5.26840  |
| C | 4.98658  | -4.85753 | -0.00434 |
| C | -2.13142 | -5.46020 | -0.42506 |
| C | 1.11892  | -3.65086 | -6.15383 |
| C | 6.63943  | -3.08736 | -2.55875 |
| H | 1.12982  | 1.92286  | -0.69946 |
| H | 0.58236  | 3.54105  | -0.27670 |
| H | 1.80542  | 2.73342  | 0.69844  |
| H | -1.09112 | -1.63176 | 1.13999  |
| H | -2.91484 | 1.88263  | -0.21433 |
| H | -1.39316 | 2.21461  | -1.07462 |
| H | -2.72706 | 1.44998  | -1.87301 |
| H | -1.43851 | -0.47596 | -3.22314 |
| H | 0.06007  | 0.29238  | -2.87050 |
| H | -0.06395 | -1.47347 | -3.00840 |
| H | -3.92380 | -1.55705 | -0.14847 |
| H | -3.08721 | -2.68517 | -1.21984 |
| H | -3.91323 | -1.27818 | -1.88683 |
| H | 3.31894  | -0.23308 | 1.94774  |
| H | 2.83352  | 0.53488  | 0.48428  |
| H | 3.37677  | -1.16484 | 0.51064  |
| H | -0.13488 | 1.03393  | 3.81830  |
| H | 1.53414  | 0.62383  | 3.95081  |
| H | 1.10313  | 1.87513  | 2.83893  |
| H | 1.18253  | -3.30675 | 2.79015  |
| H | 0.16745  | -2.39554 | 3.90091  |
| H | 1.91470  | -2.24513 | 4.00121  |
| H | -3.66037 | 5.54495  | 2.57585  |
| H | -2.98864 | 5.43145  | 4.18825  |

|   |          |          |          |
|---|----------|----------|----------|
| H | -4.25660 | 6.04482  | 6.08664  |
| H | -6.31400 | 7.04128  | 7.02881  |
| H | -8.34377 | 7.27826  | 5.61306  |
| H | -8.27801 | 6.55025  | 3.23708  |
| H | -6.20861 | 5.57776  | 2.30049  |
| H | -4.60573 | 1.89669  | 4.28352  |
| H | -5.69583 | 3.25781  | 4.39612  |
| H | -2.11529 | 3.54414  | 5.37249  |
| H | -1.39451 | 3.98233  | 7.69701  |
| H | -3.05309 | 3.91784  | 9.54760  |
| H | -5.43551 | 3.41445  | 9.04353  |
| H | -6.14888 | 3.01529  | 6.70725  |
| H | 0.47984  | 7.28252  | 3.20810  |
| H | -0.42462 | 8.58411  | 1.30989  |
| H | -1.96876 | 7.49253  | -0.29268 |
| H | -0.48178 | 3.75068  | 3.94443  |
| H | -1.12258 | 5.65255  | 5.48682  |
| H | 0.47234  | 6.36674  | 5.23269  |
| H | 0.33311  | 4.79615  | 6.02382  |
| H | 1.96066  | 3.79055  | 4.29473  |
| H | 2.06913  | 5.38370  | 3.52107  |
| H | 1.60289  | 3.97789  | 2.56219  |
| H | -3.03727 | 3.92675  | 0.01771  |
| H | -4.78326 | 5.57261  | 0.62887  |
| H | -4.92617 | 5.10690  | -1.07143 |
| H | -4.22153 | 6.67247  | -0.63405 |
| H | -1.24722 | 4.50627  | -1.61559 |
| H | -2.13325 | 5.96830  | -2.06919 |
| H | -2.84513 | 4.37306  | -2.37753 |
| H | -7.08467 | 0.07770  | 1.29855  |
| H | -6.82444 | -1.96619 | 2.66804  |
| H | -4.74356 | -2.32047 | 3.93808  |
| H | -4.50202 | 2.71193  | 0.92620  |
| H | -6.42567 | 3.32573  | 2.38004  |

|   |          |           |          |
|---|----------|-----------|----------|
| H | -7.50919 | 2.38329   | 1.35070  |
| H | -6.70238 | 3.81508   | 0.69915  |
| H | -5.60131 | 2.48237   | -1.22052 |
| H | -6.59713 | 1.13862   | -0.64744 |
| H | -4.86008 | 0.91091   | -0.85055 |
| H | -1.72486 | -0.62191  | 3.45200  |
| H | -2.29221 | 1.32277   | 4.86264  |
| H | -1.44303 | 0.10510   | 5.82566  |
| H | -3.19780 | 0.29496   | 5.97612  |
| H | -2.58570 | -2.90314  | 4.01218  |
| H | -3.25765 | -2.26222  | 5.52408  |
| H | -1.51641 | -2.24618  | 5.25542  |
| H | 0.61781  | -5.80456  | -1.47527 |
| H | 1.36741  | -6.72626  | -2.75579 |
| H | 0.10568  | -7.12915  | -4.65032 |
| H | -1.82108 | -6.61716  | -6.12121 |
| H | -3.15843 | -4.55747  | -5.74741 |
| H | -2.56084 | -3.02448  | -3.87369 |
| H | -0.66569 | -3.57258  | -2.39317 |
| H | 4.02452  | -4.42594  | -3.26590 |
| H | 2.93444  | -5.07249  | -4.46790 |
| H | 4.59703  | -6.65858  | -5.17406 |
| H | 5.65064  | -8.87241  | -4.83692 |
| H | 5.43163  | -10.03500 | -2.65082 |
| H | 4.15436  | -8.95649  | -0.80895 |
| H | 3.12697  | -6.73704  | -1.14308 |
| H | 3.49882  | -6.19273  | 2.06669  |
| H | 1.40173  | -7.32675  | 2.74073  |
| H | -0.76394 | -6.43667  | 1.93809  |
| H | 3.63304  | -3.21172  | -0.14373 |
| H | 4.81714  | -5.16019  | -1.03774 |
| H | 5.14392  | -5.76808  | 0.58260  |
| H | 5.91552  | -4.28103  | 0.02979  |
| H | 5.11872  | -2.72461  | 1.72947  |

|   |          |          |          |
|---|----------|----------|----------|
| H | 4.55846  | -4.15636 | 2.60854  |
| H | 3.44936  | -2.81213 | 2.32998  |
| H | -1.11258 | -3.56048 | -0.37742 |
| H | -1.65751 | -5.85371 | -1.32561 |
| H | -3.08968 | -5.02010 | -0.71977 |
| H | -2.34473 | -6.30362 | 0.24086  |
| H | -1.34688 | -3.27789 | 2.14191  |
| H | -2.31701 | -4.74865 | 2.16607  |
| H | -2.88857 | -3.33731 | 1.26297  |
| H | 2.88440  | -1.47430 | -6.95525 |
| H | 5.25244  | -0.80093 | -6.70348 |
| H | 6.38367  | -1.14159 | -4.52023 |
| H | 0.76398  | -2.81074 | -4.23108 |
| H | 1.66067  | -4.52583 | -5.79094 |
| H | 1.53958  | -3.37559 | -7.12714 |
| H | 0.07755  | -3.94680 | -6.30035 |
| H | 0.39522  | -0.43810 | -5.08678 |
| H | -0.70549 | -1.64207 | -5.77683 |
| H | 0.66053  | -1.03934 | -6.72406 |
| H | 4.73804  | -2.80226 | -1.63063 |
| H | 6.36947  | -4.01295 | -3.07729 |
| H | 7.14399  | -3.35870 | -1.62672 |
| H | 7.36626  | -2.55546 | -3.18091 |
| H | 4.92805  | -0.36825 | -1.22611 |
| H | 6.46508  | -0.32857 | -2.09014 |
| H | 6.32353  | -1.22915 | -0.57015 |
| S | 2.83759  | 0.90966  | -2.64227 |
| S | 3.82798  | 2.37859  | -1.56040 |
| C | 1.89224  | 1.82017  | -3.85279 |
| C | 5.45843  | 2.28526  | -2.27986 |
| C | 6.53986  | 2.45988  | -1.41223 |
| C | 7.83987  | 2.39552  | -1.90741 |
| C | 8.06439  | 2.13510  | -3.25810 |
| C | 6.98010  | 1.96241  | -4.11826 |

|   |          |         |          |
|---|----------|---------|----------|
| C | 5.67706  | 2.05078 | -3.63843 |
| H | 6.36275  | 2.61680 | -0.35223 |
| H | 8.67816  | 2.52424 | -1.22919 |
| H | 9.07888  | 2.06529 | -3.63859 |
| H | 7.14638  | 1.76170 | -5.17262 |
| H | 4.83815  | 1.91001 | -4.30979 |
| C | 0.89478  | 2.72290 | -3.47444 |
| C | 0.15558  | 3.36903 | -4.45965 |
| C | 0.40721  | 3.11394 | -5.80904 |
| C | 1.40846  | 2.21801 | -6.17594 |
| C | 2.16032  | 1.56847 | -5.19857 |
| H | 0.71267  | 2.91862 | -2.42359 |
| H | -0.62102 | 4.06960 | -4.16891 |
| H | -0.17644 | 3.61835 | -6.57342 |
| H | 1.60778  | 2.01914 | -7.22467 |
| H | 2.92865  | 0.85155 | -5.46921 |

238

TS5

|   |         |          |          |
|---|---------|----------|----------|
| C | 6.87796 | 5.57993  | 0.32970  |
| C | 5.52240 | 5.22547  | 0.11996  |
| C | 4.96398 | 5.33563  | -1.17343 |
| C | 5.78417 | 5.74239  | -2.22883 |
| C | 7.12180 | 6.06310  | -2.03532 |
| C | 7.65539 | 5.99171  | -0.75339 |
| N | 4.75207 | 4.88213  | 1.24935  |
| C | 4.52316 | 3.70568  | 1.84680  |
| N | 4.88850 | 2.46421  | 1.36617  |
| C | 5.65038 | 2.39163  | 0.10850  |
| C | 6.20206 | 1.02630  | -0.20590 |
| C | 5.64399 | 0.26881  | -1.23926 |
| C | 6.15473 | -0.98739 | -1.55931 |
| C | 7.23942 | -1.49998 | -0.85090 |
| C | 7.82084 | -0.74097 | 0.16401  |
| C | 7.30987 | 0.51563  | 0.47651  |

|    |          |          |          |
|----|----------|----------|----------|
| C  | 3.50179  | 5.05953  | -1.45787 |
| C  | 2.81754  | 6.32398  | -1.99201 |
| C  | 7.50830  | 5.49482  | 1.70424  |
| C  | 8.00443  | 6.85668  | 2.18283  |
| Y  | 3.50460  | 6.13870  | 2.85291  |
| C  | 5.23057  | 6.62276  | 4.60209  |
| Al | 3.48333  | 6.96042  | 5.69103  |
| C  | 3.67760  | 5.59733  | 7.10806  |
| Y  | 1.93782  | 9.40835  | 4.48045  |
| C  | 3.53479  | 8.84916  | 6.52352  |
| Al | 0.67033  | 7.03165  | 2.91828  |
| C  | -1.00415 | 5.99918  | 2.89191  |
| N  | 0.81086  | 11.26649 | 5.45509  |
| C  | 1.04513  | 12.65721 | 5.37570  |
| C  | 2.00587  | 13.28545 | 6.19852  |
| C  | 2.26902  | 14.64645 | 6.02059  |
| C  | 1.60659  | 15.39316 | 5.05570  |
| C  | 0.67835  | 14.76603 | 4.23253  |
| C  | 0.39697  | 13.40570 | 4.35943  |
| C  | 2.77821  | 12.52730 | 7.25950  |
| C  | 4.25146  | 12.38575 | 6.86123  |
| C  | -0.61066 | 12.77046 | 3.41944  |
| C  | -0.39322 | 13.16310 | 1.95519  |
| N  | 0.06790  | 9.24451  | 6.00291  |
| C  | -0.94303 | 8.27085  | 6.18058  |
| C  | -2.18780 | 8.37595  | 5.50592  |
| C  | -3.12959 | 7.35118  | 5.62891  |
| C  | -2.87555 | 6.21815  | 6.38136  |
| C  | -1.66290 | 6.11808  | 7.05038  |
| C  | -0.69158 | 7.12002  | 6.98655  |
| C  | -2.59274 | 9.56320  | 4.65283  |
| C  | -2.99355 | 9.14341  | 3.23336  |
| C  | 0.57970  | 6.95420  | 7.80910  |
| C  | 0.66236  | 5.62328  | 8.55631  |



|   |          |          |          |
|---|----------|----------|----------|
| C | 2.56763  | 11.55812 | 2.83784  |
| C | 1.95914  | 6.92656  | 4.41446  |
| C | 0.29903  | 9.00354  | 2.45692  |
| N | 3.81277  | 3.85621  | 2.99578  |
| C | 3.78272  | 2.98357  | 4.10502  |
| C | 4.96835  | 2.52789  | 4.73927  |
| C | 4.87007  | 1.70758  | 5.86483  |
| C | 3.64332  | 1.33821  | 6.39611  |
| C | 2.48724  | 1.81958  | 5.79957  |
| C | 2.52826  | 2.64543  | 4.67432  |
| C | 6.36376  | 2.88614  | 4.26932  |
| C | 7.16963  | 3.60469  | 5.35845  |
| C | 1.20605  | 3.13963  | 4.12234  |
| C | 0.39985  | 3.85023  | 5.21152  |
| C | 1.62078  | 6.42914  | 1.17457  |
| C | -0.05877 | 10.57611 | 6.22021  |
| N | -0.92849 | 11.13912 | 7.13191  |
| C | -1.56242 | 10.35441 | 8.18744  |
| C | -1.07616 | 10.67276 | 9.57881  |
| C | 0.23517  | 11.07447 | 9.83128  |
| C | 0.65174  | 11.36982 | 11.12693 |
| C | -0.24022 | 11.25460 | 12.19138 |
| C | -1.54895 | 10.83809 | 11.94942 |
| C | -1.96235 | 10.55506 | 10.65144 |
| C | -0.99210 | 12.60335 | 7.33302  |
| C | -2.21159 | 13.08730 | 8.07899  |
| C | -2.08795 | 13.55160 | 9.39165  |
| C | -3.19485 | 14.02967 | 10.08723 |
| C | -4.44739 | 14.04986 | 9.47797  |
| C | -4.58018 | 13.60786 | 8.16262  |
| C | -3.46796 | 13.14040 | 7.46778  |
| C | 3.94312  | 1.35773  | 1.56709  |
| C | 2.78217  | 1.39769  | 0.59921  |
| C | 2.51551  | 0.32532  | -0.25371 |

|   |          |          |          |
|---|----------|----------|----------|
| C | 1.44137  | 0.37279  | -1.14261 |
| C | 0.61762  | 1.49531  | -1.18574 |
| C | 0.86698  | 2.56623  | -0.32755 |
| C | 1.93872  | 2.51348  | 0.55612  |
| C | 2.68626  | 13.18911 | 8.63937  |
| C | -2.04910 | 13.08813 | 3.83573  |
| C | -3.75879 | 10.31382 | 5.30321  |
| C | 0.79615  | 8.08154  | 8.81537  |
| C | 7.10988  | 1.63461  | 3.80288  |
| C | 0.39004  | 1.99611  | 3.50988  |
| C | 3.28273  | 3.89962  | -2.43516 |
| C | 8.62858  | 4.45181  | 1.74798  |
| H | 2.91839  | 11.70491 | 1.81968  |
| H | 1.50339  | 11.29925 | 2.81830  |
| H | 2.73570  | 12.44076 | 3.45269  |
| H | 1.17313  | 6.65957  | 5.14312  |
| H | -0.22942 | 9.70859  | 3.11536  |
| H | 1.08292  | 9.54584  | 1.92075  |
| H | -0.44620 | 8.78248  | 1.68452  |
| H | 0.78425  | 6.75691  | 0.54600  |
| H | 2.48739  | 6.88876  | 0.67387  |
| H | 1.67902  | 5.34583  | 0.99621  |
| H | -1.58196 | 6.06698  | 3.81830  |
| H | -0.80008 | 4.93817  | 2.70236  |
| H | -1.65888 | 6.33995  | 2.07772  |
| H | 5.88743  | 6.83936  | 5.45010  |
| H | 5.65585  | 7.22957  | 3.79102  |
| H | 5.43496  | 5.56144  | 4.38663  |
| H | 2.62557  | 9.07526  | 7.09985  |
| H | 4.29296  | 8.64829  | 7.29161  |
| H | 3.89306  | 9.77992  | 6.06340  |
| H | 2.97707  | 4.76480  | 6.98437  |
| H | 3.55637  | 5.98451  | 8.12600  |
| H | 4.68125  | 5.15670  | 7.05059  |

|   |          |          |          |
|---|----------|----------|----------|
| H | -0.96641 | 13.08539 | 6.36065  |
| H | -0.10373 | 12.94379 | 7.87116  |
| H | -1.11892 | 13.51420 | 9.87999  |
| H | -3.07769 | 14.37656 | 11.10958 |
| H | -5.31410 | 14.41576 | 10.02102 |
| H | -5.54903 | 13.63526 | 7.67217  |
| H | -3.57842 | 12.81852 | 6.43917  |
| H | -1.41145 | 9.29768  | 7.97994  |
| H | -2.64395 | 10.52058 | 8.15357  |
| H | 0.93136  | 11.16488 | 9.00524  |
| H | 1.67336  | 11.69348 | 11.30253 |
| H | 0.08147  | 11.48831 | 13.20204 |
| H | -2.25308 | 10.74873 | 12.77169 |
| H | -2.99259 | 10.26548 | 10.46066 |
| H | 3.00724  | 15.12903 | 6.65510  |
| H | 1.81766  | 16.45211 | 4.93923  |
| H | 0.16706  | 15.34278 | 3.46718  |
| H | 2.34825  | 11.52157 | 7.32535  |
| H | 1.65326  | 13.35373 | 8.95616  |
| H | 3.19151  | 14.16021 | 8.64450  |
| H | 3.17667  | 12.56276 | 9.39225  |
| H | 4.79036  | 11.75737 | 7.57845  |
| H | 4.73847  | 13.36679 | 6.83463  |
| H | 4.36001  | 11.94436 | 5.86672  |
| H | -0.48069 | 11.68743 | 3.50130  |
| H | -2.27189 | 12.68180 | 4.82258  |
| H | -2.76146 | 12.65037 | 3.12833  |
| H | -2.21882 | 14.16985 | 3.86665  |
| H | 0.64853  | 13.02267 | 1.65577  |
| H | -0.66008 | 14.20980 | 1.77352  |
| H | -1.02678 | 12.54842 | 1.30680  |
| H | -4.07535 | 7.44232  | 5.10241  |
| H | -3.60963 | 5.42105  | 6.45096  |
| H | -1.47202 | 5.23428  | 7.64505  |

|   |          |          |          |
|---|----------|----------|----------|
| H | -1.74340 | 10.24706 | 4.57765  |
| H | -3.49423 | 10.67947 | 6.29495  |
| H | -4.62611 | 9.65457  | 5.41209  |
| H | -4.06686 | 11.16601 | 4.68916  |
| H | -3.07947 | 10.02297 | 2.58592  |
| H | -3.96534 | 8.63894  | 3.23251  |
| H | -2.26843 | 8.45666  | 2.79956  |
| H | 1.42347  | 6.98954  | 7.11184  |
| H | 0.83549  | 9.04841  | 8.31905  |
| H | 1.74283  | 7.93624  | 9.34593  |
| H | -0.00418 | 8.11039  | 9.56120  |
| H | 0.61316  | 4.76015  | 7.88918  |
| H | -0.14118 | 5.53894  | 9.29690  |
| H | 1.61078  | 5.56641  | 9.09370  |
| H | 3.58411  | 1.38611  | 2.59637  |
| H | 4.49833  | 0.42468  | 1.44950  |
| H | 3.15904  | -0.54962 | -0.22442 |
| H | 1.24964  | -0.46904 | -1.80199 |
| H | -0.21816 | 1.53308  | -1.87835 |
| H | 0.22408  | 3.44184  | -0.33957 |
| H | 2.11250  | 3.32788  | 1.24932  |
| H | 6.47673  | 3.09624  | 0.17832  |
| H | 5.02828  | 2.71551  | -0.72928 |
| H | 4.79824  | 0.66808  | -1.79092 |
| H | 5.70677  | -1.56339 | -2.36403 |
| H | 7.63842  | -2.47989 | -1.09637 |
| H | 8.68014  | -1.12382 | 0.70703  |
| H | 7.77636  | 1.10974  | 1.25359  |
| H | 5.78311  | 1.35907  | 6.33957  |
| H | 3.58944  | 0.69625  | 7.27036  |
| H | 1.52106  | 1.55195  | 6.21679  |
| H | 6.27998  | 3.56251  | 3.41619  |
| H | 6.53853  | 1.10687  | 3.03793  |
| H | 7.27250  | 0.94500  | 4.63791  |

|   |          |          |          |
|---|----------|----------|----------|
| H | 8.09211  | 1.89594  | 3.39441  |
| H | 8.12815  | 3.95148  | 4.95743  |
| H | 7.38493  | 2.93447  | 6.19688  |
| H | 6.63246  | 4.46772  | 5.75593  |
| H | 1.41871  | 3.86950  | 3.33342  |
| H | 0.95111  | 1.46130  | 2.74045  |
| H | -0.52726 | 2.38233  | 3.05266  |
| H | 0.10155  | 1.27341  | 4.28130  |
| H | 0.98424  | 4.66005  | 5.64916  |
| H | 0.11845  | 3.15632  | 6.01061  |
| H | -0.51845 | 4.27823  | 4.80760  |
| H | 5.35667  | 5.81523  | -3.22517 |
| H | 7.74093  | 6.37057  | -2.87344 |
| H | 8.69827  | 6.24966  | -0.58788 |
| H | 3.03177  | 4.78622  | -0.51140 |
| H | 3.60463  | 2.94271  | -2.01707 |
| H | 3.82123  | 4.06213  | -3.37489 |
| H | 2.21832  | 3.80013  | -2.66670 |
| H | 3.02323  | 7.19263  | -1.36363 |
| H | 1.73296  | 6.18126  | -2.04102 |
| H | 3.16996  | 6.56314  | -3.00132 |
| H | 6.72852  | 5.17537  | 2.39868  |
| H | 8.26665  | 3.46374  | 1.44984  |
| H | 9.03823  | 4.36997  | 2.75988  |
| H | 9.44934  | 4.72122  | 1.07459  |
| H | 7.19816  | 7.59473  | 2.19555  |
| H | 8.79906  | 7.24875  | 1.53908  |
| H | 8.39976  | 6.79178  | 3.20025  |
| S | 4.00518  | 8.81315  | 2.27762  |
| S | 4.60116  | 10.77254 | 3.61179  |
| C | 4.09092  | 9.20501  | 0.56288  |
| C | 6.26632  | 10.06885 | 3.69189  |
| C | 6.72789  | 9.51825  | 4.89035  |
| C | 8.08719  | 9.25699  | 5.05856  |

|   |          |          |          |
|---|----------|----------|----------|
| C | 8.98814  | 9.54019  | 4.03426  |
| C | 8.52711  | 10.08528 | 2.83418  |
| C | 7.17278  | 10.34949 | 2.66134  |
| H | 6.02611  | 9.30956  | 5.68944  |
| H | 8.44093  | 8.83302  | 5.99444  |
| H | 10.04677 | 9.33944  | 4.16926  |
| H | 9.22725  | 10.31105 | 2.03475  |
| H | 6.80839  | 10.79257 | 1.73920  |
| C | 3.03497  | 9.82251  | -0.11975 |
| C | 3.15507  | 10.08818 | -1.48069 |
| C | 4.31742  | 9.73860  | -2.16754 |
| C | 5.36174  | 9.10859  | -1.49150 |
| C | 5.25441  | 8.83966  | -0.13151 |
| H | 2.12569  | 10.08222 | 0.40642  |
| H | 2.33195  | 10.56331 | -2.00610 |
| H | 4.40232  | 9.94307  | -3.23052 |
| H | 6.25704  | 8.80229  | -2.02091 |
| H | 6.05451  | 8.32767  | 0.39074  |

238

int7

|   |         |          |          |
|---|---------|----------|----------|
| C | 4.00702 | -1.79871 | -4.02717 |
| C | 2.67876 | -2.29408 | -4.04068 |
| C | 1.94989 | -2.30249 | -5.25326 |
| C | 2.57344 | -1.83558 | -6.41473 |
| C | 3.87469 | -1.34968 | -6.40607 |
| C | 4.58168 | -1.33253 | -5.20914 |
| N | 2.10642 | -2.61994 | -2.79385 |
| C | 1.94227 | -3.78077 | -2.14483 |
| N | 2.28045 | -5.02634 | -2.63042 |
| C | 3.05268 | -5.10607 | -3.88323 |
| C | 3.56077 | -6.48106 | -4.23213 |
| C | 2.84198 | -7.28494 | -5.12321 |
| C | 3.30274 | -8.55044 | -5.47650 |
| C | 4.50369 | -9.02629 | -4.95321 |

|    |          |          |          |
|----|----------|----------|----------|
| C  | 5.24651  | -8.22065 | -4.09245 |
| C  | 4.78054  | -6.95571 | -3.74198 |
| C  | 0.51646  | -2.78456 | -5.35127 |
| C  | -0.40764 | -1.68451 | -5.88688 |
| C  | 4.81077  | -1.76157 | -2.74397 |
| C  | 5.09617  | -0.32563 | -2.30293 |
| Y  | 1.10493  | -1.28350 | -1.10343 |
| C  | 2.91228  | -0.78193 | 0.65629  |
| Al | 1.17739  | -0.75337 | 1.81001  |
| C  | 1.45682  | -2.17816 | 3.13755  |
| Y  | -0.42095 | 1.67560  | 0.81571  |
| C  | 1.33644  | 1.14634  | 2.60499  |
| Al | -1.75390 | -0.52923 | -0.81384 |
| C  | -3.36592 | -1.65810 | -0.74441 |
| N  | -1.37108 | 3.63335  | 1.78789  |
| C  | -0.93551 | 4.97242  | 1.82215  |
| C  | -0.28275 | 5.54746  | 2.93857  |
| C  | 0.20597  | 6.85219  | 2.83857  |
| C  | 0.06568  | 7.59885  | 1.67802  |
| C  | -0.56993 | 7.03147  | 0.57908  |
| C  | -1.06290 | 5.72713  | 0.62363  |
| C  | -0.05443 | 4.78398  | 4.22920  |
| C  | 1.37632  | 4.24284  | 4.29987  |
| C  | -1.74676 | 5.11967  | -0.58773 |
| C  | -1.50175 | 5.86202  | -1.90036 |
| N  | -2.33873 | 1.68161  | 2.21930  |
| C  | -3.32459 | 0.70856  | 2.49715  |
| C  | -4.59175 | 0.69897  | 1.86223  |
| C  | -5.46693 | -0.36254 | 2.11324  |
| C  | -5.12979 | -1.40056 | 2.96526  |
| C  | -3.89510 | -1.37639 | 3.60394  |
| C  | -2.98421 | -0.34020 | 3.39735  |
| C  | -5.07425 | 1.77554  | 0.90666  |
| C  | -5.30791 | 1.21644  | -0.50173 |

|   |          |          |          |
|---|----------|----------|----------|
| C | -1.66213 | -0.33478 | 4.15033  |
| C | -1.42538 | -1.59392 | 4.98188  |
| C | 2.12068  | 4.99227  | -0.80973 |
| C | -0.41604 | -0.73641 | 0.63008  |
| C | -2.07952 | 1.49040  | -1.15018 |
| N | 1.35857  | -3.60526 | -0.93200 |
| C | 1.48546  | -4.47564 | 0.17281  |
| C | 2.75634  | -4.87972 | 0.66054  |
| C | 2.82954  | -5.72572 | 1.76892  |
| C | 1.69045  | -6.16076 | 2.43092  |
| C | 0.45291  | -5.71701 | 1.98863  |
| C | 0.32365  | -4.87461 | 0.88256  |
| C | 4.06586  | -4.41378 | 0.05816  |
| C | 4.94201  | -3.69140 | 1.08915  |
| C | -1.07338 | -4.42878 | 0.50122  |
| C | -1.79245 | -3.78882 | 1.69365  |
| C | -0.89936 | -1.02805 | -2.62770 |
| C | -2.36724 | 3.00827  | 2.45682  |
| N | -3.27630 | 3.63857  | 3.27737  |
| C | -4.14248 | 2.90481  | 4.20130  |
| C | -4.15693 | 3.42574  | 5.61457  |
| C | -2.98795 | 3.77622  | 6.28827  |
| C | -3.03615 | 4.24651  | 7.59860  |
| C | -4.25838 | 4.35183  | 8.25958  |
| C | -5.43048 | 3.98146  | 7.60098  |
| C | -5.37768 | 3.52863  | 6.28658  |
| C | -3.40134 | 5.10213  | 3.32164  |
| C | -4.81848 | 5.59852  | 3.45203  |
| C | -5.24275 | 6.21661  | 4.63044  |
| C | -6.54064 | 6.70746  | 4.74654  |
| C | -7.43112 | 6.58463  | 3.68172  |
| C | -7.01226 | 5.98120  | 2.49657  |
| C | -5.71152 | 5.49877  | 2.38317  |
| C | 1.38079  | -6.14464 | -2.33231 |



|   |          |          |          |
|---|----------|----------|----------|
| C | 0.10533  | -6.13200 | -3.14574 |
| C | -0.25706 | -7.22571 | -3.93444 |
| C | -1.44675 | -7.21699 | -4.66268 |
| C | -2.29390 | -6.11262 | -4.60554 |
| C | -1.95015 | -5.02171 | -3.80716 |
| C | -0.76325 | -5.03599 | -3.08317 |
| C | -0.32853 | 5.62691  | 5.47968  |
| C | -3.25440 | 4.97099  | -0.36783 |
| C | -6.38159 | 2.42710  | 1.37413  |
| C | -1.49242 | 0.88157  | 5.06801  |
| C | 4.83393  | -5.58410 | -0.55563 |
| C | -1.90864 | -5.59559 | -0.03825 |
| C | 0.36612  | -4.03685 | -6.22263 |
| C | 6.10238  | -2.57740 | -2.84546 |
| H | 1.97453  | 4.24499  | -1.59162 |
| H | 1.27462  | 5.67857  | -0.78499 |
| H | 3.03819  | 5.55871  | -0.98466 |
| H | -1.10794 | -1.27582 | 1.29726  |
| H | -2.63311 | 2.13157  | -0.45096 |
| H | -1.25383 | 2.06381  | -1.59522 |
| H | -2.76227 | 1.37540  | -1.99913 |
| H | -1.80245 | -0.75564 | -3.18646 |
| H | -0.11119 | -0.47879 | -3.16643 |
| H | -0.76628 | -2.09683 | -2.84616 |
| H | -3.92430 | -1.57857 | 0.19331  |
| H | -3.05914 | -2.70591 | -0.85820 |
| H | -4.06740 | -1.44889 | -1.56236 |
| H | 3.53924  | -0.76836 | 1.55698  |
| H | 3.23803  | 0.10144  | 0.09450  |
| H | 3.27715  | -1.67954 | 0.12970  |
| H | 0.51514  | 1.59853  | 3.18547  |
| H | 2.08205  | 0.89614  | 3.36760  |
| H | 1.82987  | 1.93723  | 2.02277  |
| H | 0.55189  | -2.63024 | 3.54618  |

|   |          |          |          |
|---|----------|----------|----------|
| H | 2.06254  | -1.83681 | 3.98836  |
| H | 2.01032  | -2.99165 | 2.65207  |
| H | -2.97466 | 5.50839  | 2.40913  |
| H | -2.81204 | 5.50061  | 4.15244  |
| H | -4.55529 | 6.29326  | 5.46801  |
| H | -6.85757 | 7.17797  | 5.67263  |
| H | -8.44559 | 6.96231  | 3.77206  |
| H | -7.69742 | 5.88886  | 1.65874  |
| H | -5.38326 | 5.03726  | 1.45878  |
| H | -3.82651 | 1.86574  | 4.21766  |
| H | -5.16862 | 2.90779  | 3.82574  |
| H | -2.03772 | 3.68787  | 5.77740  |
| H | -2.11691 | 4.53025  | 8.10300  |
| H | -4.29759 | 4.71971  | 9.28073  |
| H | -6.38869 | 4.06201  | 8.10610  |
| H | -6.29523 | 3.27817  | 5.76092  |
| H | 0.71768  | 7.29033  | 3.68978  |
| H | 0.45205  | 8.61231  | 1.62594  |
| H | -0.67749 | 7.61346  | -0.33027 |
| H | -0.73282 | 3.92447  | 4.23005  |
| H | -1.32502 | 6.07607  | 5.47625  |
| H | 0.40242  | 6.43511  | 5.57944  |
| H | -0.23909 | 5.00695  | 6.37729  |
| H | 1.53129  | 3.67954  | 5.22686  |
| H | 2.09915  | 5.06490  | 4.26723  |
| H | 1.58307  | 3.57913  | 3.46309  |
| H | -1.34354 | 4.10560  | -0.70367 |
| H | -3.46164 | 4.36965  | 0.51741  |
| H | -3.72597 | 4.47875  | -1.22464 |
| H | -3.71906 | 5.95388  | -0.23338 |
| H | -0.43822 | 5.99808  | -2.11693 |
| H | -1.97550 | 6.84954  | -1.89822 |
| H | -1.94242 | 5.29495  | -2.72625 |
| H | -6.43092 | -0.37616 | 1.61266  |

|   |          |           |          |
|---|----------|-----------|----------|
| H | -5.81985 | -2.22141  | 3.13626  |
| H | -3.64079 | -2.18351  | 4.27977  |
| H | -4.30319 | 2.54821   | 0.84910  |
| H | -6.29748 | 2.90768   | 2.34859  |
| H | -7.18307 | 1.68423   | 1.43590  |
| H | -6.70086 | 3.18960   | 0.65573  |
| H | -5.50471 | 2.03018   | -1.20862 |
| H | -6.17679 | 0.54982   | -0.51052 |
| H | -4.45549 | 0.64186   | -0.85339 |
| H | -0.87099 | -0.28393  | 3.39179  |
| H | -1.52241 | 1.81774   | 4.51142  |
| H | -0.52646 | 0.82964   | 5.58156  |
| H | -2.27631 | 0.91096   | 5.83226  |
| H | -1.49895 | -2.50716  | 4.38681  |
| H | -2.14427 | -1.66227  | 5.80664  |
| H | -0.42353 | -1.56250  | 5.41697  |
| H | 1.14449  | -6.12219  | -1.26692 |
| H | 1.93230  | -7.06934  | -2.51240 |
| H | 0.39960  | -8.09044  | -3.97756 |
| H | -1.71127 | -8.07539  | -5.27374 |
| H | -3.22083 | -6.10536  | -5.17169 |
| H | -2.60958 | -4.16132  | -3.73698 |
| H | -0.51911 | -4.20831  | -2.42703 |
| H | 3.90082  | -4.42878  | -3.78241 |
| H | 2.45970  | -4.74197  | -4.72369 |
| H | 1.91089  | -6.91354  | -5.53946 |
| H | 2.72781  | -9.16085  | -6.16708 |
| H | 4.86657  | -10.01262 | -5.22735 |
| H | 6.19602  | -8.57265  | -3.69962 |
| H | 5.37406  | -6.32578  | -3.08933 |
| H | 3.80729  | -6.03582  | 2.12750  |
| H | 1.76778  | -6.81969  | 3.29070  |
| H | -0.44473 | -6.02784  | 2.51498  |
| H | 3.84041  | -3.70515  | -0.74251 |

|   |          |          |          |
|---|----------|----------|----------|
| H | 4.20603  | -6.12510 | -1.26374 |
| H | 5.15387  | -6.28882 | 0.21948  |
| H | 5.73257  | -5.23047 | -1.07372 |
| H | 5.80428  | -3.22621 | 0.59856  |
| H | 5.32594  | -4.39195 | 1.83795  |
| H | 4.38550  | -2.91570 | 1.61738  |
| H | -0.97770 | -3.66896 | -0.28082 |
| H | -1.41847 | -6.10226 | -0.87116 |
| H | -2.88457 | -5.24057 | -0.38675 |
| H | -2.08327 | -6.33623 | 0.75039  |
| H | -1.16380 | -3.03334 | 2.16538  |
| H | -2.04283 | -4.53839 | 2.45260  |
| H | -2.72404 | -3.31283 | 1.37921  |
| H | 2.01603  | -1.85092 | -7.34760 |
| H | 4.33315  | -0.98817 | -7.32193 |
| H | 5.59972  | -0.95247 | -5.18969 |
| H | 0.19242  | -3.04502 | -4.34280 |
| H | 0.86476  | -4.90408 | -5.78586 |
| H | 0.77614  | -3.87455 | -7.22515 |
| H | -0.69075 | -4.29852 | -6.32232 |
| H | -0.27245 | -0.74271 | -5.35338 |
| H | -1.45410 | -1.99150 | -5.78741 |
| H | -0.21822 | -1.49666 | -6.94985 |
| H | 4.19607  | -2.22209 | -1.96752 |
| H | 5.89951  | -3.61349 | -3.13397 |
| H | 6.62161  | -2.59016 | -1.88139 |
| H | 6.78778  | -2.15552 | -3.58838 |
| H | 4.17467  | 0.25520  | -2.19324 |
| H | 5.73078  | 0.19243  | -3.03131 |
| H | 5.60585  | -0.31696 | -1.33530 |
| S | 1.50798  | 1.47317  | -1.33747 |
| S | 2.16099  | 4.23805  | 0.82710  |
| C | 1.08878  | 1.91473  | -3.00153 |
| C | 3.69608  | 3.34900  | 0.79286  |

|   |          |         |          |
|---|----------|---------|----------|
| C | 4.21869  | 2.92689 | 2.02316  |
| C | 5.39908  | 2.19256 | 2.06890  |
| C | 6.09284  | 1.90137 | 0.89525  |
| C | 5.58713  | 2.34484 | -0.32405 |
| C | 4.38624  | 3.04730 | -0.38489 |
| H | 3.70566  | 3.18351 | 2.94385  |
| H | 5.78732  | 1.86620 | 3.02947  |
| H | 7.02379  | 1.34381 | 0.93216  |
| H | 6.12123  | 2.13328 | -1.24464 |
| H | 3.99163  | 3.34432 | -1.34819 |
| C | 0.27352  | 3.01657 | -3.29115 |
| C | -0.02060 | 3.35267 | -4.61052 |
| C | 0.50162  | 2.60355 | -5.66345 |
| C | 1.33374  | 1.51999 | -5.38423 |
| C | 1.62945  | 1.17830 | -4.06726 |
| H | -0.12643 | 3.61565 | -2.48139 |
| H | -0.65826 | 4.20914 | -4.81170 |
| H | 0.27057  | 2.86707 | -6.69109 |
| H | 1.75912  | 0.92427 | -6.18545 |
| H | 2.28908  | 0.33811 | -3.87228 |

222

Complex 3

|   |         |          |          |
|---|---------|----------|----------|
| C | 3.02587 | -0.64750 | -3.12729 |
| C | 2.05143 | -1.65133 | -3.36527 |
| C | 1.41141 | -1.72356 | -4.62539 |
| C | 1.80741 | -0.83387 | -5.62831 |
| C | 2.77745 | 0.13284  | -5.40915 |
| C | 3.37129 | 0.22659  | -4.15606 |
| N | 1.68580 | -2.45774 | -2.26495 |
| C | 2.00358 | -3.71883 | -1.95713 |
| N | 2.79911 | -4.56937 | -2.69422 |
| C | 3.44908 | -4.09225 | -3.92608 |
| C | 4.61913 | -4.93206 | -4.36602 |
| C | 4.46814 | -5.86388 | -5.39722 |

|    |          |          |          |
|----|----------|----------|----------|
| C  | 5.54557  | -6.63758 | -5.82257 |
| C  | 6.79513  | -6.47887 | -5.22630 |
| C  | 6.96333  | -5.53188 | -4.21705 |
| C  | 5.88338  | -4.76063 | -3.79629 |
| C  | 0.27587  | -2.68390 | -4.93726 |
| C  | -1.02245 | -1.91863 | -5.23131 |
| C  | 3.73316  | -0.55860 | -1.78853 |
| C  | 4.11378  | 0.86467  | -1.38405 |
| Y  | 0.33129  | -2.15823 | -0.27625 |
| C  | 1.76774  | -1.94399 | 1.82852  |
| Al | -0.10013 | -1.56149 | 2.66778  |
| C  | -0.19756 | -2.74581 | 4.24042  |
| Y  | -1.61327 | 0.67696  | 1.29166  |
| C  | 0.05057  | 0.41450  | 3.27202  |
| Al | -2.67483 | -1.64540 | -0.29809 |
| C  | -4.44046 | -2.48768 | -0.08267 |
| N  | -1.70058 | 3.06154  | 1.38536  |
| C  | -0.98152 | 4.10665  | 0.77342  |
| C  | 0.28320  | 4.51032  | 1.26025  |
| C  | 0.98765  | 5.50626  | 0.57930  |
| C  | 0.47987  | 6.10179  | -0.56900 |
| C  | -0.74326 | 5.66998  | -1.06641 |
| C  | -1.47554 | 4.66803  | -0.42893 |
| C  | 0.91092  | 3.88993  | 2.49067  |
| C  | 2.20796  | 3.15289  | 2.13525  |
| C  | -2.78167 | 4.21010  | -1.04440 |
| C  | -2.59083 | 3.69350  | -2.47140 |
| N  | -3.33650 | 1.82988  | 2.27880  |
| C  | -4.63872 | 1.44586  | 2.63857  |
| C  | -5.79503 | 2.03345  | 2.06301  |
| C  | -7.05579 | 1.60761  | 2.48727  |
| C  | -7.20933 | 0.60072  | 3.42956  |
| C  | -6.07520 | -0.03052 | 3.92486  |
| C  | -4.79316 | 0.35318  | 3.53098  |

|   |          |          |          |
|---|----------|----------|----------|
| C | -5.73639 | 3.07508  | 0.96355  |
| C | -6.32948 | 2.51534  | -0.33538 |
| C | -3.61078 | -0.42049 | 4.07800  |
| C | -3.82838 | -1.93289 | 3.99760  |
| C | -1.47030 | -1.72435 | 1.26235  |
| C | -2.99022 | 0.34253  | -0.83129 |
| N | 1.40819  | -4.11330 | -0.79642 |
| C | 1.76609  | -5.14699 | 0.09239  |
| C | 3.05752  | -5.25324 | 0.67248  |
| C | 3.29100  | -6.25019 | 1.62281  |
| C | 2.28864  | -7.11583 | 2.04044  |
| C | 1.01734  | -6.98548 | 1.49684  |
| C | 0.73613  | -6.01928 | 0.53049  |
| C | 4.20668  | -4.33576 | 0.30537  |
| C | 4.85632  | -3.67690 | 1.52826  |
| C | -0.67408 | -5.92855 | -0.01605 |
| C | -1.66051 | -5.47881 | 1.06618  |
| C | -1.73211 | -2.52232 | -1.90757 |
| C | -2.81042 | 3.07286  | 2.14291  |
| N | -3.32030 | 4.16786  | 2.80528  |
| C | -4.00290 | 3.94649  | 4.07644  |
| C | -3.07770 | 3.70892  | 5.24484  |
| C | -1.73916 | 3.35901  | 5.06805  |
| C | -0.92331 | 3.08005  | 6.16277  |
| C | -1.44015 | 3.14757  | 7.45374  |
| C | -2.77622 | 3.50507  | 7.64066  |
| C | -3.58574 | 3.78838  | 6.54479  |
| C | -2.62143 | 5.46243  | 2.69345  |
| C | -3.35801 | 6.58048  | 3.37704  |
| C | -2.97362 | 7.00047  | 4.65334  |
| C | -3.66813 | 8.01832  | 5.30256  |
| C | -4.75507 | 8.62869  | 4.67938  |
| C | -5.13928 | 8.22264  | 3.40178  |
| C | -4.44165 | 7.20653  | 2.75443  |

|   |          |          |          |
|---|----------|----------|----------|
| C | 2.49626  | -6.00325 | -2.68117 |
| C | 1.36081  | -6.39090 | -3.59997 |
| C | 1.52453  | -7.39550 | -4.55608 |
| C | 0.46652  | -7.77015 | -5.38401 |
| C | -0.77204 | -7.14411 | -5.26218 |
| C | -0.94758 | -6.14597 | -4.30419 |
| C | 0.11082  | -5.77612 | -3.48163 |
| C | 1.16755  | 4.91471  | 3.60035  |
| C | -3.83324 | 5.32195  | -1.00019 |
| C | -6.43360 | 4.37617  | 1.36899  |
| C | -3.24401 | 0.01976  | 5.49674  |
| C | 5.27496  | -5.09733 | -0.48371 |
| C | -1.12368 | -7.24143 | -0.66307 |
| C | 0.55929  | -3.61711 | -6.12140 |
| C | 4.96676  | -1.46795 | -1.76471 |
| H | -2.09870 | -2.44674 | 1.81117  |
| H | -3.69647 | 0.94848  | -0.24184 |
| H | -2.20098 | 1.00956  | -1.21316 |
| H | -3.55957 | 0.08979  | -1.73431 |
| H | -2.51629 | -2.29778 | -2.64084 |
| H | -0.81320 | -2.30080 | -2.46849 |
| H | -1.76511 | -3.61500 | -1.78223 |
| H | -5.04461 | -1.92458 | 0.64095  |
| H | -4.37180 | -3.51705 | 0.29024  |
| H | -5.01480 | -2.52128 | -1.01770 |
| H | 2.28738  | -1.63653 | 2.74470  |
| H | 2.32690  | -1.39766 | 1.04916  |
| H | 1.99733  | -3.01487 | 1.72968  |
| H | -0.78147 | 0.94855  | 3.76077  |
| H | 0.71841  | 0.18594  | 4.11262  |
| H | 0.62265  | 1.13139  | 2.66941  |
| H | -0.61111 | -3.72965 | 3.98671  |
| H | -0.80981 | -2.33560 | 5.05225  |
| H | 0.80194  | -2.92404 | 4.65899  |



|   |          |          |          |
|---|----------|----------|----------|
| H | -2.50295 | 5.69860  | 1.63750  |
| H | -1.61546 | 5.38488  | 3.11617  |
| H | -2.13739 | 6.51035  | 5.14403  |
| H | -3.36133 | 8.33279  | 6.29584  |
| H | -5.29835 | 9.42189  | 5.18477  |
| H | -5.97999 | 8.70088  | 2.90757  |
| H | -4.73972 | 6.89172  | 1.75902  |
| H | -4.68203 | 3.10069  | 3.97949  |
| H | -4.63087 | 4.81749  | 4.27600  |
| H | -1.32987 | 3.29409  | 4.06765  |
| H | 0.11366  | 2.80242  | 5.99883  |
| H | -0.80922 | 2.92520  | 8.30912  |
| H | -3.18752 | 3.56443  | 8.64433  |
| H | -4.62561 | 4.06855  | 6.69530  |
| H | 1.95433  | 5.82164  | 0.96302  |
| H | 1.03774  | 6.88303  | -1.07702 |
| H | -1.13498 | 6.10580  | -1.98146 |
| H | 0.20272  | 3.15025  | 2.87235  |
| H | 0.24989  | 5.42095  | 3.91266  |
| H | 1.87520  | 5.68344  | 3.27294  |
| H | 1.59324  | 4.42461  | 4.48207  |
| H | 2.62010  | 2.65185  | 3.01830  |
| H | 2.96631  | 3.85165  | 1.76537  |
| H | 2.03750  | 2.40006  | 1.36025  |
| H | -3.14671 | 3.36996  | -0.44869 |
| H | -4.04146 | 5.63043  | 0.02755  |
| H | -4.77393 | 4.98583  | -1.44718 |
| H | -3.49537 | 6.20456  | -1.55354 |
| H | -1.84054 | 2.90232  | -2.50774 |
| H | -2.26295 | 4.48825  | -3.14931 |
| H | -3.53450 | 3.29178  | -2.85586 |
| H | -7.93739 | 2.07204  | 2.05384  |
| H | -8.19890 | 0.29153  | 3.75252  |
| H | -6.18488 | -0.84766 | 4.63108  |

|   |          |          |          |
|---|----------|----------|----------|
| H | -4.69084 | 3.31085  | 0.76680  |
| H | -5.97778 | 4.80630  | 2.26354  |
| H | -7.49543 | 4.20968  | 1.57802  |
| H | -6.36897 | 5.11514  | 0.56416  |
| H | -6.22773 | 3.23960  | -1.15037 |
| H | -7.39464 | 2.28934  | -0.21967 |
| H | -5.82520 | 1.59221  | -0.63361 |
| H | -2.74145 | -0.20326 | 3.44639  |
| H | -3.02943 | 1.08898  | 5.53803  |
| H | -2.36149 | -0.52262 | 5.85186  |
| H | -4.07098 | -0.18669 | 6.18514  |
| H | -4.14365 | -2.23120 | 2.99442  |
| H | -4.59037 | -2.26819 | 4.70867  |
| H | -2.90188 | -2.45952 | 4.23738  |
| H | 2.26902  | -6.30877 | -1.65999 |
| H | 3.40549  | -6.53433 | -2.97160 |
| H | 2.48958  | -7.88641 | -4.65114 |
| H | 0.61163  | -8.55108 | -6.12505 |
| H | -1.59643 | -7.43421 | -5.90697 |
| H | -1.90963 | -5.65375 | -4.19378 |
| H | -0.03349 | -5.01176 | -2.72729 |
| H | 3.78890  | -3.07422 | -3.75575 |
| H | 2.72341  | -4.04975 | -4.73990 |
| H | 3.49499  | -5.98188 | -5.86514 |
| H | 5.41060  | -7.35917 | -6.62328 |
| H | 7.63739  | -7.08047 | -5.55548 |
| H | 7.93910  | -5.38756 | -3.76227 |
| H | 6.02072  | -4.01184 | -3.02417 |
| H | 4.28372  | -6.33738 | 2.05550  |
| H | 2.49437  | -7.87689 | 2.78731  |
| H | 0.22136  | -7.64792 | 1.82563  |
| H | 3.80971  | -3.53636 | -0.32536 |
| H | 4.86961  | -5.53455 | -1.39642 |
| H | 5.69464  | -5.90596 | 0.12452  |

|   |          |          |          |
|---|----------|----------|----------|
| H | 6.09829  | -4.43029 | -0.75997 |
| H | 5.61599  | -2.95814 | 1.20289  |
| H | 5.35794  | -4.41572 | 2.16179  |
| H | 4.12583  | -3.14626 | 2.14067  |
| H | -0.66335 | -5.16394 | -0.79714 |
| H | -0.42033 | -7.56503 | -1.43440 |
| H | -2.10603 | -7.11924 | -1.13150 |
| H | -1.20730 | -8.04177 | 0.08004  |
| H | -1.35582 | -4.52784 | 1.51183  |
| H | -1.72755 | -6.21991 | 1.87005  |
| H | -2.66226 | -5.34420 | 0.64474  |
| H | 1.32563  | -0.89327 | -6.60078 |
| H | 3.05736  | 0.82023  | -6.20178 |
| H | 4.11373  | 0.99620  | -3.97220 |
| H | 0.11198  | -3.30600 | -4.05511 |
| H | 1.36632  | -4.32366 | -5.91863 |
| H | 0.82256  | -3.04978 | -7.01989 |
| H | -0.32909 | -4.21388 | -6.34627 |
| H | -1.27328 | -1.20830 | -4.44211 |
| H | -1.85979 | -2.61688 | -5.33437 |
| H | -0.93878 | -1.35897 | -6.16933 |
| H | 3.03369  | -0.93434 | -1.03523 |
| H | 4.69588  | -2.51164 | -1.93726 |
| H | 5.47151  | -1.41263 | -0.79426 |
| H | 5.68089  | -1.16857 | -2.54012 |
| H | 3.26931  | 1.54749  | -1.49450 |
| H | 4.94796  | 1.24882  | -1.98202 |
| H | 4.43047  | 0.87950  | -0.33640 |
| S | 0.66600  | 0.59632  | -0.24595 |
| C | 0.49514  | 1.46338  | -1.78587 |
| C | 0.97270  | 2.77531  | -1.87259 |
| C | 0.93888  | 3.44697  | -3.09190 |
| C | 0.42446  | 2.82573  | -4.22720 |
| C | -0.07575 | 1.52813  | -4.13403 |

|   |          |          |          |
|---|----------|----------|----------|
| C | -0.04402 | 0.84998  | -2.91991 |
| H | 1.36056  | 3.26821  | -0.98799 |
| H | 1.30859  | 4.46627  | -3.14148 |
| H | 0.40429  | 3.35038  | -5.17759 |
| H | -0.47983 | 1.03175  | -5.00943 |
| H | -0.42486 | -0.16124 | -2.84904 |

216

Int8

|   |          |         |         |
|---|----------|---------|---------|
| C | -3.07990 | 8.09403 | 1.84827 |
| C | -3.58831 | 6.97435 | 1.18408 |
| C | -4.90950 | 7.00628 | 0.72942 |
| C | -5.71799 | 8.11373 | 0.96989 |
| C | -5.20881 | 9.21485 | 1.65717 |
| C | -3.88377 | 9.20629 | 2.08825 |
| C | -2.70280 | 5.78595 | 0.91847 |
| N | -2.96326 | 4.63394 | 1.79828 |
| C | -3.13243 | 4.98076 | 3.21388 |
| C | -1.85388 | 5.45324 | 3.86716 |
| C | -1.80281 | 6.67045 | 4.54919 |
| C | -0.62406 | 7.09366 | 5.16306 |
| C | 0.52046  | 6.30154 | 5.10202 |
| C | 0.47657  | 5.07942 | 4.43173 |
| C | -0.70166 | 4.66178 | 3.82332 |
| C | -2.40405 | 3.41006 | 1.49374 |
| N | -2.57842 | 2.31961 | 2.28228 |
| C | -3.66156 | 2.03680 | 3.13437 |
| C | -5.01107 | 2.10806 | 2.70046 |
| C | -6.03104 | 1.77217 | 3.59339 |
| C | -5.76217 | 1.34088 | 4.88470 |
| C | -4.43915 | 1.22106 | 5.28725 |
| C | -3.38282 | 1.54979 | 4.43683 |
| C | -5.41930 | 2.50956 | 1.29657 |
| C | -6.21305 | 3.81734 | 1.31154 |
| C | -1.97101 | 1.35762 | 4.95157 |

|    |          |          |          |
|----|----------|----------|----------|
| C  | -1.72464 | -0.10661 | 5.32697  |
| Y  | -1.05011 | 0.93520  | 1.20700  |
| C  | 1.22508  | 1.48238  | 2.29328  |
| Al | 1.10802  | -0.56362 | 2.63363  |
| C  | -0.64883 | -1.19150 | 2.00151  |
| Al | -2.41601 | -1.71853 | 1.29614  |
| C  | -3.91077 | -2.05429 | 2.53001  |
| Y  | 0.37354  | -1.88502 | -0.15089 |
| C  | 0.26157  | 0.50130  | -0.94226 |
| C  | 2.13405  | -3.29710 | -1.89611 |
| N  | 1.14748  | -3.85300 | -1.15688 |
| C  | 0.80277  | -5.20748 | -0.95480 |
| C  | -0.12576 | -5.82804 | -1.82412 |
| C  | -0.48357 | -7.15784 | -1.59525 |
| C  | 0.01822  | -7.86370 | -0.50829 |
| C  | 0.86592  | -7.22173 | 0.38650  |
| C  | 1.26005  | -5.89754 | 0.18833  |
| C  | -0.72878 | -5.07982 | -2.99453 |
| C  | -2.24379 | -5.26874 | -3.09352 |
| C  | 2.09960  | -5.19776 | 1.23367  |
| C  | 1.21543  | -4.82799 | 2.43210  |
| N  | 3.08280  | -3.99857 | -2.60848 |
| C  | 4.36879  | -3.36575 | -2.89837 |
| C  | 5.41435  | -3.61067 | -1.83818 |
| C  | 5.08701  | -3.60006 | -0.48154 |
| C  | 6.07158  | -3.76308 | 0.48906  |
| C  | 7.40117  | -3.94495 | 0.11184  |
| C  | 7.73531  | -3.97054 | -1.24152 |
| C  | 6.74607  | -3.81013 | -2.20840 |
| C  | 3.17674  | -5.46728 | -2.50322 |
| C  | 4.09940  | -6.06486 | -3.53257 |
| C  | 5.29575  | -6.66320 | -3.13292 |
| C  | 6.16088  | -7.22010 | -4.07280 |
| C  | 5.83952  | -7.17803 | -5.42726 |

|   |          |          |          |
|---|----------|----------|----------|
| C | 4.64485  | -6.58471 | -5.83616 |
| C | 3.77962  | -6.03671 | -4.89421 |
| N | 2.12475  | -1.95209 | -1.80170 |
| C | 2.58929  | -0.98623 | -2.72027 |
| C | 3.55921  | -0.03375 | -2.31547 |
| C | 3.82346  | 1.06731  | -3.13168 |
| C | 3.19153  | 1.23381  | -4.35611 |
| C | 2.30077  | 0.25957  | -4.78619 |
| C | 1.98543  | -0.84711 | -3.99475 |
| C | 4.38376  | -0.20525 | -1.05655 |
| C | 4.10720  | 0.89239  | -0.02783 |
| C | 1.04026  | -1.88520 | -4.56198 |
| C | -0.22591 | -1.26879 | -5.16558 |
| C | 5.88257  | -0.26231 | -1.37611 |
| C | 1.77565  | -2.72500 | -5.61456 |
| C | -1.47541 | -1.88397 | -2.08976 |
| O | -2.37812 | -1.86341 | -2.77637 |
| C | -2.05141 | -3.43719 | 0.23037  |
| C | -0.05231 | -5.45236 | -4.31549 |
| C | 3.32600  | -5.99624 | 1.67460  |
| C | 1.69254  | -0.84655 | 4.49874  |
| C | 2.52177  | -1.58433 | 1.54741  |
| C | -3.05041 | -0.19844 | 0.02962  |
| N | -1.58904 | 3.14646  | 0.46152  |
| C | -1.19279 | 3.95039  | -0.62777 |
| C | -1.93689 | 3.85689  | -1.82848 |
| C | -1.54940 | 4.61444  | -2.93412 |
| C | -0.43147 | 5.43889  | -2.88543 |
| C | 0.32742  | 5.48100  | -1.72268 |
| C | -0.02272 | 4.74008  | -0.59125 |
| C | -3.14590 | 2.95063  | -1.93338 |
| C | -2.95588 | 1.89775  | -3.02973 |
| C | 0.89940  | 4.76086  | 0.61017  |
| C | 1.10619  | 6.15870  | 1.19995  |

|   |          |          |          |
|---|----------|----------|----------|
| C | -4.43785 | 3.74505  | -2.13997 |
| C | 2.25022  | 4.14193  | 0.22757  |
| C | -6.23545 | 1.40630  | 0.61010  |
| C | -1.66688 | 2.28935  | 6.12923  |
| H | -0.74409 | 3.70074  | 3.32564  |
| H | 2.79308  | 4.79268  | -0.46670 |
| H | 1.22051  | 6.09938  | -1.69023 |
| H | 0.19640  | 0.13722  | -1.97829 |
| H | -0.22513 | 1.48982  | -1.03548 |
| H | 1.32793  | 0.74544  | -0.82966 |
| H | -0.61068 | -2.07890 | 2.66855  |
| H | -3.57359 | 0.62209  | 0.53909  |
| H | -2.50371 | 0.23767  | -0.81876 |
| H | -3.85313 | -0.77608 | -0.44376 |
| H | -2.12616 | -4.14905 | 1.06582  |
| H | -2.94424 | -3.60010 | -0.38693 |
| H | -1.22797 | -3.84604 | -0.37292 |
| H | -4.20606 | -1.11897 | 3.02316  |
| H | -3.64538 | -2.76408 | 3.32383  |
| H | -4.80146 | -2.45183 | 2.02580  |
| H | 3.40810  | -0.99454 | 1.81009  |
| H | 2.70206  | -1.79819 | 0.48364  |
| H | 2.63046  | -2.53276 | 2.08651  |
| H | 0.65607  | 2.10056  | 3.00668  |
| H | 2.26315  | 1.57353  | 2.63589  |
| H | 1.24179  | 2.01373  | 1.33117  |
| H | 2.78233  | -0.97113 | 4.55774  |
| H | 1.24368  | -1.74256 | 4.94532  |
| H | 1.43384  | -0.00284 | 5.14990  |
| H | -2.84875 | 5.46245  | -0.10993 |
| H | -1.65933 | 6.10048  | 1.00827  |
| H | -2.04756 | 8.08614  | 2.18516  |
| H | -3.47340 | 10.06714 | 2.60842  |
| H | -5.83834 | 10.08000 | 1.84402  |

|   |          |         |          |
|---|----------|---------|----------|
| H | -6.74356 | 8.12085 | 0.61215  |
| H | -5.30340 | 6.15897 | 0.17940  |
| H | -3.52930 | 4.11575 | 3.74517  |
| H | -3.89244 | 5.76278 | 3.27376  |
| H | 1.35856  | 4.44697 | 4.38349  |
| H | 1.43945  | 6.63192 | 5.57730  |
| H | -0.60035 | 8.04521 | 5.68670  |
| H | -2.69224 | 7.29350 | 4.59119  |
| H | -0.14445 | 6.02900 | -3.75080 |
| H | -2.13459 | 4.55459 | -3.84814 |
| H | 0.44282  | 4.13982 | 1.38528  |
| H | 0.17775  | 6.57590 | 1.59822  |
| H | 1.49947  | 6.85379 | 0.45073  |
| H | 1.81842  | 6.11740 | 2.02931  |
| H | 2.87784  | 3.99318 | 1.11237  |
| H | 2.11963  | 3.17757 | -0.27093 |
| H | -3.23419 | 2.42051 | -0.98270 |
| H | -4.59536 | 4.45491 | -1.32280 |
| H | -5.30357 | 3.07547 | -2.17539 |
| H | -4.41260 | 4.31417 | -3.07550 |
| H | -2.02037 | 1.34901 | -2.88300 |
| H | -2.91507 | 2.35535 | -4.02405 |
| H | -3.78254 | 1.17962 | -3.02260 |
| H | -7.06249 | 1.83829 | 3.25815  |
| H | -6.57183 | 1.08467 | 5.56148  |
| H | -4.21441 | 0.86019 | 6.28689  |
| H | -4.51508 | 2.67214 | 0.70400  |
| H | -5.64283 | 4.61560 | 1.78861  |
| H | -7.15111 | 3.69536 | 1.86346  |
| H | -6.46795 | 4.12885 | 0.29259  |
| H | -6.39505 | 1.65106 | -0.44555 |
| H | -7.22017 | 1.29695 | 1.07602  |
| H | -5.73425 | 0.43805 | 0.66879  |
| H | -1.28234 | 1.61790 | 4.14051  |



|   |          |          |          |
|---|----------|----------|----------|
| H | -1.84904 | 3.33539  | 5.87082  |
| H | -0.61913 | 2.19230  | 6.43362  |
| H | -2.29055 | 2.03991  | 6.99468  |
| H | -1.86664 | -0.75617 | 4.46021  |
| H | -2.40764 | -0.42852 | 6.12005  |
| H | -0.70261 | -0.24358 | 5.68797  |
| H | 2.18422  | -5.89258 | -2.62512 |
| H | 3.52595  | -5.74905 | -1.50358 |
| H | 5.55704  | -6.67400 | -2.07873 |
| H | 7.08900  | -7.67957 | -3.74558 |
| H | 6.51445  | -7.60678 | -6.16232 |
| H | 4.38543  | -6.55230 | -6.89044 |
| H | 2.85260  | -5.57455 | -5.21787 |
| H | 4.21673  | -2.29607 | -3.03205 |
| H | 4.72739  | -3.74740 | -3.85711 |
| H | 7.00413  | -3.84933 | -3.26357 |
| H | 8.76710  | -4.12293 | -1.54506 |
| H | 8.17093  | -4.07205 | 0.86734  |
| H | 5.79676  | -3.74506 | 1.53936  |
| H | 4.05653  | -3.45416 | -0.17813 |
| H | 1.22563  | -7.75668 | 1.26089  |
| H | -0.26852 | -8.89859 | -0.34670 |
| H | -1.17438 | -7.64533 | -2.27706 |
| H | 2.45999  | -4.26839 | 0.78637  |
| H | 3.97031  | -6.23851 | 0.82442  |
| H | 3.04781  | -6.93316 | 2.16789  |
| H | 3.91749  | -5.41445 | 2.38875  |
| H | 1.78006  | -4.28127 | 3.19428  |
| H | 0.79817  | -5.72840 | 2.89521  |
| H | 0.36896  | -4.20237 | 2.12702  |
| H | -0.52777 | -4.01840 | -2.81637 |
| H | 1.00118  | -5.16913 | -4.30678 |
| H | -0.53058 | -4.93611 | -5.15437 |
| H | -0.11689 | -6.53054 | -4.49717 |

|   |          |          |          |
|---|----------|----------|----------|
| H | -2.73279 | -5.06478 | -2.13785 |
| H | -2.50398 | -6.28922 | -3.39309 |
| H | -2.66021 | -4.59361 | -3.84829 |
| H | 1.82765  | 0.36245  | -5.75859 |
| H | 3.40490  | 2.09915  | -4.97639 |
| H | 4.55337  | 1.80108  | -2.80067 |
| H | 0.73644  | -2.54982 | -3.74691 |
| H | 2.62958  | -3.24301 | -5.17222 |
| H | 2.14970  | -2.08083 | -6.41741 |
| H | 1.11179  | -3.47082 | -6.06210 |
| H | -0.68663 | -0.54423 | -4.48900 |
| H | -0.96076 | -2.04811 | -5.39292 |
| H | -0.00841 | -0.74596 | -6.10231 |
| H | 4.11019  | -1.16582 | -0.61847 |
| H | 6.10143  | -0.99569 | -2.15528 |
| H | 6.44742  | -0.55027 | -0.48377 |
| H | 6.25656  | 0.71005  | -1.71447 |
| H | 3.06474  | 0.88712  | 0.29478  |
| H | 4.32712  | 1.88161  | -0.44213 |
| H | 4.73350  | 0.75669  | 0.86088  |

216

TS6

|   |          |         |         |
|---|----------|---------|---------|
| C | -2.92992 | 8.17467 | 2.58804 |
| C | -3.47093 | 7.33889 | 1.60683 |
| C | -4.75338 | 7.60681 | 1.12015 |
| C | -5.49070 | 8.67733 | 1.61901 |
| C | -4.94831 | 9.49793 | 2.60729 |
| C | -3.66422 | 9.24726 | 3.08786 |
| C | -2.68172 | 6.16881 | 1.08805 |
| N | -3.06120 | 4.89260 | 1.72409 |
| C | -3.37396 | 4.99244 | 3.14713 |
| C | -2.17515 | 5.24447 | 4.02776 |
| C | -2.36147 | 5.78687 | 5.30242 |
| C | -1.28250 | 5.95366 | 6.16627 |

|    |          |          |          |
|----|----------|----------|----------|
| C  | 0.00269  | 5.58985  | 5.76319  |
| C  | 0.19835  | 5.06393  | 4.48853  |
| C  | -0.88506 | 4.89429  | 3.62989  |
| C  | -2.52808 | 3.71715  | 1.24977  |
| N  | -2.74665 | 2.52286  | 1.85772  |
| C  | -3.84248 | 2.13648  | 2.65461  |
| C  | -5.18639 | 2.33857  | 2.24399  |
| C  | -6.22204 | 1.92741  | 3.08588  |
| C  | -5.97457 | 1.30355  | 4.30012  |
| C  | -4.65944 | 1.05343  | 4.66708  |
| C  | -3.58651 | 1.43936  | 3.86218  |
| C  | -5.57519 | 2.97103  | 0.92184  |
| C  | -6.33252 | 4.28567  | 1.13282  |
| C  | -2.18914 | 1.08228  | 4.32595  |
| C  | -2.07325 | -0.42247 | 4.58394  |
| Y  | -1.19876 | 1.32169  | 0.68666  |
| C  | 0.96078  | 1.80501  | 1.95832  |
| Al | 0.91345  | -0.28565 | 2.04964  |
| C  | -0.80338 | -0.88293 | 1.25170  |
| Al | -2.53918 | -1.30946 | 0.38777  |
| C  | -4.04624 | -1.88492 | 1.51028  |
| Y  | 0.26393  | -1.73463 | -0.82441 |
| C  | 0.40734  | 1.03714  | -1.50947 |
| C  | 2.18551  | -3.34606 | -2.11178 |
| N  | 1.19348  | -3.79406 | -1.31439 |
| C  | 0.89552  | -5.09097 | -0.83724 |
| C  | -0.05038 | -5.88345 | -1.53174 |
| C  | -0.38025 | -7.13989 | -1.01875 |
| C  | 0.17526  | -7.60766 | 0.16645  |
| C  | 1.06403  | -6.80169 | 0.86697  |
| C  | 1.43063  | -5.54255 | 0.38854  |
| C  | -0.67082 | -5.42126 | -2.83562 |
| C  | -2.16403 | -5.73962 | -2.93636 |
| C  | 2.34201  | -4.66292 | 1.21568  |

|   |          |          |          |
|---|----------|----------|----------|
| C | 1.56807  | -4.09515 | 2.41057  |
| N | 3.15741  | -4.12288 | -2.69553 |
| C | 4.41050  | -3.48982 | -3.10635 |
| C | 5.45833  | -3.47969 | -2.01969 |
| C | 5.13847  | -3.09359 | -0.71599 |
| C | 6.11939  | -3.03835 | 0.26921  |
| C | 7.43749  | -3.37569 | -0.03660 |
| C | 7.76381  | -3.77170 | -1.33240 |
| C | 6.77773  | -3.82687 | -2.31543 |
| C | 3.31409  | -5.54218 | -2.33694 |
| C | 4.21343  | -6.28562 | -3.28929 |
| C | 5.41605  | -6.82597 | -2.83074 |
| C | 6.26014  | -7.51951 | -3.69623 |
| C | 5.91157  | -7.67263 | -5.03583 |
| C | 4.71168  | -7.13561 | -5.50320 |
| C | 3.86735  | -6.45117 | -4.63455 |
| N | 2.15705  | -2.00174 | -2.24008 |
| C | 2.46239  | -1.21161 | -3.36785 |
| C | 3.33599  | -0.10362 | -3.21744 |
| C | 3.41518  | 0.84638  | -4.23815 |
| C | 2.69324  | 0.70583  | -5.41688 |
| C | 1.91811  | -0.43279 | -5.59904 |
| C | 1.79205  | -1.40239 | -4.60286 |
| C | 4.26607  | 0.02557  | -2.02633 |
| C | 4.05216  | 1.30891  | -1.22195 |
| C | 0.99874  | -2.65706 | -4.91152 |
| C | -0.42412 | -2.38437 | -5.40557 |
| C | 5.73071  | -0.07201 | -2.47379 |
| C | 1.77833  | -3.49890 | -5.93000 |
| C | -0.51772 | -0.26165 | -2.51130 |
| O | -1.07455 | 0.27348  | -3.40746 |
| C | -2.12078 | -2.76847 | -1.01847 |
| C | 0.07840  | -6.01011 | -4.03412 |
| C | 3.61736  | -5.36970 | 1.67696  |

|   |          |          |          |
|---|----------|----------|----------|
| C | 1.37580  | -0.69874 | 3.92603  |
| C | 2.46909  | -0.94046 | 0.92167  |
| C | -3.14029 | 0.36240  | -0.68106 |
| N | -1.67304 | 3.59993  | 0.21600  |
| C | -1.31000 | 4.51753  | -0.79645 |
| C | -2.13080 | 4.62352  | -1.94560 |
| C | -1.76101 | 5.49459  | -2.97180 |
| C | -0.58941 | 6.23766  | -2.90367 |
| C | 0.24088  | 6.08564  | -1.80107 |
| C | -0.08974 | 5.22946  | -0.74842 |
| C | -3.40812 | 3.82344  | -2.09026 |
| C | -3.40009 | 2.96252  | -3.35651 |
| C | 0.90145  | 5.06019  | 0.38291  |
| C | 1.22097  | 6.36820  | 1.11174  |
| C | -4.63721 | 4.73507  | -2.05062 |
| C | 2.18845  | 4.41095  | -0.14084 |
| C | -6.41041 | 2.00438  | 0.07225  |
| C | -1.77186 | 1.89213  | 5.55715  |
| H | -0.72451 | 4.48250  | 2.64154  |
| H | 2.71518  | 5.08430  | -0.82526 |
| H | 1.17400  | 6.64068  | -1.75382 |
| H | 1.15369  | 1.21731  | -2.28743 |
| H | -0.22056 | 1.94400  | -1.51705 |
| H | 0.99797  | 0.95697  | -0.58139 |
| H | -0.84608 | -1.79086 | 1.89080  |
| H | -3.73554 | 1.09349  | -0.11934 |
| H | -2.58208 | 0.90546  | -1.45724 |
| H | -3.87397 | -0.19819 | -1.27388 |
| H | -1.67355 | -3.69625 | -0.62615 |
| H | -3.17047 | -3.03480 | -1.19537 |
| H | -1.74222 | -2.61078 | -2.04213 |
| H | -4.36245 | -1.06579 | 2.16862  |
| H | -3.79118 | -2.73538 | 2.15524  |
| H | -4.92259 | -2.18169 | 0.91911  |

|   |          |          |          |
|---|----------|----------|----------|
| H | 3.23192  | -0.17598 | 1.12218  |
| H | 2.57453  | -1.10496 | -0.15991 |
| H | 2.83182  | -1.85608 | 1.40278  |
| H | 0.29680  | 2.37359  | 2.63039  |
| H | 1.92471  | 1.81419  | 2.48221  |
| H | 1.15363  | 2.42442  | 1.07304  |
| H | 2.46759  | -0.75222 | 4.04162  |
| H | 0.97283  | -1.65496 | 4.27864  |
| H | 1.02289  | 0.07455  | 4.61933  |
| H | -2.83689 | 6.07709  | 0.01494  |
| H | -1.61575 | 6.35942  | 1.24291  |
| H | -1.93526 | 7.96780  | 2.97291  |
| H | -3.23349 | 9.88642  | 3.85311  |
| H | -5.52248 | 10.33373 | 2.99647  |
| H | -6.48651 | 8.87432  | 1.23270  |
| H | -5.17401 | 6.97134  | 0.34695  |
| H | -3.87099 | 4.07989  | 3.47279  |
| H | -4.10141 | 5.79671  | 3.27451  |
| H | 1.19266  | 4.77787  | 4.15819  |
| H | 0.84383  | 5.71861  | 6.43779  |
| H | -1.44394 | 6.37131  | 7.15597  |
| H | -3.36095 | 6.07589  | 5.61826  |
| H | -0.31790 | 6.91396  | -3.70877 |
| H | -2.40429 | 5.58473  | -3.84286 |
| H | 0.45197  | 4.37559  | 1.10569  |
| H | 0.32879  | 6.81754  | 1.55602  |
| H | 1.66310  | 7.10448  | 0.43278  |
| H | 1.93676  | 6.18820  | 1.92034  |
| H | 2.86885  | 4.16659  | 0.68178  |
| H | 1.97160  | 3.49273  | -0.69425 |
| H | -3.46555 | 3.14442  | -1.23661 |
| H | -4.68237 | 5.29372  | -1.11202 |
| H | -5.55844 | 4.15062  | -2.13906 |
| H | -4.61772 | 5.45923  | -2.87199 |

|   |          |          |          |
|---|----------|----------|----------|
| H | -2.51301 | 2.32563  | -3.40456 |
| H | -3.41638 | 3.57990  | -4.26125 |
| H | -4.28394 | 2.31626  | -3.37919 |
| H | -7.24853 | 2.09626  | 2.77246  |
| H | -6.79538 | 0.99880  | 4.94246  |
| H | -4.45420 | 0.54148  | 5.60242  |
| H | -4.66410 | 3.19622  | 0.36396  |
| H | -5.72600 | 5.00956  | 1.68009  |
| H | -7.25346 | 4.11812  | 1.70092  |
| H | -6.61294 | 4.72982  | 0.17255  |
| H | -6.58371 | 2.42248  | -0.92484 |
| H | -7.38839 | 1.82056  | 0.52873  |
| H | -5.91240 | 1.03872  | -0.04162 |
| H | -1.48983 | 1.33541  | 3.52241  |
| H | -1.82751 | 2.96611  | 5.36847  |
| H | -0.74342 | 1.64748  | 5.84325  |
| H | -2.42062 | 1.66289  | 6.40999  |
| H | -2.33304 | -0.98794 | 3.68683  |
| H | -2.73592 | -0.73790 | 5.39633  |
| H | -1.05198 | -0.68259 | 4.86647  |
| H | 2.33356  | -6.01173 | -2.32645 |
| H | 3.72183  | -5.62591 | -1.32344 |
| H | 5.69925  | -6.68428 | -1.79166 |
| H | 7.19320  | -7.93248 | -3.32395 |
| H | 6.57009  | -8.20759 | -5.71395 |
| H | 4.43209  | -7.25238 | -6.54631 |
| H | 2.93921  | -6.02910 | -5.00474 |
| H | 4.19949  | -2.47500 | -3.44025 |
| H | 4.79236  | -4.02900 | -3.97592 |
| H | 7.02859  | -4.15394 | -3.32111 |
| H | 8.78624  | -4.04475 | -1.57763 |
| H | 8.20443  | -3.33393 | 0.73132  |
| H | 5.85173  | -2.72695 | 1.27468  |
| H | 4.11919  | -2.81675 | -0.47241 |

|   |          |          |          |
|---|----------|----------|----------|
| H | 1.47905  | -7.15233 | 1.80773  |
| H | -0.09435 | -8.58803 | 0.54815  |
| H | -1.08839 | -7.76172 | -1.55801 |
| H | 2.64209  | -3.82413 | 0.58312  |
| H | 4.18968  | -5.76036 | 0.83080  |
| H | 3.39798  | -6.20411 | 2.35092  |
| H | 4.26169  | -4.67021 | 2.21814  |
| H | 2.19130  | -3.42124 | 3.00532  |
| H | 1.21608  | -4.90150 | 3.06278  |
| H | 0.68692  | -3.53289 | 2.08321  |
| H | -0.55706 | -4.33418 | -2.87784 |
| H | 1.10941  | -5.65481 | -4.06342 |
| H | -0.40210 | -5.71720 | -4.97326 |
| H | 0.09482  | -7.10425 | -3.98554 |
| H | -2.70602 | -5.40413 | -2.04912 |
| H | -2.34353 | -6.81296 | -3.06015 |
| H | -2.59266 | -5.23651 | -3.80914 |
| H | 1.38496  | -0.57158 | -6.53546 |
| H | 2.75662  | 1.45914  | -6.19641 |
| H | 4.07149  | 1.70304  | -4.10871 |
| H | 0.91076  | -3.24219 | -3.99417 |
| H | 2.77226  | -3.75062 | -5.55066 |
| H | 1.90829  | -2.94681 | -6.86683 |
| H | 1.24899  | -4.42869 | -6.16049 |
| H | -0.98192 | -1.76551 | -4.70083 |
| H | -0.95883 | -3.33058 | -5.54302 |
| H | -0.42354 | -1.86671 | -6.37064 |
| H | 4.06893  | -0.82327 | -1.36983 |
| H | 5.91074  | -0.96488 | -3.07703 |
| H | 6.39094  | -0.12381 | -1.60208 |
| H | 6.02062  | 0.79932  | -3.07120 |
| H | 3.04617  | 1.36185  | -0.80360 |
| H | 4.20217  | 2.19890  | -1.84253 |
| H | 4.76265  | 1.36045  | -0.38995 |



216

Int9

|    |          |          |         |
|----|----------|----------|---------|
| C  | -2.88264 | 7.96948  | 3.16883 |
| C  | -3.43374 | 7.16940  | 2.16450 |
| C  | -4.71875 | 7.46021  | 1.69739 |
| C  | -5.44918 | 8.51390  | 2.23937 |
| C  | -4.89651 | 9.29781  | 3.25181 |
| C  | -3.60917 | 9.02711  | 3.71100 |
| C  | -2.64998 | 6.01846  | 1.59470 |
| N  | -3.08998 | 4.71113  | 2.11069 |
| C  | -3.46047 | 4.70584  | 3.52349 |
| C  | -2.32835 | 5.08158  | 4.44849 |
| C  | -2.60722 | 5.69237  | 5.67328 |
| C  | -1.57977 | 6.01402  | 6.55562 |
| C  | -0.25453 | 5.73680  | 6.21966 |
| C  | 0.03218  | 5.13353  | 4.99716 |
| C  | -0.99968 | 4.80846  | 4.11989 |
| C  | -2.54108 | 3.57122  | 1.56175 |
| N  | -2.82136 | 2.32387  | 2.00661 |
| C  | -3.97439 | 1.87843  | 2.67683 |
| C  | -5.28978 | 2.20229  | 2.25162 |
| C  | -6.37924 | 1.70618  | 2.97304 |
| C  | -6.21544 | 0.87204  | 4.06785 |
| C  | -4.92924 | 0.49297  | 4.43252 |
| C  | -3.80762 | 0.96494  | 3.75190 |
| C  | -5.59767 | 3.02535  | 1.01589 |
| C  | -6.39242 | 4.28787  | 1.35819 |
| C  | -2.43118 | 0.51513  | 4.19472 |
| C  | -2.41477 | -0.91776 | 4.72664 |
| Y  | -1.20571 | 1.21153  | 0.70503 |
| C  | 0.79679  | 1.56826  | 2.26514 |
| AI | 0.77145  | -0.50916 | 2.30699 |
| C  | -0.80005 | -1.21162 | 1.34076 |
| AI | -2.24720 | -1.56180 | 0.04300 |

|   |          |          |          |
|---|----------|----------|----------|
| C | -3.67576 | -2.78609 | 0.61102  |
| Y | 0.69974  | -1.77490 | -0.41786 |
| C | 0.56145  | 2.19813  | -2.56720 |
| C | 2.34402  | -3.58309 | -1.85179 |
| N | 1.46127  | -3.93895 | -0.89515 |
| C | 1.21336  | -5.19427 | -0.28763 |
| C | 0.20281  | -6.03270 | -0.81299 |
| C | -0.10199 | -7.22542 | -0.15440 |
| C | 0.56050  | -7.59872 | 1.00837  |
| C | 1.54353  | -6.76445 | 1.52636  |
| C | 1.88311  | -5.56489 | 0.89822  |
| C | -0.54652 | -5.67978 | -2.08034 |
| C | -2.03261 | -5.44277 | -1.79534 |
| C | 2.91852  | -4.66080 | 1.52771  |
| C | 2.31160  | -3.95191 | 2.74123  |
| N | 3.23530  | -4.42283 | -2.47751 |
| C | 4.46497  | -3.85927 | -3.03579 |
| C | 5.59142  | -3.77359 | -2.03382 |
| C | 5.38324  | -3.21990 | -0.76800 |
| C | 6.43150  | -3.10085 | 0.13821  |
| C | 7.70930  | -3.53778 | -0.21014 |
| C | 7.92712  | -4.09311 | -1.46931 |
| C | 6.87248  | -4.21249 | -2.37315 |
| C | 3.37164  | -5.82675 | -2.05718 |
| C | 4.12229  | -6.66684 | -3.05564 |
| C | 5.38898  | -7.16504 | -2.74431 |
| C | 6.09022  | -7.94569 | -3.66161 |
| C | 5.53015  | -8.23449 | -4.90399 |
| C | 4.26146  | -7.74831 | -5.22013 |
| C | 3.56176  | -6.97460 | -4.29914 |
| N | 2.29944  | -2.25633 | -2.10040 |
| C | 2.55671  | -1.56540 | -3.29639 |
| C | 3.43302  | -0.45014 | -3.26697 |
| C | 3.56679  | 0.34891  | -4.40367 |

|   |          |          |          |
|---|----------|----------|----------|
| C | 2.87415  | 0.06762  | -5.57485 |
| C | 2.03728  | -1.04118 | -5.61024 |
| C | 1.85705  | -1.86190 | -4.49505 |
| C | 4.26817  | -0.12759 | -2.04480 |
| C | 3.92363  | 1.24525  | -1.45930 |
| C | 0.93677  | -3.05831 | -4.61781 |
| C | -0.44734 | -2.69515 | -5.16279 |
| C | 5.76716  | -0.21713 | -2.35196 |
| C | 1.58244  | -4.14402 | -5.48384 |
| C | 0.03457  | 1.55951  | -1.33544 |
| O | 0.45542  | 0.39408  | -1.05841 |
| C | -1.41176 | -2.05136 | -1.81007 |
| C | -0.36120 | -6.73737 | -3.17273 |
| C | 4.21461  | -5.38356 | 1.89669  |
| C | 1.14847  | -1.02606 | 4.17449  |
| C | 2.49206  | -0.85558 | 1.16873  |
| C | -3.11957 | 0.21075  | -0.62240 |
| N | -1.61285 | 3.55041  | 0.59467  |
| C | -1.18905 | 4.48568  | -0.36313 |
| C | -1.95298 | 4.66116  | -1.54522 |
| C | -1.48149 | 5.50682  | -2.55011 |
| C | -0.26156 | 6.16230  | -2.43457 |
| C | 0.50315  | 5.95748  | -1.29314 |
| C | 0.06744  | 5.12712  | -0.25742 |
| C | -3.27864 | 3.95611  | -1.74673 |
| C | -3.31657 | 3.13584  | -3.03877 |
| C | 0.98108  | 4.91485  | 0.93122  |
| C | 1.27350  | 6.21354  | 1.68894  |
| C | -4.43927 | 4.95490  | -1.70982 |
| C | 2.29333  | 4.25086  | 0.49702  |
| C | -6.34969 | 2.18557  | -0.02472 |
| C | -1.83623 | 1.49388  | 5.20864  |
| H | -0.77088 | 4.33910  | 3.16958  |
| H | 2.87990  | 4.91805  | -0.14366 |

|   |          |          |          |
|---|----------|----------|----------|
| H | 1.46608  | 6.45298  | -1.19933 |
| H | 1.26904  | 1.57528  | -3.12421 |
| H | -0.29359 | 2.47935  | -3.19275 |
| H | 1.00778  | 3.15962  | -2.28294 |
| H | -1.30113 | -1.67972 | 2.20577  |
| H | -3.69372 | 0.82371  | 0.08782  |
| H | -2.63937 | 0.89039  | -1.34893 |
| H | -3.88447 | -0.29806 | -1.22068 |
| H | -0.83442 | -2.95633 | -2.04812 |
| H | -2.38663 | -2.25806 | -2.26704 |
| H | -0.99859 | -1.22649 | -2.41036 |
| H | -4.28146 | -2.31696 | 1.39752  |
| H | -3.27696 | -3.71806 | 1.02962  |
| H | -4.36178 | -3.06014 | -0.20056 |
| H | 3.15018  | -0.46994 | 1.95681  |
| H | 2.72603  | -0.22813 | 0.29925  |
| H | 2.89916  | -1.86048 | 0.97340  |
| H | 0.02932  | 2.13912  | 2.81367  |
| H | 1.68668  | 1.65565  | 2.89995  |
| H | 1.07071  | 2.14035  | 1.36623  |
| H | 2.23114  | -1.02549 | 4.36071  |
| H | 0.78391  | -2.02436 | 4.43919  |
| H | 0.71034  | -0.32008 | 4.88943  |
| H | -2.75494 | 6.01105  | 0.51083  |
| H | -1.58752 | 6.16899  | 1.80888  |
| H | -1.88531 | 7.74887  | 3.53753  |
| H | -3.16921 | 9.63729  | 4.49443  |
| H | -5.46514 | 10.12066 | 3.67539  |
| H | -6.44752 | 8.72668  | 1.86806  |
| H | -5.14806 | 6.85425  | 0.90621  |
| H | -3.83864 | 3.71800  | 3.78680  |
| H | -4.29078 | 5.40286  | 3.66505  |
| H | 1.05911  | 4.91184  | 4.72244  |
| H | 0.54794  | 5.99224  | 6.90537  |

|   |          |          |          |
|---|----------|----------|----------|
| H | -1.81224 | 6.49012  | 7.50400  |
| H | -3.63728 | 5.92915  | 5.92781  |
| H | 0.09098  | 6.81734  | -3.22572 |
| H | -2.08193 | 5.64754  | -3.44521 |
| H | 0.46917  | 4.22937  | 1.61088  |
| H | 0.36028  | 6.67786  | 2.07022  |
| H | 1.77344  | 6.94360  | 1.04382  |
| H | 1.92948  | 6.02011  | 2.54388  |
| H | 2.90720  | 3.99392  | 1.36666  |
| H | 2.11053  | 3.33400  | -0.07006 |
| H | -3.40418 | 3.25320  | -0.91944 |
| H | -4.47766 | 5.47968  | -0.75208 |
| H | -5.39809 | 4.44809  | -1.85422 |
| H | -4.33241 | 5.70730  | -2.49841 |
| H | -2.49855 | 2.41110  | -3.07057 |
| H | -3.23607 | 3.77113  | -3.92717 |
| H | -4.25825 | 2.58159  | -3.10747 |
| H | -7.38264 | 1.97152  | 2.65105  |
| H | -7.07691 | 0.50134  | 4.61540  |
| H | -4.79244 | -0.18881 | 5.26503  |
| H | -4.65618 | 3.34007  | 0.56646  |
| H | -5.85592 | 4.91150  | 2.07543  |
| H | -7.36589 | 4.03671  | 1.79210  |
| H | -6.57861 | 4.88243  | 0.45768  |
| H | -6.53406 | 2.77023  | -0.93215 |
| H | -7.32033 | 1.85613  | 0.35988  |
| H | -5.78243 | 1.29431  | -0.30288 |
| H | -1.78256 | 0.52049  | 3.31090  |
| H | -1.78169 | 2.50326  | 4.79850  |
| H | -0.82488 | 1.19154  | 5.49906  |
| H | -2.45442 | 1.53107  | 6.11260  |
| H | -2.91300 | -1.60235 | 4.03356  |
| H | -2.90935 | -0.99796 | 5.70066  |
| H | -1.38484 | -1.25396 | 4.85871  |

|   |          |          |          |
|---|----------|----------|----------|
| H | 2.37723  | -6.24276 | -1.91799 |
| H | 3.88142  | -5.87938 | -1.08842 |
| H | 5.83191  | -6.92468 | -1.78214 |
| H | 7.07536  | -8.32493 | -3.40563 |
| H | 6.07629  | -8.83986 | -5.62157 |
| H | 3.81443  | -7.97695 | -6.18332 |
| H | 2.57584  | -6.59629 | -4.54666 |
| H | 4.25053  | -2.87297 | -3.44534 |
| H | 4.76981  | -4.48621 | -3.87684 |
| H | 7.03916  | -4.66136 | -3.34886 |
| H | 8.91811  | -4.44041 | -1.74752 |
| H | 8.52940  | -3.44633 | 0.49597  |
| H | 6.25020  | -2.66105 | 1.11465  |
| H | 4.39644  | -2.85911 | -0.50225 |
| H | 2.05730  | -7.04632 | 2.44108  |
| H | 0.31000  | -8.52934 | 1.50902  |
| H | -0.87422 | -7.87152 | -0.56318 |
| H | 3.17315  | -3.90175 | 0.78367  |
| H | 4.66585  | -5.86887 | 1.02633  |
| H | 4.04866  | -6.14809 | 2.66246  |
| H | 4.94442  | -4.67197 | 2.29434  |
| H | 3.00318  | -3.21576 | 3.16196  |
| H | 2.06257  | -4.67441 | 3.52588  |
| H | 1.38521  | -3.43230 | 2.47509  |
| H | -0.11916 | -4.74681 | -2.45558 |
| H | 0.69674  | -6.91535 | -3.38453 |
| H | -0.84601 | -6.41719 | -4.10119 |
| H | -0.80359 | -7.69568 | -2.88095 |
| H | -2.17419 | -4.68745 | -1.01873 |
| H | -2.51703 | -6.36403 | -1.45449 |
| H | -2.55102 | -5.10540 | -2.69944 |
| H | 1.50036  | -1.27546 | -6.52553 |
| H | 2.99183  | 0.69767  | -6.45154 |
| H | 4.23838  | 1.20285  | -4.36908 |

|   |          |          |          |
|---|----------|----------|----------|
| H | 0.79260  | -3.47140 | -3.61700 |
| H | 2.56440  | -4.42104 | -5.09657 |
| H | 1.71211  | -3.79084 | -6.51281 |
| H | 0.95482  | -5.04159 | -5.51317 |
| H | -0.90351 | -1.88703 | -4.58716 |
| H | -1.11188 | -3.56453 | -5.11256 |
| H | -0.39737 | -2.38026 | -6.21039 |
| H | 4.03638  | -0.88585 | -1.29319 |
| H | 6.03169  | -1.18759 | -2.77827 |
| H | 6.35308  | -0.08690 | -1.43628 |
| H | 6.07287  | 0.55933  | -3.06184 |
| H | 2.86479  | 1.30913  | -1.20033 |
| H | 4.13794  | 2.04739  | -2.17393 |
| H | 4.50937  | 1.43878  | -0.55427 |

216

Int8 without disperion

|   |         |          |          |
|---|---------|----------|----------|
| C | 5.25934 | -7.11691 | -3.15990 |
| C | 4.21030 | -6.27651 | -3.54599 |
| C | 3.92185 | -6.15735 | -4.91130 |
| C | 4.66600 | -6.85177 | -5.86231 |
| C | 5.70718 | -7.68953 | -5.46324 |
| C | 5.99938 | -7.82259 | -4.10771 |
| C | 3.37163 | -5.59474 | -2.48410 |
| N | 3.31466 | -4.12472 | -2.58376 |
| C | 4.61917 | -3.52416 | -2.87948 |
| C | 5.71689 | -3.84878 | -1.88359 |
| C | 5.50256 | -3.80263 | -0.50236 |
| C | 6.54818 | -4.03767 | 0.38926  |
| C | 7.82811 | -4.31823 | -0.08761 |
| C | 8.05265 | -4.36854 | -1.46227 |
| C | 7.00272 | -4.14203 | -2.35040 |
| C | 2.30249 | -3.38854 | -1.98454 |
| N | 2.25596 | -2.03286 | -1.99734 |
| C | 2.77776 | -1.13804 | -2.97615 |

|    |          |          |          |
|----|----------|----------|----------|
| C  | 3.81075  | -0.21123 | -2.64723 |
| C  | 4.19491  | 0.75861  | -3.57808 |
| C  | 3.62268  | 0.83605  | -4.83873 |
| C  | 2.63431  | -0.07728 | -5.17278 |
| C  | 2.18856  | -1.04808 | -4.27031 |
| C  | 4.56446  | -0.23553 | -1.32686 |
| C  | 6.08868  | -0.27937 | -1.51762 |
| C  | 1.08684  | -1.97950 | -4.74472 |
| C  | 1.64344  | -3.02367 | -5.72171 |
| Y  | 0.43878  | -1.89474 | -0.29911 |
| C  | -1.36115 | -1.73595 | -2.27978 |
| O  | -2.24294 | -1.61990 | -2.98386 |
| N  | 1.27749  | -3.92048 | -1.26607 |
| C  | 0.91409  | -5.26925 | -0.97809 |
| C  | 0.06878  | -5.99254 | -1.86950 |
| C  | -0.40800 | -7.25014 | -1.49081 |
| C  | -0.08660 | -7.81837 | -0.26530 |
| C  | 0.73772  | -7.11511 | 0.60060  |
| C  | 1.24493  | -5.85346 | 0.27205  |
| C  | -0.32638 | -5.47775 | -3.24757 |
| C  | 0.14472  | -6.42066 | -4.36715 |
| C  | 2.12011  | -5.15501 | 1.29856  |
| C  | 3.34680  | -5.98906 | 1.69376  |
| Al | 1.07550  | -0.54165 | 2.52114  |
| C  | 1.64535  | -0.93925 | 4.38154  |
| C  | 2.57699  | -1.40290 | 1.40072  |
| Al | -2.40996 | -1.82225 | 1.15489  |
| C  | -2.05106 | -3.43762 | -0.06820 |
| C  | -0.65136 | -1.22087 | 1.83531  |
| Y  | -1.18792 | 0.95713  | 1.14456  |
| C  | -3.24186 | -0.24378 | 0.06669  |
| N  | -1.67283 | 3.28193  | 0.51838  |
| C  | -1.28633 | 4.12500  | -0.56022 |
| C  | -2.06378 | 4.10029  | -1.75359 |



|   |          |         |          |
|---|----------|---------|----------|
| C | -1.68630 | 4.89137 | -2.84176 |
| C | -0.54829 | 5.68556 | -2.80493 |
| C | 0.24155  | 5.66398 | -1.66459 |
| C | -0.09161 | 4.89409 | -0.54489 |
| C | -3.31164 | 3.24252 | -1.90066 |
| C | -4.58173 | 4.09391 | -2.03283 |
| C | 0.89178  | 4.89115 | 0.61531  |
| C | 2.23025  | 4.27407 | 0.17809  |
| N | -2.67549 | 2.39070 | 2.32085  |
| C | -3.75310 | 2.11276 | 3.20569  |
| C | -5.11851 | 2.16330 | 2.79545  |
| C | -6.11963 | 1.80090 | 3.70222  |
| C | -5.83214 | 1.36955 | 4.98857  |
| C | -4.50385 | 1.29753 | 5.38067  |
| C | -3.46054 | 1.65809 | 4.52364  |
| C | -5.58491 | 2.60081 | 1.41407  |
| C | -6.44243 | 1.52806 | 0.72166  |
| C | -2.04734 | 1.55239 | 5.07294  |
| C | -1.83434 | 2.46294 | 6.29180  |
| C | 0.12928  | 0.53944 | -1.01785 |
| C | 1.09798  | 1.53414 | 2.32670  |
| C | -2.45613 | 3.52400 | 1.59365  |
| N | -2.95082 | 4.76162 | 1.97745  |
| C | -3.26430 | 5.04622 | 3.37981  |
| C | -2.15360 | 5.68144 | 4.19525  |
| C | -2.48079 | 6.63181 | 5.16971  |
| C | -1.50127 | 7.17248 | 6.00029  |
| C | -0.17145 | 6.77660 | 5.86293  |
| C | 0.16661  | 5.83477 | 4.89271  |
| C | -0.81788 | 5.29024 | 4.06878  |
| C | -2.72656 | 5.96564 | 1.14929  |
| C | -3.65827 | 7.12714 | 1.42995  |
| C | -4.95195 | 7.16749 | 0.89661  |
| C | -5.78139 | 8.26625 | 1.11008  |

|   |          |          |          |
|---|----------|----------|----------|
| C | -5.32449 | 9.35376  | 1.85349  |
| C | -4.03222 | 9.33578  | 2.37447  |
| C | -3.20755 | 8.23225  | 2.16143  |
| C | 1.15277  | 6.28563  | 1.20288  |
| C | -6.38309 | 3.90990  | 1.49063  |
| C | -3.79030 | -2.42702 | 2.43552  |
| C | -3.20425 | 2.27698  | -3.09014 |
| C | -1.70148 | 0.09921  | 5.42597  |
| C | -1.84364 | -5.27249 | -3.37712 |
| C | 1.31142  | -4.77948 | 2.54945  |
| C | 4.18870  | 0.96619  | -0.45095 |
| C | -0.08442 | -1.23064 | -5.39764 |
| H | -0.54605 | 4.54843  | 3.32409  |
| H | 2.73835  | 4.91962  | -0.54690 |
| H | 1.15104  | 6.25896  | -1.63947 |
| H | 0.73046  | 0.19464  | -1.87508 |
| H | -0.71153 | 1.05374  | -1.51421 |
| H | 0.76482  | 1.35079  | -0.62123 |
| H | -0.65297 | -2.03181 | 2.59484  |
| H | -3.76209 | 0.52943  | 0.65094  |
| H | -2.82294 | 0.24198  | -0.82769 |
| H | -4.06016 | -0.85610 | -0.33562 |
| H | -2.14112 | -4.22226 | 0.69770  |
| H | -2.94114 | -3.53659 | -0.70463 |
| H | -1.22310 | -3.79813 | -0.69673 |
| H | -4.15100 | -1.60474 | 3.06582  |
| H | -3.40517 | -3.20145 | 3.11251  |
| H | -4.66788 | -2.85631 | 1.93288  |
| H | 3.39717  | -0.72784 | 1.67913  |
| H | 2.78638  | -1.58709 | 0.33564  |
| H | 2.78293  | -2.34346 | 1.92833  |
| H | 0.46249  | 2.10144  | 3.02685  |
| H | 2.10160  | 1.62561  | 2.76462  |
| H | 1.18110  | 2.11972  | 1.40139  |

|   |          |          |          |
|---|----------|----------|----------|
| H | 2.72466  | -1.14005 | 4.42998  |
| H | 1.14058  | -1.81869 | 4.80116  |
| H | 1.45161  | -0.10793 | 5.07031  |
| H | -2.83608 | 5.68293  | 0.10439  |
| H | -1.69759 | 6.31693  | 1.27592  |
| H | -2.20080 | 8.22606  | 2.56986  |
| H | -3.66142 | 10.18323 | 2.94463  |
| H | -5.96838 | 10.21371 | 2.01629  |
| H | -6.78157 | 8.27717  | 0.68549  |
| H | -5.31125 | 6.33478  | 0.30067  |
| H | -3.57176 | 4.12243  | 3.86783  |
| H | -4.13715 | 5.70570  | 3.40113  |
| H | 1.19954  | 5.51708  | 4.77880  |
| H | 0.59522  | 7.19894  | 6.50652  |
| H | -1.77674 | 7.90833  | 6.75111  |
| H | -3.51468 | 6.95304  | 5.27436  |
| H | -0.27217 | 6.29870  | -3.65821 |
| H | -2.30000 | 4.88064  | -3.73922 |
| H | 0.46924  | 4.26249  | 1.40551  |
| H | 0.24718  | 6.74835  | 1.60272  |
| H | 1.56950  | 6.96320  | 0.45003  |
| H | 1.87629  | 6.22157  | 2.02270  |
| H | 2.89917  | 4.14541  | 1.03604  |
| H | 2.09346  | 3.30075  | -0.30067 |
| H | -3.40505 | 2.64143  | -0.99130 |
| H | -4.71539 | 4.74967  | -1.16834 |
| H | -5.46936 | 3.45663  | -2.11246 |
| H | -4.54473 | 4.72702  | -2.92635 |
| H | -2.29295 | 1.67358  | -3.03877 |
| H | -3.18411 | 2.81442  | -4.04459 |
| H | -4.06413 | 1.59844  | -3.11218 |
| H | -7.15693 | 1.85087  | 3.38143  |
| H | -6.62957 | 1.08918  | 5.67106  |
| H | -4.26253 | 0.95599  | 6.38379  |

|   |          |          |          |
|---|----------|----------|----------|
| H | -4.70310 | 2.77732  | 0.79067  |
| H | -5.80183 | 4.71057  | 1.95181  |
| H | -7.29490 | 3.77529  | 2.08296  |
| H | -6.68824 | 4.23658  | 0.48993  |
| H | -6.66296 | 1.82612  | -0.30955 |
| H | -7.40179 | 1.39522  | 1.23300  |
| H | -5.94569 | 0.55577  | 0.69714  |
| H | -1.36172 | 1.89012  | 4.28872  |
| H | -2.06658 | 3.50714  | 6.06634  |
| H | -0.79141 | 2.41400  | 6.62406  |
| H | -2.46211 | 2.15207  | 7.13444  |
| H | -1.76858 | -0.55151 | 4.54934  |
| H | -2.38220 | -0.29126 | 6.19064  |
| H | -0.68428 | 0.02957  | 5.82175  |
| H | 2.35926  | -5.98435 | -2.54727 |
| H | 3.75979  | -5.88685 | -1.50081 |
| H | 5.50204  | -7.21483 | -2.10498 |
| H | 6.80855  | -8.47178 | -3.78455 |
| H | 6.28471  | -8.23518 | -6.20431 |
| H | 4.42695  | -6.74327 | -6.91681 |
| H | 3.10695  | -5.51696 | -5.23325 |
| H | 4.50031  | -2.44587 | -2.95223 |
| H | 4.93425  | -3.86324 | -3.87105 |
| H | 7.18046  | -4.19891 | -3.42180 |
| H | 9.04448  | -4.59285 | -1.84555 |
| H | 8.64313  | -4.49931 | 0.60765  |
| H | 6.36221  | -3.99759 | 1.45903  |
| H | 4.51166  | -3.57566 | -0.11880 |
| H | 0.99482  | -7.55138 | 1.56247  |
| H | -0.47326 | -8.79565 | 0.00958  |
| H | -1.05043 | -7.79639 | -2.17666 |
| H | 2.48797  | -4.23092 | 0.84072  |
| H | 3.96236  | -6.24432 | 0.82640  |
| H | 3.05649  | -6.92418 | 2.18438  |

|   |          |          |          |
|---|----------|----------|----------|
| H | 3.97375  | -5.43195 | 2.39851  |
| H | 1.92894  | -4.23082 | 3.26853  |
| H | 0.93023  | -5.67552 | 3.05147  |
| H | 0.44682  | -4.15427 | 2.30290  |
| H | 0.16190  | -4.50874 | -3.39063 |
| H | 1.21996  | -6.61239 | -4.33207 |
| H | -0.09014 | -5.99514 | -5.34902 |
| H | -0.36128 | -7.39010 | -4.30397 |
| H | -2.23778 | -4.62082 | -2.59543 |
| H | -2.37526 | -6.22751 | -3.30227 |
| H | -2.08989 | -4.83562 | -4.35155 |
| H | 2.18153  | -0.03053 | -6.15944 |
| H | 3.94299  | 1.59270  | -5.54942 |
| H | 4.97611  | 1.46314  | -3.30562 |
| H | 0.70428  | -2.51009 | -3.86554 |
| H | 2.46928  | -3.57478 | -5.26752 |
| H | 2.02323  | -2.53873 | -6.62813 |
| H | 0.86908  | -3.73812 | -6.02241 |
| H | -0.43965 | -0.40380 | -4.77635 |
| H | -0.92231 | -1.91250 | -5.57863 |
| H | 0.19914  | -0.81004 | -6.36789 |
| H | 4.27807  | -1.14939 | -0.80002 |
| H | 6.39813  | -1.09723 | -2.17361 |
| H | 6.58164  | -0.42620 | -0.55092 |
| H | 6.47245  | 0.65482  | -1.94186 |
| H | 3.12046  | 0.97891  | -0.22111 |
| H | 4.43377  | 1.90605  | -0.95783 |
| H | 4.74005  | 0.94527  | 0.49595  |

216

TS6 without dispersion

|   |         |          |          |
|---|---------|----------|----------|
| C | 5.06594 | -7.48165 | -3.04996 |
| C | 4.13778 | -6.52106 | -3.46430 |
| C | 3.84751 | -6.42046 | -4.82935 |
| C | 4.46888 | -7.25597 | -5.75503 |

|   |          |          |          |
|---|----------|----------|----------|
| C | 5.38664  | -8.21552 | -5.32898 |
| C | 5.68162  | -8.32710 | -3.97169 |
| C | 3.42185  | -5.68838 | -2.42076 |
| N | 3.34521  | -4.25089 | -2.71682 |
| C | 4.63403  | -3.67940 | -3.12582 |
| C | 5.75331  | -3.85785 | -2.11762 |
| C | 5.62467  | -3.41387 | -0.79635 |
| C | 6.68601  | -3.52787 | 0.09888  |
| C | 7.89546  | -4.08784 | -0.31353 |
| C | 8.03365  | -4.53564 | -1.62544 |
| C | 6.96758  | -4.42420 | -2.51756 |
| C | 2.34152  | -3.43588 | -2.22312 |
| N | 2.32126  | -2.09553 | -2.43418 |
| C | 2.71324  | -1.36339 | -3.58912 |
| C | 3.63884  | -0.28556 | -3.46306 |
| C | 3.82066  | 0.59699  | -4.53256 |
| C | 3.15286  | 0.43519  | -5.73769 |
| C | 2.31884  | -0.66355 | -5.89036 |
| C | 2.09150  | -1.57402 | -4.85415 |
| C | 4.52229  | -0.08632 | -2.23838 |
| C | 6.01180  | -0.21975 | -2.60018 |
| C | 1.20095  | -2.76769 | -5.16909 |
| C | 1.78637  | -3.57851 | -6.33689 |
| Y | 0.42510  | -1.68958 | -0.96677 |
| C | -0.36476 | -0.14241 | -2.61259 |
| O | -0.88539 | 0.43434  | -3.49618 |
| N | 1.30549  | -3.83930 | -1.44349 |
| C | 0.96916  | -5.12435 | -0.92296 |
| C | 0.02256  | -5.93882 | -1.61112 |
| C | -0.36019 | -7.15986 | -1.04754 |
| C | 0.13603  | -7.59120 | 0.17535  |
| C | 1.03335  | -6.78221 | 0.85717  |
| C | 1.46037  | -5.55666 | 0.33626  |
| C | -0.56391 | -5.57013 | -2.96753 |

|    |          |          |          |
|----|----------|----------|----------|
| C  | 0.09570  | -6.37146 | -4.10035 |
| C  | 2.41280  | -4.72273 | 1.17544  |
| C  | 3.67339  | -5.48970 | 1.59757  |
| Al | 0.96206  | -0.30821 | 1.96559  |
| C  | 1.44005  | -0.83902 | 3.82035  |
| C  | 2.56418  | -0.81130 | 0.80247  |
| Al | -2.42955 | -1.38424 | 0.21364  |
| C  | -1.98795 | -2.67463 | -1.34325 |
| C  | -0.73730 | -0.92176 | 1.13687  |
| Y  | -1.30082 | 1.35710  | 0.79869  |
| C  | -3.15343 | 0.35770  | -0.68417 |
| N  | -1.79195 | 3.71248  | 0.37082  |
| C  | -1.37380 | 4.67668  | -0.59304 |
| C  | -2.11978 | 4.79750  | -1.80004 |
| C  | -1.69987 | 5.69889  | -2.78196 |
| C  | -0.55329 | 6.46536  | -2.62662 |
| C  | 0.20127  | 6.30860  | -1.47326 |
| C  | -0.17426 | 5.42533  | -0.45536 |
| C  | -3.37658 | 3.98673  | -2.07761 |
| C  | -4.62559 | 4.87628  | -2.14917 |
| C  | 0.77105  | 5.28782  | 0.72780  |
| C  | 2.10665  | 4.67299  | 0.27577  |
| N  | -2.79220 | 2.61294  | 2.05915  |
| C  | -3.89245 | 2.21623  | 2.87450  |
| C  | -5.24061 | 2.26677  | 2.41530  |
| C  | -6.26227 | 1.78471  | 3.23940  |
| C  | -6.00781 | 1.23465  | 4.48694  |
| C  | -4.69437 | 1.16860  | 4.92647  |
| C  | -3.63297 | 1.64884  | 4.15411  |
| C  | -5.66585 | 2.82266  | 1.06480  |
| C  | -6.44263 | 1.78829  | 0.23298  |
| C  | -2.23994 | 1.54385  | 4.75169  |
| C  | -2.12175 | 2.30727  | 6.07953  |
| C  | 0.41929  | 1.19257  | -1.41683 |

|   |          |          |          |
|---|----------|----------|----------|
| C | 0.88849  | 1.79833  | 2.08860  |
| C | -2.58372 | 3.82827  | 1.45770  |
| N | -3.09925 | 5.00425  | 1.97039  |
| C | -3.45137 | 5.12474  | 3.38822  |
| C | -2.37013 | 5.68776  | 4.29134  |
| C | -2.73041 | 6.54911  | 5.33411  |
| C | -1.77800 | 7.01737  | 6.23731  |
| C | -0.44313 | 6.63752  | 6.10560  |
| C | -0.07211 | 5.78386  | 5.06797  |
| C | -1.02940 | 5.31113  | 4.17121  |
| C | -2.87137 | 6.29799  | 1.29120  |
| C | -3.82892 | 7.40588  | 1.67876  |
| C | -5.12891 | 7.46035  | 1.16202  |
| C | -5.98216 | 8.51456  | 1.47996  |
| C | -5.54345 | 9.54319  | 2.31300  |
| C | -4.24594 | 9.51125  | 2.81972  |
| C | -3.39749 | 8.45124  | 2.50323  |
| C | 1.04353  | 6.61513  | 1.45003  |
| C | -6.52087 | 4.08630  | 1.23353  |
| C | -3.86253 | -2.24869 | 1.26250  |
| C | -3.24903 | 3.15749  | -3.36376 |
| C | -1.83460 | 0.07610  | 4.94431  |
| C | -2.08521 | -5.77225 | -3.04034 |
| C | 1.69282  | -4.17790 | 2.41678  |
| C | 4.29311  | 1.26297  | -1.54492 |
| C | -0.24656 | -2.37125 | -5.49217 |
| H | -0.73187 | 4.63637  | 3.37423  |
| H | 2.64367  | 5.35853  | -0.38887 |
| H | 1.11592  | 6.88422  | -1.35644 |
| H | 1.16089  | 1.49990  | -2.15956 |
| H | -0.31771 | 2.01409  | -1.43179 |
| H | 0.97580  | 1.15569  | -0.46564 |
| H | -0.85071 | -1.75576 | 1.86147  |
| H | -3.72446 | 1.09533  | -0.10019 |



|   |          |          |          |
|---|----------|----------|----------|
| H | -2.62820 | 0.89747  | -1.48709 |
| H | -3.93466 | -0.18757 | -1.23031 |
| H | -1.65541 | -3.65643 | -0.97451 |
| H | -3.04051 | -2.82731 | -1.61852 |
| H | -1.51789 | -2.50425 | -2.32537 |
| H | -4.20305 | -1.61193 | 2.08850  |
| H | -3.52245 | -3.19250 | 1.70943  |
| H | -4.74693 | -2.48805 | 0.65680  |
| H | 3.28938  | -0.03272 | 1.08030  |
| H | 2.70327  | -0.88386 | -0.28653 |
| H | 2.96392  | -1.74591 | 1.21756  |
| H | 0.28934  | 2.18339  | 2.92908  |
| H | 1.91816  | 1.81681  | 2.46991  |
| H | 0.91033  | 2.57978  | 1.31510  |
| H | 2.49553  | -1.13725 | 3.88381  |
| H | 0.84921  | -1.67945 | 4.20306  |
| H | 1.30892  | -0.01264 | 4.53023  |
| H | -2.94724 | 6.13494  | 0.21821  |
| H | -1.85120 | 6.64305  | 1.48823  |
| H | -2.38719 | 8.43291  | 2.90263  |
| H | -3.88991 | 10.31342 | 3.46036  |
| H | -6.20611 | 10.36896 | 2.55699  |
| H | -6.98690 | 8.53804  | 1.06689  |
| H | -5.47488 | 6.67462  | 0.49839  |
| H | -3.75052 | 4.14687  | 3.76230  |
| H | -4.33744 | 5.76243  | 3.45897  |
| H | 0.96510  | 5.47902  | 4.95815  |
| H | 0.30234  | 7.00399  | 6.80579  |
| H | -2.07870 | 7.68476  | 7.04051  |
| H | -3.76812 | 6.85870  | 5.43509  |
| H | -0.24401 | 7.16287  | -3.39991 |
| H | -2.28674 | 5.79560  | -3.69173 |
| H | 0.30585  | 4.60593  | 1.44653  |
| H | 0.13095  | 7.07043  | 1.84328  |

|   |          |          |          |
|---|----------|----------|----------|
| H | 1.51852  | 7.34291  | 0.78376  |
| H | 1.72100  | 6.45409  | 2.29533  |
| H | 2.75310  | 4.46855  | 1.13646  |
| H | 1.95953  | 3.73893  | -0.27475 |
| H | -3.50804 | 3.29050  | -1.24443 |
| H | -4.76973 | 5.44673  | -1.22746 |
| H | -5.52250 | 4.26924  | -2.31482 |
| H | -4.55478 | 5.59449  | -2.97359 |
| H | -2.35779 | 2.52459  | -3.35966 |
| H | -3.19125 | 3.79982  | -4.24957 |
| H | -4.12424 | 2.50988  | -3.48656 |
| H | -7.28756 | 1.83354  | 2.88224  |
| H | -6.81986 | 0.86062  | 5.10408  |
| H | -4.47958 | 0.73799  | 5.90080  |
| H | -4.76717 | 3.09741  | 0.50421  |
| H | -5.99708 | 4.85141  | 1.81021  |
| H | -7.45605 | 3.85733  | 1.75631  |
| H | -6.78546 | 4.50801  | 0.25735  |
| H | -6.61839 | 2.16801  | -0.77964 |
| H | -7.42180 | 1.57840  | 0.67643  |
| H | -5.90845 | 0.83859  | 0.15513  |
| H | -1.54290 | 2.00743  | 4.04603  |
| H | -2.40251 | 3.35836  | 5.97218  |
| H | -1.09002 | 2.27068  | 6.44600  |
| H | -2.75982 | 1.86449  | 6.85232  |
| H | -1.83128 | -0.46945 | 3.99569  |
| H | -2.52786 | -0.43465 | 5.62187  |
| H | -0.83334 | 0.00458  | 5.37801  |
| H | 2.41091  | -6.07491 | -2.31102 |
| H | 3.92297  | -5.84131 | -1.45723 |
| H | 5.31161  | -7.56546 | -1.99411 |
| H | 6.39827  | -9.06805 | -3.62788 |
| H | 5.86951  | -8.86919 | -6.05008 |
| H | 4.23232  | -7.15844 | -6.81122 |

|   |          |          |          |
|---|----------|----------|----------|
| H | 3.13519  | -5.67577 | -5.16888 |
| H | 4.49186  | -2.62243 | -3.33773 |
| H | 4.93198  | -4.14682 | -4.06883 |
| H | 7.07665  | -4.78505 | -3.53744 |
| H | 8.96987  | -4.97747 | -1.95592 |
| H | 8.72349  | -4.17447 | 0.38465  |
| H | 6.57044  | -3.17338 | 1.11960  |
| H | 4.69008  | -2.96649 | -0.46882 |
| H | 1.41367  | -7.10514 | 1.82274  |
| H | -0.17919 | -8.54278 | 0.59430  |
| H | -1.06759 | -7.78659 | -1.58330 |
| H | 2.73214  | -3.87131 | 0.56564  |
| H | 4.22521  | -5.87981 | 0.73798  |
| H | 3.43158  | -6.33424 | 2.25163  |
| H | 4.34811  | -4.83069 | 2.15392  |
| H | 2.35585  | -3.54083 | 3.00978  |
| H | 1.35142  | -4.99748 | 3.05895  |
| H | 0.81206  | -3.58648 | 2.14701  |
| H | -0.35599 | -4.50884 | -3.13491 |
| H | 1.17267  | -6.20257 | -4.15821 |
| H | -0.33938 | -6.09711 | -5.06797 |
| H | -0.06191 | -7.44656 | -3.95741 |
| H | -2.60496 | -5.29879 | -2.20474 |
| H | -2.35176 | -6.83489 | -3.04445 |
| H | -2.47393 | -5.34122 | -3.96937 |
| H | 1.81757  | -0.81971 | -6.84224 |
| H | 3.29850  | 1.13833  | -6.55291 |
| H | 4.51744  | 1.42355  | -4.41684 |
| H | 1.17746  | -3.42132 | -4.29351 |
| H | 2.84290  | -3.81051 | -6.17467 |
| H | 1.71849  | -3.02270 | -7.27834 |
| H | 1.23746  | -4.51683 | -6.47262 |
| H | -0.71017 | -1.81000 | -4.67898 |
| H | -0.85109 | -3.26443 | -5.68800 |

|   |          |          |          |
|---|----------|----------|----------|
| H | -0.29183 | -1.74012 | -6.38665 |
| H | 4.28211  | -0.88131 | -1.52655 |
| H | 6.23339  | -1.16634 | -3.09996 |
| H | 6.62788  | -0.17082 | -1.69590 |
| H | 6.33195  | 0.58953  | -3.26572 |
| H | 3.25823  | 1.38632  | -1.21902 |
| H | 4.53180  | 2.09723  | -2.21406 |
| H | 4.93718  | 1.35390  | -0.66309 |

216

Int9 without dispersion

|   |         |          |          |
|---|---------|----------|----------|
| C | 2.94243 | -7.86703 | -3.48261 |
| C | 2.61524 | -6.56651 | -3.08247 |
| C | 1.52070 | -5.93923 | -3.68453 |
| C | 0.76960 | -6.59555 | -4.65873 |
| C | 1.09936 | -7.89424 | -5.04329 |
| C | 2.18935 | -8.52940 | -4.45018 |
| C | 3.39985 | -5.91741 | -1.95801 |
| N | 3.69188 | -4.49176 | -2.12802 |
| C | 4.53017 | -4.19520 | -3.30534 |
| C | 5.68010 | -5.15673 | -3.52296 |
| C | 6.77960 | -5.19018 | -2.65677 |
| C | 7.85697 | -6.03826 | -2.90132 |
| C | 7.85812 | -6.86240 | -4.02670 |
| C | 6.77517 | -6.83090 | -4.90237 |
| C | 5.69507 | -5.98592 | -4.64911 |
| C | 2.91267 | -3.51453 | -1.53042 |
| N | 2.78470 | -2.23899 | -1.94875 |
| C | 3.40206 | -1.52912 | -3.01268 |
| C | 4.57340 | -0.76245 | -2.74875 |
| C | 5.16120 | -0.02327 | -3.77875 |
| C | 4.61572 | 0.01274  | -5.05520 |
| C | 3.44092 | -0.68514 | -5.29619 |
| C | 2.81415 | -1.44578 | -4.30316 |
| C | 5.22281 | -0.70324 | -1.37472 |

|    |          |          |          |
|----|----------|----------|----------|
| C  | 6.63762  | -1.29896 | -1.37152 |
| C  | 1.49117  | -2.10498 | -4.65749 |
| C  | 1.59388  | -3.05852 | -5.85577 |
| Y  | 0.98988  | -1.69811 | -0.36267 |
| C  | 0.49578  | 1.71344  | -1.13497 |
| O  | 0.70804  | 0.46406  | -1.07876 |
| N  | 2.12924  | -3.76036 | -0.43682 |
| C  | 2.26992  | -4.76740 | 0.55990  |
| C  | 1.20134  | -5.68479 | 0.76914  |
| C  | 1.25364  | -6.57626 | 1.84354  |
| C  | 2.34028  | -6.61426 | 2.70605  |
| C  | 3.39658  | -5.74201 | 2.48565  |
| C  | 3.38722  | -4.81321 | 1.43990  |
| C  | -0.00572 | -5.74709 | -0.15035 |
| C  | -0.26457 | -7.16043 | -0.69139 |
| C  | 4.60115  | -3.90760 | 1.30924  |
| C  | 5.85039  | -4.71533 | 0.92921  |
| Al | 0.72986  | -0.38530 | 2.36091  |
| C  | 1.01038  | -1.09886 | 4.18628  |
| C  | 2.54811  | -0.58130 | 1.33392  |
| Al | -2.05027 | -1.48151 | -0.20435 |
| C  | -1.05400 | -2.34027 | -1.83262 |
| C  | -0.73468 | -1.08348 | 1.22417  |
| Y  | -1.18589 | 1.32451  | 0.63438  |
| C  | -2.67563 | 0.28257  | -1.15575 |
| N  | -1.80594 | 3.67831  | 0.55461  |
| C  | -1.28328 | 4.76452  | -0.19143 |
| C  | -1.79361 | 5.00164  | -1.50140 |
| C  | -1.24810 | 6.02257  | -2.28408 |
| C  | -0.19441 | 6.80559  | -1.83107 |
| C  | 0.33567  | 6.54340  | -0.57585 |
| C  | -0.17401 | 5.53608  | 0.25108  |
| C  | -2.92756 | 4.18130  | -2.09834 |
| C  | -4.17836 | 5.03313  | -2.35505 |

|   |          |          |          |
|---|----------|----------|----------|
| C | 0.53183  | 5.30297  | 1.57844  |
| C | 1.98477  | 4.85138  | 1.35560  |
| N | -3.04507 | 2.27663  | 1.78381  |
| C | -4.24262 | 1.72737  | 2.31525  |
| C | -5.50459 | 1.87503  | 1.66694  |
| C | -6.64766 | 1.32225  | 2.25235  |
| C | -6.59500 | 0.60443  | 3.43756  |
| C | -5.35795 | 0.39831  | 4.03041  |
| C | -4.18014 | 0.92113  | 3.48868  |
| C | -5.70086 | 2.58033  | 0.33346  |
| C | -6.20993 | 1.60616  | -0.74249 |
| C | -2.88125 | 0.59437  | 4.20819  |
| C | -2.72888 | 1.39153  | 5.51116  |
| C | 1.32121  | 2.48325  | -2.11315 |
| C | 0.64374  | 1.69190  | 2.46267  |
| C | -2.81443 | 3.57843  | 1.44377  |
| N | -3.51166 | 4.64222  | 1.99783  |
| C | -4.16275 | 4.53568  | 3.30436  |
| C | -3.38191 | 5.08385  | 4.48364  |
| C | -4.08187 | 5.64246  | 5.55971  |
| C | -3.41134 | 6.08485  | 6.69733  |
| C | -2.02221 | 5.98563  | 6.77417  |
| C | -1.31473 | 5.43657  | 5.70676  |
| C | -1.99103 | 4.98637  | 4.57246  |
| C | -3.24629 | 6.02629  | 1.55502  |
| C | -4.33436 | 7.02998  | 1.87848  |
| C | -5.49060 | 7.12795  | 1.09535  |
| C | -6.45908 | 8.09256  | 1.36422  |
| C | -6.28060 | 8.98809  | 2.41797  |
| C | -5.12583 | 8.91446  | 3.19416  |
| C | -4.16200 | 7.94417  | 2.92419  |
| C | 0.53227  | 6.54137  | 2.48714  |
| C | -6.66989 | 3.76414  | 0.44939  |
| C | -3.70217 | -2.45829 | 0.26874  |

|   |          |          |          |
|---|----------|----------|----------|
| C | -2.50575 | 3.47285  | -3.39366 |
| C | -2.75823 | -0.91033 | 4.49002  |
| C | -1.25905 | -5.20750 | 0.54902  |
| C | 4.87302  | -3.11164 | 2.59590  |
| C | 5.26440  | 0.73567  | -0.83808 |
| C | 0.42061  | -1.03727 | -4.93937 |
| H | -1.43291 | 4.55131  | 3.74884  |
| H | 2.57899  | 5.65194  | 0.90111  |
| H | 1.17586  | 7.13623  | -0.22243 |
| H | 1.93878  | 1.84879  | -2.75865 |
| H | 0.67101  | 3.14005  | -2.70110 |
| H | 1.95967  | 3.16858  | -1.54013 |
| H | -1.25147 | -1.63712 | 2.02950  |
| H | -3.37905 | 0.97195  | -0.66187 |
| H | -2.01094 | 0.88216  | -1.80047 |
| H | -3.31184 | -0.25256 | -1.87214 |
| H | -0.53585 | -3.31135 | -1.77240 |
| H | -1.98648 | -2.59104 | -2.35554 |
| H | -0.51753 | -1.71048 | -2.55786 |
| H | -4.39155 | -1.79004 | 0.80149  |
| H | -3.52939 | -3.31976 | 0.92316  |
| H | -4.24203 | -2.82955 | -0.61322 |
| H | 3.11445  | -0.13588 | 2.16134  |
| H | 2.79285  | 0.05996  | 0.47437  |
| H | 3.05455  | -1.54708 | 1.18229  |
| H | -0.20523 | 2.17551  | 2.97382  |
| H | 1.46355  | 1.77882  | 3.18791  |
| H | 0.96359  | 2.35396  | 1.64265  |
| H | 2.06212  | -1.00406 | 4.49019  |
| H | 0.75508  | -2.16311 | 4.26238  |
| H | 0.42156  | -0.57244 | 4.94754  |
| H | -3.09891 | 6.01358  | 0.47670  |
| H | -2.31090 | 6.38566  | 1.99671  |
| H | -3.26442 | 7.89295  | 3.53411  |

|   |          |          |          |
|---|----------|----------|----------|
| H | -4.97105 | 9.61441  | 4.01073  |
| H | -7.03248 | 9.74453  | 2.62567  |
| H | -7.34844 | 8.15143  | 0.74264  |
| H | -5.63147 | 6.44769  | 0.26170  |
| H | -4.39443 | 3.48932  | 3.49748  |
| H | -5.12483 | 5.05546  | 3.24966  |
| H | -0.23252 | 5.35267  | 5.75643  |
| H | -1.49596 | 6.33429  | 7.65839  |
| H | -3.97380 | 6.51419  | 7.52219  |
| H | -5.16405 | 5.73496  | 5.50085  |
| H | 0.21366  | 7.59944  | -2.45048 |
| H | -1.66047 | 6.20507  | -3.27364 |
| H | 0.00447  | 4.49460  | 2.09482  |
| H | -0.47701 | 6.88081  | 2.73270  |
| H | 1.05784  | 7.37895  | 2.01610  |
| H | 1.04555  | 6.32171  | 3.42970  |
| H | 2.45831  | 4.58382  | 2.30655  |
| H | 2.04289  | 3.98392  | 0.69261  |
| H | -3.18813 | 3.40717  | -1.37128 |
| H | -4.52369 | 5.52624  | -1.44248 |
| H | -4.99765 | 4.41327  | -2.73570 |
| H | -3.98197 | 5.81539  | -3.09680 |
| H | -1.62891 | 2.83838  | -3.23677 |
| H | -2.25916 | 4.19081  | -4.18386 |
| H | -3.31774 | 2.83794  | -3.76485 |
| H | -7.60515 | 1.45282  | 1.75446  |
| H | -7.49851 | 0.19353  | 3.87933  |
| H | -5.29849 | -0.18917 | 4.94215  |
| H | -4.73378 | 2.96923  | 0.00274  |
| H | -6.34695 | 4.47468  | 1.21283  |
| H | -7.67724 | 3.42540  | 0.71507  |
| H | -6.74778 | 4.29466  | -0.50633 |
| H | -6.25251 | 2.10071  | -1.71979 |
| H | -7.22051 | 1.25489  | -0.50732 |



|   |          |          |          |
|---|----------|----------|----------|
| H | -5.57043 | 0.72482  | -0.83166 |
| H | -2.05495 | 0.87660  | 3.54777  |
| H | -2.74670 | 2.46979  | 5.33496  |
| H | -1.78183 | 1.14519  | 6.00494  |
| H | -3.53987 | 1.15241  | 6.20892  |
| H | -2.94267 | -1.50163 | 3.58893  |
| H | -3.47080 | -1.23635 | 5.25558  |
| H | -1.75677 | -1.14938 | 4.85763  |
| H | 2.86106  | -6.05783 | -1.02276 |
| H | 4.35126  | -6.44620 | -1.84439 |
| H | 3.79935  | -8.36307 | -3.03266 |
| H | 2.45925  | -9.53982 | -4.74547 |
| H | 0.51240  | -8.40623 | -5.80073 |
| H | -0.07774 | -6.09145 | -5.11545 |
| H | 1.25117  | -4.93020 | -3.38603 |
| H | 4.93600  | -3.19237 | -3.19169 |
| H | 3.91301  | -4.18595 | -4.21132 |
| H | 4.85015  | -5.97118 | -5.33242 |
| H | 6.76751  | -7.46535 | -5.78448 |
| H | 8.70055  | -7.52041 | -4.22129 |
| H | 8.70081  | -6.04887 | -2.21673 |
| H | 6.79217  | -4.54645 | -1.78321 |
| H | 4.25450  | -5.77055 | 3.15253  |
| H | 2.36624  | -7.31632 | 3.53477  |
| H | 0.42452  | -7.26150 | 1.99900  |
| H | 4.40799  | -3.19221 | 0.50334  |
| H | 5.68761  | -5.30006 | 0.02105  |
| H | 6.12157  | -5.41389 | 1.72863  |
| H | 6.70771  | -4.05190 | 0.76662  |
| H | 5.66755  | -2.37549 | 2.42961  |
| H | 5.20398  | -3.77009 | 3.40616  |
| H | 3.98288  | -2.58357 | 2.94633  |
| H | 0.21403  | -5.10497 | -1.00957 |
| H | 0.61641  | -7.57291 | -1.19074 |

|   |          |          |          |
|---|----------|----------|----------|
| H | -1.08275 | -7.14008 | -1.41936 |
| H | -0.55598 | -7.85208 | 0.10661  |
| H | -1.10760 | -4.19135 | 0.92782  |
| H | -1.52667 | -5.83679 | 1.40573  |
| H | -2.11410 | -5.19157 | -0.13488 |
| H | 2.98945  | -0.63759 | -6.28406 |
| H | 5.09023  | 0.58833  | -5.84505 |
| H | 6.06753  | 0.54015  | -3.57067 |
| H | 1.16757  | -2.68745 | -3.78846 |
| H | 2.30963  | -3.86588 | -5.68030 |
| H | 1.90352  | -2.52873 | -6.76294 |
| H | 0.62058  | -3.51702 | -6.06214 |
| H | 0.33347  | -0.32612 | -4.11229 |
| H | -0.55927 | -1.49983 | -5.10207 |
| H | 0.67063  | -0.46267 | -5.83815 |
| H | 4.60358  | -1.29520 | -0.69496 |
| H | 6.64547  | -2.33143 | -1.73043 |
| H | 7.05800  | -1.28853 | -0.35966 |
| H | 7.31293  | -0.72444 | -2.01538 |
| H | 4.27495  | 1.20137  | -0.85966 |
| H | 5.93624  | 1.36401  | -1.43353 |
| H | 5.62635  | 0.75097  | 0.19576  |

## References

- [1] *SAINTPlus Data Reduction and Correction Program* v. 6.02a, Bruker AXS, Madison, WI, 2000.
- [2] G. M. Sheldrick, *SADABS*, A Program for Empirical Absorption Correction, University of Göttingen, Göttingen, Germany, 1998.
- [3] G. M. Sheldrick, *SHELXL-97*, Program for the Refinement of Crystal Structures, University of Göttingen, Göttingen, Germany, 1997.
- [4] Gaussian 09, Revision D.01, M. J. Frisch, G. W. Trucks, H. B. Schlegel, G. E. Scuseria, M. A. Robb, J. R. Cheeseman, G. Scalmani, V. Barone, G. A. Petersson, H. Nakatsuji, X. Li, M. Caricato, A. Marenich, J. Bloino, B. G. Janesko, R. Gomperts, B. Mennucci, H. P. Hratchian, J. V. Ortiz, A. F. Izmaylov, J. L. Sonnenberg, D. Williams-Young, F. Ding, F. Lipparini, F. Egidi, J. Goings, B. Peng, A. Petrone, T. Henderson, D. Ranasinghe, V. G. Zakrzewski, J. Gao, N. Rega, G. Zheng, W. Liang, M. Hada, M. Ehara, K. Toyota, R. Fukuda, J. Hasegawa, M. Ishida, T. Nakajima, Y. Honda, O. Kitao, H. Nakai, T. Vreven, K. Throssell, J. A. Montgomery, J. J. E. Peralta, F. Ogliaro, M. Bearpark, J. J. Heyd, E. Brothers, K. N. Kudin, V. N. Staroverov, T. Keith, R. Kobayashi, J. Normand, K. Raghavachari, A. Rendell, J. C. Burant, S. S. Iyengar, J. Tomasi, M. Cossi, J. M. Millam, M. Klene, C. Adamo, R. Cammi, J. W. Ochterski, R. L. Martin, K. Morokuma, O. Farkas, J. B. Foresman and D. J. Fox, Gaussian, Inc., Wallingford CT, 2016.
- [5] A. D. J. Becke, *J. Chem. Phys.*, 1993, **98**, 5648–5652 and references therein.
- [6] (a) D. Andrae, U. Haeussermann, M. Dolg, H. Stoll and H. Preuss, *Theor. Chim. Acta.*, 1990, **77**, 123–141; (b) J. M. L. Martin and A. Sundermann, *J. Chem. Phys.* 2001, **114**, 3408–3420.
- [7] A. Bergner, M. Dolg, W. Kuechle, H. Stoll and H. Preuss, *Mol. Phys.*, 1993, **80**, 1431–1441.
- [8] (a) P. C. Hariharan and J. A. Pople, *Theor. Chem. Acc.*, 1973, **28**, 213–222; (b) W. J. Hehre, R. Ditchfield and J. A. Pople, *J. Chem. Phys.*, 1972, **56**, 2257–2261.
